# Supplementary material for: Novel Systems Modeling Methodology in Comparative Microbial Metabolomics: Identifying Key Enzymes and Metabolites Implicated in Autism Spectrum Disorders
Source: Int J Mol Sci. 2015 Apr 22;16(4):8949–67. doi: 10.3390/ijms16048949 (PMC4425117; doi:10.3390/ijms16048949)
Supplement: Supplementary file 1 [file ijms-16-08949-s001.xlsx]

## Sheet: Table S1-Organism Inclusion
	Table S1. Organism Inclusion.
		"Healthy" microbiome	"Autism" microbiome
	Included in query 1	Bacteroides fragilis	Desulfovibrio desulfuricans
		Bifidobacterium longum	Clostridium perfringens
		Ruminococcus bromii	Clostridium difficile
		Roseburia intestinalis	Akkermansia muciniphila
		Faecalibacterium prausnitzii
		Eubacterium rectale
		Alistipes putredinis
		Alistipes shahii
		Weissella koreensis
		Prevotella ruminicola
		Odoribacter splanchnicus
		Methanobrevibacter smithii
		Clostridium leptum
		Lactobacillus acidophilus
	Additional organisms included	Bacteroides thetaiotaomicron	Sutterella wadswothensis
	in query 2	Bacteroides caccae	Clostridium bolteae
			Bacteroides vulgatus
	Desired by not included	Bacteroides finegoldii	Desulfovibrio piger
		Bacteroides ovatus	Desulfovibrio intestinalis
		Bacteroides uniformis	Clostridium butyricum
		Bifidobacterium adolescentis	Clostridium paraputrificum
		Bifidobacterium pseudolongum	Clostridium subterminale
		Eubacterium siraeum	Clostridium tertium
		Dorea	Clostridium bifermentans
		Veillonella	Clostridium glycolicum
		Turicibacter	Bacteroides stercoris
		Barnesiella intestinihominis	Parabacteroides distasonis
		Odoribacter laneus	Parabacteroides merdae
		Dialister invisus	Paraprevotella xylaniphila
			Eubacterium eligens
			Prevotella oulorum

## Sheet: Table S2-Query1 Raw Data
Table S2. Query1 Raw Data.
URL: cheberling-homepc.com/comparative_microbial_metabolomics/gene_search_form.cgi
Form results, 10-12-2014, 18:20					**Notes: in the previous saved query results, database entries were incorrect (EC number and enzyme name mismatch); database is fixed now
Comparative Microbial Metabolomics - Enzyme Search Form
Author: Colin Heberling, 2014									Search document (use CTRL+F) for 'unique' to quickly jump to tables 2 and 3
Questions and concerns, please contact colin.heberling@gmail.com
Enzyme data is taken from the Enzyme Nomenclature Database: Bairoch A. The ENZYME database in 2000. Nucleic Acids Res. 28:304-305(2000).
Instructions:
Choose two groups of microbial genomes (microbiomes) from the following multi-select forms, enter a search term to match against potential coded enzymes, then click 'Submit'. You will be presented with three tables: one showing enzymes with identical enzyme commission (EC) numbers between your two microbiomes, and two more showing coded enzymes that are unique for each microbiome. Only entries ma…
To save results to file, highlight all text (CTRL+A on Windows systems), copy text, open a new document and paste text. In MS Excel, right click inside a cell and choose 'paste special', and choose to paste 'text'. Adjust column widths as you see fit.
Organisms in Control:
167660682	Alistipes putredinis DSM 17216
291516108	Alistipes shahii WAL 8301
60495220	Bacteroides fragilis ATCC 25285 = NCTC 93
666001751	Bifidobacterium longum BXY01
156867138	Clostridium leptum DSM 753
291526581	Eubacterium rectale DSM 17629
295102938	Faecalibacterium prausnitzii L2/6
488447870	Lactobacillus acidophilus La-14
148552872	Methanobrevibacter smithii ATCC 35061; PS; DSMZ
324314063	Odoribacter splanchnicus DSM 220712
294473972	Prevotella ruminicola Bryant 23
291541371	Roseburia intestinalis XB6B4
291543183	Ruminococcus bromii L2-63
338855045	Weissella koreensis KACC 15510
Organisms in Autism:
187426706	Akkermansia muciniphila ATCC BAA-835
110676061	Clostridium perfringens ATCC 13124
219869941	Desulfovibrio desulfuricans ATCC 27774
115252745	Peptoclostridium difficile 630
Received search term query ''.
Similar coded enzymes: 19959 match(es).
GI Accession	Organism Name	EC_number	Enzyme Name	Biochemistry	Microbiome Name
167660682	Alistipes putredinis DSM 17216	2.3.1.129	Acyl-[acyl-carrier-protein]--UDP-N-acetylglucosamine O-acyltransferase.	(R)-3-hydroxytetradecanoyl-[acyl-carrier-protein] + UDP-N-acetyl-alpha-D-glucosamine = [acyl-carrier-protein] + UDP-3-O-(3-hydroxytetradecanoyl)-N-acetyl-alpha-D-glucosamine.	Control
187426706	Akkermansia muciniphila ATCC BAA-835	2.3.1.129	Acyl-[acyl-carrier-protein]--UDP-N-acetylglucosamine O-acyltransferase.	(R)-3-hydroxytetradecanoyl-[acyl-carrier-protein] + UDP-N-acetyl-alpha-D-glucosamine = [acyl-carrier-protein] + UDP-3-O-(3-hydroxytetradecanoyl)-N-acetyl-alpha-D-glucosamine.	Autism
167660682	Alistipes putredinis DSM 17216	2.1.1.61	tRNA (5-methylaminomethyl-2-thiouridylate)-methyltransferase.	S-adenosyl-L-methionine + tRNA containing 5-aminomethyl-2-thiouridine =S-adenosyl-L-homocysteine + tRNA containing 5-methylaminomethyl-2-thiouridylate.	Control
187426706	Akkermansia muciniphila ATCC BAA-835	2.1.1.61	tRNA (5-methylaminomethyl-2-thiouridylate)-methyltransferase.	S-adenosyl-L-methionine + tRNA containing 5-aminomethyl-2-thiouridine =S-adenosyl-L-homocysteine + tRNA containing 5-methylaminomethyl-2-thiouridylate.	Autism
167660682	Alistipes putredinis DSM 17216	2.1.1.61	tRNA (5-methylaminomethyl-2-thiouridylate)-methyltransferase.	S-adenosyl-L-methionine + tRNA containing 5-aminomethyl-2-thiouridine =S-adenosyl-L-homocysteine + tRNA containing 5-methylaminomethyl-2-thiouridylate.	Control
110676061	Clostridium perfringens ATCC 13124	2.1.1.61	tRNA (5-methylaminomethyl-2-thiouridylate)-methyltransferase.	S-adenosyl-L-methionine + tRNA containing 5-aminomethyl-2-thiouridine =S-adenosyl-L-homocysteine + tRNA containing 5-methylaminomethyl-2-thiouridylate.	Autism
167660682	Alistipes putredinis DSM 17216	2.1.1.61	tRNA (5-methylaminomethyl-2-thiouridylate)-methyltransferase.	S-adenosyl-L-methionine + tRNA containing 5-aminomethyl-2-thiouridine =S-adenosyl-L-homocysteine + tRNA containing 5-methylaminomethyl-2-thiouridylate.	Control
219869941	Desulfovibrio desulfuricans ATCC 27774	2.1.1.61	tRNA (5-methylaminomethyl-2-thiouridylate)-methyltransferase.	S-adenosyl-L-methionine + tRNA containing 5-aminomethyl-2-thiouridine =S-adenosyl-L-homocysteine + tRNA containing 5-methylaminomethyl-2-thiouridylate.	Autism
167660682	Alistipes putredinis DSM 17216	2.5.1.19	3-phosphoshikimate 1-carboxyvinyltransferase.	Phosphoenolpyruvate + 3-phosphoshikimate = phosphate + 5-O-(1-carboxyvinyl)-3-phosphoshikimate.	Control
187426706	Akkermansia muciniphila ATCC BAA-835	2.5.1.19	3-phosphoshikimate 1-carboxyvinyltransferase.	Phosphoenolpyruvate + 3-phosphoshikimate = phosphate + 5-O-(1-carboxyvinyl)-3-phosphoshikimate.	Autism
167660682	Alistipes putredinis DSM 17216	2.5.1.19	3-phosphoshikimate 1-carboxyvinyltransferase.	Phosphoenolpyruvate + 3-phosphoshikimate = phosphate + 5-O-(1-carboxyvinyl)-3-phosphoshikimate.	Control
110676061	Clostridium perfringens ATCC 13124	2.5.1.19	3-phosphoshikimate 1-carboxyvinyltransferase.	Phosphoenolpyruvate + 3-phosphoshikimate = phosphate + 5-O-(1-carboxyvinyl)-3-phosphoshikimate.	Autism
167660682	Alistipes putredinis DSM 17216	2.5.1.19	3-phosphoshikimate 1-carboxyvinyltransferase.	Phosphoenolpyruvate + 3-phosphoshikimate = phosphate + 5-O-(1-carboxyvinyl)-3-phosphoshikimate.	Control
219869941	Desulfovibrio desulfuricans ATCC 27774	2.5.1.19	3-phosphoshikimate 1-carboxyvinyltransferase.	Phosphoenolpyruvate + 3-phosphoshikimate = phosphate + 5-O-(1-carboxyvinyl)-3-phosphoshikimate.	Autism
167660682	Alistipes putredinis DSM 17216	2.5.1.19	3-phosphoshikimate 1-carboxyvinyltransferase.	Phosphoenolpyruvate + 3-phosphoshikimate = phosphate + 5-O-(1-carboxyvinyl)-3-phosphoshikimate.	Control
115252745	Peptoclostridium difficile 630	2.5.1.19	3-phosphoshikimate 1-carboxyvinyltransferase.	Phosphoenolpyruvate + 3-phosphoshikimate = phosphate + 5-O-(1-carboxyvinyl)-3-phosphoshikimate.	Autism
167660682	Alistipes putredinis DSM 17216	1.2.7.1	Pyruvate synthase.	Pyruvate + CoA + 2 oxidized ferredoxin = acetyl-CoA + CO(2) + 2 reducedferredoxin + 2 H(+).	Control
110676061	Clostridium perfringens ATCC 13124	1.2.7.1	Pyruvate synthase.	Pyruvate + CoA + 2 oxidized ferredoxin = acetyl-CoA + CO(2) + 2 reducedferredoxin + 2 H(+).	Autism
167660682	Alistipes putredinis DSM 17216	6.3.1.5	NAD(+) synthase.	ATP + deamido-NAD(+) + NH(3) = AMP + diphosphate + NAD(+).	Control
110676061	Clostridium perfringens ATCC 13124	6.3.1.5	NAD(+) synthase.	ATP + deamido-NAD(+) + NH(3) = AMP + diphosphate + NAD(+).	Autism
167660682	Alistipes putredinis DSM 17216	6.3.1.5	NAD(+) synthase.	ATP + deamido-NAD(+) + NH(3) = AMP + diphosphate + NAD(+).	Control
115252745	Peptoclostridium difficile 630	6.3.1.5	NAD(+) synthase.	ATP + deamido-NAD(+) + NH(3) = AMP + diphosphate + NAD(+).	Autism
167660682	Alistipes putredinis DSM 17216	2.4.2.8	Hypoxanthine phosphoribosyltransferase.	IMP + diphosphate = hypoxanthine + 5-phospho-alpha-D-ribose1-diphosphate.	Control
110676061	Clostridium perfringens ATCC 13124	2.4.2.8	Hypoxanthine phosphoribosyltransferase.	IMP + diphosphate = hypoxanthine + 5-phospho-alpha-D-ribose1-diphosphate.	Autism
167660682	Alistipes putredinis DSM 17216	2.4.2.8	Hypoxanthine phosphoribosyltransferase.	IMP + diphosphate = hypoxanthine + 5-phospho-alpha-D-ribose1-diphosphate.	Control
110676061	Clostridium perfringens ATCC 13124	2.4.2.8	Hypoxanthine phosphoribosyltransferase.	IMP + diphosphate = hypoxanthine + 5-phospho-alpha-D-ribose1-diphosphate.	Autism
167660682	Alistipes putredinis DSM 17216	2.4.2.8	Hypoxanthine phosphoribosyltransferase.	IMP + diphosphate = hypoxanthine + 5-phospho-alpha-D-ribose1-diphosphate.	Control
219869941	Desulfovibrio desulfuricans ATCC 27774	2.4.2.8	Hypoxanthine phosphoribosyltransferase.	IMP + diphosphate = hypoxanthine + 5-phospho-alpha-D-ribose1-diphosphate.	Autism
167660682	Alistipes putredinis DSM 17216	2.4.2.8	Hypoxanthine phosphoribosyltransferase.	IMP + diphosphate = hypoxanthine + 5-phospho-alpha-D-ribose1-diphosphate.	Control
115252745	Peptoclostridium difficile 630	2.4.2.8	Hypoxanthine phosphoribosyltransferase.	IMP + diphosphate = hypoxanthine + 5-phospho-alpha-D-ribose1-diphosphate.	Autism
167660682	Alistipes putredinis DSM 17216	2.4.2.8	Hypoxanthine phosphoribosyltransferase.	IMP + diphosphate = hypoxanthine + 5-phospho-alpha-D-ribose1-diphosphate.	Control
115252745	Peptoclostridium difficile 630	2.4.2.8	Hypoxanthine phosphoribosyltransferase.	IMP + diphosphate = hypoxanthine + 5-phospho-alpha-D-ribose1-diphosphate.	Autism
167660682	Alistipes putredinis DSM 17216	2.7.4.16	Thiamine-phosphate kinase.	ATP + thiamine phosphate = ADP + thiamine diphosphate.	Control
219869941	Desulfovibrio desulfuricans ATCC 27774	2.7.4.16	Thiamine-phosphate kinase.	ATP + thiamine phosphate = ADP + thiamine diphosphate.	Autism
167660682	Alistipes putredinis DSM 17216	2.7.1.40	Pyruvate kinase.	ATP + pyruvate = ADP + phosphoenolpyruvate.	Control
187426706	Akkermansia muciniphila ATCC BAA-835	2.7.1.40	Pyruvate kinase.	ATP + pyruvate = ADP + phosphoenolpyruvate.	Autism
167660682	Alistipes putredinis DSM 17216	2.7.1.40	Pyruvate kinase.	ATP + pyruvate = ADP + phosphoenolpyruvate.	Control
110676061	Clostridium perfringens ATCC 13124	2.7.1.40	Pyruvate kinase.	ATP + pyruvate = ADP + phosphoenolpyruvate.	Autism
167660682	Alistipes putredinis DSM 17216	2.7.1.40	Pyruvate kinase.	ATP + pyruvate = ADP + phosphoenolpyruvate.	Control
110676061	Clostridium perfringens ATCC 13124	2.7.1.40	Pyruvate kinase.	ATP + pyruvate = ADP + phosphoenolpyruvate.	Autism
167660682	Alistipes putredinis DSM 17216	2.7.1.40	Pyruvate kinase.	ATP + pyruvate = ADP + phosphoenolpyruvate.	Control
219869941	Desulfovibrio desulfuricans ATCC 27774	2.7.1.40	Pyruvate kinase.	ATP + pyruvate = ADP + phosphoenolpyruvate.	Autism
167660682	Alistipes putredinis DSM 17216	2.7.1.40	Pyruvate kinase.	ATP + pyruvate = ADP + phosphoenolpyruvate.	Control
115252745	Peptoclostridium difficile 630	2.7.1.40	Pyruvate kinase.	ATP + pyruvate = ADP + phosphoenolpyruvate.	Autism
167660682	Alistipes putredinis DSM 17216	2.7.2.7	Butyrate kinase.	ATP + butanoate = ADP + butanoyl phosphate.	Control
115252745	Peptoclostridium difficile 630	2.7.2.7	Butyrate kinase.	ATP + butanoate = ADP + butanoyl phosphate.	Autism
167660682	Alistipes putredinis DSM 17216	2.7.2.7	Butyrate kinase.	ATP + butanoate = ADP + butanoyl phosphate.	Control
115252745	Peptoclostridium difficile 630	2.7.2.7	Butyrate kinase.	ATP + butanoate = ADP + butanoyl phosphate.	Autism
167660682	Alistipes putredinis DSM 17216	2.7.2.7	Butyrate kinase.	ATP + butanoate = ADP + butanoyl phosphate.	Control
115252745	Peptoclostridium difficile 630	2.7.2.7	Butyrate kinase.	ATP + butanoate = ADP + butanoyl phosphate.	Autism
167660682	Alistipes putredinis DSM 17216	2.7.2.1	Acetate kinase.	ATP + acetate = ADP + acetyl phosphate.	Control
110676061	Clostridium perfringens ATCC 13124	2.7.2.1	Acetate kinase.	ATP + acetate = ADP + acetyl phosphate.	Autism
167660682	Alistipes putredinis DSM 17216	2.7.2.1	Acetate kinase.	ATP + acetate = ADP + acetyl phosphate.	Control
110676061	Clostridium perfringens ATCC 13124	2.7.2.1	Acetate kinase.	ATP + acetate = ADP + acetyl phosphate.	Autism
167660682	Alistipes putredinis DSM 17216	2.7.2.1	Acetate kinase.	ATP + acetate = ADP + acetyl phosphate.	Control
115252745	Peptoclostridium difficile 630	2.7.2.1	Acetate kinase.	ATP + acetate = ADP + acetyl phosphate.	Autism
167660682	Alistipes putredinis DSM 17216	6.3.4.2	CTP synthase (glutamine hydrolyzing).	ATP + UTP + L-glutamine = ADP + phosphate + CTP + L-glutamate.	Control
187426706	Akkermansia muciniphila ATCC BAA-835	6.3.4.2	CTP synthase (glutamine hydrolyzing).	ATP + UTP + L-glutamine = ADP + phosphate + CTP + L-glutamate.	Autism
167660682	Alistipes putredinis DSM 17216	6.3.4.2	CTP synthase (glutamine hydrolyzing).	ATP + UTP + L-glutamine = ADP + phosphate + CTP + L-glutamate.	Control
110676061	Clostridium perfringens ATCC 13124	6.3.4.2	CTP synthase (glutamine hydrolyzing).	ATP + UTP + L-glutamine = ADP + phosphate + CTP + L-glutamate.	Autism
167660682	Alistipes putredinis DSM 17216	6.3.4.2	CTP synthase (glutamine hydrolyzing).	ATP + UTP + L-glutamine = ADP + phosphate + CTP + L-glutamate.	Control
219869941	Desulfovibrio desulfuricans ATCC 27774	6.3.4.2	CTP synthase (glutamine hydrolyzing).	ATP + UTP + L-glutamine = ADP + phosphate + CTP + L-glutamate.	Autism
167660682	Alistipes putredinis DSM 17216	2.7.6.1	Ribose-phosphate diphosphokinase.	ATP + D-ribose 5-phosphate = AMP + 5-phospho-alpha-D-ribose1-diphosphate.	Control
187426706	Akkermansia muciniphila ATCC BAA-835	2.7.6.1	Ribose-phosphate diphosphokinase.	ATP + D-ribose 5-phosphate = AMP + 5-phospho-alpha-D-ribose1-diphosphate.	Autism
167660682	Alistipes putredinis DSM 17216	2.7.6.1	Ribose-phosphate diphosphokinase.	ATP + D-ribose 5-phosphate = AMP + 5-phospho-alpha-D-ribose1-diphosphate.	Control
110676061	Clostridium perfringens ATCC 13124	2.7.6.1	Ribose-phosphate diphosphokinase.	ATP + D-ribose 5-phosphate = AMP + 5-phospho-alpha-D-ribose1-diphosphate.	Autism
167660682	Alistipes putredinis DSM 17216	2.7.6.1	Ribose-phosphate diphosphokinase.	ATP + D-ribose 5-phosphate = AMP + 5-phospho-alpha-D-ribose1-diphosphate.	Control
110676061	Clostridium perfringens ATCC 13124	2.7.6.1	Ribose-phosphate diphosphokinase.	ATP + D-ribose 5-phosphate = AMP + 5-phospho-alpha-D-ribose1-diphosphate.	Autism
167660682	Alistipes putredinis DSM 17216	2.7.6.1	Ribose-phosphate diphosphokinase.	ATP + D-ribose 5-phosphate = AMP + 5-phospho-alpha-D-ribose1-diphosphate.	Control
219869941	Desulfovibrio desulfuricans ATCC 27774	2.7.6.1	Ribose-phosphate diphosphokinase.	ATP + D-ribose 5-phosphate = AMP + 5-phospho-alpha-D-ribose1-diphosphate.	Autism
167660682	Alistipes putredinis DSM 17216	2.7.6.1	Ribose-phosphate diphosphokinase.	ATP + D-ribose 5-phosphate = AMP + 5-phospho-alpha-D-ribose1-diphosphate.	Control
115252745	Peptoclostridium difficile 630	2.7.6.1	Ribose-phosphate diphosphokinase.	ATP + D-ribose 5-phosphate = AMP + 5-phospho-alpha-D-ribose1-diphosphate.	Autism
167660682	Alistipes putredinis DSM 17216	2.7.1.24	Dephospho-CoA kinase.	ATP + 3'-dephospho-CoA = ADP + CoA.	Control
187426706	Akkermansia muciniphila ATCC BAA-835	2.7.1.24	Dephospho-CoA kinase.	ATP + 3'-dephospho-CoA = ADP + CoA.	Autism
167660682	Alistipes putredinis DSM 17216	2.7.1.24	Dephospho-CoA kinase.	ATP + 3'-dephospho-CoA = ADP + CoA.	Control
110676061	Clostridium perfringens ATCC 13124	2.7.1.24	Dephospho-CoA kinase.	ATP + 3'-dephospho-CoA = ADP + CoA.	Autism
167660682	Alistipes putredinis DSM 17216	2.7.1.24	Dephospho-CoA kinase.	ATP + 3'-dephospho-CoA = ADP + CoA.	Control
115252745	Peptoclostridium difficile 630	2.7.1.24	Dephospho-CoA kinase.	ATP + 3'-dephospho-CoA = ADP + CoA.	Autism
167660682	Alistipes putredinis DSM 17216	2.5.1.15	Dihydropteroate synthase.	(2-amino-4-hydroxy-7,8-dihydropteridin-6-yl)methyl diphosphate +4-aminobenzoate = diphosphate + dihydropteroate.	Control
187426706	Akkermansia muciniphila ATCC BAA-835	2.5.1.15	Dihydropteroate synthase.	(2-amino-4-hydroxy-7,8-dihydropteridin-6-yl)methyl diphosphate +4-aminobenzoate = diphosphate + dihydropteroate.	Autism
167660682	Alistipes putredinis DSM 17216	2.5.1.15	Dihydropteroate synthase.	(2-amino-4-hydroxy-7,8-dihydropteridin-6-yl)methyl diphosphate +4-aminobenzoate = diphosphate + dihydropteroate.	Control
110676061	Clostridium perfringens ATCC 13124	2.5.1.15	Dihydropteroate synthase.	(2-amino-4-hydroxy-7,8-dihydropteridin-6-yl)methyl diphosphate +4-aminobenzoate = diphosphate + dihydropteroate.	Autism
167660682	Alistipes putredinis DSM 17216	2.5.1.15	Dihydropteroate synthase.	(2-amino-4-hydroxy-7,8-dihydropteridin-6-yl)methyl diphosphate +4-aminobenzoate = diphosphate + dihydropteroate.	Control
219869941	Desulfovibrio desulfuricans ATCC 27774	2.5.1.15	Dihydropteroate synthase.	(2-amino-4-hydroxy-7,8-dihydropteridin-6-yl)methyl diphosphate +4-aminobenzoate = diphosphate + dihydropteroate.	Autism
167660682	Alistipes putredinis DSM 17216	2.5.1.15	Dihydropteroate synthase.	(2-amino-4-hydroxy-7,8-dihydropteridin-6-yl)methyl diphosphate +4-aminobenzoate = diphosphate + dihydropteroate.	Control
115252745	Peptoclostridium difficile 630	2.5.1.15	Dihydropteroate synthase.	(2-amino-4-hydroxy-7,8-dihydropteridin-6-yl)methyl diphosphate +4-aminobenzoate = diphosphate + dihydropteroate.	Autism
167660682	Alistipes putredinis DSM 17216	1.1.1.267	1-deoxy-D-xylulose-5-phosphate reductoisomerase.	2-C-methyl-D-erythritol 4-phosphate + NADP(+) = 1-deoxy-D-xylulose5-phosphate + NADPH.	Control
187426706	Akkermansia muciniphila ATCC BAA-835	1.1.1.267	1-deoxy-D-xylulose-5-phosphate reductoisomerase.	2-C-methyl-D-erythritol 4-phosphate + NADP(+) = 1-deoxy-D-xylulose5-phosphate + NADPH.	Autism
167660682	Alistipes putredinis DSM 17216	1.1.1.267	1-deoxy-D-xylulose-5-phosphate reductoisomerase.	2-C-methyl-D-erythritol 4-phosphate + NADP(+) = 1-deoxy-D-xylulose5-phosphate + NADPH.	Control
110676061	Clostridium perfringens ATCC 13124	1.1.1.267	1-deoxy-D-xylulose-5-phosphate reductoisomerase.	2-C-methyl-D-erythritol 4-phosphate + NADP(+) = 1-deoxy-D-xylulose5-phosphate + NADPH.	Autism
167660682	Alistipes putredinis DSM 17216	1.1.1.267	1-deoxy-D-xylulose-5-phosphate reductoisomerase.	2-C-methyl-D-erythritol 4-phosphate + NADP(+) = 1-deoxy-D-xylulose5-phosphate + NADPH.	Control
219869941	Desulfovibrio desulfuricans ATCC 27774	1.1.1.267	1-deoxy-D-xylulose-5-phosphate reductoisomerase.	2-C-methyl-D-erythritol 4-phosphate + NADP(+) = 1-deoxy-D-xylulose5-phosphate + NADPH.	Autism
167660682	Alistipes putredinis DSM 17216	1.1.1.267	1-deoxy-D-xylulose-5-phosphate reductoisomerase.	2-C-methyl-D-erythritol 4-phosphate + NADP(+) = 1-deoxy-D-xylulose5-phosphate + NADPH.	Control
115252745	Peptoclostridium difficile 630	1.1.1.267	1-deoxy-D-xylulose-5-phosphate reductoisomerase.	2-C-methyl-D-erythritol 4-phosphate + NADP(+) = 1-deoxy-D-xylulose5-phosphate + NADPH.	Autism
167660682	Alistipes putredinis DSM 17216	2.7.1.71	Shikimate kinase.	ATP + shikimate = ADP + shikimate 3-phosphate.	Control
187426706	Akkermansia muciniphila ATCC BAA-835	2.7.1.71	Shikimate kinase.	ATP + shikimate = ADP + shikimate 3-phosphate.	Autism
167660682	Alistipes putredinis DSM 17216	2.7.1.71	Shikimate kinase.	ATP + shikimate = ADP + shikimate 3-phosphate.	Control
110676061	Clostridium perfringens ATCC 13124	2.7.1.71	Shikimate kinase.	ATP + shikimate = ADP + shikimate 3-phosphate.	Autism
167660682	Alistipes putredinis DSM 17216	2.7.1.71	Shikimate kinase.	ATP + shikimate = ADP + shikimate 3-phosphate.	Control
219869941	Desulfovibrio desulfuricans ATCC 27774	2.7.1.71	Shikimate kinase.	ATP + shikimate = ADP + shikimate 3-phosphate.	Autism
167660682	Alistipes putredinis DSM 17216	2.7.1.71	Shikimate kinase.	ATP + shikimate = ADP + shikimate 3-phosphate.	Control
219869941	Desulfovibrio desulfuricans ATCC 27774	2.7.1.71	Shikimate kinase.	ATP + shikimate = ADP + shikimate 3-phosphate.	Autism
167660682	Alistipes putredinis DSM 17216	2.7.1.71	Shikimate kinase.	ATP + shikimate = ADP + shikimate 3-phosphate.	Control
115252745	Peptoclostridium difficile 630	2.7.1.71	Shikimate kinase.	ATP + shikimate = ADP + shikimate 3-phosphate.	Autism
167660682	Alistipes putredinis DSM 17216	5.1.1.3	Glutamate racemase.	L-glutamate = D-glutamate.	Control
110676061	Clostridium perfringens ATCC 13124	5.1.1.3	Glutamate racemase.	L-glutamate = D-glutamate.	Autism
167660682	Alistipes putredinis DSM 17216	5.1.1.3	Glutamate racemase.	L-glutamate = D-glutamate.	Control
219869941	Desulfovibrio desulfuricans ATCC 27774	5.1.1.3	Glutamate racemase.	L-glutamate = D-glutamate.	Autism
167660682	Alistipes putredinis DSM 17216	5.1.1.3	Glutamate racemase.	L-glutamate = D-glutamate.	Control
115252745	Peptoclostridium difficile 630	5.1.1.3	Glutamate racemase.	L-glutamate = D-glutamate.	Autism
167660682	Alistipes putredinis DSM 17216	5.99.1.3	DNA topoisomerase (ATP-hydrolyzing).	ATP-dependent breakage, passage and rejoining of double-stranded DNA.	Control
187426706	Akkermansia muciniphila ATCC BAA-835	5.99.1.3	DNA topoisomerase (ATP-hydrolyzing).	ATP-dependent breakage, passage and rejoining of double-stranded DNA.	Autism
167660682	Alistipes putredinis DSM 17216	5.99.1.3	DNA topoisomerase (ATP-hydrolyzing).	ATP-dependent breakage, passage and rejoining of double-stranded DNA.	Control
187426706	Akkermansia muciniphila ATCC BAA-835	5.99.1.3	DNA topoisomerase (ATP-hydrolyzing).	ATP-dependent breakage, passage and rejoining of double-stranded DNA.	Autism
167660682	Alistipes putredinis DSM 17216	5.99.1.3	DNA topoisomerase (ATP-hydrolyzing).	ATP-dependent breakage, passage and rejoining of double-stranded DNA.	Control
187426706	Akkermansia muciniphila ATCC BAA-835	5.99.1.3	DNA topoisomerase (ATP-hydrolyzing).	ATP-dependent breakage, passage and rejoining of double-stranded DNA.	Autism
167660682	Alistipes putredinis DSM 17216	5.99.1.3	DNA topoisomerase (ATP-hydrolyzing).	ATP-dependent breakage, passage and rejoining of double-stranded DNA.	Control
110676061	Clostridium perfringens ATCC 13124	5.99.1.3	DNA topoisomerase (ATP-hydrolyzing).	ATP-dependent breakage, passage and rejoining of double-stranded DNA.	Autism
167660682	Alistipes putredinis DSM 17216	5.99.1.3	DNA topoisomerase (ATP-hydrolyzing).	ATP-dependent breakage, passage and rejoining of double-stranded DNA.	Control
110676061	Clostridium perfringens ATCC 13124	5.99.1.3	DNA topoisomerase (ATP-hydrolyzing).	ATP-dependent breakage, passage and rejoining of double-stranded DNA.	Autism
167660682	Alistipes putredinis DSM 17216	5.99.1.3	DNA topoisomerase (ATP-hydrolyzing).	ATP-dependent breakage, passage and rejoining of double-stranded DNA.	Control
219869941	Desulfovibrio desulfuricans ATCC 27774	5.99.1.3	DNA topoisomerase (ATP-hydrolyzing).	ATP-dependent breakage, passage and rejoining of double-stranded DNA.	Autism
167660682	Alistipes putredinis DSM 17216	5.99.1.3	DNA topoisomerase (ATP-hydrolyzing).	ATP-dependent breakage, passage and rejoining of double-stranded DNA.	Control
219869941	Desulfovibrio desulfuricans ATCC 27774	5.99.1.3	DNA topoisomerase (ATP-hydrolyzing).	ATP-dependent breakage, passage and rejoining of double-stranded DNA.	Autism
167660682	Alistipes putredinis DSM 17216	5.99.1.3	DNA topoisomerase (ATP-hydrolyzing).	ATP-dependent breakage, passage and rejoining of double-stranded DNA.	Control
115252745	Peptoclostridium difficile 630	5.99.1.3	DNA topoisomerase (ATP-hydrolyzing).	ATP-dependent breakage, passage and rejoining of double-stranded DNA.	Autism
167660682	Alistipes putredinis DSM 17216	5.99.1.3	DNA topoisomerase (ATP-hydrolyzing).	ATP-dependent breakage, passage and rejoining of double-stranded DNA.	Control
115252745	Peptoclostridium difficile 630	5.99.1.3	DNA topoisomerase (ATP-hydrolyzing).	ATP-dependent breakage, passage and rejoining of double-stranded DNA.	Autism
167660682	Alistipes putredinis DSM 17216	4.3.3.7	4-hydroxy-tetrahydrodipicolinate synthase.	Pyruvate + L-aspartate-4-semialdehyde = (4S)-4-hydroxy-2,3,4,5-tetrahydro-(2S)-dipicolinate + H(2)O.	Control
187426706	Akkermansia muciniphila ATCC BAA-835	4.3.3.7	4-hydroxy-tetrahydrodipicolinate synthase.	Pyruvate + L-aspartate-4-semialdehyde = (4S)-4-hydroxy-2,3,4,5-tetrahydro-(2S)-dipicolinate + H(2)O.	Autism
167660682	Alistipes putredinis DSM 17216	4.3.3.7	4-hydroxy-tetrahydrodipicolinate synthase.	Pyruvate + L-aspartate-4-semialdehyde = (4S)-4-hydroxy-2,3,4,5-tetrahydro-(2S)-dipicolinate + H(2)O.	Control
110676061	Clostridium perfringens ATCC 13124	4.3.3.7	4-hydroxy-tetrahydrodipicolinate synthase.	Pyruvate + L-aspartate-4-semialdehyde = (4S)-4-hydroxy-2,3,4,5-tetrahydro-(2S)-dipicolinate + H(2)O.	Autism
167660682	Alistipes putredinis DSM 17216	4.3.3.7	4-hydroxy-tetrahydrodipicolinate synthase.	Pyruvate + L-aspartate-4-semialdehyde = (4S)-4-hydroxy-2,3,4,5-tetrahydro-(2S)-dipicolinate + H(2)O.	Control
219869941	Desulfovibrio desulfuricans ATCC 27774	4.3.3.7	4-hydroxy-tetrahydrodipicolinate synthase.	Pyruvate + L-aspartate-4-semialdehyde = (4S)-4-hydroxy-2,3,4,5-tetrahydro-(2S)-dipicolinate + H(2)O.	Autism
167660682	Alistipes putredinis DSM 17216	4.3.3.7	4-hydroxy-tetrahydrodipicolinate synthase.	Pyruvate + L-aspartate-4-semialdehyde = (4S)-4-hydroxy-2,3,4,5-tetrahydro-(2S)-dipicolinate + H(2)O.	Control
115252745	Peptoclostridium difficile 630	4.3.3.7	4-hydroxy-tetrahydrodipicolinate synthase.	Pyruvate + L-aspartate-4-semialdehyde = (4S)-4-hydroxy-2,3,4,5-tetrahydro-(2S)-dipicolinate + H(2)O.	Autism
167660682	Alistipes putredinis DSM 17216	4.3.3.7	4-hydroxy-tetrahydrodipicolinate synthase.	Pyruvate + L-aspartate-4-semialdehyde = (4S)-4-hydroxy-2,3,4,5-tetrahydro-(2S)-dipicolinate + H(2)O.	Control
115252745	Peptoclostridium difficile 630	4.3.3.7	4-hydroxy-tetrahydrodipicolinate synthase.	Pyruvate + L-aspartate-4-semialdehyde = (4S)-4-hydroxy-2,3,4,5-tetrahydro-(2S)-dipicolinate + H(2)O.	Autism
167660682	Alistipes putredinis DSM 17216	4.3.3.7	4-hydroxy-tetrahydrodipicolinate synthase.	Pyruvate + L-aspartate-4-semialdehyde = (4S)-4-hydroxy-2,3,4,5-tetrahydro-(2S)-dipicolinate + H(2)O.	Control
115252745	Peptoclostridium difficile 630	4.3.3.7	4-hydroxy-tetrahydrodipicolinate synthase.	Pyruvate + L-aspartate-4-semialdehyde = (4S)-4-hydroxy-2,3,4,5-tetrahydro-(2S)-dipicolinate + H(2)O.	Autism
167660682	Alistipes putredinis DSM 17216	4.3.3.7	4-hydroxy-tetrahydrodipicolinate synthase.	Pyruvate + L-aspartate-4-semialdehyde = (4S)-4-hydroxy-2,3,4,5-tetrahydro-(2S)-dipicolinate + H(2)O.	Control
115252745	Peptoclostridium difficile 630	4.3.3.7	4-hydroxy-tetrahydrodipicolinate synthase.	Pyruvate + L-aspartate-4-semialdehyde = (4S)-4-hydroxy-2,3,4,5-tetrahydro-(2S)-dipicolinate + H(2)O.	Autism
167660682	Alistipes putredinis DSM 17216	6.5.1.2	DNA ligase (NAD(+)).	NAD(+) + (deoxyribonucleotide)(n) + (deoxyribonucleotide)(m) = AMP +beta-nicotinamide D-ribonucleotide + (deoxyribonucleotide)(n+m).	Control
187426706	Akkermansia muciniphila ATCC BAA-835	6.5.1.2	DNA ligase (NAD(+)).	NAD(+) + (deoxyribonucleotide)(n) + (deoxyribonucleotide)(m) = AMP +beta-nicotinamide D-ribonucleotide + (deoxyribonucleotide)(n+m).	Autism
167660682	Alistipes putredinis DSM 17216	6.5.1.2	DNA ligase (NAD(+)).	NAD(+) + (deoxyribonucleotide)(n) + (deoxyribonucleotide)(m) = AMP +beta-nicotinamide D-ribonucleotide + (deoxyribonucleotide)(n+m).	Control
110676061	Clostridium perfringens ATCC 13124	6.5.1.2	DNA ligase (NAD(+)).	NAD(+) + (deoxyribonucleotide)(n) + (deoxyribonucleotide)(m) = AMP +beta-nicotinamide D-ribonucleotide + (deoxyribonucleotide)(n+m).	Autism
167660682	Alistipes putredinis DSM 17216	6.5.1.2	DNA ligase (NAD(+)).	NAD(+) + (deoxyribonucleotide)(n) + (deoxyribonucleotide)(m) = AMP +beta-nicotinamide D-ribonucleotide + (deoxyribonucleotide)(n+m).	Control
219869941	Desulfovibrio desulfuricans ATCC 27774	6.5.1.2	DNA ligase (NAD(+)).	NAD(+) + (deoxyribonucleotide)(n) + (deoxyribonucleotide)(m) = AMP +beta-nicotinamide D-ribonucleotide + (deoxyribonucleotide)(n+m).	Autism
167660682	Alistipes putredinis DSM 17216	6.5.1.2	DNA ligase (NAD(+)).	NAD(+) + (deoxyribonucleotide)(n) + (deoxyribonucleotide)(m) = AMP +beta-nicotinamide D-ribonucleotide + (deoxyribonucleotide)(n+m).	Control
115252745	Peptoclostridium difficile 630	6.5.1.2	DNA ligase (NAD(+)).	NAD(+) + (deoxyribonucleotide)(n) + (deoxyribonucleotide)(m) = AMP +beta-nicotinamide D-ribonucleotide + (deoxyribonucleotide)(n+m).	Autism
167660682	Alistipes putredinis DSM 17216	6.3.4.4	Adenylosuccinate synthase.	GTP + IMP + L-aspartate = GDP + phosphate + N(6)-(1,2-dicarboxyethyl)-AMP.	Control
187426706	Akkermansia muciniphila ATCC BAA-835	6.3.4.4	Adenylosuccinate synthase.	GTP + IMP + L-aspartate = GDP + phosphate + N(6)-(1,2-dicarboxyethyl)-AMP.	Autism
167660682	Alistipes putredinis DSM 17216	6.3.4.4	Adenylosuccinate synthase.	GTP + IMP + L-aspartate = GDP + phosphate + N(6)-(1,2-dicarboxyethyl)-AMP.	Control
110676061	Clostridium perfringens ATCC 13124	6.3.4.4	Adenylosuccinate synthase.	GTP + IMP + L-aspartate = GDP + phosphate + N(6)-(1,2-dicarboxyethyl)-AMP.	Autism
167660682	Alistipes putredinis DSM 17216	6.3.4.4	Adenylosuccinate synthase.	GTP + IMP + L-aspartate = GDP + phosphate + N(6)-(1,2-dicarboxyethyl)-AMP.	Control
219869941	Desulfovibrio desulfuricans ATCC 27774	6.3.4.4	Adenylosuccinate synthase.	GTP + IMP + L-aspartate = GDP + phosphate + N(6)-(1,2-dicarboxyethyl)-AMP.	Autism
167660682	Alistipes putredinis DSM 17216	6.3.4.4	Adenylosuccinate synthase.	GTP + IMP + L-aspartate = GDP + phosphate + N(6)-(1,2-dicarboxyethyl)-AMP.	Control
115252745	Peptoclostridium difficile 630	6.3.4.4	Adenylosuccinate synthase.	GTP + IMP + L-aspartate = GDP + phosphate + N(6)-(1,2-dicarboxyethyl)-AMP.	Autism
167660682	Alistipes putredinis DSM 17216	2.5.1.17	Cob(I)yrinic acid a,c-diamide adenosyltransferase.	(1) ATP + cob(I)yrinic acid a,c-diamide = triphosphate +adenosylcob(III)yrinic acid a,c-diamide.(2) ATP + cobinamide = triphosphate + adenosylcobinamide.	Control
110676061	Clostridium perfringens ATCC 13124	2.5.1.17	Cob(I)yrinic acid a,c-diamide adenosyltransferase.	(1) ATP + cob(I)yrinic acid a,c-diamide = triphosphate +adenosylcob(III)yrinic acid a,c-diamide.(2) ATP + cobinamide = triphosphate + adenosylcobinamide.	Autism
167660682	Alistipes putredinis DSM 17216	2.5.1.17	Cob(I)yrinic acid a,c-diamide adenosyltransferase.	(1) ATP + cob(I)yrinic acid a,c-diamide = triphosphate +adenosylcob(III)yrinic acid a,c-diamide.(2) ATP + cobinamide = triphosphate + adenosylcobinamide.	Control
115252745	Peptoclostridium difficile 630	2.5.1.17	Cob(I)yrinic acid a,c-diamide adenosyltransferase.	(1) ATP + cob(I)yrinic acid a,c-diamide = triphosphate +adenosylcob(III)yrinic acid a,c-diamide.(2) ATP + cobinamide = triphosphate + adenosylcobinamide.	Autism
167660682	Alistipes putredinis DSM 17216	3.5.1.2	Glutaminase.	L-glutamine + H(2)O = L-glutamate + NH(3).	Control
187426706	Akkermansia muciniphila ATCC BAA-835	3.5.1.2	Glutaminase.	L-glutamine + H(2)O = L-glutamate + NH(3).	Autism
167660682	Alistipes putredinis DSM 17216	3.5.1.2	Glutaminase.	L-glutamine + H(2)O = L-glutamate + NH(3).	Control
110676061	Clostridium perfringens ATCC 13124	3.5.1.2	Glutaminase.	L-glutamine + H(2)O = L-glutamate + NH(3).	Autism
167660682	Alistipes putredinis DSM 17216	3.5.1.2	Glutaminase.	L-glutamine + H(2)O = L-glutamate + NH(3).	Control
219869941	Desulfovibrio desulfuricans ATCC 27774	3.5.1.2	Glutaminase.	L-glutamine + H(2)O = L-glutamate + NH(3).	Autism
167660682	Alistipes putredinis DSM 17216	3.5.1.2	Glutaminase.	L-glutamine + H(2)O = L-glutamate + NH(3).	Control
115252745	Peptoclostridium difficile 630	3.5.1.2	Glutaminase.	L-glutamine + H(2)O = L-glutamate + NH(3).	Autism
167660682	Alistipes putredinis DSM 17216	3.2.2.20	DNA-3-methyladenine glycosylase I.	Hydrolysis of alkylated DNA, releasing 3-methyladenine.	Control
187426706	Akkermansia muciniphila ATCC BAA-835	3.2.2.20	DNA-3-methyladenine glycosylase I.	Hydrolysis of alkylated DNA, releasing 3-methyladenine.	Autism
167660682	Alistipes putredinis DSM 17216	4.6.1.12	2-C-methyl-D-erythritol 2,4-cyclodiphosphate synthase.	2-phospho-4-(cytidine 5'-diphospho)-2-C-methyl-D-erythritol = 2-C-methyl-D-erythritol 2,4-cyclodiphosphate + CMP.	Control
187426706	Akkermansia muciniphila ATCC BAA-835	4.6.1.12	2-C-methyl-D-erythritol 2,4-cyclodiphosphate synthase.	2-phospho-4-(cytidine 5'-diphospho)-2-C-methyl-D-erythritol = 2-C-methyl-D-erythritol 2,4-cyclodiphosphate + CMP.	Autism
167660682	Alistipes putredinis DSM 17216	4.6.1.12	2-C-methyl-D-erythritol 2,4-cyclodiphosphate synthase.	2-phospho-4-(cytidine 5'-diphospho)-2-C-methyl-D-erythritol = 2-C-methyl-D-erythritol 2,4-cyclodiphosphate + CMP.	Control
110676061	Clostridium perfringens ATCC 13124	4.6.1.12	2-C-methyl-D-erythritol 2,4-cyclodiphosphate synthase.	2-phospho-4-(cytidine 5'-diphospho)-2-C-methyl-D-erythritol = 2-C-methyl-D-erythritol 2,4-cyclodiphosphate + CMP.	Autism
167660682	Alistipes putredinis DSM 17216	4.6.1.12	2-C-methyl-D-erythritol 2,4-cyclodiphosphate synthase.	2-phospho-4-(cytidine 5'-diphospho)-2-C-methyl-D-erythritol = 2-C-methyl-D-erythritol 2,4-cyclodiphosphate + CMP.	Control
115252745	Peptoclostridium difficile 630	4.6.1.12	2-C-methyl-D-erythritol 2,4-cyclodiphosphate synthase.	2-phospho-4-(cytidine 5'-diphospho)-2-C-methyl-D-erythritol = 2-C-methyl-D-erythritol 2,4-cyclodiphosphate + CMP.	Autism
167660682	Alistipes putredinis DSM 17216	6.1.1.19	Arginine--tRNA ligase.	ATP + L-arginine + tRNA(Arg) = AMP + diphosphate + L-arginyl-tRNA(Arg).	Control
187426706	Akkermansia muciniphila ATCC BAA-835	6.1.1.19	Arginine--tRNA ligase.	ATP + L-arginine + tRNA(Arg) = AMP + diphosphate + L-arginyl-tRNA(Arg).	Autism
167660682	Alistipes putredinis DSM 17216	6.1.1.19	Arginine--tRNA ligase.	ATP + L-arginine + tRNA(Arg) = AMP + diphosphate + L-arginyl-tRNA(Arg).	Control
110676061	Clostridium perfringens ATCC 13124	6.1.1.19	Arginine--tRNA ligase.	ATP + L-arginine + tRNA(Arg) = AMP + diphosphate + L-arginyl-tRNA(Arg).	Autism
167660682	Alistipes putredinis DSM 17216	6.1.1.19	Arginine--tRNA ligase.	ATP + L-arginine + tRNA(Arg) = AMP + diphosphate + L-arginyl-tRNA(Arg).	Control
219869941	Desulfovibrio desulfuricans ATCC 27774	6.1.1.19	Arginine--tRNA ligase.	ATP + L-arginine + tRNA(Arg) = AMP + diphosphate + L-arginyl-tRNA(Arg).	Autism
167660682	Alistipes putredinis DSM 17216	6.1.1.19	Arginine--tRNA ligase.	ATP + L-arginine + tRNA(Arg) = AMP + diphosphate + L-arginyl-tRNA(Arg).	Control
115252745	Peptoclostridium difficile 630	6.1.1.19	Arginine--tRNA ligase.	ATP + L-arginine + tRNA(Arg) = AMP + diphosphate + L-arginyl-tRNA(Arg).	Autism
167660682	Alistipes putredinis DSM 17216	4.2.3.3	Methylglyoxal synthase.	Glycerone phosphate = methylglyoxal + phosphate.	Control
110676061	Clostridium perfringens ATCC 13124	4.2.3.3	Methylglyoxal synthase.	Glycerone phosphate = methylglyoxal + phosphate.	Autism
167660682	Alistipes putredinis DSM 17216	4.2.3.3	Methylglyoxal synthase.	Glycerone phosphate = methylglyoxal + phosphate.	Control
115252745	Peptoclostridium difficile 630	4.2.3.3	Methylglyoxal synthase.	Glycerone phosphate = methylglyoxal + phosphate.	Autism
167660682	Alistipes putredinis DSM 17216	1.5.1.2	Pyrroline-5-carboxylate reductase.	L-proline + NAD(P)(+) = 1-pyrroline-5-carboxylate + NAD(P)H.	Control
187426706	Akkermansia muciniphila ATCC BAA-835	1.5.1.2	Pyrroline-5-carboxylate reductase.	L-proline + NAD(P)(+) = 1-pyrroline-5-carboxylate + NAD(P)H.	Autism
167660682	Alistipes putredinis DSM 17216	1.5.1.2	Pyrroline-5-carboxylate reductase.	L-proline + NAD(P)(+) = 1-pyrroline-5-carboxylate + NAD(P)H.	Control
110676061	Clostridium perfringens ATCC 13124	1.5.1.2	Pyrroline-5-carboxylate reductase.	L-proline + NAD(P)(+) = 1-pyrroline-5-carboxylate + NAD(P)H.	Autism
167660682	Alistipes putredinis DSM 17216	1.5.1.2	Pyrroline-5-carboxylate reductase.	L-proline + NAD(P)(+) = 1-pyrroline-5-carboxylate + NAD(P)H.	Control
219869941	Desulfovibrio desulfuricans ATCC 27774	1.5.1.2	Pyrroline-5-carboxylate reductase.	L-proline + NAD(P)(+) = 1-pyrroline-5-carboxylate + NAD(P)H.	Autism
167660682	Alistipes putredinis DSM 17216	1.5.1.2	Pyrroline-5-carboxylate reductase.	L-proline + NAD(P)(+) = 1-pyrroline-5-carboxylate + NAD(P)H.	Control
115252745	Peptoclostridium difficile 630	1.5.1.2	Pyrroline-5-carboxylate reductase.	L-proline + NAD(P)(+) = 1-pyrroline-5-carboxylate + NAD(P)H.	Autism
167660682	Alistipes putredinis DSM 17216	1.5.1.2	Pyrroline-5-carboxylate reductase.	L-proline + NAD(P)(+) = 1-pyrroline-5-carboxylate + NAD(P)H.	Control
115252745	Peptoclostridium difficile 630	1.5.1.2	Pyrroline-5-carboxylate reductase.	L-proline + NAD(P)(+) = 1-pyrroline-5-carboxylate + NAD(P)H.	Autism
167660682	Alistipes putredinis DSM 17216	3.1.3.3	Phosphoserine phosphatase.	O-phospho-L(or D)-serine + H(2)O = L(or D)-serine + phosphate.	Control
115252745	Peptoclostridium difficile 630	3.1.3.3	Phosphoserine phosphatase.	O-phospho-L(or D)-serine + H(2)O = L(or D)-serine + phosphate.	Autism
167660682	Alistipes putredinis DSM 17216	3.4.21.89	Signal peptidase I.	Cleavage of hydrophobic, N-terminal signal or leader sequences fromsecreted and periplasmic proteins.	Control
110676061	Clostridium perfringens ATCC 13124	3.4.21.89	Signal peptidase I.	Cleavage of hydrophobic, N-terminal signal or leader sequences fromsecreted and periplasmic proteins.	Autism
167660682	Alistipes putredinis DSM 17216	3.4.21.89	Signal peptidase I.	Cleavage of hydrophobic, N-terminal signal or leader sequences fromsecreted and periplasmic proteins.	Control
110676061	Clostridium perfringens ATCC 13124	3.4.21.89	Signal peptidase I.	Cleavage of hydrophobic, N-terminal signal or leader sequences fromsecreted and periplasmic proteins.	Autism
167660682	Alistipes putredinis DSM 17216	3.4.21.89	Signal peptidase I.	Cleavage of hydrophobic, N-terminal signal or leader sequences fromsecreted and periplasmic proteins.	Control
110676061	Clostridium perfringens ATCC 13124	3.4.21.89	Signal peptidase I.	Cleavage of hydrophobic, N-terminal signal or leader sequences fromsecreted and periplasmic proteins.	Autism
167660682	Alistipes putredinis DSM 17216	3.4.21.89	Signal peptidase I.	Cleavage of hydrophobic, N-terminal signal or leader sequences fromsecreted and periplasmic proteins.	Control
110676061	Clostridium perfringens ATCC 13124	3.4.21.89	Signal peptidase I.	Cleavage of hydrophobic, N-terminal signal or leader sequences fromsecreted and periplasmic proteins.	Autism
167660682	Alistipes putredinis DSM 17216	3.4.21.89	Signal peptidase I.	Cleavage of hydrophobic, N-terminal signal or leader sequences fromsecreted and periplasmic proteins.	Control
110676061	Clostridium perfringens ATCC 13124	3.4.21.89	Signal peptidase I.	Cleavage of hydrophobic, N-terminal signal or leader sequences fromsecreted and periplasmic proteins.	Autism
167660682	Alistipes putredinis DSM 17216	3.4.21.89	Signal peptidase I.	Cleavage of hydrophobic, N-terminal signal or leader sequences fromsecreted and periplasmic proteins.	Control
110676061	Clostridium perfringens ATCC 13124	3.4.21.89	Signal peptidase I.	Cleavage of hydrophobic, N-terminal signal or leader sequences fromsecreted and periplasmic proteins.	Autism
167660682	Alistipes putredinis DSM 17216	3.4.21.89	Signal peptidase I.	Cleavage of hydrophobic, N-terminal signal or leader sequences fromsecreted and periplasmic proteins.	Control
219869941	Desulfovibrio desulfuricans ATCC 27774	3.4.21.89	Signal peptidase I.	Cleavage of hydrophobic, N-terminal signal or leader sequences fromsecreted and periplasmic proteins.	Autism
167660682	Alistipes putredinis DSM 17216	3.4.21.89	Signal peptidase I.	Cleavage of hydrophobic, N-terminal signal or leader sequences fromsecreted and periplasmic proteins.	Control
115252745	Peptoclostridium difficile 630	3.4.21.89	Signal peptidase I.	Cleavage of hydrophobic, N-terminal signal or leader sequences fromsecreted and periplasmic proteins.	Autism
167660682	Alistipes putredinis DSM 17216	3.4.21.89	Signal peptidase I.	Cleavage of hydrophobic, N-terminal signal or leader sequences fromsecreted and periplasmic proteins.	Control
115252745	Peptoclostridium difficile 630	3.4.21.89	Signal peptidase I.	Cleavage of hydrophobic, N-terminal signal or leader sequences fromsecreted and periplasmic proteins.	Autism
167660682	Alistipes putredinis DSM 17216	3.4.21.89	Signal peptidase I.	Cleavage of hydrophobic, N-terminal signal or leader sequences fromsecreted and periplasmic proteins.	Control
115252745	Peptoclostridium difficile 630	3.4.21.89	Signal peptidase I.	Cleavage of hydrophobic, N-terminal signal or leader sequences fromsecreted and periplasmic proteins.	Autism
167660682	Alistipes putredinis DSM 17216	1.17.1.8	4-hydroxy-tetrahydrodipicolinate reductase.	(S)-2,3,4,5-tetrahydropyridine-2,6-dicarboxylate + NAD(P)(+) + H(2)O =(2S,4S)-4-hydroxy-2,3,4,5-tetrahydrodipicolinate + NAD(P)H.	Control
187426706	Akkermansia muciniphila ATCC BAA-835	1.17.1.8	4-hydroxy-tetrahydrodipicolinate reductase.	(S)-2,3,4,5-tetrahydropyridine-2,6-dicarboxylate + NAD(P)(+) + H(2)O =(2S,4S)-4-hydroxy-2,3,4,5-tetrahydrodipicolinate + NAD(P)H.	Autism
167660682	Alistipes putredinis DSM 17216	1.17.1.8	4-hydroxy-tetrahydrodipicolinate reductase.	(S)-2,3,4,5-tetrahydropyridine-2,6-dicarboxylate + NAD(P)(+) + H(2)O =(2S,4S)-4-hydroxy-2,3,4,5-tetrahydrodipicolinate + NAD(P)H.	Control
110676061	Clostridium perfringens ATCC 13124	1.17.1.8	4-hydroxy-tetrahydrodipicolinate reductase.	(S)-2,3,4,5-tetrahydropyridine-2,6-dicarboxylate + NAD(P)(+) + H(2)O =(2S,4S)-4-hydroxy-2,3,4,5-tetrahydrodipicolinate + NAD(P)H.	Autism
167660682	Alistipes putredinis DSM 17216	1.17.1.8	4-hydroxy-tetrahydrodipicolinate reductase.	(S)-2,3,4,5-tetrahydropyridine-2,6-dicarboxylate + NAD(P)(+) + H(2)O =(2S,4S)-4-hydroxy-2,3,4,5-tetrahydrodipicolinate + NAD(P)H.	Control
219869941	Desulfovibrio desulfuricans ATCC 27774	1.17.1.8	4-hydroxy-tetrahydrodipicolinate reductase.	(S)-2,3,4,5-tetrahydropyridine-2,6-dicarboxylate + NAD(P)(+) + H(2)O =(2S,4S)-4-hydroxy-2,3,4,5-tetrahydrodipicolinate + NAD(P)H.	Autism
167660682	Alistipes putredinis DSM 17216	1.17.1.8	4-hydroxy-tetrahydrodipicolinate reductase.	(S)-2,3,4,5-tetrahydropyridine-2,6-dicarboxylate + NAD(P)(+) + H(2)O =(2S,4S)-4-hydroxy-2,3,4,5-tetrahydrodipicolinate + NAD(P)H.	Control
115252745	Peptoclostridium difficile 630	1.17.1.8	4-hydroxy-tetrahydrodipicolinate reductase.	(S)-2,3,4,5-tetrahydropyridine-2,6-dicarboxylate + NAD(P)(+) + H(2)O =(2S,4S)-4-hydroxy-2,3,4,5-tetrahydrodipicolinate + NAD(P)H.	Autism
167660682	Alistipes putredinis DSM 17216	1.17.1.8	4-hydroxy-tetrahydrodipicolinate reductase.	(S)-2,3,4,5-tetrahydropyridine-2,6-dicarboxylate + NAD(P)(+) + H(2)O =(2S,4S)-4-hydroxy-2,3,4,5-tetrahydrodipicolinate + NAD(P)H.	Control
115252745	Peptoclostridium difficile 630	1.17.1.8	4-hydroxy-tetrahydrodipicolinate reductase.	(S)-2,3,4,5-tetrahydropyridine-2,6-dicarboxylate + NAD(P)(+) + H(2)O =(2S,4S)-4-hydroxy-2,3,4,5-tetrahydrodipicolinate + NAD(P)H.	Autism
167660682	Alistipes putredinis DSM 17216	5.4.99.12	tRNA pseudouridine(38-40) synthase.	tRNA uridine(38-40) = tRNA pseudouridine(38-40).	Control
187426706	Akkermansia muciniphila ATCC BAA-835	5.4.99.12	tRNA pseudouridine(38-40) synthase.	tRNA uridine(38-40) = tRNA pseudouridine(38-40).	Autism
167660682	Alistipes putredinis DSM 17216	5.4.99.12	tRNA pseudouridine(38-40) synthase.	tRNA uridine(38-40) = tRNA pseudouridine(38-40).	Control
110676061	Clostridium perfringens ATCC 13124	5.4.99.12	tRNA pseudouridine(38-40) synthase.	tRNA uridine(38-40) = tRNA pseudouridine(38-40).	Autism
167660682	Alistipes putredinis DSM 17216	5.4.99.12	tRNA pseudouridine(38-40) synthase.	tRNA uridine(38-40) = tRNA pseudouridine(38-40).	Control
110676061	Clostridium perfringens ATCC 13124	5.4.99.12	tRNA pseudouridine(38-40) synthase.	tRNA uridine(38-40) = tRNA pseudouridine(38-40).	Autism
167660682	Alistipes putredinis DSM 17216	5.4.99.12	tRNA pseudouridine(38-40) synthase.	tRNA uridine(38-40) = tRNA pseudouridine(38-40).	Control
110676061	Clostridium perfringens ATCC 13124	5.4.99.12	tRNA pseudouridine(38-40) synthase.	tRNA uridine(38-40) = tRNA pseudouridine(38-40).	Autism
167660682	Alistipes putredinis DSM 17216	5.4.99.12	tRNA pseudouridine(38-40) synthase.	tRNA uridine(38-40) = tRNA pseudouridine(38-40).	Control
219869941	Desulfovibrio desulfuricans ATCC 27774	5.4.99.12	tRNA pseudouridine(38-40) synthase.	tRNA uridine(38-40) = tRNA pseudouridine(38-40).	Autism
167660682	Alistipes putredinis DSM 17216	5.4.99.12	tRNA pseudouridine(38-40) synthase.	tRNA uridine(38-40) = tRNA pseudouridine(38-40).	Control
115252745	Peptoclostridium difficile 630	5.4.99.12	tRNA pseudouridine(38-40) synthase.	tRNA uridine(38-40) = tRNA pseudouridine(38-40).	Autism
167660682	Alistipes putredinis DSM 17216	5.4.99.12	tRNA pseudouridine(38-40) synthase.	tRNA uridine(38-40) = tRNA pseudouridine(38-40).	Control
115252745	Peptoclostridium difficile 630	5.4.99.12	tRNA pseudouridine(38-40) synthase.	tRNA uridine(38-40) = tRNA pseudouridine(38-40).	Autism
167660682	Alistipes putredinis DSM 17216	1.8.1.4	Dihydrolipoyl dehydrogenase.	Protein N(6)-(dihydrolipoyl)lysine + NAD(+) = protein N(6)-(lipoyl)lysine+ NADH.	Control
115252745	Peptoclostridium difficile 630	1.8.1.4	Dihydrolipoyl dehydrogenase.	Protein N(6)-(dihydrolipoyl)lysine + NAD(+) = protein N(6)-(lipoyl)lysine+ NADH.	Autism
167660682	Alistipes putredinis DSM 17216	1.8.1.4	Dihydrolipoyl dehydrogenase.	Protein N(6)-(dihydrolipoyl)lysine + NAD(+) = protein N(6)-(lipoyl)lysine+ NADH.	Control
115252745	Peptoclostridium difficile 630	1.8.1.4	Dihydrolipoyl dehydrogenase.	Protein N(6)-(dihydrolipoyl)lysine + NAD(+) = protein N(6)-(lipoyl)lysine+ NADH.	Autism
167660682	Alistipes putredinis DSM 17216	2.7.7.18	Nicotinate-nucleotide adenylyltransferase.	ATP + beta-nicotinate-D-ribonucleotide = diphosphate + deamido-NAD(+).	Control
110676061	Clostridium perfringens ATCC 13124	2.7.7.18	Nicotinate-nucleotide adenylyltransferase.	ATP + beta-nicotinate-D-ribonucleotide = diphosphate + deamido-NAD(+).	Autism
167660682	Alistipes putredinis DSM 17216	2.7.7.18	Nicotinate-nucleotide adenylyltransferase.	ATP + beta-nicotinate-D-ribonucleotide = diphosphate + deamido-NAD(+).	Control
115252745	Peptoclostridium difficile 630	2.7.7.18	Nicotinate-nucleotide adenylyltransferase.	ATP + beta-nicotinate-D-ribonucleotide = diphosphate + deamido-NAD(+).	Autism
167660682	Alistipes putredinis DSM 17216	2.7.4.8	Guanylate kinase.	ATP + GMP = ADP + GDP.	Control
187426706	Akkermansia muciniphila ATCC BAA-835	2.7.4.8	Guanylate kinase.	ATP + GMP = ADP + GDP.	Autism
167660682	Alistipes putredinis DSM 17216	2.7.4.8	Guanylate kinase.	ATP + GMP = ADP + GDP.	Control
110676061	Clostridium perfringens ATCC 13124	2.7.4.8	Guanylate kinase.	ATP + GMP = ADP + GDP.	Autism
167660682	Alistipes putredinis DSM 17216	2.7.4.8	Guanylate kinase.	ATP + GMP = ADP + GDP.	Control
219869941	Desulfovibrio desulfuricans ATCC 27774	2.7.4.8	Guanylate kinase.	ATP + GMP = ADP + GDP.	Autism
167660682	Alistipes putredinis DSM 17216	2.7.4.8	Guanylate kinase.	ATP + GMP = ADP + GDP.	Control
115252745	Peptoclostridium difficile 630	2.7.4.8	Guanylate kinase.	ATP + GMP = ADP + GDP.	Autism
167660682	Alistipes putredinis DSM 17216	2.1.2.9	Methionyl-tRNA formyltransferase.	10-formyltetrahydrofolate + L-methionyl-tRNA(fMet) = tetrahydrofolate +N-formylmethionyl-tRNA(fMet).	Control
110676061	Clostridium perfringens ATCC 13124	2.1.2.9	Methionyl-tRNA formyltransferase.	10-formyltetrahydrofolate + L-methionyl-tRNA(fMet) = tetrahydrofolate +N-formylmethionyl-tRNA(fMet).	Autism
167660682	Alistipes putredinis DSM 17216	2.1.2.9	Methionyl-tRNA formyltransferase.	10-formyltetrahydrofolate + L-methionyl-tRNA(fMet) = tetrahydrofolate +N-formylmethionyl-tRNA(fMet).	Control
110676061	Clostridium perfringens ATCC 13124	2.1.2.9	Methionyl-tRNA formyltransferase.	10-formyltetrahydrofolate + L-methionyl-tRNA(fMet) = tetrahydrofolate +N-formylmethionyl-tRNA(fMet).	Autism
167660682	Alistipes putredinis DSM 17216	2.1.2.9	Methionyl-tRNA formyltransferase.	10-formyltetrahydrofolate + L-methionyl-tRNA(fMet) = tetrahydrofolate +N-formylmethionyl-tRNA(fMet).	Control
219869941	Desulfovibrio desulfuricans ATCC 27774	2.1.2.9	Methionyl-tRNA formyltransferase.	10-formyltetrahydrofolate + L-methionyl-tRNA(fMet) = tetrahydrofolate +N-formylmethionyl-tRNA(fMet).	Autism
167660682	Alistipes putredinis DSM 17216	2.1.2.9	Methionyl-tRNA formyltransferase.	10-formyltetrahydrofolate + L-methionyl-tRNA(fMet) = tetrahydrofolate +N-formylmethionyl-tRNA(fMet).	Control
115252745	Peptoclostridium difficile 630	2.1.2.9	Methionyl-tRNA formyltransferase.	10-formyltetrahydrofolate + L-methionyl-tRNA(fMet) = tetrahydrofolate +N-formylmethionyl-tRNA(fMet).	Autism
167660682	Alistipes putredinis DSM 17216	4.1.99.12	3,4-dihydroxy-2-butanone-4-phosphate synthase.	D-ribulose 5-phosphate = formate + L-3,4-dihydroxybutan-2-one4-phosphate.	Control
115252745	Peptoclostridium difficile 630	4.1.99.12	3,4-dihydroxy-2-butanone-4-phosphate synthase.	D-ribulose 5-phosphate = formate + L-3,4-dihydroxybutan-2-one4-phosphate.	Autism
167660682	Alistipes putredinis DSM 17216	1.1.1.1	Alcohol dehydrogenase.	(1) An alcohol + NAD(+) = an aldehyde or ketone + NADH.(2) A secondary alcohol + NAD(+) = a ketone + NADH.	Control
110676061	Clostridium perfringens ATCC 13124	1.1.1.1	Alcohol dehydrogenase.	(1) An alcohol + NAD(+) = an aldehyde or ketone + NADH.(2) A secondary alcohol + NAD(+) = a ketone + NADH.	Autism
167660682	Alistipes putredinis DSM 17216	1.1.1.1	Alcohol dehydrogenase.	(1) An alcohol + NAD(+) = an aldehyde or ketone + NADH.(2) A secondary alcohol + NAD(+) = a ketone + NADH.	Control
110676061	Clostridium perfringens ATCC 13124	1.1.1.1	Alcohol dehydrogenase.	(1) An alcohol + NAD(+) = an aldehyde or ketone + NADH.(2) A secondary alcohol + NAD(+) = a ketone + NADH.	Autism
167660682	Alistipes putredinis DSM 17216	1.1.1.1	Alcohol dehydrogenase.	(1) An alcohol + NAD(+) = an aldehyde or ketone + NADH.(2) A secondary alcohol + NAD(+) = a ketone + NADH.	Control
115252745	Peptoclostridium difficile 630	1.1.1.1	Alcohol dehydrogenase.	(1) An alcohol + NAD(+) = an aldehyde or ketone + NADH.(2) A secondary alcohol + NAD(+) = a ketone + NADH.	Autism
167660682	Alistipes putredinis DSM 17216	1.1.1.1	Alcohol dehydrogenase.	(1) An alcohol + NAD(+) = an aldehyde or ketone + NADH.(2) A secondary alcohol + NAD(+) = a ketone + NADH.	Control
115252745	Peptoclostridium difficile 630	1.1.1.1	Alcohol dehydrogenase.	(1) An alcohol + NAD(+) = an aldehyde or ketone + NADH.(2) A secondary alcohol + NAD(+) = a ketone + NADH.	Autism
167660682	Alistipes putredinis DSM 17216	1.1.1.1	Alcohol dehydrogenase.	(1) An alcohol + NAD(+) = an aldehyde or ketone + NADH.(2) A secondary alcohol + NAD(+) = a ketone + NADH.	Control
115252745	Peptoclostridium difficile 630	1.1.1.1	Alcohol dehydrogenase.	(1) An alcohol + NAD(+) = an aldehyde or ketone + NADH.(2) A secondary alcohol + NAD(+) = a ketone + NADH.	Autism
167660682	Alistipes putredinis DSM 17216	1.1.1.1	Alcohol dehydrogenase.	(1) An alcohol + NAD(+) = an aldehyde or ketone + NADH.(2) A secondary alcohol + NAD(+) = a ketone + NADH.	Control
115252745	Peptoclostridium difficile 630	1.1.1.1	Alcohol dehydrogenase.	(1) An alcohol + NAD(+) = an aldehyde or ketone + NADH.(2) A secondary alcohol + NAD(+) = a ketone + NADH.	Autism
167660682	Alistipes putredinis DSM 17216	4.2.99.18	DNA-(apurinic or apyrimidinic site) lyase.	The C-O-P bond 3' to the apurinic or apyrimidinic site in DNA is brokenby a beta-elimination reaction, leaving a 3'-terminal unsaturated sugarand a product with a terminal 5'-phosphate.	Control
187426706	Akkermansia muciniphila ATCC BAA-835	4.2.99.18	DNA-(apurinic or apyrimidinic site) lyase.	The C-O-P bond 3' to the apurinic or apyrimidinic site in DNA is brokenby a beta-elimination reaction, leaving a 3'-terminal unsaturated sugarand a product with a terminal 5'-phosphate.	Autism
167660682	Alistipes putredinis DSM 17216	4.2.99.18	DNA-(apurinic or apyrimidinic site) lyase.	The C-O-P bond 3' to the apurinic or apyrimidinic site in DNA is brokenby a beta-elimination reaction, leaving a 3'-terminal unsaturated sugarand a product with a terminal 5'-phosphate.	Control
187426706	Akkermansia muciniphila ATCC BAA-835	4.2.99.18	DNA-(apurinic or apyrimidinic site) lyase.	The C-O-P bond 3' to the apurinic or apyrimidinic site in DNA is brokenby a beta-elimination reaction, leaving a 3'-terminal unsaturated sugarand a product with a terminal 5'-phosphate.	Autism
167660682	Alistipes putredinis DSM 17216	4.2.99.18	DNA-(apurinic or apyrimidinic site) lyase.	The C-O-P bond 3' to the apurinic or apyrimidinic site in DNA is brokenby a beta-elimination reaction, leaving a 3'-terminal unsaturated sugarand a product with a terminal 5'-phosphate.	Control
110676061	Clostridium perfringens ATCC 13124	4.2.99.18	DNA-(apurinic or apyrimidinic site) lyase.	The C-O-P bond 3' to the apurinic or apyrimidinic site in DNA is brokenby a beta-elimination reaction, leaving a 3'-terminal unsaturated sugarand a product with a terminal 5'-phosphate.	Autism
167660682	Alistipes putredinis DSM 17216	4.2.99.18	DNA-(apurinic or apyrimidinic site) lyase.	The C-O-P bond 3' to the apurinic or apyrimidinic site in DNA is brokenby a beta-elimination reaction, leaving a 3'-terminal unsaturated sugarand a product with a terminal 5'-phosphate.	Control
219869941	Desulfovibrio desulfuricans ATCC 27774	4.2.99.18	DNA-(apurinic or apyrimidinic site) lyase.	The C-O-P bond 3' to the apurinic or apyrimidinic site in DNA is brokenby a beta-elimination reaction, leaving a 3'-terminal unsaturated sugarand a product with a terminal 5'-phosphate.	Autism
167660682	Alistipes putredinis DSM 17216	4.2.99.18	DNA-(apurinic or apyrimidinic site) lyase.	The C-O-P bond 3' to the apurinic or apyrimidinic site in DNA is brokenby a beta-elimination reaction, leaving a 3'-terminal unsaturated sugarand a product with a terminal 5'-phosphate.	Control
115252745	Peptoclostridium difficile 630	4.2.99.18	DNA-(apurinic or apyrimidinic site) lyase.	The C-O-P bond 3' to the apurinic or apyrimidinic site in DNA is brokenby a beta-elimination reaction, leaving a 3'-terminal unsaturated sugarand a product with a terminal 5'-phosphate.	Autism
167660682	Alistipes putredinis DSM 17216	2.4.1.182	Lipid-A-disaccharide synthase.	UDP-2,3-bis(3-hydroxytetradecanoyl)glucosamine + 2,3-bis(3-hydroxytetradecanoyl)-beta-D-glucosaminyl 1-phosphate = UDP + 2,3-bis(3-hydroxytetradecanoyl)-D-glucosaminyl-1,6-beta-D-2,3-bis(3-hydroxytetradecanoyl)-beta-D-glucosaminyl 1-phosphate.	Control
187426706	Akkermansia muciniphila ATCC BAA-835	2.4.1.182	Lipid-A-disaccharide synthase.	UDP-2,3-bis(3-hydroxytetradecanoyl)glucosamine + 2,3-bis(3-hydroxytetradecanoyl)-beta-D-glucosaminyl 1-phosphate = UDP + 2,3-bis(3-hydroxytetradecanoyl)-D-glucosaminyl-1,6-beta-D-2,3-bis(3-hydroxytetradecanoyl)-beta-D-glucosaminyl 1-phosphate.	Autism
167660682	Alistipes putredinis DSM 17216	2.4.1.227	Undecaprenyldiphospho-muramoylpentapeptide beta-N-	UDP-N-acetylglucosamine + Mur2Ac(oyl-L-Ala-gamma-D-Glu-L-Lys-D-Ala-D-Ala)-diphosphoundecaprenol = UDP + GlcNAc-(1->4)-Mur2Ac(oyl-L-Ala-gamma-D-Glu-L-Lys-D-Ala-D-Ala)-diphosphoundecaprenol.	Control
187426706	Akkermansia muciniphila ATCC BAA-835	2.4.1.227	Undecaprenyldiphospho-muramoylpentapeptide beta-N-	UDP-N-acetylglucosamine + Mur2Ac(oyl-L-Ala-gamma-D-Glu-L-Lys-D-Ala-D-Ala)-diphosphoundecaprenol = UDP + GlcNAc-(1->4)-Mur2Ac(oyl-L-Ala-gamma-D-Glu-L-Lys-D-Ala-D-Ala)-diphosphoundecaprenol.	Autism
167660682	Alistipes putredinis DSM 17216	2.4.1.227	Undecaprenyldiphospho-muramoylpentapeptide beta-N-	UDP-N-acetylglucosamine + Mur2Ac(oyl-L-Ala-gamma-D-Glu-L-Lys-D-Ala-D-Ala)-diphosphoundecaprenol = UDP + GlcNAc-(1->4)-Mur2Ac(oyl-L-Ala-gamma-D-Glu-L-Lys-D-Ala-D-Ala)-diphosphoundecaprenol.	Control
110676061	Clostridium perfringens ATCC 13124	2.4.1.227	Undecaprenyldiphospho-muramoylpentapeptide beta-N-	UDP-N-acetylglucosamine + Mur2Ac(oyl-L-Ala-gamma-D-Glu-L-Lys-D-Ala-D-Ala)-diphosphoundecaprenol = UDP + GlcNAc-(1->4)-Mur2Ac(oyl-L-Ala-gamma-D-Glu-L-Lys-D-Ala-D-Ala)-diphosphoundecaprenol.	Autism
167660682	Alistipes putredinis DSM 17216	2.4.1.227	Undecaprenyldiphospho-muramoylpentapeptide beta-N-	UDP-N-acetylglucosamine + Mur2Ac(oyl-L-Ala-gamma-D-Glu-L-Lys-D-Ala-D-Ala)-diphosphoundecaprenol = UDP + GlcNAc-(1->4)-Mur2Ac(oyl-L-Ala-gamma-D-Glu-L-Lys-D-Ala-D-Ala)-diphosphoundecaprenol.	Control
219869941	Desulfovibrio desulfuricans ATCC 27774	2.4.1.227	Undecaprenyldiphospho-muramoylpentapeptide beta-N-	UDP-N-acetylglucosamine + Mur2Ac(oyl-L-Ala-gamma-D-Glu-L-Lys-D-Ala-D-Ala)-diphosphoundecaprenol = UDP + GlcNAc-(1->4)-Mur2Ac(oyl-L-Ala-gamma-D-Glu-L-Lys-D-Ala-D-Ala)-diphosphoundecaprenol.	Autism
167660682	Alistipes putredinis DSM 17216	2.4.1.227	Undecaprenyldiphospho-muramoylpentapeptide beta-N-	UDP-N-acetylglucosamine + Mur2Ac(oyl-L-Ala-gamma-D-Glu-L-Lys-D-Ala-D-Ala)-diphosphoundecaprenol = UDP + GlcNAc-(1->4)-Mur2Ac(oyl-L-Ala-gamma-D-Glu-L-Lys-D-Ala-D-Ala)-diphosphoundecaprenol.	Control
115252745	Peptoclostridium difficile 630	2.4.1.227	Undecaprenyldiphospho-muramoylpentapeptide beta-N-	UDP-N-acetylglucosamine + Mur2Ac(oyl-L-Ala-gamma-D-Glu-L-Lys-D-Ala-D-Ala)-diphosphoundecaprenol = UDP + GlcNAc-(1->4)-Mur2Ac(oyl-L-Ala-gamma-D-Glu-L-Lys-D-Ala-D-Ala)-diphosphoundecaprenol.	Autism
167660682	Alistipes putredinis DSM 17216	6.3.2.8	UDP-N-acetylmuramate--L-alanine ligase.	ATP + UDP-N-acetylmuramate + L-alanine = ADP + phosphate + UDP-N-acetylmuramoyl-L-alanine.	Control
110676061	Clostridium perfringens ATCC 13124	6.3.2.8	UDP-N-acetylmuramate--L-alanine ligase.	ATP + UDP-N-acetylmuramate + L-alanine = ADP + phosphate + UDP-N-acetylmuramoyl-L-alanine.	Autism
167660682	Alistipes putredinis DSM 17216	6.3.2.8	UDP-N-acetylmuramate--L-alanine ligase.	ATP + UDP-N-acetylmuramate + L-alanine = ADP + phosphate + UDP-N-acetylmuramoyl-L-alanine.	Control
115252745	Peptoclostridium difficile 630	6.3.2.8	UDP-N-acetylmuramate--L-alanine ligase.	ATP + UDP-N-acetylmuramate + L-alanine = ADP + phosphate + UDP-N-acetylmuramoyl-L-alanine.	Autism
167660682	Alistipes putredinis DSM 17216	5.99.1.2	DNA topoisomerase.	ATP-independent breakage of single-stranded DNA, followed by passage andrejoining.	Control
187426706	Akkermansia muciniphila ATCC BAA-835	5.99.1.2	DNA topoisomerase.	ATP-independent breakage of single-stranded DNA, followed by passage andrejoining.	Autism
167660682	Alistipes putredinis DSM 17216	5.99.1.2	DNA topoisomerase.	ATP-independent breakage of single-stranded DNA, followed by passage andrejoining.	Control
110676061	Clostridium perfringens ATCC 13124	5.99.1.2	DNA topoisomerase.	ATP-independent breakage of single-stranded DNA, followed by passage andrejoining.	Autism
167660682	Alistipes putredinis DSM 17216	5.99.1.2	DNA topoisomerase.	ATP-independent breakage of single-stranded DNA, followed by passage andrejoining.	Control
110676061	Clostridium perfringens ATCC 13124	5.99.1.2	DNA topoisomerase.	ATP-independent breakage of single-stranded DNA, followed by passage andrejoining.	Autism
167660682	Alistipes putredinis DSM 17216	5.99.1.2	DNA topoisomerase.	ATP-independent breakage of single-stranded DNA, followed by passage andrejoining.	Control
219869941	Desulfovibrio desulfuricans ATCC 27774	5.99.1.2	DNA topoisomerase.	ATP-independent breakage of single-stranded DNA, followed by passage andrejoining.	Autism
167660682	Alistipes putredinis DSM 17216	5.99.1.2	DNA topoisomerase.	ATP-independent breakage of single-stranded DNA, followed by passage andrejoining.	Control
115252745	Peptoclostridium difficile 630	5.99.1.2	DNA topoisomerase.	ATP-independent breakage of single-stranded DNA, followed by passage andrejoining.	Autism
167660682	Alistipes putredinis DSM 17216	5.99.1.2	DNA topoisomerase.	ATP-independent breakage of single-stranded DNA, followed by passage andrejoining.	Control
115252745	Peptoclostridium difficile 630	5.99.1.2	DNA topoisomerase.	ATP-independent breakage of single-stranded DNA, followed by passage andrejoining.	Autism
167660682	Alistipes putredinis DSM 17216	5.99.1.2	DNA topoisomerase.	ATP-independent breakage of single-stranded DNA, followed by passage andrejoining.	Control
115252745	Peptoclostridium difficile 630	5.99.1.2	DNA topoisomerase.	ATP-independent breakage of single-stranded DNA, followed by passage andrejoining.	Autism
167660682	Alistipes putredinis DSM 17216	5.99.1.2	DNA topoisomerase.	ATP-independent breakage of single-stranded DNA, followed by passage andrejoining.	Control
115252745	Peptoclostridium difficile 630	5.99.1.2	DNA topoisomerase.	ATP-independent breakage of single-stranded DNA, followed by passage andrejoining.	Autism
167660682	Alistipes putredinis DSM 17216	5.99.1.2	DNA topoisomerase.	ATP-independent breakage of single-stranded DNA, followed by passage andrejoining.	Control
115252745	Peptoclostridium difficile 630	5.99.1.2	DNA topoisomerase.	ATP-independent breakage of single-stranded DNA, followed by passage andrejoining.	Autism
167660682	Alistipes putredinis DSM 17216	5.1.1.7	Diaminopimelate epimerase.	LL-2,6-diaminoheptanedioate = meso-diaminoheptanedioate.	Control
187426706	Akkermansia muciniphila ATCC BAA-835	5.1.1.7	Diaminopimelate epimerase.	LL-2,6-diaminoheptanedioate = meso-diaminoheptanedioate.	Autism
167660682	Alistipes putredinis DSM 17216	5.1.1.7	Diaminopimelate epimerase.	LL-2,6-diaminoheptanedioate = meso-diaminoheptanedioate.	Control
110676061	Clostridium perfringens ATCC 13124	5.1.1.7	Diaminopimelate epimerase.	LL-2,6-diaminoheptanedioate = meso-diaminoheptanedioate.	Autism
167660682	Alistipes putredinis DSM 17216	5.1.1.7	Diaminopimelate epimerase.	LL-2,6-diaminoheptanedioate = meso-diaminoheptanedioate.	Control
219869941	Desulfovibrio desulfuricans ATCC 27774	5.1.1.7	Diaminopimelate epimerase.	LL-2,6-diaminoheptanedioate = meso-diaminoheptanedioate.	Autism
167660682	Alistipes putredinis DSM 17216	5.1.1.7	Diaminopimelate epimerase.	LL-2,6-diaminoheptanedioate = meso-diaminoheptanedioate.	Control
115252745	Peptoclostridium difficile 630	5.1.1.7	Diaminopimelate epimerase.	LL-2,6-diaminoheptanedioate = meso-diaminoheptanedioate.	Autism
167660682	Alistipes putredinis DSM 17216	2.5.1.31	Ditrans,polycis-undecaprenyl-diphosphate synthase ((2E,6E)-farnesyl-	(2E,6E)-farnesyl diphosphate + 8 isopentenyl diphosphate = 8 diphosphate+ di-trans,octa-cis-undecaprenyl diphosphate.	Control
187426706	Akkermansia muciniphila ATCC BAA-835	2.5.1.31	Ditrans,polycis-undecaprenyl-diphosphate synthase ((2E,6E)-farnesyl-	(2E,6E)-farnesyl diphosphate + 8 isopentenyl diphosphate = 8 diphosphate+ di-trans,octa-cis-undecaprenyl diphosphate.	Autism
167660682	Alistipes putredinis DSM 17216	2.5.1.31	Ditrans,polycis-undecaprenyl-diphosphate synthase ((2E,6E)-farnesyl-	(2E,6E)-farnesyl diphosphate + 8 isopentenyl diphosphate = 8 diphosphate+ di-trans,octa-cis-undecaprenyl diphosphate.	Control
110676061	Clostridium perfringens ATCC 13124	2.5.1.31	Ditrans,polycis-undecaprenyl-diphosphate synthase ((2E,6E)-farnesyl-	(2E,6E)-farnesyl diphosphate + 8 isopentenyl diphosphate = 8 diphosphate+ di-trans,octa-cis-undecaprenyl diphosphate.	Autism
167660682	Alistipes putredinis DSM 17216	2.5.1.31	Ditrans,polycis-undecaprenyl-diphosphate synthase ((2E,6E)-farnesyl-	(2E,6E)-farnesyl diphosphate + 8 isopentenyl diphosphate = 8 diphosphate+ di-trans,octa-cis-undecaprenyl diphosphate.	Control
219869941	Desulfovibrio desulfuricans ATCC 27774	2.5.1.31	Ditrans,polycis-undecaprenyl-diphosphate synthase ((2E,6E)-farnesyl-	(2E,6E)-farnesyl diphosphate + 8 isopentenyl diphosphate = 8 diphosphate+ di-trans,octa-cis-undecaprenyl diphosphate.	Autism
167660682	Alistipes putredinis DSM 17216	2.5.1.31	Ditrans,polycis-undecaprenyl-diphosphate synthase ((2E,6E)-farnesyl-	(2E,6E)-farnesyl diphosphate + 8 isopentenyl diphosphate = 8 diphosphate+ di-trans,octa-cis-undecaprenyl diphosphate.	Control
115252745	Peptoclostridium difficile 630	2.5.1.31	Ditrans,polycis-undecaprenyl-diphosphate synthase ((2E,6E)-farnesyl-	(2E,6E)-farnesyl diphosphate + 8 isopentenyl diphosphate = 8 diphosphate+ di-trans,octa-cis-undecaprenyl diphosphate.	Autism
167660682	Alistipes putredinis DSM 17216	2.5.1.31	Ditrans,polycis-undecaprenyl-diphosphate synthase ((2E,6E)-farnesyl-	(2E,6E)-farnesyl diphosphate + 8 isopentenyl diphosphate = 8 diphosphate+ di-trans,octa-cis-undecaprenyl diphosphate.	Control
115252745	Peptoclostridium difficile 630	2.5.1.31	Ditrans,polycis-undecaprenyl-diphosphate synthase ((2E,6E)-farnesyl-	(2E,6E)-farnesyl diphosphate + 8 isopentenyl diphosphate = 8 diphosphate+ di-trans,octa-cis-undecaprenyl diphosphate.	Autism
167660682	Alistipes putredinis DSM 17216	6.1.1.3	Threonine--tRNA ligase.	ATP + L-threonine + tRNA(Thr) = AMP + diphosphate + L-threonyl-tRNA(Thr).	Control
110676061	Clostridium perfringens ATCC 13124	6.1.1.3	Threonine--tRNA ligase.	ATP + L-threonine + tRNA(Thr) = AMP + diphosphate + L-threonyl-tRNA(Thr).	Autism
167660682	Alistipes putredinis DSM 17216	6.1.1.3	Threonine--tRNA ligase.	ATP + L-threonine + tRNA(Thr) = AMP + diphosphate + L-threonyl-tRNA(Thr).	Control
115252745	Peptoclostridium difficile 630	6.1.1.3	Threonine--tRNA ligase.	ATP + L-threonine + tRNA(Thr) = AMP + diphosphate + L-threonyl-tRNA(Thr).	Autism
167660682	Alistipes putredinis DSM 17216	1.1.1.262	4-hydroxythreonine-4-phosphate dehydrogenase.	4-phosphonooxy-L-threonine + NAD(+) = 3-amino-2-oxopropyl phosphate +CO(2) + NADH.	Control
187426706	Akkermansia muciniphila ATCC BAA-835	1.1.1.262	4-hydroxythreonine-4-phosphate dehydrogenase.	4-phosphonooxy-L-threonine + NAD(+) = 3-amino-2-oxopropyl phosphate +CO(2) + NADH.	Autism
167660682	Alistipes putredinis DSM 17216	1.8.1.9	Thioredoxin-disulfide reductase.	Thioredoxin + NADP(+) = thioredoxin disulfide + NADPH.	Control
110676061	Clostridium perfringens ATCC 13124	1.8.1.9	Thioredoxin-disulfide reductase.	Thioredoxin + NADP(+) = thioredoxin disulfide + NADPH.	Autism
167660682	Alistipes putredinis DSM 17216	1.8.1.9	Thioredoxin-disulfide reductase.	Thioredoxin + NADP(+) = thioredoxin disulfide + NADPH.	Control
219869941	Desulfovibrio desulfuricans ATCC 27774	1.8.1.9	Thioredoxin-disulfide reductase.	Thioredoxin + NADP(+) = thioredoxin disulfide + NADPH.	Autism
167660682	Alistipes putredinis DSM 17216	1.8.1.9	Thioredoxin-disulfide reductase.	Thioredoxin + NADP(+) = thioredoxin disulfide + NADPH.	Control
115252745	Peptoclostridium difficile 630	1.8.1.9	Thioredoxin-disulfide reductase.	Thioredoxin + NADP(+) = thioredoxin disulfide + NADPH.	Autism
167660682	Alistipes putredinis DSM 17216	1.8.1.9	Thioredoxin-disulfide reductase.	Thioredoxin + NADP(+) = thioredoxin disulfide + NADPH.	Control
115252745	Peptoclostridium difficile 630	1.8.1.9	Thioredoxin-disulfide reductase.	Thioredoxin + NADP(+) = thioredoxin disulfide + NADPH.	Autism
167660682	Alistipes putredinis DSM 17216	1.8.1.9	Thioredoxin-disulfide reductase.	Thioredoxin + NADP(+) = thioredoxin disulfide + NADPH.	Control
115252745	Peptoclostridium difficile 630	1.8.1.9	Thioredoxin-disulfide reductase.	Thioredoxin + NADP(+) = thioredoxin disulfide + NADPH.	Autism
167660682	Alistipes putredinis DSM 17216	1.4.4.2	Glycine dehydrogenase (aminomethyl-transferring).	Glycine + [glycine-cleavage complex H protein]-N(6)-lipoyl-L-lysine =[glycine-cleavage complex H protein]-S-aminomethyl-N(6)-dihydrolipoyl-L-lysine + CO(2).	Control
219869941	Desulfovibrio desulfuricans ATCC 27774	1.4.4.2	Glycine dehydrogenase (aminomethyl-transferring).	Glycine + [glycine-cleavage complex H protein]-N(6)-lipoyl-L-lysine =[glycine-cleavage complex H protein]-S-aminomethyl-N(6)-dihydrolipoyl-L-lysine + CO(2).	Autism
167660682	Alistipes putredinis DSM 17216	1.4.4.2	Glycine dehydrogenase (aminomethyl-transferring).	Glycine + [glycine-cleavage complex H protein]-N(6)-lipoyl-L-lysine =[glycine-cleavage complex H protein]-S-aminomethyl-N(6)-dihydrolipoyl-L-lysine + CO(2).	Control
219869941	Desulfovibrio desulfuricans ATCC 27774	1.4.4.2	Glycine dehydrogenase (aminomethyl-transferring).	Glycine + [glycine-cleavage complex H protein]-N(6)-lipoyl-L-lysine =[glycine-cleavage complex H protein]-S-aminomethyl-N(6)-dihydrolipoyl-L-lysine + CO(2).	Autism
167660682	Alistipes putredinis DSM 17216	1.4.4.2	Glycine dehydrogenase (aminomethyl-transferring).	Glycine + [glycine-cleavage complex H protein]-N(6)-lipoyl-L-lysine =[glycine-cleavage complex H protein]-S-aminomethyl-N(6)-dihydrolipoyl-L-lysine + CO(2).	Control
115252745	Peptoclostridium difficile 630	1.4.4.2	Glycine dehydrogenase (aminomethyl-transferring).	Glycine + [glycine-cleavage complex H protein]-N(6)-lipoyl-L-lysine =[glycine-cleavage complex H protein]-S-aminomethyl-N(6)-dihydrolipoyl-L-lysine + CO(2).	Autism
167660682	Alistipes putredinis DSM 17216	1.4.4.2	Glycine dehydrogenase (aminomethyl-transferring).	Glycine + [glycine-cleavage complex H protein]-N(6)-lipoyl-L-lysine =[glycine-cleavage complex H protein]-S-aminomethyl-N(6)-dihydrolipoyl-L-lysine + CO(2).	Control
115252745	Peptoclostridium difficile 630	1.4.4.2	Glycine dehydrogenase (aminomethyl-transferring).	Glycine + [glycine-cleavage complex H protein]-N(6)-lipoyl-L-lysine =[glycine-cleavage complex H protein]-S-aminomethyl-N(6)-dihydrolipoyl-L-lysine + CO(2).	Autism
167660682	Alistipes putredinis DSM 17216	4.1.99.12	3,4-dihydroxy-2-butanone-4-phosphate synthase.	D-ribulose 5-phosphate = formate + L-3,4-dihydroxybutan-2-one4-phosphate.	Control
115252745	Peptoclostridium difficile 630	4.1.99.12	3,4-dihydroxy-2-butanone-4-phosphate synthase.	D-ribulose 5-phosphate = formate + L-3,4-dihydroxybutan-2-one4-phosphate.	Autism
167660682	Alistipes putredinis DSM 17216	2.1.1.63	Methylated-DNA--[protein]-cysteine S-methyltransferase.	DNA (containing 6-O-methylguanine) + protein L-cysteine = DNA (without6-O-methylguanine) + protein S-methyl-L-cysteine.	Control
187426706	Akkermansia muciniphila ATCC BAA-835	2.1.1.63	Methylated-DNA--[protein]-cysteine S-methyltransferase.	DNA (containing 6-O-methylguanine) + protein L-cysteine = DNA (without6-O-methylguanine) + protein S-methyl-L-cysteine.	Autism
167660682	Alistipes putredinis DSM 17216	2.1.1.63	Methylated-DNA--[protein]-cysteine S-methyltransferase.	DNA (containing 6-O-methylguanine) + protein L-cysteine = DNA (without6-O-methylguanine) + protein S-methyl-L-cysteine.	Control
187426706	Akkermansia muciniphila ATCC BAA-835	2.1.1.63	Methylated-DNA--[protein]-cysteine S-methyltransferase.	DNA (containing 6-O-methylguanine) + protein L-cysteine = DNA (without6-O-methylguanine) + protein S-methyl-L-cysteine.	Autism
167660682	Alistipes putredinis DSM 17216	2.1.1.63	Methylated-DNA--[protein]-cysteine S-methyltransferase.	DNA (containing 6-O-methylguanine) + protein L-cysteine = DNA (without6-O-methylguanine) + protein S-methyl-L-cysteine.	Control
110676061	Clostridium perfringens ATCC 13124	2.1.1.63	Methylated-DNA--[protein]-cysteine S-methyltransferase.	DNA (containing 6-O-methylguanine) + protein L-cysteine = DNA (without6-O-methylguanine) + protein S-methyl-L-cysteine.	Autism
167660682	Alistipes putredinis DSM 17216	2.1.1.63	Methylated-DNA--[protein]-cysteine S-methyltransferase.	DNA (containing 6-O-methylguanine) + protein L-cysteine = DNA (without6-O-methylguanine) + protein S-methyl-L-cysteine.	Control
219869941	Desulfovibrio desulfuricans ATCC 27774	2.1.1.63	Methylated-DNA--[protein]-cysteine S-methyltransferase.	DNA (containing 6-O-methylguanine) + protein L-cysteine = DNA (without6-O-methylguanine) + protein S-methyl-L-cysteine.	Autism
167660682	Alistipes putredinis DSM 17216	2.1.1.63	Methylated-DNA--[protein]-cysteine S-methyltransferase.	DNA (containing 6-O-methylguanine) + protein L-cysteine = DNA (without6-O-methylguanine) + protein S-methyl-L-cysteine.	Control
219869941	Desulfovibrio desulfuricans ATCC 27774	2.1.1.63	Methylated-DNA--[protein]-cysteine S-methyltransferase.	DNA (containing 6-O-methylguanine) + protein L-cysteine = DNA (without6-O-methylguanine) + protein S-methyl-L-cysteine.	Autism
167660682	Alistipes putredinis DSM 17216	2.1.1.63	Methylated-DNA--[protein]-cysteine S-methyltransferase.	DNA (containing 6-O-methylguanine) + protein L-cysteine = DNA (without6-O-methylguanine) + protein S-methyl-L-cysteine.	Control
115252745	Peptoclostridium difficile 630	2.1.1.63	Methylated-DNA--[protein]-cysteine S-methyltransferase.	DNA (containing 6-O-methylguanine) + protein L-cysteine = DNA (without6-O-methylguanine) + protein S-methyl-L-cysteine.	Autism
167660682	Alistipes putredinis DSM 17216	2.1.1.63	Methylated-DNA--[protein]-cysteine S-methyltransferase.	DNA (containing 6-O-methylguanine) + protein L-cysteine = DNA (without6-O-methylguanine) + protein S-methyl-L-cysteine.	Control
115252745	Peptoclostridium difficile 630	2.1.1.63	Methylated-DNA--[protein]-cysteine S-methyltransferase.	DNA (containing 6-O-methylguanine) + protein L-cysteine = DNA (without6-O-methylguanine) + protein S-methyl-L-cysteine.	Autism
167660682	Alistipes putredinis DSM 17216	2.1.1.63	Methylated-DNA--[protein]-cysteine S-methyltransferase.	DNA (containing 6-O-methylguanine) + protein L-cysteine = DNA (without6-O-methylguanine) + protein S-methyl-L-cysteine.	Control
115252745	Peptoclostridium difficile 630	2.1.1.63	Methylated-DNA--[protein]-cysteine S-methyltransferase.	DNA (containing 6-O-methylguanine) + protein L-cysteine = DNA (without6-O-methylguanine) + protein S-methyl-L-cysteine.	Autism
167660682	Alistipes putredinis DSM 17216	6.1.1.4	Leucine--tRNA ligase.	ATP + L-leucine + tRNA(Leu) = AMP + diphosphate + L-leucyl-tRNA(Leu).	Control
110676061	Clostridium perfringens ATCC 13124	6.1.1.4	Leucine--tRNA ligase.	ATP + L-leucine + tRNA(Leu) = AMP + diphosphate + L-leucyl-tRNA(Leu).	Autism
167660682	Alistipes putredinis DSM 17216	6.1.1.4	Leucine--tRNA ligase.	ATP + L-leucine + tRNA(Leu) = AMP + diphosphate + L-leucyl-tRNA(Leu).	Control
115252745	Peptoclostridium difficile 630	6.1.1.4	Leucine--tRNA ligase.	ATP + L-leucine + tRNA(Leu) = AMP + diphosphate + L-leucyl-tRNA(Leu).	Autism
167660682	Alistipes putredinis DSM 17216	3.4.11.18	Methionyl aminopeptidase.	Release of N-terminal amino acids, preferentially methionine, frompeptides and arylamides.	Control
187426706	Akkermansia muciniphila ATCC BAA-835	3.4.11.18	Methionyl aminopeptidase.	Release of N-terminal amino acids, preferentially methionine, frompeptides and arylamides.	Autism
167660682	Alistipes putredinis DSM 17216	3.4.11.18	Methionyl aminopeptidase.	Release of N-terminal amino acids, preferentially methionine, frompeptides and arylamides.	Control
110676061	Clostridium perfringens ATCC 13124	3.4.11.18	Methionyl aminopeptidase.	Release of N-terminal amino acids, preferentially methionine, frompeptides and arylamides.	Autism
167660682	Alistipes putredinis DSM 17216	3.4.11.18	Methionyl aminopeptidase.	Release of N-terminal amino acids, preferentially methionine, frompeptides and arylamides.	Control
110676061	Clostridium perfringens ATCC 13124	3.4.11.18	Methionyl aminopeptidase.	Release of N-terminal amino acids, preferentially methionine, frompeptides and arylamides.	Autism
167660682	Alistipes putredinis DSM 17216	3.4.11.18	Methionyl aminopeptidase.	Release of N-terminal amino acids, preferentially methionine, frompeptides and arylamides.	Control
115252745	Peptoclostridium difficile 630	3.4.11.18	Methionyl aminopeptidase.	Release of N-terminal amino acids, preferentially methionine, frompeptides and arylamides.	Autism
167660682	Alistipes putredinis DSM 17216	3.4.11.18	Methionyl aminopeptidase.	Release of N-terminal amino acids, preferentially methionine, frompeptides and arylamides.	Control
115252745	Peptoclostridium difficile 630	3.4.11.18	Methionyl aminopeptidase.	Release of N-terminal amino acids, preferentially methionine, frompeptides and arylamides.	Autism
167660682	Alistipes putredinis DSM 17216	2.7.7.6	DNA-directed RNA polymerase.	Nucleoside triphosphate + RNA(n) = diphosphate + RNA(n+1).	Control
110676061	Clostridium perfringens ATCC 13124	2.7.7.6	DNA-directed RNA polymerase.	Nucleoside triphosphate + RNA(n) = diphosphate + RNA(n+1).	Autism
167660682	Alistipes putredinis DSM 17216	2.7.7.6	DNA-directed RNA polymerase.	Nucleoside triphosphate + RNA(n) = diphosphate + RNA(n+1).	Control
110676061	Clostridium perfringens ATCC 13124	2.7.7.6	DNA-directed RNA polymerase.	Nucleoside triphosphate + RNA(n) = diphosphate + RNA(n+1).	Autism
167660682	Alistipes putredinis DSM 17216	2.7.7.6	DNA-directed RNA polymerase.	Nucleoside triphosphate + RNA(n) = diphosphate + RNA(n+1).	Control
110676061	Clostridium perfringens ATCC 13124	2.7.7.6	DNA-directed RNA polymerase.	Nucleoside triphosphate + RNA(n) = diphosphate + RNA(n+1).	Autism
167660682	Alistipes putredinis DSM 17216	2.7.7.6	DNA-directed RNA polymerase.	Nucleoside triphosphate + RNA(n) = diphosphate + RNA(n+1).	Control
110676061	Clostridium perfringens ATCC 13124	2.7.7.6	DNA-directed RNA polymerase.	Nucleoside triphosphate + RNA(n) = diphosphate + RNA(n+1).	Autism
167660682	Alistipes putredinis DSM 17216	2.7.7.6	DNA-directed RNA polymerase.	Nucleoside triphosphate + RNA(n) = diphosphate + RNA(n+1).	Control
115252745	Peptoclostridium difficile 630	2.7.7.6	DNA-directed RNA polymerase.	Nucleoside triphosphate + RNA(n) = diphosphate + RNA(n+1).	Autism
167660682	Alistipes putredinis DSM 17216	2.7.7.6	DNA-directed RNA polymerase.	Nucleoside triphosphate + RNA(n) = diphosphate + RNA(n+1).	Control
115252745	Peptoclostridium difficile 630	2.7.7.6	DNA-directed RNA polymerase.	Nucleoside triphosphate + RNA(n) = diphosphate + RNA(n+1).	Autism
167660682	Alistipes putredinis DSM 17216	2.7.7.6	DNA-directed RNA polymerase.	Nucleoside triphosphate + RNA(n) = diphosphate + RNA(n+1).	Control
115252745	Peptoclostridium difficile 630	2.7.7.6	DNA-directed RNA polymerase.	Nucleoside triphosphate + RNA(n) = diphosphate + RNA(n+1).	Autism
167660682	Alistipes putredinis DSM 17216	2.7.7.6	DNA-directed RNA polymerase.	Nucleoside triphosphate + RNA(n) = diphosphate + RNA(n+1).	Control
115252745	Peptoclostridium difficile 630	2.7.7.6	DNA-directed RNA polymerase.	Nucleoside triphosphate + RNA(n) = diphosphate + RNA(n+1).	Autism
167660682	Alistipes putredinis DSM 17216	2.7.7.6	DNA-directed RNA polymerase.	Nucleoside triphosphate + RNA(n) = diphosphate + RNA(n+1).	Control
115252745	Peptoclostridium difficile 630	2.7.7.6	DNA-directed RNA polymerase.	Nucleoside triphosphate + RNA(n) = diphosphate + RNA(n+1).	Autism
167660682	Alistipes putredinis DSM 17216	5.3.1.1	Triose-phosphate isomerase.	D-glyceraldehyde 3-phosphate = glycerone phosphate.	Control
187426706	Akkermansia muciniphila ATCC BAA-835	5.3.1.1	Triose-phosphate isomerase.	D-glyceraldehyde 3-phosphate = glycerone phosphate.	Autism
167660682	Alistipes putredinis DSM 17216	5.3.1.1	Triose-phosphate isomerase.	D-glyceraldehyde 3-phosphate = glycerone phosphate.	Control
110676061	Clostridium perfringens ATCC 13124	5.3.1.1	Triose-phosphate isomerase.	D-glyceraldehyde 3-phosphate = glycerone phosphate.	Autism
167660682	Alistipes putredinis DSM 17216	5.3.1.1	Triose-phosphate isomerase.	D-glyceraldehyde 3-phosphate = glycerone phosphate.	Control
219869941	Desulfovibrio desulfuricans ATCC 27774	5.3.1.1	Triose-phosphate isomerase.	D-glyceraldehyde 3-phosphate = glycerone phosphate.	Autism
167660682	Alistipes putredinis DSM 17216	5.3.1.1	Triose-phosphate isomerase.	D-glyceraldehyde 3-phosphate = glycerone phosphate.	Control
115252745	Peptoclostridium difficile 630	5.3.1.1	Triose-phosphate isomerase.	D-glyceraldehyde 3-phosphate = glycerone phosphate.	Autism
291516108	Alistipes shahii WAL 8301	3.2.1.22	Alpha-galactosidase.	Hydrolysis of terminal, non-reducing alpha-D-galactose residues in alpha-D-galactosides, including galactose oligosaccharides, galactomannans andgalactolipids.	Control
187426706	Akkermansia muciniphila ATCC BAA-835	3.2.1.22	Alpha-galactosidase.	Hydrolysis of terminal, non-reducing alpha-D-galactose residues in alpha-D-galactosides, including galactose oligosaccharides, galactomannans andgalactolipids.	Autism
291516108	Alistipes shahii WAL 8301	3.2.1.22	Alpha-galactosidase.	Hydrolysis of terminal, non-reducing alpha-D-galactose residues in alpha-D-galactosides, including galactose oligosaccharides, galactomannans andgalactolipids.	Control
110676061	Clostridium perfringens ATCC 13124	3.2.1.22	Alpha-galactosidase.	Hydrolysis of terminal, non-reducing alpha-D-galactose residues in alpha-D-galactosides, including galactose oligosaccharides, galactomannans andgalactolipids.	Autism
291516108	Alistipes shahii WAL 8301	3.2.1.20	Alpha-glucosidase.	Hydrolysis of terminal, non-reducing (1->4)-linked alpha-D-glucoseresidues with release of alpha-D-glucose.	Control
187426706	Akkermansia muciniphila ATCC BAA-835	3.2.1.20	Alpha-glucosidase.	Hydrolysis of terminal, non-reducing (1->4)-linked alpha-D-glucoseresidues with release of alpha-D-glucose.	Autism
291516108	Alistipes shahii WAL 8301	3.2.1.20	Alpha-glucosidase.	Hydrolysis of terminal, non-reducing (1->4)-linked alpha-D-glucoseresidues with release of alpha-D-glucose.	Control
110676061	Clostridium perfringens ATCC 13124	3.2.1.20	Alpha-glucosidase.	Hydrolysis of terminal, non-reducing (1->4)-linked alpha-D-glucoseresidues with release of alpha-D-glucose.	Autism
291516108	Alistipes shahii WAL 8301	2.4.1.25	4-alpha-glucanotransferase.	Transfers a segment of a (1->4)-alpha-D-glucan to a new position in anacceptor, which may be glucose or a (1->4)-alpha-D-glucan.	Control
187426706	Akkermansia muciniphila ATCC BAA-835	2.4.1.25	4-alpha-glucanotransferase.	Transfers a segment of a (1->4)-alpha-D-glucan to a new position in anacceptor, which may be glucose or a (1->4)-alpha-D-glucan.	Autism
291516108	Alistipes shahii WAL 8301	2.4.1.25	4-alpha-glucanotransferase.	Transfers a segment of a (1->4)-alpha-D-glucan to a new position in anacceptor, which may be glucose or a (1->4)-alpha-D-glucan.	Control
110676061	Clostridium perfringens ATCC 13124	2.4.1.25	4-alpha-glucanotransferase.	Transfers a segment of a (1->4)-alpha-D-glucan to a new position in anacceptor, which may be glucose or a (1->4)-alpha-D-glucan.	Autism
291516108	Alistipes shahii WAL 8301	3.4.23.36	Signal peptidase II.	Release of signal peptides from bacterial membrane prolipoproteins.Hydrolyzes -Xaa-Yaa-Zaa-|-(S,diacylglyceryl)Cys-, in which Xaa ishydrophobic (preferably Leu), and Yaa (Ala or Ser) and Zaa (Gly or Ala)have small, neutral side chains.	Control
219869941	Desulfovibrio desulfuricans ATCC 27774	3.4.23.36	Signal peptidase II.	Release of signal peptides from bacterial membrane prolipoproteins.Hydrolyzes -Xaa-Yaa-Zaa-|-(S,diacylglyceryl)Cys-, in which Xaa ishydrophobic (preferably Leu), and Yaa (Ala or Ser) and Zaa (Gly or Ala)have small, neutral side chains.	Autism
291516108	Alistipes shahii WAL 8301	3.4.23.36	Signal peptidase II.	Release of signal peptides from bacterial membrane prolipoproteins.Hydrolyzes -Xaa-Yaa-Zaa-|-(S,diacylglyceryl)Cys-, in which Xaa ishydrophobic (preferably Leu), and Yaa (Ala or Ser) and Zaa (Gly or Ala)have small, neutral side chains.	Control
115252745	Peptoclostridium difficile 630	3.4.23.36	Signal peptidase II.	Release of signal peptides from bacterial membrane prolipoproteins.Hydrolyzes -Xaa-Yaa-Zaa-|-(S,diacylglyceryl)Cys-, in which Xaa ishydrophobic (preferably Leu), and Yaa (Ala or Ser) and Zaa (Gly or Ala)have small, neutral side chains.	Autism
291516108	Alistipes shahii WAL 8301	2.3.1.129	Acyl-[acyl-carrier-protein]--UDP-N-acetylglucosamine O-acyltransferase.	(R)-3-hydroxytetradecanoyl-[acyl-carrier-protein] + UDP-N-acetyl-alpha-D-glucosamine = [acyl-carrier-protein] + UDP-3-O-(3-hydroxytetradecanoyl)-N-acetyl-alpha-D-glucosamine.	Control
187426706	Akkermansia muciniphila ATCC BAA-835	2.3.1.129	Acyl-[acyl-carrier-protein]--UDP-N-acetylglucosamine O-acyltransferase.	(R)-3-hydroxytetradecanoyl-[acyl-carrier-protein] + UDP-N-acetyl-alpha-D-glucosamine = [acyl-carrier-protein] + UDP-3-O-(3-hydroxytetradecanoyl)-N-acetyl-alpha-D-glucosamine.	Autism
291516108	Alistipes shahii WAL 8301	5.3.1.17	5-dehydro-4-deoxy-D-glucuronate isomerase.	5-dehydro-4-deoxy-D-glucuronate = 3-deoxy-D-glycero-2,5-hexodiulosonate.	Control
110676061	Clostridium perfringens ATCC 13124	5.3.1.17	5-dehydro-4-deoxy-D-glucuronate isomerase.	5-dehydro-4-deoxy-D-glucuronate = 3-deoxy-D-glycero-2,5-hexodiulosonate.	Autism
291516108	Alistipes shahii WAL 8301	5.3.1.17	5-dehydro-4-deoxy-D-glucuronate isomerase.	5-dehydro-4-deoxy-D-glucuronate = 3-deoxy-D-glycero-2,5-hexodiulosonate.	Control
110676061	Clostridium perfringens ATCC 13124	5.3.1.17	5-dehydro-4-deoxy-D-glucuronate isomerase.	5-dehydro-4-deoxy-D-glucuronate = 3-deoxy-D-glycero-2,5-hexodiulosonate.	Autism
291516108	Alistipes shahii WAL 8301	3.4.24.57	O-sialoglycoprotein endopeptidase.	Hydrolysis of O-sialoglycoproteins; cleaves 31-Arg-|-Asp-32 bond inglycophorin A. Does not cleave unglycosylated proteins, desialylatedglycoproteins or glycoproteins that are only N-glycosylated.	Control
187426706	Akkermansia muciniphila ATCC BAA-835	3.4.24.57	O-sialoglycoprotein endopeptidase.	Hydrolysis of O-sialoglycoproteins; cleaves 31-Arg-|-Asp-32 bond inglycophorin A. Does not cleave unglycosylated proteins, desialylatedglycoproteins or glycoproteins that are only N-glycosylated.	Autism
291516108	Alistipes shahii WAL 8301	3.4.24.57	O-sialoglycoprotein endopeptidase.	Hydrolysis of O-sialoglycoproteins; cleaves 31-Arg-|-Asp-32 bond inglycophorin A. Does not cleave unglycosylated proteins, desialylatedglycoproteins or glycoproteins that are only N-glycosylated.	Control
110676061	Clostridium perfringens ATCC 13124	3.4.24.57	O-sialoglycoprotein endopeptidase.	Hydrolysis of O-sialoglycoproteins; cleaves 31-Arg-|-Asp-32 bond inglycophorin A. Does not cleave unglycosylated proteins, desialylatedglycoproteins or glycoproteins that are only N-glycosylated.	Autism
291516108	Alistipes shahii WAL 8301	3.4.24.57	O-sialoglycoprotein endopeptidase.	Hydrolysis of O-sialoglycoproteins; cleaves 31-Arg-|-Asp-32 bond inglycophorin A. Does not cleave unglycosylated proteins, desialylatedglycoproteins or glycoproteins that are only N-glycosylated.	Control
219869941	Desulfovibrio desulfuricans ATCC 27774	3.4.24.57	O-sialoglycoprotein endopeptidase.	Hydrolysis of O-sialoglycoproteins; cleaves 31-Arg-|-Asp-32 bond inglycophorin A. Does not cleave unglycosylated proteins, desialylatedglycoproteins or glycoproteins that are only N-glycosylated.	Autism
291516108	Alistipes shahii WAL 8301	3.4.24.57	O-sialoglycoprotein endopeptidase.	Hydrolysis of O-sialoglycoproteins; cleaves 31-Arg-|-Asp-32 bond inglycophorin A. Does not cleave unglycosylated proteins, desialylatedglycoproteins or glycoproteins that are only N-glycosylated.	Control
115252745	Peptoclostridium difficile 630	3.4.24.57	O-sialoglycoprotein endopeptidase.	Hydrolysis of O-sialoglycoproteins; cleaves 31-Arg-|-Asp-32 bond inglycophorin A. Does not cleave unglycosylated proteins, desialylatedglycoproteins or glycoproteins that are only N-glycosylated.	Autism
291516108	Alistipes shahii WAL 8301	3.4.24.57	O-sialoglycoprotein endopeptidase.	Hydrolysis of O-sialoglycoproteins; cleaves 31-Arg-|-Asp-32 bond inglycophorin A. Does not cleave unglycosylated proteins, desialylatedglycoproteins or glycoproteins that are only N-glycosylated.	Control
115252745	Peptoclostridium difficile 630	3.4.24.57	O-sialoglycoprotein endopeptidase.	Hydrolysis of O-sialoglycoproteins; cleaves 31-Arg-|-Asp-32 bond inglycophorin A. Does not cleave unglycosylated proteins, desialylatedglycoproteins or glycoproteins that are only N-glycosylated.	Autism
291516108	Alistipes shahii WAL 8301	1.11.1.15	Peroxiredoxin.	2 R'-SH + ROOH = R'-S-S-R' + H(2)O + ROH.	Control
110676061	Clostridium perfringens ATCC 13124	1.11.1.15	Peroxiredoxin.	2 R'-SH + ROOH = R'-S-S-R' + H(2)O + ROH.	Autism
291516108	Alistipes shahii WAL 8301	1.11.1.15	Peroxiredoxin.	2 R'-SH + ROOH = R'-S-S-R' + H(2)O + ROH.	Control
115252745	Peptoclostridium difficile 630	1.11.1.15	Peroxiredoxin.	2 R'-SH + ROOH = R'-S-S-R' + H(2)O + ROH.	Autism
291516108	Alistipes shahii WAL 8301	1.11.1.15	Peroxiredoxin.	2 R'-SH + ROOH = R'-S-S-R' + H(2)O + ROH.	Control
115252745	Peptoclostridium difficile 630	1.11.1.15	Peroxiredoxin.	2 R'-SH + ROOH = R'-S-S-R' + H(2)O + ROH.	Autism
291516108	Alistipes shahii WAL 8301	1.11.1.5	Cytochrome-c peroxidase.	2 ferrocytochrome c + H(2)O(2) = 2 ferricytochrome c + 2 H(2)O.	Control
187426706	Akkermansia muciniphila ATCC BAA-835	1.11.1.5	Cytochrome-c peroxidase.	2 ferrocytochrome c + H(2)O(2) = 2 ferricytochrome c + 2 H(2)O.	Autism
291516108	Alistipes shahii WAL 8301	2.4.1.18	1,4-alpha-glucan branching enzyme.	Transfers a segment of a (1->4)-alpha-D-glucan chain to a primary hydroxygroup in a similar glucan chain.	Control
110676061	Clostridium perfringens ATCC 13124	2.4.1.18	1,4-alpha-glucan branching enzyme.	Transfers a segment of a (1->4)-alpha-D-glucan chain to a primary hydroxygroup in a similar glucan chain.	Autism
291516108	Alistipes shahii WAL 8301	2.4.1.18	1,4-alpha-glucan branching enzyme.	Transfers a segment of a (1->4)-alpha-D-glucan chain to a primary hydroxygroup in a similar glucan chain.	Control
115252745	Peptoclostridium difficile 630	2.4.1.18	1,4-alpha-glucan branching enzyme.	Transfers a segment of a (1->4)-alpha-D-glucan chain to a primary hydroxygroup in a similar glucan chain.	Autism
291516108	Alistipes shahii WAL 8301	2.1.1.37	DNA (cytosine-5-)-methyltransferase.	S-adenosyl-L-methionine + DNA = S-adenosyl-L-homocysteine +DNA containing 5-methylcytosine.	Control
110676061	Clostridium perfringens ATCC 13124	2.1.1.37	DNA (cytosine-5-)-methyltransferase.	S-adenosyl-L-methionine + DNA = S-adenosyl-L-homocysteine +DNA containing 5-methylcytosine.	Autism
291516108	Alistipes shahii WAL 8301	2.1.1.37	DNA (cytosine-5-)-methyltransferase.	S-adenosyl-L-methionine + DNA = S-adenosyl-L-homocysteine +DNA containing 5-methylcytosine.	Control
110676061	Clostridium perfringens ATCC 13124	2.1.1.37	DNA (cytosine-5-)-methyltransferase.	S-adenosyl-L-methionine + DNA = S-adenosyl-L-homocysteine +DNA containing 5-methylcytosine.	Autism
291516108	Alistipes shahii WAL 8301	2.1.1.37	DNA (cytosine-5-)-methyltransferase.	S-adenosyl-L-methionine + DNA = S-adenosyl-L-homocysteine +DNA containing 5-methylcytosine.	Control
110676061	Clostridium perfringens ATCC 13124	2.1.1.37	DNA (cytosine-5-)-methyltransferase.	S-adenosyl-L-methionine + DNA = S-adenosyl-L-homocysteine +DNA containing 5-methylcytosine.	Autism
291516108	Alistipes shahii WAL 8301	2.7.6.1	Ribose-phosphate diphosphokinase.	ATP + D-ribose 5-phosphate = AMP + 5-phospho-alpha-D-ribose1-diphosphate.	Control
187426706	Akkermansia muciniphila ATCC BAA-835	2.7.6.1	Ribose-phosphate diphosphokinase.	ATP + D-ribose 5-phosphate = AMP + 5-phospho-alpha-D-ribose1-diphosphate.	Autism
291516108	Alistipes shahii WAL 8301	2.7.6.1	Ribose-phosphate diphosphokinase.	ATP + D-ribose 5-phosphate = AMP + 5-phospho-alpha-D-ribose1-diphosphate.	Control
110676061	Clostridium perfringens ATCC 13124	2.7.6.1	Ribose-phosphate diphosphokinase.	ATP + D-ribose 5-phosphate = AMP + 5-phospho-alpha-D-ribose1-diphosphate.	Autism
291516108	Alistipes shahii WAL 8301	2.7.6.1	Ribose-phosphate diphosphokinase.	ATP + D-ribose 5-phosphate = AMP + 5-phospho-alpha-D-ribose1-diphosphate.	Control
110676061	Clostridium perfringens ATCC 13124	2.7.6.1	Ribose-phosphate diphosphokinase.	ATP + D-ribose 5-phosphate = AMP + 5-phospho-alpha-D-ribose1-diphosphate.	Autism
291516108	Alistipes shahii WAL 8301	2.7.6.1	Ribose-phosphate diphosphokinase.	ATP + D-ribose 5-phosphate = AMP + 5-phospho-alpha-D-ribose1-diphosphate.	Control
219869941	Desulfovibrio desulfuricans ATCC 27774	2.7.6.1	Ribose-phosphate diphosphokinase.	ATP + D-ribose 5-phosphate = AMP + 5-phospho-alpha-D-ribose1-diphosphate.	Autism
291516108	Alistipes shahii WAL 8301	2.7.6.1	Ribose-phosphate diphosphokinase.	ATP + D-ribose 5-phosphate = AMP + 5-phospho-alpha-D-ribose1-diphosphate.	Control
115252745	Peptoclostridium difficile 630	2.7.6.1	Ribose-phosphate diphosphokinase.	ATP + D-ribose 5-phosphate = AMP + 5-phospho-alpha-D-ribose1-diphosphate.	Autism
291516108	Alistipes shahii WAL 8301	3.5.1.24	Choloylglycine hydrolase.	3-alpha,7-alpha,12-alpha-trihydroxy-5-beta-cholan-24-oylglycine + H(2)O =3-alpha,7-alpha,12-alpha-trihydroxy-5-beta-cholanate + glycine.	Control
110676061	Clostridium perfringens ATCC 13124	3.5.1.24	Choloylglycine hydrolase.	3-alpha,7-alpha,12-alpha-trihydroxy-5-beta-cholan-24-oylglycine + H(2)O =3-alpha,7-alpha,12-alpha-trihydroxy-5-beta-cholanate + glycine.	Autism
291516108	Alistipes shahii WAL 8301	4.1.1.19	Arginine decarboxylase.	L-arginine = agmatine + CO(2).	Control
115252745	Peptoclostridium difficile 630	4.1.1.19	Arginine decarboxylase.	L-arginine = agmatine + CO(2).	Autism
291516108	Alistipes shahii WAL 8301	4.1.1.19	Arginine decarboxylase.	L-arginine = agmatine + CO(2).	Control
115252745	Peptoclostridium difficile 630	4.1.1.19	Arginine decarboxylase.	L-arginine = agmatine + CO(2).	Autism
291516108	Alistipes shahii WAL 8301	2.7.1.24	Dephospho-CoA kinase.	ATP + 3'-dephospho-CoA = ADP + CoA.	Control
187426706	Akkermansia muciniphila ATCC BAA-835	2.7.1.24	Dephospho-CoA kinase.	ATP + 3'-dephospho-CoA = ADP + CoA.	Autism
291516108	Alistipes shahii WAL 8301	2.7.1.24	Dephospho-CoA kinase.	ATP + 3'-dephospho-CoA = ADP + CoA.	Control
110676061	Clostridium perfringens ATCC 13124	2.7.1.24	Dephospho-CoA kinase.	ATP + 3'-dephospho-CoA = ADP + CoA.	Autism
291516108	Alistipes shahii WAL 8301	2.7.1.24	Dephospho-CoA kinase.	ATP + 3'-dephospho-CoA = ADP + CoA.	Control
115252745	Peptoclostridium difficile 630	2.7.1.24	Dephospho-CoA kinase.	ATP + 3'-dephospho-CoA = ADP + CoA.	Autism
291516108	Alistipes shahii WAL 8301	2.5.1.15	Dihydropteroate synthase.	(2-amino-4-hydroxy-7,8-dihydropteridin-6-yl)methyl diphosphate +4-aminobenzoate = diphosphate + dihydropteroate.	Control
187426706	Akkermansia muciniphila ATCC BAA-835	2.5.1.15	Dihydropteroate synthase.	(2-amino-4-hydroxy-7,8-dihydropteridin-6-yl)methyl diphosphate +4-aminobenzoate = diphosphate + dihydropteroate.	Autism
291516108	Alistipes shahii WAL 8301	2.5.1.15	Dihydropteroate synthase.	(2-amino-4-hydroxy-7,8-dihydropteridin-6-yl)methyl diphosphate +4-aminobenzoate = diphosphate + dihydropteroate.	Control
110676061	Clostridium perfringens ATCC 13124	2.5.1.15	Dihydropteroate synthase.	(2-amino-4-hydroxy-7,8-dihydropteridin-6-yl)methyl diphosphate +4-aminobenzoate = diphosphate + dihydropteroate.	Autism
291516108	Alistipes shahii WAL 8301	2.5.1.15	Dihydropteroate synthase.	(2-amino-4-hydroxy-7,8-dihydropteridin-6-yl)methyl diphosphate +4-aminobenzoate = diphosphate + dihydropteroate.	Control
219869941	Desulfovibrio desulfuricans ATCC 27774	2.5.1.15	Dihydropteroate synthase.	(2-amino-4-hydroxy-7,8-dihydropteridin-6-yl)methyl diphosphate +4-aminobenzoate = diphosphate + dihydropteroate.	Autism
291516108	Alistipes shahii WAL 8301	2.5.1.15	Dihydropteroate synthase.	(2-amino-4-hydroxy-7,8-dihydropteridin-6-yl)methyl diphosphate +4-aminobenzoate = diphosphate + dihydropteroate.	Control
115252745	Peptoclostridium difficile 630	2.5.1.15	Dihydropteroate synthase.	(2-amino-4-hydroxy-7,8-dihydropteridin-6-yl)methyl diphosphate +4-aminobenzoate = diphosphate + dihydropteroate.	Autism
291516108	Alistipes shahii WAL 8301	4.2.1.46	dTDP-glucose 4,6-dehydratase.	dTDP-alpha-D-glucose = dTDP-4-dehydro-6-deoxy-alpha-D-glucose + H(2)O.	Control
110676061	Clostridium perfringens ATCC 13124	4.2.1.46	dTDP-glucose 4,6-dehydratase.	dTDP-alpha-D-glucose = dTDP-4-dehydro-6-deoxy-alpha-D-glucose + H(2)O.	Autism
291516108	Alistipes shahii WAL 8301	4.2.1.46	dTDP-glucose 4,6-dehydratase.	dTDP-alpha-D-glucose = dTDP-4-dehydro-6-deoxy-alpha-D-glucose + H(2)O.	Control
110676061	Clostridium perfringens ATCC 13124	4.2.1.46	dTDP-glucose 4,6-dehydratase.	dTDP-alpha-D-glucose = dTDP-4-dehydro-6-deoxy-alpha-D-glucose + H(2)O.	Autism
291516108	Alistipes shahii WAL 8301	1.1.1.267	1-deoxy-D-xylulose-5-phosphate reductoisomerase.	2-C-methyl-D-erythritol 4-phosphate + NADP(+) = 1-deoxy-D-xylulose5-phosphate + NADPH.	Control
187426706	Akkermansia muciniphila ATCC BAA-835	1.1.1.267	1-deoxy-D-xylulose-5-phosphate reductoisomerase.	2-C-methyl-D-erythritol 4-phosphate + NADP(+) = 1-deoxy-D-xylulose5-phosphate + NADPH.	Autism
291516108	Alistipes shahii WAL 8301	1.1.1.267	1-deoxy-D-xylulose-5-phosphate reductoisomerase.	2-C-methyl-D-erythritol 4-phosphate + NADP(+) = 1-deoxy-D-xylulose5-phosphate + NADPH.	Control
110676061	Clostridium perfringens ATCC 13124	1.1.1.267	1-deoxy-D-xylulose-5-phosphate reductoisomerase.	2-C-methyl-D-erythritol 4-phosphate + NADP(+) = 1-deoxy-D-xylulose5-phosphate + NADPH.	Autism
291516108	Alistipes shahii WAL 8301	1.1.1.267	1-deoxy-D-xylulose-5-phosphate reductoisomerase.	2-C-methyl-D-erythritol 4-phosphate + NADP(+) = 1-deoxy-D-xylulose5-phosphate + NADPH.	Control
219869941	Desulfovibrio desulfuricans ATCC 27774	1.1.1.267	1-deoxy-D-xylulose-5-phosphate reductoisomerase.	2-C-methyl-D-erythritol 4-phosphate + NADP(+) = 1-deoxy-D-xylulose5-phosphate + NADPH.	Autism
291516108	Alistipes shahii WAL 8301	1.1.1.267	1-deoxy-D-xylulose-5-phosphate reductoisomerase.	2-C-methyl-D-erythritol 4-phosphate + NADP(+) = 1-deoxy-D-xylulose5-phosphate + NADPH.	Control
115252745	Peptoclostridium difficile 630	1.1.1.267	1-deoxy-D-xylulose-5-phosphate reductoisomerase.	2-C-methyl-D-erythritol 4-phosphate + NADP(+) = 1-deoxy-D-xylulose5-phosphate + NADPH.	Autism
291516108	Alistipes shahii WAL 8301	5.4.2.6	Beta-phosphoglucomutase.	Beta-D-glucose 1-phosphate = beta-D-glucose 6-phosphate.	Control
115252745	Peptoclostridium difficile 630	5.4.2.6	Beta-phosphoglucomutase.	Beta-D-glucose 1-phosphate = beta-D-glucose 6-phosphate.	Autism
291516108	Alistipes shahii WAL 8301	5.4.2.6	Beta-phosphoglucomutase.	Beta-D-glucose 1-phosphate = beta-D-glucose 6-phosphate.	Control
115252745	Peptoclostridium difficile 630	5.4.2.6	Beta-phosphoglucomutase.	Beta-D-glucose 1-phosphate = beta-D-glucose 6-phosphate.	Autism
291516108	Alistipes shahii WAL 8301	2.4.1.8	Maltose phosphorylase.	Maltose + phosphate = D-glucose + beta-D-glucose 1-phosphate.	Control
115252745	Peptoclostridium difficile 630	2.4.1.8	Maltose phosphorylase.	Maltose + phosphate = D-glucose + beta-D-glucose 1-phosphate.	Autism
291516108	Alistipes shahii WAL 8301	5.99.1.3	DNA topoisomerase (ATP-hydrolyzing).	ATP-dependent breakage, passage and rejoining of double-stranded DNA.	Control
187426706	Akkermansia muciniphila ATCC BAA-835	5.99.1.3	DNA topoisomerase (ATP-hydrolyzing).	ATP-dependent breakage, passage and rejoining of double-stranded DNA.	Autism
291516108	Alistipes shahii WAL 8301	5.99.1.3	DNA topoisomerase (ATP-hydrolyzing).	ATP-dependent breakage, passage and rejoining of double-stranded DNA.	Control
187426706	Akkermansia muciniphila ATCC BAA-835	5.99.1.3	DNA topoisomerase (ATP-hydrolyzing).	ATP-dependent breakage, passage and rejoining of double-stranded DNA.	Autism
291516108	Alistipes shahii WAL 8301	5.99.1.3	DNA topoisomerase (ATP-hydrolyzing).	ATP-dependent breakage, passage and rejoining of double-stranded DNA.	Control
187426706	Akkermansia muciniphila ATCC BAA-835	5.99.1.3	DNA topoisomerase (ATP-hydrolyzing).	ATP-dependent breakage, passage and rejoining of double-stranded DNA.	Autism
291516108	Alistipes shahii WAL 8301	5.99.1.3	DNA topoisomerase (ATP-hydrolyzing).	ATP-dependent breakage, passage and rejoining of double-stranded DNA.	Control
110676061	Clostridium perfringens ATCC 13124	5.99.1.3	DNA topoisomerase (ATP-hydrolyzing).	ATP-dependent breakage, passage and rejoining of double-stranded DNA.	Autism
291516108	Alistipes shahii WAL 8301	5.99.1.3	DNA topoisomerase (ATP-hydrolyzing).	ATP-dependent breakage, passage and rejoining of double-stranded DNA.	Control
110676061	Clostridium perfringens ATCC 13124	5.99.1.3	DNA topoisomerase (ATP-hydrolyzing).	ATP-dependent breakage, passage and rejoining of double-stranded DNA.	Autism
291516108	Alistipes shahii WAL 8301	5.99.1.3	DNA topoisomerase (ATP-hydrolyzing).	ATP-dependent breakage, passage and rejoining of double-stranded DNA.	Control
219869941	Desulfovibrio desulfuricans ATCC 27774	5.99.1.3	DNA topoisomerase (ATP-hydrolyzing).	ATP-dependent breakage, passage and rejoining of double-stranded DNA.	Autism
291516108	Alistipes shahii WAL 8301	5.99.1.3	DNA topoisomerase (ATP-hydrolyzing).	ATP-dependent breakage, passage and rejoining of double-stranded DNA.	Control
219869941	Desulfovibrio desulfuricans ATCC 27774	5.99.1.3	DNA topoisomerase (ATP-hydrolyzing).	ATP-dependent breakage, passage and rejoining of double-stranded DNA.	Autism
291516108	Alistipes shahii WAL 8301	5.99.1.3	DNA topoisomerase (ATP-hydrolyzing).	ATP-dependent breakage, passage and rejoining of double-stranded DNA.	Control
115252745	Peptoclostridium difficile 630	5.99.1.3	DNA topoisomerase (ATP-hydrolyzing).	ATP-dependent breakage, passage and rejoining of double-stranded DNA.	Autism
291516108	Alistipes shahii WAL 8301	5.99.1.3	DNA topoisomerase (ATP-hydrolyzing).	ATP-dependent breakage, passage and rejoining of double-stranded DNA.	Control
115252745	Peptoclostridium difficile 630	5.99.1.3	DNA topoisomerase (ATP-hydrolyzing).	ATP-dependent breakage, passage and rejoining of double-stranded DNA.	Autism
291516108	Alistipes shahii WAL 8301	2.7.1.71	Shikimate kinase.	ATP + shikimate = ADP + shikimate 3-phosphate.	Control
187426706	Akkermansia muciniphila ATCC BAA-835	2.7.1.71	Shikimate kinase.	ATP + shikimate = ADP + shikimate 3-phosphate.	Autism
291516108	Alistipes shahii WAL 8301	2.7.1.71	Shikimate kinase.	ATP + shikimate = ADP + shikimate 3-phosphate.	Control
110676061	Clostridium perfringens ATCC 13124	2.7.1.71	Shikimate kinase.	ATP + shikimate = ADP + shikimate 3-phosphate.	Autism
291516108	Alistipes shahii WAL 8301	2.7.1.71	Shikimate kinase.	ATP + shikimate = ADP + shikimate 3-phosphate.	Control
219869941	Desulfovibrio desulfuricans ATCC 27774	2.7.1.71	Shikimate kinase.	ATP + shikimate = ADP + shikimate 3-phosphate.	Autism
291516108	Alistipes shahii WAL 8301	2.7.1.71	Shikimate kinase.	ATP + shikimate = ADP + shikimate 3-phosphate.	Control
219869941	Desulfovibrio desulfuricans ATCC 27774	2.7.1.71	Shikimate kinase.	ATP + shikimate = ADP + shikimate 3-phosphate.	Autism
291516108	Alistipes shahii WAL 8301	2.7.1.71	Shikimate kinase.	ATP + shikimate = ADP + shikimate 3-phosphate.	Control
115252745	Peptoclostridium difficile 630	2.7.1.71	Shikimate kinase.	ATP + shikimate = ADP + shikimate 3-phosphate.	Autism
291516108	Alistipes shahii WAL 8301	4.2.1.7	Altronate dehydratase.	D-altronate = 2-dehydro-3-deoxy-D-gluconate + H(2)O.	Control
115252745	Peptoclostridium difficile 630	4.2.1.7	Altronate dehydratase.	D-altronate = 2-dehydro-3-deoxy-D-gluconate + H(2)O.	Autism
291516108	Alistipes shahii WAL 8301	4.2.1.7	Altronate dehydratase.	D-altronate = 2-dehydro-3-deoxy-D-gluconate + H(2)O.	Control
115252745	Peptoclostridium difficile 630	4.2.1.7	Altronate dehydratase.	D-altronate = 2-dehydro-3-deoxy-D-gluconate + H(2)O.	Autism
291516108	Alistipes shahii WAL 8301	5.4.99.12	tRNA pseudouridine(38-40) synthase.	tRNA uridine(38-40) = tRNA pseudouridine(38-40).	Control
187426706	Akkermansia muciniphila ATCC BAA-835	5.4.99.12	tRNA pseudouridine(38-40) synthase.	tRNA uridine(38-40) = tRNA pseudouridine(38-40).	Autism
291516108	Alistipes shahii WAL 8301	5.4.99.12	tRNA pseudouridine(38-40) synthase.	tRNA uridine(38-40) = tRNA pseudouridine(38-40).	Control
110676061	Clostridium perfringens ATCC 13124	5.4.99.12	tRNA pseudouridine(38-40) synthase.	tRNA uridine(38-40) = tRNA pseudouridine(38-40).	Autism
291516108	Alistipes shahii WAL 8301	5.4.99.12	tRNA pseudouridine(38-40) synthase.	tRNA uridine(38-40) = tRNA pseudouridine(38-40).	Control
110676061	Clostridium perfringens ATCC 13124	5.4.99.12	tRNA pseudouridine(38-40) synthase.	tRNA uridine(38-40) = tRNA pseudouridine(38-40).	Autism
291516108	Alistipes shahii WAL 8301	5.4.99.12	tRNA pseudouridine(38-40) synthase.	tRNA uridine(38-40) = tRNA pseudouridine(38-40).	Control
110676061	Clostridium perfringens ATCC 13124	5.4.99.12	tRNA pseudouridine(38-40) synthase.	tRNA uridine(38-40) = tRNA pseudouridine(38-40).	Autism
291516108	Alistipes shahii WAL 8301	5.4.99.12	tRNA pseudouridine(38-40) synthase.	tRNA uridine(38-40) = tRNA pseudouridine(38-40).	Control
219869941	Desulfovibrio desulfuricans ATCC 27774	5.4.99.12	tRNA pseudouridine(38-40) synthase.	tRNA uridine(38-40) = tRNA pseudouridine(38-40).	Autism
291516108	Alistipes shahii WAL 8301	5.4.99.12	tRNA pseudouridine(38-40) synthase.	tRNA uridine(38-40) = tRNA pseudouridine(38-40).	Control
115252745	Peptoclostridium difficile 630	5.4.99.12	tRNA pseudouridine(38-40) synthase.	tRNA uridine(38-40) = tRNA pseudouridine(38-40).	Autism
291516108	Alistipes shahii WAL 8301	5.4.99.12	tRNA pseudouridine(38-40) synthase.	tRNA uridine(38-40) = tRNA pseudouridine(38-40).	Control
115252745	Peptoclostridium difficile 630	5.4.99.12	tRNA pseudouridine(38-40) synthase.	tRNA uridine(38-40) = tRNA pseudouridine(38-40).	Autism
291516108	Alistipes shahii WAL 8301	4.3.3.7	4-hydroxy-tetrahydrodipicolinate synthase.	Pyruvate + L-aspartate-4-semialdehyde = (4S)-4-hydroxy-2,3,4,5-tetrahydro-(2S)-dipicolinate + H(2)O.	Control
187426706	Akkermansia muciniphila ATCC BAA-835	4.3.3.7	4-hydroxy-tetrahydrodipicolinate synthase.	Pyruvate + L-aspartate-4-semialdehyde = (4S)-4-hydroxy-2,3,4,5-tetrahydro-(2S)-dipicolinate + H(2)O.	Autism
291516108	Alistipes shahii WAL 8301	4.3.3.7	4-hydroxy-tetrahydrodipicolinate synthase.	Pyruvate + L-aspartate-4-semialdehyde = (4S)-4-hydroxy-2,3,4,5-tetrahydro-(2S)-dipicolinate + H(2)O.	Control
110676061	Clostridium perfringens ATCC 13124	4.3.3.7	4-hydroxy-tetrahydrodipicolinate synthase.	Pyruvate + L-aspartate-4-semialdehyde = (4S)-4-hydroxy-2,3,4,5-tetrahydro-(2S)-dipicolinate + H(2)O.	Autism
291516108	Alistipes shahii WAL 8301	4.3.3.7	4-hydroxy-tetrahydrodipicolinate synthase.	Pyruvate + L-aspartate-4-semialdehyde = (4S)-4-hydroxy-2,3,4,5-tetrahydro-(2S)-dipicolinate + H(2)O.	Control
219869941	Desulfovibrio desulfuricans ATCC 27774	4.3.3.7	4-hydroxy-tetrahydrodipicolinate synthase.	Pyruvate + L-aspartate-4-semialdehyde = (4S)-4-hydroxy-2,3,4,5-tetrahydro-(2S)-dipicolinate + H(2)O.	Autism
291516108	Alistipes shahii WAL 8301	4.3.3.7	4-hydroxy-tetrahydrodipicolinate synthase.	Pyruvate + L-aspartate-4-semialdehyde = (4S)-4-hydroxy-2,3,4,5-tetrahydro-(2S)-dipicolinate + H(2)O.	Control
115252745	Peptoclostridium difficile 630	4.3.3.7	4-hydroxy-tetrahydrodipicolinate synthase.	Pyruvate + L-aspartate-4-semialdehyde = (4S)-4-hydroxy-2,3,4,5-tetrahydro-(2S)-dipicolinate + H(2)O.	Autism
291516108	Alistipes shahii WAL 8301	4.3.3.7	4-hydroxy-tetrahydrodipicolinate synthase.	Pyruvate + L-aspartate-4-semialdehyde = (4S)-4-hydroxy-2,3,4,5-tetrahydro-(2S)-dipicolinate + H(2)O.	Control
115252745	Peptoclostridium difficile 630	4.3.3.7	4-hydroxy-tetrahydrodipicolinate synthase.	Pyruvate + L-aspartate-4-semialdehyde = (4S)-4-hydroxy-2,3,4,5-tetrahydro-(2S)-dipicolinate + H(2)O.	Autism
291516108	Alistipes shahii WAL 8301	4.3.3.7	4-hydroxy-tetrahydrodipicolinate synthase.	Pyruvate + L-aspartate-4-semialdehyde = (4S)-4-hydroxy-2,3,4,5-tetrahydro-(2S)-dipicolinate + H(2)O.	Control
115252745	Peptoclostridium difficile 630	4.3.3.7	4-hydroxy-tetrahydrodipicolinate synthase.	Pyruvate + L-aspartate-4-semialdehyde = (4S)-4-hydroxy-2,3,4,5-tetrahydro-(2S)-dipicolinate + H(2)O.	Autism
291516108	Alistipes shahii WAL 8301	4.3.3.7	4-hydroxy-tetrahydrodipicolinate synthase.	Pyruvate + L-aspartate-4-semialdehyde = (4S)-4-hydroxy-2,3,4,5-tetrahydro-(2S)-dipicolinate + H(2)O.	Control
115252745	Peptoclostridium difficile 630	4.3.3.7	4-hydroxy-tetrahydrodipicolinate synthase.	Pyruvate + L-aspartate-4-semialdehyde = (4S)-4-hydroxy-2,3,4,5-tetrahydro-(2S)-dipicolinate + H(2)O.	Autism
291516108	Alistipes shahii WAL 8301	6.5.1.2	DNA ligase (NAD(+)).	NAD(+) + (deoxyribonucleotide)(n) + (deoxyribonucleotide)(m) = AMP +beta-nicotinamide D-ribonucleotide + (deoxyribonucleotide)(n+m).	Control
187426706	Akkermansia muciniphila ATCC BAA-835	6.5.1.2	DNA ligase (NAD(+)).	NAD(+) + (deoxyribonucleotide)(n) + (deoxyribonucleotide)(m) = AMP +beta-nicotinamide D-ribonucleotide + (deoxyribonucleotide)(n+m).	Autism
291516108	Alistipes shahii WAL 8301	6.5.1.2	DNA ligase (NAD(+)).	NAD(+) + (deoxyribonucleotide)(n) + (deoxyribonucleotide)(m) = AMP +beta-nicotinamide D-ribonucleotide + (deoxyribonucleotide)(n+m).	Control
110676061	Clostridium perfringens ATCC 13124	6.5.1.2	DNA ligase (NAD(+)).	NAD(+) + (deoxyribonucleotide)(n) + (deoxyribonucleotide)(m) = AMP +beta-nicotinamide D-ribonucleotide + (deoxyribonucleotide)(n+m).	Autism
291516108	Alistipes shahii WAL 8301	6.5.1.2	DNA ligase (NAD(+)).	NAD(+) + (deoxyribonucleotide)(n) + (deoxyribonucleotide)(m) = AMP +beta-nicotinamide D-ribonucleotide + (deoxyribonucleotide)(n+m).	Control
219869941	Desulfovibrio desulfuricans ATCC 27774	6.5.1.2	DNA ligase (NAD(+)).	NAD(+) + (deoxyribonucleotide)(n) + (deoxyribonucleotide)(m) = AMP +beta-nicotinamide D-ribonucleotide + (deoxyribonucleotide)(n+m).	Autism
291516108	Alistipes shahii WAL 8301	6.5.1.2	DNA ligase (NAD(+)).	NAD(+) + (deoxyribonucleotide)(n) + (deoxyribonucleotide)(m) = AMP +beta-nicotinamide D-ribonucleotide + (deoxyribonucleotide)(n+m).	Control
115252745	Peptoclostridium difficile 630	6.5.1.2	DNA ligase (NAD(+)).	NAD(+) + (deoxyribonucleotide)(n) + (deoxyribonucleotide)(m) = AMP +beta-nicotinamide D-ribonucleotide + (deoxyribonucleotide)(n+m).	Autism
291516108	Alistipes shahii WAL 8301	6.3.4.4	Adenylosuccinate synthase.	GTP + IMP + L-aspartate = GDP + phosphate + N(6)-(1,2-dicarboxyethyl)-AMP.	Control
187426706	Akkermansia muciniphila ATCC BAA-835	6.3.4.4	Adenylosuccinate synthase.	GTP + IMP + L-aspartate = GDP + phosphate + N(6)-(1,2-dicarboxyethyl)-AMP.	Autism
291516108	Alistipes shahii WAL 8301	6.3.4.4	Adenylosuccinate synthase.	GTP + IMP + L-aspartate = GDP + phosphate + N(6)-(1,2-dicarboxyethyl)-AMP.	Control
110676061	Clostridium perfringens ATCC 13124	6.3.4.4	Adenylosuccinate synthase.	GTP + IMP + L-aspartate = GDP + phosphate + N(6)-(1,2-dicarboxyethyl)-AMP.	Autism
291516108	Alistipes shahii WAL 8301	6.3.4.4	Adenylosuccinate synthase.	GTP + IMP + L-aspartate = GDP + phosphate + N(6)-(1,2-dicarboxyethyl)-AMP.	Control
219869941	Desulfovibrio desulfuricans ATCC 27774	6.3.4.4	Adenylosuccinate synthase.	GTP + IMP + L-aspartate = GDP + phosphate + N(6)-(1,2-dicarboxyethyl)-AMP.	Autism
291516108	Alistipes shahii WAL 8301	6.3.4.4	Adenylosuccinate synthase.	GTP + IMP + L-aspartate = GDP + phosphate + N(6)-(1,2-dicarboxyethyl)-AMP.	Control
115252745	Peptoclostridium difficile 630	6.3.4.4	Adenylosuccinate synthase.	GTP + IMP + L-aspartate = GDP + phosphate + N(6)-(1,2-dicarboxyethyl)-AMP.	Autism
291516108	Alistipes shahii WAL 8301	3.5.1.2	Glutaminase.	L-glutamine + H(2)O = L-glutamate + NH(3).	Control
187426706	Akkermansia muciniphila ATCC BAA-835	3.5.1.2	Glutaminase.	L-glutamine + H(2)O = L-glutamate + NH(3).	Autism
291516108	Alistipes shahii WAL 8301	3.5.1.2	Glutaminase.	L-glutamine + H(2)O = L-glutamate + NH(3).	Control
110676061	Clostridium perfringens ATCC 13124	3.5.1.2	Glutaminase.	L-glutamine + H(2)O = L-glutamate + NH(3).	Autism
291516108	Alistipes shahii WAL 8301	3.5.1.2	Glutaminase.	L-glutamine + H(2)O = L-glutamate + NH(3).	Control
219869941	Desulfovibrio desulfuricans ATCC 27774	3.5.1.2	Glutaminase.	L-glutamine + H(2)O = L-glutamate + NH(3).	Autism
291516108	Alistipes shahii WAL 8301	3.5.1.2	Glutaminase.	L-glutamine + H(2)O = L-glutamate + NH(3).	Control
115252745	Peptoclostridium difficile 630	3.5.1.2	Glutaminase.	L-glutamine + H(2)O = L-glutamate + NH(3).	Autism
291516108	Alistipes shahii WAL 8301	2.7.1.11	6-phosphofructokinase.	ATP + D-fructose 6-phosphate = ADP + D-fructose 1,6-bisphosphate.	Control
187426706	Akkermansia muciniphila ATCC BAA-835	2.7.1.11	6-phosphofructokinase.	ATP + D-fructose 6-phosphate = ADP + D-fructose 1,6-bisphosphate.	Autism
291516108	Alistipes shahii WAL 8301	2.7.1.11	6-phosphofructokinase.	ATP + D-fructose 6-phosphate = ADP + D-fructose 1,6-bisphosphate.	Control
187426706	Akkermansia muciniphila ATCC BAA-835	2.7.1.11	6-phosphofructokinase.	ATP + D-fructose 6-phosphate = ADP + D-fructose 1,6-bisphosphate.	Autism
291516108	Alistipes shahii WAL 8301	2.7.1.11	6-phosphofructokinase.	ATP + D-fructose 6-phosphate = ADP + D-fructose 1,6-bisphosphate.	Control
110676061	Clostridium perfringens ATCC 13124	2.7.1.11	6-phosphofructokinase.	ATP + D-fructose 6-phosphate = ADP + D-fructose 1,6-bisphosphate.	Autism
291516108	Alistipes shahii WAL 8301	2.7.1.11	6-phosphofructokinase.	ATP + D-fructose 6-phosphate = ADP + D-fructose 1,6-bisphosphate.	Control
219869941	Desulfovibrio desulfuricans ATCC 27774	2.7.1.11	6-phosphofructokinase.	ATP + D-fructose 6-phosphate = ADP + D-fructose 1,6-bisphosphate.	Autism
291516108	Alistipes shahii WAL 8301	2.7.1.11	6-phosphofructokinase.	ATP + D-fructose 6-phosphate = ADP + D-fructose 1,6-bisphosphate.	Control
115252745	Peptoclostridium difficile 630	2.7.1.11	6-phosphofructokinase.	ATP + D-fructose 6-phosphate = ADP + D-fructose 1,6-bisphosphate.	Autism
291516108	Alistipes shahii WAL 8301	2.7.1.11	6-phosphofructokinase.	ATP + D-fructose 6-phosphate = ADP + D-fructose 1,6-bisphosphate.	Control
115252745	Peptoclostridium difficile 630	2.7.1.11	6-phosphofructokinase.	ATP + D-fructose 6-phosphate = ADP + D-fructose 1,6-bisphosphate.	Autism
291516108	Alistipes shahii WAL 8301	4.1.1.15	Glutamate decarboxylase.	L-glutamate = 4-aminobutanoate + CO(2).	Control
110676061	Clostridium perfringens ATCC 13124	4.1.1.15	Glutamate decarboxylase.	L-glutamate = 4-aminobutanoate + CO(2).	Autism
291516108	Alistipes shahii WAL 8301	4.1.1.15	Glutamate decarboxylase.	L-glutamate = 4-aminobutanoate + CO(2).	Control
219869941	Desulfovibrio desulfuricans ATCC 27774	4.1.1.15	Glutamate decarboxylase.	L-glutamate = 4-aminobutanoate + CO(2).	Autism
291516108	Alistipes shahii WAL 8301	5.4.2.11	Phosphoglycerate mutase (2,3-diphosphoglycerate-dependent).	2-phospho-D-glycerate = 3-phospho-D-glycerate.	Control
187426706	Akkermansia muciniphila ATCC BAA-835	5.4.2.11	Phosphoglycerate mutase (2,3-diphosphoglycerate-dependent).	2-phospho-D-glycerate = 3-phospho-D-glycerate.	Autism
291516108	Alistipes shahii WAL 8301	5.4.2.11	Phosphoglycerate mutase (2,3-diphosphoglycerate-dependent).	2-phospho-D-glycerate = 3-phospho-D-glycerate.	Control
110676061	Clostridium perfringens ATCC 13124	5.4.2.11	Phosphoglycerate mutase (2,3-diphosphoglycerate-dependent).	2-phospho-D-glycerate = 3-phospho-D-glycerate.	Autism
291516108	Alistipes shahii WAL 8301	5.4.2.11	Phosphoglycerate mutase (2,3-diphosphoglycerate-dependent).	2-phospho-D-glycerate = 3-phospho-D-glycerate.	Control
219869941	Desulfovibrio desulfuricans ATCC 27774	5.4.2.11	Phosphoglycerate mutase (2,3-diphosphoglycerate-dependent).	2-phospho-D-glycerate = 3-phospho-D-glycerate.	Autism
291516108	Alistipes shahii WAL 8301	5.4.2.11	Phosphoglycerate mutase (2,3-diphosphoglycerate-dependent).	2-phospho-D-glycerate = 3-phospho-D-glycerate.	Control
115252745	Peptoclostridium difficile 630	5.4.2.11	Phosphoglycerate mutase (2,3-diphosphoglycerate-dependent).	2-phospho-D-glycerate = 3-phospho-D-glycerate.	Autism
291516108	Alistipes shahii WAL 8301	6.1.1.7	Alanine--tRNA ligase.	ATP + L-alanine + tRNA(Ala) = AMP + diphosphate + L-alanyl-tRNA(Ala).	Control
187426706	Akkermansia muciniphila ATCC BAA-835	6.1.1.7	Alanine--tRNA ligase.	ATP + L-alanine + tRNA(Ala) = AMP + diphosphate + L-alanyl-tRNA(Ala).	Autism
291516108	Alistipes shahii WAL 8301	6.1.1.7	Alanine--tRNA ligase.	ATP + L-alanine + tRNA(Ala) = AMP + diphosphate + L-alanyl-tRNA(Ala).	Control
110676061	Clostridium perfringens ATCC 13124	6.1.1.7	Alanine--tRNA ligase.	ATP + L-alanine + tRNA(Ala) = AMP + diphosphate + L-alanyl-tRNA(Ala).	Autism
291516108	Alistipes shahii WAL 8301	6.1.1.7	Alanine--tRNA ligase.	ATP + L-alanine + tRNA(Ala) = AMP + diphosphate + L-alanyl-tRNA(Ala).	Control
219869941	Desulfovibrio desulfuricans ATCC 27774	6.1.1.7	Alanine--tRNA ligase.	ATP + L-alanine + tRNA(Ala) = AMP + diphosphate + L-alanyl-tRNA(Ala).	Autism
291516108	Alistipes shahii WAL 8301	6.1.1.7	Alanine--tRNA ligase.	ATP + L-alanine + tRNA(Ala) = AMP + diphosphate + L-alanyl-tRNA(Ala).	Control
115252745	Peptoclostridium difficile 630	6.1.1.7	Alanine--tRNA ligase.	ATP + L-alanine + tRNA(Ala) = AMP + diphosphate + L-alanyl-tRNA(Ala).	Autism
291516108	Alistipes shahii WAL 8301	3.6.1.1	Inorganic diphosphatase.	Diphosphate + H(2)O = 2 phosphate.	Control
187426706	Akkermansia muciniphila ATCC BAA-835	3.6.1.1	Inorganic diphosphatase.	Diphosphate + H(2)O = 2 phosphate.	Autism
291516108	Alistipes shahii WAL 8301	3.6.1.1	Inorganic diphosphatase.	Diphosphate + H(2)O = 2 phosphate.	Control
187426706	Akkermansia muciniphila ATCC BAA-835	3.6.1.1	Inorganic diphosphatase.	Diphosphate + H(2)O = 2 phosphate.	Autism
291516108	Alistipes shahii WAL 8301	3.6.1.1	Inorganic diphosphatase.	Diphosphate + H(2)O = 2 phosphate.	Control
219869941	Desulfovibrio desulfuricans ATCC 27774	3.6.1.1	Inorganic diphosphatase.	Diphosphate + H(2)O = 2 phosphate.	Autism
291516108	Alistipes shahii WAL 8301	3.6.1.1	Inorganic diphosphatase.	Diphosphate + H(2)O = 2 phosphate.	Control
115252745	Peptoclostridium difficile 630	3.6.1.1	Inorganic diphosphatase.	Diphosphate + H(2)O = 2 phosphate.	Autism
291516108	Alistipes shahii WAL 8301	4.2.1.46	dTDP-glucose 4,6-dehydratase.	dTDP-alpha-D-glucose = dTDP-4-dehydro-6-deoxy-alpha-D-glucose + H(2)O.	Control
110676061	Clostridium perfringens ATCC 13124	4.2.1.46	dTDP-glucose 4,6-dehydratase.	dTDP-alpha-D-glucose = dTDP-4-dehydro-6-deoxy-alpha-D-glucose + H(2)O.	Autism
291516108	Alistipes shahii WAL 8301	4.2.1.46	dTDP-glucose 4,6-dehydratase.	dTDP-alpha-D-glucose = dTDP-4-dehydro-6-deoxy-alpha-D-glucose + H(2)O.	Control
110676061	Clostridium perfringens ATCC 13124	4.2.1.46	dTDP-glucose 4,6-dehydratase.	dTDP-alpha-D-glucose = dTDP-4-dehydro-6-deoxy-alpha-D-glucose + H(2)O.	Autism
291516108	Alistipes shahii WAL 8301	1.1.1.133	dTDP-4-dehydrorhamnose reductase.	dTDP-beta-L-rhamnose + NADP(+) = dTDP-4-dehydro-beta-L-rhamnose + NADPH.	Control
110676061	Clostridium perfringens ATCC 13124	1.1.1.133	dTDP-4-dehydrorhamnose reductase.	dTDP-beta-L-rhamnose + NADP(+) = dTDP-4-dehydro-beta-L-rhamnose + NADPH.	Autism
291516108	Alistipes shahii WAL 8301	1.1.1.133	dTDP-4-dehydrorhamnose reductase.	dTDP-beta-L-rhamnose + NADP(+) = dTDP-4-dehydro-beta-L-rhamnose + NADPH.	Control
110676061	Clostridium perfringens ATCC 13124	1.1.1.133	dTDP-4-dehydrorhamnose reductase.	dTDP-beta-L-rhamnose + NADP(+) = dTDP-4-dehydro-beta-L-rhamnose + NADPH.	Autism
291516108	Alistipes shahii WAL 8301	1.1.1.133	dTDP-4-dehydrorhamnose reductase.	dTDP-beta-L-rhamnose + NADP(+) = dTDP-4-dehydro-beta-L-rhamnose + NADPH.	Control
219869941	Desulfovibrio desulfuricans ATCC 27774	1.1.1.133	dTDP-4-dehydrorhamnose reductase.	dTDP-beta-L-rhamnose + NADP(+) = dTDP-4-dehydro-beta-L-rhamnose + NADPH.	Autism
291516108	Alistipes shahii WAL 8301	5.1.3.13	dTDP-4-dehydrorhamnose 3,5-epimerase.	dTDP-4-dehydro-6-deoxy-alpha-D-glucose = dTDP-4-dehydro-beta-L-rhamnose.	Control
110676061	Clostridium perfringens ATCC 13124	5.1.3.13	dTDP-4-dehydrorhamnose 3,5-epimerase.	dTDP-4-dehydro-6-deoxy-alpha-D-glucose = dTDP-4-dehydro-beta-L-rhamnose.	Autism
291516108	Alistipes shahii WAL 8301	5.1.3.13	dTDP-4-dehydrorhamnose 3,5-epimerase.	dTDP-4-dehydro-6-deoxy-alpha-D-glucose = dTDP-4-dehydro-beta-L-rhamnose.	Control
110676061	Clostridium perfringens ATCC 13124	5.1.3.13	dTDP-4-dehydrorhamnose 3,5-epimerase.	dTDP-4-dehydro-6-deoxy-alpha-D-glucose = dTDP-4-dehydro-beta-L-rhamnose.	Autism
291516108	Alistipes shahii WAL 8301	5.1.3.13	dTDP-4-dehydrorhamnose 3,5-epimerase.	dTDP-4-dehydro-6-deoxy-alpha-D-glucose = dTDP-4-dehydro-beta-L-rhamnose.	Control
219869941	Desulfovibrio desulfuricans ATCC 27774	5.1.3.13	dTDP-4-dehydrorhamnose 3,5-epimerase.	dTDP-4-dehydro-6-deoxy-alpha-D-glucose = dTDP-4-dehydro-beta-L-rhamnose.	Autism
291516108	Alistipes shahii WAL 8301	2.7.7.24	Glucose-1-phosphate thymidylyltransferase.	dTTP + alpha-D-glucose 1-phosphate = diphosphate + dTDP-alpha-D-glucose.	Control
110676061	Clostridium perfringens ATCC 13124	2.7.7.24	Glucose-1-phosphate thymidylyltransferase.	dTTP + alpha-D-glucose 1-phosphate = diphosphate + dTDP-alpha-D-glucose.	Autism
291516108	Alistipes shahii WAL 8301	2.7.7.24	Glucose-1-phosphate thymidylyltransferase.	dTTP + alpha-D-glucose 1-phosphate = diphosphate + dTDP-alpha-D-glucose.	Control
110676061	Clostridium perfringens ATCC 13124	2.7.7.24	Glucose-1-phosphate thymidylyltransferase.	dTTP + alpha-D-glucose 1-phosphate = diphosphate + dTDP-alpha-D-glucose.	Autism
291516108	Alistipes shahii WAL 8301	1.8.4.11	Peptide-methionine (S)-S-oxide reductase.	(1) Peptide-L-methionine + thioredoxin disulfide + H(2)O = peptide-L-methionine (S)-S-oxide + thioredoxin.(2) L-methionine + thioredoxin disulfide + H(2)O = L-methionine (S)-S-oxide + thioredoxin.	Control
187426706	Akkermansia muciniphila ATCC BAA-835	1.8.4.11	Peptide-methionine (S)-S-oxide reductase.	(1) Peptide-L-methionine + thioredoxin disulfide + H(2)O = peptide-L-methionine (S)-S-oxide + thioredoxin.(2) L-methionine + thioredoxin disulfide + H(2)O = L-methionine (S)-S-oxide + thioredoxin.	Autism
291516108	Alistipes shahii WAL 8301	1.8.4.11	Peptide-methionine (S)-S-oxide reductase.	(1) Peptide-L-methionine + thioredoxin disulfide + H(2)O = peptide-L-methionine (S)-S-oxide + thioredoxin.(2) L-methionine + thioredoxin disulfide + H(2)O = L-methionine (S)-S-oxide + thioredoxin.	Control
187426706	Akkermansia muciniphila ATCC BAA-835	1.8.4.11	Peptide-methionine (S)-S-oxide reductase.	(1) Peptide-L-methionine + thioredoxin disulfide + H(2)O = peptide-L-methionine (S)-S-oxide + thioredoxin.(2) L-methionine + thioredoxin disulfide + H(2)O = L-methionine (S)-S-oxide + thioredoxin.	Autism
291516108	Alistipes shahii WAL 8301	1.8.4.11	Peptide-methionine (S)-S-oxide reductase.	(1) Peptide-L-methionine + thioredoxin disulfide + H(2)O = peptide-L-methionine (S)-S-oxide + thioredoxin.(2) L-methionine + thioredoxin disulfide + H(2)O = L-methionine (S)-S-oxide + thioredoxin.	Control
110676061	Clostridium perfringens ATCC 13124	1.8.4.11	Peptide-methionine (S)-S-oxide reductase.	(1) Peptide-L-methionine + thioredoxin disulfide + H(2)O = peptide-L-methionine (S)-S-oxide + thioredoxin.(2) L-methionine + thioredoxin disulfide + H(2)O = L-methionine (S)-S-oxide + thioredoxin.	Autism
291516108	Alistipes shahii WAL 8301	1.8.4.11	Peptide-methionine (S)-S-oxide reductase.	(1) Peptide-L-methionine + thioredoxin disulfide + H(2)O = peptide-L-methionine (S)-S-oxide + thioredoxin.(2) L-methionine + thioredoxin disulfide + H(2)O = L-methionine (S)-S-oxide + thioredoxin.	Control
115252745	Peptoclostridium difficile 630	1.8.4.11	Peptide-methionine (S)-S-oxide reductase.	(1) Peptide-L-methionine + thioredoxin disulfide + H(2)O = peptide-L-methionine (S)-S-oxide + thioredoxin.(2) L-methionine + thioredoxin disulfide + H(2)O = L-methionine (S)-S-oxide + thioredoxin.	Autism
291516108	Alistipes shahii WAL 8301	1.8.4.12	Peptide-methionine (R)-S-oxide reductase.	Peptide-L-methionine + thioredoxin disulfide + H(2)O = peptide-L-methionine (R)-S-oxide + thioredoxin.	Control
115252745	Peptoclostridium difficile 630	1.8.4.12	Peptide-methionine (R)-S-oxide reductase.	Peptide-L-methionine + thioredoxin disulfide + H(2)O = peptide-L-methionine (R)-S-oxide + thioredoxin.	Autism
291516108	Alistipes shahii WAL 8301	2.7.1.48	Uridine kinase.	(1) ATP + uridine = ADP + UMP.(2) ATP + cytidine = ADP + CMP.	Control
110676061	Clostridium perfringens ATCC 13124	2.7.1.48	Uridine kinase.	(1) ATP + uridine = ADP + UMP.(2) ATP + cytidine = ADP + CMP.	Autism
291516108	Alistipes shahii WAL 8301	2.7.1.48	Uridine kinase.	(1) ATP + uridine = ADP + UMP.(2) ATP + cytidine = ADP + CMP.	Control
115252745	Peptoclostridium difficile 630	2.7.1.48	Uridine kinase.	(1) ATP + uridine = ADP + UMP.(2) ATP + cytidine = ADP + CMP.	Autism
291516108	Alistipes shahii WAL 8301	5.99.1.3	DNA topoisomerase (ATP-hydrolyzing).	ATP-dependent breakage, passage and rejoining of double-stranded DNA.	Control
187426706	Akkermansia muciniphila ATCC BAA-835	5.99.1.3	DNA topoisomerase (ATP-hydrolyzing).	ATP-dependent breakage, passage and rejoining of double-stranded DNA.	Autism
291516108	Alistipes shahii WAL 8301	5.99.1.3	DNA topoisomerase (ATP-hydrolyzing).	ATP-dependent breakage, passage and rejoining of double-stranded DNA.	Control
187426706	Akkermansia muciniphila ATCC BAA-835	5.99.1.3	DNA topoisomerase (ATP-hydrolyzing).	ATP-dependent breakage, passage and rejoining of double-stranded DNA.	Autism
291516108	Alistipes shahii WAL 8301	5.99.1.3	DNA topoisomerase (ATP-hydrolyzing).	ATP-dependent breakage, passage and rejoining of double-stranded DNA.	Control
187426706	Akkermansia muciniphila ATCC BAA-835	5.99.1.3	DNA topoisomerase (ATP-hydrolyzing).	ATP-dependent breakage, passage and rejoining of double-stranded DNA.	Autism
291516108	Alistipes shahii WAL 8301	5.99.1.3	DNA topoisomerase (ATP-hydrolyzing).	ATP-dependent breakage, passage and rejoining of double-stranded DNA.	Control
110676061	Clostridium perfringens ATCC 13124	5.99.1.3	DNA topoisomerase (ATP-hydrolyzing).	ATP-dependent breakage, passage and rejoining of double-stranded DNA.	Autism
291516108	Alistipes shahii WAL 8301	5.99.1.3	DNA topoisomerase (ATP-hydrolyzing).	ATP-dependent breakage, passage and rejoining of double-stranded DNA.	Control
110676061	Clostridium perfringens ATCC 13124	5.99.1.3	DNA topoisomerase (ATP-hydrolyzing).	ATP-dependent breakage, passage and rejoining of double-stranded DNA.	Autism
291516108	Alistipes shahii WAL 8301	5.99.1.3	DNA topoisomerase (ATP-hydrolyzing).	ATP-dependent breakage, passage and rejoining of double-stranded DNA.	Control
219869941	Desulfovibrio desulfuricans ATCC 27774	5.99.1.3	DNA topoisomerase (ATP-hydrolyzing).	ATP-dependent breakage, passage and rejoining of double-stranded DNA.	Autism
291516108	Alistipes shahii WAL 8301	5.99.1.3	DNA topoisomerase (ATP-hydrolyzing).	ATP-dependent breakage, passage and rejoining of double-stranded DNA.	Control
219869941	Desulfovibrio desulfuricans ATCC 27774	5.99.1.3	DNA topoisomerase (ATP-hydrolyzing).	ATP-dependent breakage, passage and rejoining of double-stranded DNA.	Autism
291516108	Alistipes shahii WAL 8301	5.99.1.3	DNA topoisomerase (ATP-hydrolyzing).	ATP-dependent breakage, passage and rejoining of double-stranded DNA.	Control
115252745	Peptoclostridium difficile 630	5.99.1.3	DNA topoisomerase (ATP-hydrolyzing).	ATP-dependent breakage, passage and rejoining of double-stranded DNA.	Autism
291516108	Alistipes shahii WAL 8301	5.99.1.3	DNA topoisomerase (ATP-hydrolyzing).	ATP-dependent breakage, passage and rejoining of double-stranded DNA.	Control
115252745	Peptoclostridium difficile 630	5.99.1.3	DNA topoisomerase (ATP-hydrolyzing).	ATP-dependent breakage, passage and rejoining of double-stranded DNA.	Autism
291516108	Alistipes shahii WAL 8301	2.1.2.2	Phosphoribosylglycinamide formyltransferase.	10-formyltetrahydrofolate + N(1)-(5-phospho-D-ribosyl)glycinamide =tetrahydrofolate + N(2)-formyl-N(1)-(5-phospho-D-ribosyl)glycinamide.	Control
110676061	Clostridium perfringens ATCC 13124	2.1.2.2	Phosphoribosylglycinamide formyltransferase.	10-formyltetrahydrofolate + N(1)-(5-phospho-D-ribosyl)glycinamide =tetrahydrofolate + N(2)-formyl-N(1)-(5-phospho-D-ribosyl)glycinamide.	Autism
291516108	Alistipes shahii WAL 8301	2.1.2.2	Phosphoribosylglycinamide formyltransferase.	10-formyltetrahydrofolate + N(1)-(5-phospho-D-ribosyl)glycinamide =tetrahydrofolate + N(2)-formyl-N(1)-(5-phospho-D-ribosyl)glycinamide.	Control
115252745	Peptoclostridium difficile 630	2.1.2.2	Phosphoribosylglycinamide formyltransferase.	10-formyltetrahydrofolate + N(1)-(5-phospho-D-ribosyl)glycinamide =tetrahydrofolate + N(2)-formyl-N(1)-(5-phospho-D-ribosyl)glycinamide.	Autism
291516108	Alistipes shahii WAL 8301	5.2.1.8	Peptidylprolyl isomerase.	Peptidylproline (omega=180) = peptidylproline (omega=0).	Control
187426706	Akkermansia muciniphila ATCC BAA-835	5.2.1.8	Peptidylprolyl isomerase.	Peptidylproline (omega=180) = peptidylproline (omega=0).	Autism
291516108	Alistipes shahii WAL 8301	5.2.1.8	Peptidylprolyl isomerase.	Peptidylproline (omega=180) = peptidylproline (omega=0).	Control
187426706	Akkermansia muciniphila ATCC BAA-835	5.2.1.8	Peptidylprolyl isomerase.	Peptidylproline (omega=180) = peptidylproline (omega=0).	Autism
291516108	Alistipes shahii WAL 8301	5.2.1.8	Peptidylprolyl isomerase.	Peptidylproline (omega=180) = peptidylproline (omega=0).	Control
110676061	Clostridium perfringens ATCC 13124	5.2.1.8	Peptidylprolyl isomerase.	Peptidylproline (omega=180) = peptidylproline (omega=0).	Autism
291516108	Alistipes shahii WAL 8301	5.2.1.8	Peptidylprolyl isomerase.	Peptidylproline (omega=180) = peptidylproline (omega=0).	Control
110676061	Clostridium perfringens ATCC 13124	5.2.1.8	Peptidylprolyl isomerase.	Peptidylproline (omega=180) = peptidylproline (omega=0).	Autism
291516108	Alistipes shahii WAL 8301	5.2.1.8	Peptidylprolyl isomerase.	Peptidylproline (omega=180) = peptidylproline (omega=0).	Control
115252745	Peptoclostridium difficile 630	5.2.1.8	Peptidylprolyl isomerase.	Peptidylproline (omega=180) = peptidylproline (omega=0).	Autism
291516108	Alistipes shahii WAL 8301	5.2.1.8	Peptidylprolyl isomerase.	Peptidylproline (omega=180) = peptidylproline (omega=0).	Control
115252745	Peptoclostridium difficile 630	5.2.1.8	Peptidylprolyl isomerase.	Peptidylproline (omega=180) = peptidylproline (omega=0).	Autism
291516108	Alistipes shahii WAL 8301	5.2.1.8	Peptidylprolyl isomerase.	Peptidylproline (omega=180) = peptidylproline (omega=0).	Control
115252745	Peptoclostridium difficile 630	5.2.1.8	Peptidylprolyl isomerase.	Peptidylproline (omega=180) = peptidylproline (omega=0).	Autism
291516108	Alistipes shahii WAL 8301	5.2.1.8	Peptidylprolyl isomerase.	Peptidylproline (omega=180) = peptidylproline (omega=0).	Control
115252745	Peptoclostridium difficile 630	5.2.1.8	Peptidylprolyl isomerase.	Peptidylproline (omega=180) = peptidylproline (omega=0).	Autism
291516108	Alistipes shahii WAL 8301	5.2.1.8	Peptidylprolyl isomerase.	Peptidylproline (omega=180) = peptidylproline (omega=0).	Control
115252745	Peptoclostridium difficile 630	5.2.1.8	Peptidylprolyl isomerase.	Peptidylproline (omega=180) = peptidylproline (omega=0).	Autism
291516108	Alistipes shahii WAL 8301	3.2.2.20	DNA-3-methyladenine glycosylase I.	Hydrolysis of alkylated DNA, releasing 3-methyladenine.	Control
187426706	Akkermansia muciniphila ATCC BAA-835	3.2.2.20	DNA-3-methyladenine glycosylase I.	Hydrolysis of alkylated DNA, releasing 3-methyladenine.	Autism
291516108	Alistipes shahii WAL 8301	1.1.1.100	3-oxoacyl-[acyl-carrier-protein] reductase.	(3R)-3-hydroxyacyl-[acyl-carrier-protein] + NADP(+) = 3-oxoacyl-[acyl-carrier-protein] + NADPH.	Control
110676061	Clostridium perfringens ATCC 13124	1.1.1.100	3-oxoacyl-[acyl-carrier-protein] reductase.	(3R)-3-hydroxyacyl-[acyl-carrier-protein] + NADP(+) = 3-oxoacyl-[acyl-carrier-protein] + NADPH.	Autism
291516108	Alistipes shahii WAL 8301	1.1.1.100	3-oxoacyl-[acyl-carrier-protein] reductase.	(3R)-3-hydroxyacyl-[acyl-carrier-protein] + NADP(+) = 3-oxoacyl-[acyl-carrier-protein] + NADPH.	Control
115252745	Peptoclostridium difficile 630	1.1.1.100	3-oxoacyl-[acyl-carrier-protein] reductase.	(3R)-3-hydroxyacyl-[acyl-carrier-protein] + NADP(+) = 3-oxoacyl-[acyl-carrier-protein] + NADPH.	Autism
291516108	Alistipes shahii WAL 8301	1.1.1.100	3-oxoacyl-[acyl-carrier-protein] reductase.	(3R)-3-hydroxyacyl-[acyl-carrier-protein] + NADP(+) = 3-oxoacyl-[acyl-carrier-protein] + NADPH.	Control
115252745	Peptoclostridium difficile 630	1.1.1.100	3-oxoacyl-[acyl-carrier-protein] reductase.	(3R)-3-hydroxyacyl-[acyl-carrier-protein] + NADP(+) = 3-oxoacyl-[acyl-carrier-protein] + NADPH.	Autism
291516108	Alistipes shahii WAL 8301	2.1.2.1	Glycine hydroxymethyltransferase.	5,10-methylenetetrahydrofolate + glycine + H(2)O = tetrahydrofolate +L-serine.	Control
110676061	Clostridium perfringens ATCC 13124	2.1.2.1	Glycine hydroxymethyltransferase.	5,10-methylenetetrahydrofolate + glycine + H(2)O = tetrahydrofolate +L-serine.	Autism
291516108	Alistipes shahii WAL 8301	2.1.2.1	Glycine hydroxymethyltransferase.	5,10-methylenetetrahydrofolate + glycine + H(2)O = tetrahydrofolate +L-serine.	Control
219869941	Desulfovibrio desulfuricans ATCC 27774	2.1.2.1	Glycine hydroxymethyltransferase.	5,10-methylenetetrahydrofolate + glycine + H(2)O = tetrahydrofolate +L-serine.	Autism
291516108	Alistipes shahii WAL 8301	2.1.2.1	Glycine hydroxymethyltransferase.	5,10-methylenetetrahydrofolate + glycine + H(2)O = tetrahydrofolate +L-serine.	Control
115252745	Peptoclostridium difficile 630	2.1.2.1	Glycine hydroxymethyltransferase.	5,10-methylenetetrahydrofolate + glycine + H(2)O = tetrahydrofolate +L-serine.	Autism
291516108	Alistipes shahii WAL 8301	2.1.2.1	Glycine hydroxymethyltransferase.	5,10-methylenetetrahydrofolate + glycine + H(2)O = tetrahydrofolate +L-serine.	Control
115252745	Peptoclostridium difficile 630	2.1.2.1	Glycine hydroxymethyltransferase.	5,10-methylenetetrahydrofolate + glycine + H(2)O = tetrahydrofolate +L-serine.	Autism
291516108	Alistipes shahii WAL 8301	2.6.1.16	Glutamine--fructose-6-phosphate transaminase (isomerizing).	L-glutamine + D-fructose 6-phosphate = L-glutamate + D-glucosamine6-phosphate.	Control
110676061	Clostridium perfringens ATCC 13124	2.6.1.16	Glutamine--fructose-6-phosphate transaminase (isomerizing).	L-glutamine + D-fructose 6-phosphate = L-glutamate + D-glucosamine6-phosphate.	Autism
291516108	Alistipes shahii WAL 8301	2.6.1.16	Glutamine--fructose-6-phosphate transaminase (isomerizing).	L-glutamine + D-fructose 6-phosphate = L-glutamate + D-glucosamine6-phosphate.	Control
115252745	Peptoclostridium difficile 630	2.6.1.16	Glutamine--fructose-6-phosphate transaminase (isomerizing).	L-glutamine + D-fructose 6-phosphate = L-glutamate + D-glucosamine6-phosphate.	Autism
291516108	Alistipes shahii WAL 8301	3.1.3.25	Inositol-phosphate phosphatase.	Myo-inositol phosphate + H(2)O = myo-inositol + phosphate.	Control
187426706	Akkermansia muciniphila ATCC BAA-835	3.1.3.25	Inositol-phosphate phosphatase.	Myo-inositol phosphate + H(2)O = myo-inositol + phosphate.	Autism
291516108	Alistipes shahii WAL 8301	3.1.3.25	Inositol-phosphate phosphatase.	Myo-inositol phosphate + H(2)O = myo-inositol + phosphate.	Control
219869941	Desulfovibrio desulfuricans ATCC 27774	3.1.3.25	Inositol-phosphate phosphatase.	Myo-inositol phosphate + H(2)O = myo-inositol + phosphate.	Autism
291516108	Alistipes shahii WAL 8301	3.1.3.25	Inositol-phosphate phosphatase.	Myo-inositol phosphate + H(2)O = myo-inositol + phosphate.	Control
219869941	Desulfovibrio desulfuricans ATCC 27774	3.1.3.25	Inositol-phosphate phosphatase.	Myo-inositol phosphate + H(2)O = myo-inositol + phosphate.	Autism
291516108	Alistipes shahii WAL 8301	5.4.2.8	Phosphomannomutase.	Alpha-D-mannose 1-phosphate = D-mannose 6-phosphate.	Control
219869941	Desulfovibrio desulfuricans ATCC 27774	5.4.2.8	Phosphomannomutase.	Alpha-D-mannose 1-phosphate = D-mannose 6-phosphate.	Autism
291516108	Alistipes shahii WAL 8301	2.4.2.3	Uridine phosphorylase.	Uridine + phosphate = uracil + alpha-D-ribose 1-phosphate.	Control
110676061	Clostridium perfringens ATCC 13124	2.4.2.3	Uridine phosphorylase.	Uridine + phosphate = uracil + alpha-D-ribose 1-phosphate.	Autism
291516108	Alistipes shahii WAL 8301	2.7.7.7	DNA-directed DNA polymerase.	Deoxynucleoside triphosphate + DNA(n) = diphosphate + DNA(n+1).	Control
187426706	Akkermansia muciniphila ATCC BAA-835	2.7.7.7	DNA-directed DNA polymerase.	Deoxynucleoside triphosphate + DNA(n) = diphosphate + DNA(n+1).	Autism
291516108	Alistipes shahii WAL 8301	2.7.7.7	DNA-directed DNA polymerase.	Deoxynucleoside triphosphate + DNA(n) = diphosphate + DNA(n+1).	Control
187426706	Akkermansia muciniphila ATCC BAA-835	2.7.7.7	DNA-directed DNA polymerase.	Deoxynucleoside triphosphate + DNA(n) = diphosphate + DNA(n+1).	Autism
291516108	Alistipes shahii WAL 8301	2.7.7.7	DNA-directed DNA polymerase.	Deoxynucleoside triphosphate + DNA(n) = diphosphate + DNA(n+1).	Control
187426706	Akkermansia muciniphila ATCC BAA-835	2.7.7.7	DNA-directed DNA polymerase.	Deoxynucleoside triphosphate + DNA(n) = diphosphate + DNA(n+1).	Autism
291516108	Alistipes shahii WAL 8301	2.7.7.7	DNA-directed DNA polymerase.	Deoxynucleoside triphosphate + DNA(n) = diphosphate + DNA(n+1).	Control
187426706	Akkermansia muciniphila ATCC BAA-835	2.7.7.7	DNA-directed DNA polymerase.	Deoxynucleoside triphosphate + DNA(n) = diphosphate + DNA(n+1).	Autism
291516108	Alistipes shahii WAL 8301	2.7.7.7	DNA-directed DNA polymerase.	Deoxynucleoside triphosphate + DNA(n) = diphosphate + DNA(n+1).	Control
187426706	Akkermansia muciniphila ATCC BAA-835	2.7.7.7	DNA-directed DNA polymerase.	Deoxynucleoside triphosphate + DNA(n) = diphosphate + DNA(n+1).	Autism
291516108	Alistipes shahii WAL 8301	2.7.7.7	DNA-directed DNA polymerase.	Deoxynucleoside triphosphate + DNA(n) = diphosphate + DNA(n+1).	Control
110676061	Clostridium perfringens ATCC 13124	2.7.7.7	DNA-directed DNA polymerase.	Deoxynucleoside triphosphate + DNA(n) = diphosphate + DNA(n+1).	Autism
291516108	Alistipes shahii WAL 8301	2.7.7.7	DNA-directed DNA polymerase.	Deoxynucleoside triphosphate + DNA(n) = diphosphate + DNA(n+1).	Control
110676061	Clostridium perfringens ATCC 13124	2.7.7.7	DNA-directed DNA polymerase.	Deoxynucleoside triphosphate + DNA(n) = diphosphate + DNA(n+1).	Autism
291516108	Alistipes shahii WAL 8301	2.7.7.7	DNA-directed DNA polymerase.	Deoxynucleoside triphosphate + DNA(n) = diphosphate + DNA(n+1).	Control
110676061	Clostridium perfringens ATCC 13124	2.7.7.7	DNA-directed DNA polymerase.	Deoxynucleoside triphosphate + DNA(n) = diphosphate + DNA(n+1).	Autism
291516108	Alistipes shahii WAL 8301	2.7.7.7	DNA-directed DNA polymerase.	Deoxynucleoside triphosphate + DNA(n) = diphosphate + DNA(n+1).	Control
110676061	Clostridium perfringens ATCC 13124	2.7.7.7	DNA-directed DNA polymerase.	Deoxynucleoside triphosphate + DNA(n) = diphosphate + DNA(n+1).	Autism
291516108	Alistipes shahii WAL 8301	2.7.7.7	DNA-directed DNA polymerase.	Deoxynucleoside triphosphate + DNA(n) = diphosphate + DNA(n+1).	Control
110676061	Clostridium perfringens ATCC 13124	2.7.7.7	DNA-directed DNA polymerase.	Deoxynucleoside triphosphate + DNA(n) = diphosphate + DNA(n+1).	Autism
291516108	Alistipes shahii WAL 8301	2.7.7.7	DNA-directed DNA polymerase.	Deoxynucleoside triphosphate + DNA(n) = diphosphate + DNA(n+1).	Control
110676061	Clostridium perfringens ATCC 13124	2.7.7.7	DNA-directed DNA polymerase.	Deoxynucleoside triphosphate + DNA(n) = diphosphate + DNA(n+1).	Autism
291516108	Alistipes shahii WAL 8301	2.7.7.7	DNA-directed DNA polymerase.	Deoxynucleoside triphosphate + DNA(n) = diphosphate + DNA(n+1).	Control
219869941	Desulfovibrio desulfuricans ATCC 27774	2.7.7.7	DNA-directed DNA polymerase.	Deoxynucleoside triphosphate + DNA(n) = diphosphate + DNA(n+1).	Autism
291516108	Alistipes shahii WAL 8301	2.7.7.7	DNA-directed DNA polymerase.	Deoxynucleoside triphosphate + DNA(n) = diphosphate + DNA(n+1).	Control
219869941	Desulfovibrio desulfuricans ATCC 27774	2.7.7.7	DNA-directed DNA polymerase.	Deoxynucleoside triphosphate + DNA(n) = diphosphate + DNA(n+1).	Autism
291516108	Alistipes shahii WAL 8301	2.7.7.7	DNA-directed DNA polymerase.	Deoxynucleoside triphosphate + DNA(n) = diphosphate + DNA(n+1).	Control
219869941	Desulfovibrio desulfuricans ATCC 27774	2.7.7.7	DNA-directed DNA polymerase.	Deoxynucleoside triphosphate + DNA(n) = diphosphate + DNA(n+1).	Autism
291516108	Alistipes shahii WAL 8301	2.7.7.7	DNA-directed DNA polymerase.	Deoxynucleoside triphosphate + DNA(n) = diphosphate + DNA(n+1).	Control
219869941	Desulfovibrio desulfuricans ATCC 27774	2.7.7.7	DNA-directed DNA polymerase.	Deoxynucleoside triphosphate + DNA(n) = diphosphate + DNA(n+1).	Autism
291516108	Alistipes shahii WAL 8301	2.7.7.7	DNA-directed DNA polymerase.	Deoxynucleoside triphosphate + DNA(n) = diphosphate + DNA(n+1).	Control
219869941	Desulfovibrio desulfuricans ATCC 27774	2.7.7.7	DNA-directed DNA polymerase.	Deoxynucleoside triphosphate + DNA(n) = diphosphate + DNA(n+1).	Autism
291516108	Alistipes shahii WAL 8301	2.7.7.7	DNA-directed DNA polymerase.	Deoxynucleoside triphosphate + DNA(n) = diphosphate + DNA(n+1).	Control
115252745	Peptoclostridium difficile 630	2.7.7.7	DNA-directed DNA polymerase.	Deoxynucleoside triphosphate + DNA(n) = diphosphate + DNA(n+1).	Autism
291516108	Alistipes shahii WAL 8301	2.7.7.7	DNA-directed DNA polymerase.	Deoxynucleoside triphosphate + DNA(n) = diphosphate + DNA(n+1).	Control
115252745	Peptoclostridium difficile 630	2.7.7.7	DNA-directed DNA polymerase.	Deoxynucleoside triphosphate + DNA(n) = diphosphate + DNA(n+1).	Autism
291516108	Alistipes shahii WAL 8301	2.7.7.7	DNA-directed DNA polymerase.	Deoxynucleoside triphosphate + DNA(n) = diphosphate + DNA(n+1).	Control
115252745	Peptoclostridium difficile 630	2.7.7.7	DNA-directed DNA polymerase.	Deoxynucleoside triphosphate + DNA(n) = diphosphate + DNA(n+1).	Autism
291516108	Alistipes shahii WAL 8301	2.7.7.7	DNA-directed DNA polymerase.	Deoxynucleoside triphosphate + DNA(n) = diphosphate + DNA(n+1).	Control
115252745	Peptoclostridium difficile 630	2.7.7.7	DNA-directed DNA polymerase.	Deoxynucleoside triphosphate + DNA(n) = diphosphate + DNA(n+1).	Autism
291516108	Alistipes shahii WAL 8301	2.7.7.7	DNA-directed DNA polymerase.	Deoxynucleoside triphosphate + DNA(n) = diphosphate + DNA(n+1).	Control
115252745	Peptoclostridium difficile 630	2.7.7.7	DNA-directed DNA polymerase.	Deoxynucleoside triphosphate + DNA(n) = diphosphate + DNA(n+1).	Autism
291516108	Alistipes shahii WAL 8301	2.7.7.7	DNA-directed DNA polymerase.	Deoxynucleoside triphosphate + DNA(n) = diphosphate + DNA(n+1).	Control
115252745	Peptoclostridium difficile 630	2.7.7.7	DNA-directed DNA polymerase.	Deoxynucleoside triphosphate + DNA(n) = diphosphate + DNA(n+1).	Autism
291516108	Alistipes shahii WAL 8301	2.7.7.7	DNA-directed DNA polymerase.	Deoxynucleoside triphosphate + DNA(n) = diphosphate + DNA(n+1).	Control
115252745	Peptoclostridium difficile 630	2.7.7.7	DNA-directed DNA polymerase.	Deoxynucleoside triphosphate + DNA(n) = diphosphate + DNA(n+1).	Autism
291516108	Alistipes shahii WAL 8301	2.7.7.7	DNA-directed DNA polymerase.	Deoxynucleoside triphosphate + DNA(n) = diphosphate + DNA(n+1).	Control
115252745	Peptoclostridium difficile 630	2.7.7.7	DNA-directed DNA polymerase.	Deoxynucleoside triphosphate + DNA(n) = diphosphate + DNA(n+1).	Autism
291516108	Alistipes shahii WAL 8301	2.7.7.7	DNA-directed DNA polymerase.	Deoxynucleoside triphosphate + DNA(n) = diphosphate + DNA(n+1).	Control
187426706	Akkermansia muciniphila ATCC BAA-835	2.7.7.7	DNA-directed DNA polymerase.	Deoxynucleoside triphosphate + DNA(n) = diphosphate + DNA(n+1).	Autism
291516108	Alistipes shahii WAL 8301	2.7.7.7	DNA-directed DNA polymerase.	Deoxynucleoside triphosphate + DNA(n) = diphosphate + DNA(n+1).	Control
187426706	Akkermansia muciniphila ATCC BAA-835	2.7.7.7	DNA-directed DNA polymerase.	Deoxynucleoside triphosphate + DNA(n) = diphosphate + DNA(n+1).	Autism
291516108	Alistipes shahii WAL 8301	2.7.7.7	DNA-directed DNA polymerase.	Deoxynucleoside triphosphate + DNA(n) = diphosphate + DNA(n+1).	Control
187426706	Akkermansia muciniphila ATCC BAA-835	2.7.7.7	DNA-directed DNA polymerase.	Deoxynucleoside triphosphate + DNA(n) = diphosphate + DNA(n+1).	Autism
291516108	Alistipes shahii WAL 8301	2.7.7.7	DNA-directed DNA polymerase.	Deoxynucleoside triphosphate + DNA(n) = diphosphate + DNA(n+1).	Control
187426706	Akkermansia muciniphila ATCC BAA-835	2.7.7.7	DNA-directed DNA polymerase.	Deoxynucleoside triphosphate + DNA(n) = diphosphate + DNA(n+1).	Autism
291516108	Alistipes shahii WAL 8301	2.7.7.7	DNA-directed DNA polymerase.	Deoxynucleoside triphosphate + DNA(n) = diphosphate + DNA(n+1).	Control
187426706	Akkermansia muciniphila ATCC BAA-835	2.7.7.7	DNA-directed DNA polymerase.	Deoxynucleoside triphosphate + DNA(n) = diphosphate + DNA(n+1).	Autism
291516108	Alistipes shahii WAL 8301	2.7.7.7	DNA-directed DNA polymerase.	Deoxynucleoside triphosphate + DNA(n) = diphosphate + DNA(n+1).	Control
110676061	Clostridium perfringens ATCC 13124	2.7.7.7	DNA-directed DNA polymerase.	Deoxynucleoside triphosphate + DNA(n) = diphosphate + DNA(n+1).	Autism
291516108	Alistipes shahii WAL 8301	2.7.7.7	DNA-directed DNA polymerase.	Deoxynucleoside triphosphate + DNA(n) = diphosphate + DNA(n+1).	Control
110676061	Clostridium perfringens ATCC 13124	2.7.7.7	DNA-directed DNA polymerase.	Deoxynucleoside triphosphate + DNA(n) = diphosphate + DNA(n+1).	Autism
291516108	Alistipes shahii WAL 8301	2.7.7.7	DNA-directed DNA polymerase.	Deoxynucleoside triphosphate + DNA(n) = diphosphate + DNA(n+1).	Control
110676061	Clostridium perfringens ATCC 13124	2.7.7.7	DNA-directed DNA polymerase.	Deoxynucleoside triphosphate + DNA(n) = diphosphate + DNA(n+1).	Autism
291516108	Alistipes shahii WAL 8301	2.7.7.7	DNA-directed DNA polymerase.	Deoxynucleoside triphosphate + DNA(n) = diphosphate + DNA(n+1).	Control
110676061	Clostridium perfringens ATCC 13124	2.7.7.7	DNA-directed DNA polymerase.	Deoxynucleoside triphosphate + DNA(n) = diphosphate + DNA(n+1).	Autism
291516108	Alistipes shahii WAL 8301	2.7.7.7	DNA-directed DNA polymerase.	Deoxynucleoside triphosphate + DNA(n) = diphosphate + DNA(n+1).	Control
110676061	Clostridium perfringens ATCC 13124	2.7.7.7	DNA-directed DNA polymerase.	Deoxynucleoside triphosphate + DNA(n) = diphosphate + DNA(n+1).	Autism
291516108	Alistipes shahii WAL 8301	2.7.7.7	DNA-directed DNA polymerase.	Deoxynucleoside triphosphate + DNA(n) = diphosphate + DNA(n+1).	Control
110676061	Clostridium perfringens ATCC 13124	2.7.7.7	DNA-directed DNA polymerase.	Deoxynucleoside triphosphate + DNA(n) = diphosphate + DNA(n+1).	Autism
291516108	Alistipes shahii WAL 8301	2.7.7.7	DNA-directed DNA polymerase.	Deoxynucleoside triphosphate + DNA(n) = diphosphate + DNA(n+1).	Control
219869941	Desulfovibrio desulfuricans ATCC 27774	2.7.7.7	DNA-directed DNA polymerase.	Deoxynucleoside triphosphate + DNA(n) = diphosphate + DNA(n+1).	Autism
291516108	Alistipes shahii WAL 8301	2.7.7.7	DNA-directed DNA polymerase.	Deoxynucleoside triphosphate + DNA(n) = diphosphate + DNA(n+1).	Control
219869941	Desulfovibrio desulfuricans ATCC 27774	2.7.7.7	DNA-directed DNA polymerase.	Deoxynucleoside triphosphate + DNA(n) = diphosphate + DNA(n+1).	Autism
291516108	Alistipes shahii WAL 8301	2.7.7.7	DNA-directed DNA polymerase.	Deoxynucleoside triphosphate + DNA(n) = diphosphate + DNA(n+1).	Control
219869941	Desulfovibrio desulfuricans ATCC 27774	2.7.7.7	DNA-directed DNA polymerase.	Deoxynucleoside triphosphate + DNA(n) = diphosphate + DNA(n+1).	Autism
291516108	Alistipes shahii WAL 8301	2.7.7.7	DNA-directed DNA polymerase.	Deoxynucleoside triphosphate + DNA(n) = diphosphate + DNA(n+1).	Control
219869941	Desulfovibrio desulfuricans ATCC 27774	2.7.7.7	DNA-directed DNA polymerase.	Deoxynucleoside triphosphate + DNA(n) = diphosphate + DNA(n+1).	Autism
291516108	Alistipes shahii WAL 8301	2.7.7.7	DNA-directed DNA polymerase.	Deoxynucleoside triphosphate + DNA(n) = diphosphate + DNA(n+1).	Control
219869941	Desulfovibrio desulfuricans ATCC 27774	2.7.7.7	DNA-directed DNA polymerase.	Deoxynucleoside triphosphate + DNA(n) = diphosphate + DNA(n+1).	Autism
291516108	Alistipes shahii WAL 8301	2.7.7.7	DNA-directed DNA polymerase.	Deoxynucleoside triphosphate + DNA(n) = diphosphate + DNA(n+1).	Control
115252745	Peptoclostridium difficile 630	2.7.7.7	DNA-directed DNA polymerase.	Deoxynucleoside triphosphate + DNA(n) = diphosphate + DNA(n+1).	Autism
291516108	Alistipes shahii WAL 8301	2.7.7.7	DNA-directed DNA polymerase.	Deoxynucleoside triphosphate + DNA(n) = diphosphate + DNA(n+1).	Control
115252745	Peptoclostridium difficile 630	2.7.7.7	DNA-directed DNA polymerase.	Deoxynucleoside triphosphate + DNA(n) = diphosphate + DNA(n+1).	Autism
291516108	Alistipes shahii WAL 8301	2.7.7.7	DNA-directed DNA polymerase.	Deoxynucleoside triphosphate + DNA(n) = diphosphate + DNA(n+1).	Control
115252745	Peptoclostridium difficile 630	2.7.7.7	DNA-directed DNA polymerase.	Deoxynucleoside triphosphate + DNA(n) = diphosphate + DNA(n+1).	Autism
291516108	Alistipes shahii WAL 8301	2.7.7.7	DNA-directed DNA polymerase.	Deoxynucleoside triphosphate + DNA(n) = diphosphate + DNA(n+1).	Control
115252745	Peptoclostridium difficile 630	2.7.7.7	DNA-directed DNA polymerase.	Deoxynucleoside triphosphate + DNA(n) = diphosphate + DNA(n+1).	Autism
291516108	Alistipes shahii WAL 8301	2.7.7.7	DNA-directed DNA polymerase.	Deoxynucleoside triphosphate + DNA(n) = diphosphate + DNA(n+1).	Control
115252745	Peptoclostridium difficile 630	2.7.7.7	DNA-directed DNA polymerase.	Deoxynucleoside triphosphate + DNA(n) = diphosphate + DNA(n+1).	Autism
291516108	Alistipes shahii WAL 8301	2.7.7.7	DNA-directed DNA polymerase.	Deoxynucleoside triphosphate + DNA(n) = diphosphate + DNA(n+1).	Control
115252745	Peptoclostridium difficile 630	2.7.7.7	DNA-directed DNA polymerase.	Deoxynucleoside triphosphate + DNA(n) = diphosphate + DNA(n+1).	Autism
291516108	Alistipes shahii WAL 8301	2.7.7.7	DNA-directed DNA polymerase.	Deoxynucleoside triphosphate + DNA(n) = diphosphate + DNA(n+1).	Control
115252745	Peptoclostridium difficile 630	2.7.7.7	DNA-directed DNA polymerase.	Deoxynucleoside triphosphate + DNA(n) = diphosphate + DNA(n+1).	Autism
291516108	Alistipes shahii WAL 8301	2.7.7.7	DNA-directed DNA polymerase.	Deoxynucleoside triphosphate + DNA(n) = diphosphate + DNA(n+1).	Control
115252745	Peptoclostridium difficile 630	2.7.7.7	DNA-directed DNA polymerase.	Deoxynucleoside triphosphate + DNA(n) = diphosphate + DNA(n+1).	Autism
291516108	Alistipes shahii WAL 8301	2.7.7.7	DNA-directed DNA polymerase.	Deoxynucleoside triphosphate + DNA(n) = diphosphate + DNA(n+1).	Control
187426706	Akkermansia muciniphila ATCC BAA-835	2.7.7.7	DNA-directed DNA polymerase.	Deoxynucleoside triphosphate + DNA(n) = diphosphate + DNA(n+1).	Autism
291516108	Alistipes shahii WAL 8301	2.7.7.7	DNA-directed DNA polymerase.	Deoxynucleoside triphosphate + DNA(n) = diphosphate + DNA(n+1).	Control
187426706	Akkermansia muciniphila ATCC BAA-835	2.7.7.7	DNA-directed DNA polymerase.	Deoxynucleoside triphosphate + DNA(n) = diphosphate + DNA(n+1).	Autism
291516108	Alistipes shahii WAL 8301	2.7.7.7	DNA-directed DNA polymerase.	Deoxynucleoside triphosphate + DNA(n) = diphosphate + DNA(n+1).	Control
187426706	Akkermansia muciniphila ATCC BAA-835	2.7.7.7	DNA-directed DNA polymerase.	Deoxynucleoside triphosphate + DNA(n) = diphosphate + DNA(n+1).	Autism
291516108	Alistipes shahii WAL 8301	2.7.7.7	DNA-directed DNA polymerase.	Deoxynucleoside triphosphate + DNA(n) = diphosphate + DNA(n+1).	Control
187426706	Akkermansia muciniphila ATCC BAA-835	2.7.7.7	DNA-directed DNA polymerase.	Deoxynucleoside triphosphate + DNA(n) = diphosphate + DNA(n+1).	Autism
291516108	Alistipes shahii WAL 8301	2.7.7.7	DNA-directed DNA polymerase.	Deoxynucleoside triphosphate + DNA(n) = diphosphate + DNA(n+1).	Control
187426706	Akkermansia muciniphila ATCC BAA-835	2.7.7.7	DNA-directed DNA polymerase.	Deoxynucleoside triphosphate + DNA(n) = diphosphate + DNA(n+1).	Autism
291516108	Alistipes shahii WAL 8301	2.7.7.7	DNA-directed DNA polymerase.	Deoxynucleoside triphosphate + DNA(n) = diphosphate + DNA(n+1).	Control
110676061	Clostridium perfringens ATCC 13124	2.7.7.7	DNA-directed DNA polymerase.	Deoxynucleoside triphosphate + DNA(n) = diphosphate + DNA(n+1).	Autism
291516108	Alistipes shahii WAL 8301	2.7.7.7	DNA-directed DNA polymerase.	Deoxynucleoside triphosphate + DNA(n) = diphosphate + DNA(n+1).	Control
110676061	Clostridium perfringens ATCC 13124	2.7.7.7	DNA-directed DNA polymerase.	Deoxynucleoside triphosphate + DNA(n) = diphosphate + DNA(n+1).	Autism
291516108	Alistipes shahii WAL 8301	2.7.7.7	DNA-directed DNA polymerase.	Deoxynucleoside triphosphate + DNA(n) = diphosphate + DNA(n+1).	Control
110676061	Clostridium perfringens ATCC 13124	2.7.7.7	DNA-directed DNA polymerase.	Deoxynucleoside triphosphate + DNA(n) = diphosphate + DNA(n+1).	Autism
291516108	Alistipes shahii WAL 8301	2.7.7.7	DNA-directed DNA polymerase.	Deoxynucleoside triphosphate + DNA(n) = diphosphate + DNA(n+1).	Control
110676061	Clostridium perfringens ATCC 13124	2.7.7.7	DNA-directed DNA polymerase.	Deoxynucleoside triphosphate + DNA(n) = diphosphate + DNA(n+1).	Autism
291516108	Alistipes shahii WAL 8301	2.7.7.7	DNA-directed DNA polymerase.	Deoxynucleoside triphosphate + DNA(n) = diphosphate + DNA(n+1).	Control
110676061	Clostridium perfringens ATCC 13124	2.7.7.7	DNA-directed DNA polymerase.	Deoxynucleoside triphosphate + DNA(n) = diphosphate + DNA(n+1).	Autism
291516108	Alistipes shahii WAL 8301	2.7.7.7	DNA-directed DNA polymerase.	Deoxynucleoside triphosphate + DNA(n) = diphosphate + DNA(n+1).	Control
110676061	Clostridium perfringens ATCC 13124	2.7.7.7	DNA-directed DNA polymerase.	Deoxynucleoside triphosphate + DNA(n) = diphosphate + DNA(n+1).	Autism
291516108	Alistipes shahii WAL 8301	2.7.7.7	DNA-directed DNA polymerase.	Deoxynucleoside triphosphate + DNA(n) = diphosphate + DNA(n+1).	Control
219869941	Desulfovibrio desulfuricans ATCC 27774	2.7.7.7	DNA-directed DNA polymerase.	Deoxynucleoside triphosphate + DNA(n) = diphosphate + DNA(n+1).	Autism
291516108	Alistipes shahii WAL 8301	2.7.7.7	DNA-directed DNA polymerase.	Deoxynucleoside triphosphate + DNA(n) = diphosphate + DNA(n+1).	Control
219869941	Desulfovibrio desulfuricans ATCC 27774	2.7.7.7	DNA-directed DNA polymerase.	Deoxynucleoside triphosphate + DNA(n) = diphosphate + DNA(n+1).	Autism
291516108	Alistipes shahii WAL 8301	2.7.7.7	DNA-directed DNA polymerase.	Deoxynucleoside triphosphate + DNA(n) = diphosphate + DNA(n+1).	Control
219869941	Desulfovibrio desulfuricans ATCC 27774	2.7.7.7	DNA-directed DNA polymerase.	Deoxynucleoside triphosphate + DNA(n) = diphosphate + DNA(n+1).	Autism
291516108	Alistipes shahii WAL 8301	2.7.7.7	DNA-directed DNA polymerase.	Deoxynucleoside triphosphate + DNA(n) = diphosphate + DNA(n+1).	Control
219869941	Desulfovibrio desulfuricans ATCC 27774	2.7.7.7	DNA-directed DNA polymerase.	Deoxynucleoside triphosphate + DNA(n) = diphosphate + DNA(n+1).	Autism
291516108	Alistipes shahii WAL 8301	2.7.7.7	DNA-directed DNA polymerase.	Deoxynucleoside triphosphate + DNA(n) = diphosphate + DNA(n+1).	Control
219869941	Desulfovibrio desulfuricans ATCC 27774	2.7.7.7	DNA-directed DNA polymerase.	Deoxynucleoside triphosphate + DNA(n) = diphosphate + DNA(n+1).	Autism
291516108	Alistipes shahii WAL 8301	2.7.7.7	DNA-directed DNA polymerase.	Deoxynucleoside triphosphate + DNA(n) = diphosphate + DNA(n+1).	Control
115252745	Peptoclostridium difficile 630	2.7.7.7	DNA-directed DNA polymerase.	Deoxynucleoside triphosphate + DNA(n) = diphosphate + DNA(n+1).	Autism
291516108	Alistipes shahii WAL 8301	2.7.7.7	DNA-directed DNA polymerase.	Deoxynucleoside triphosphate + DNA(n) = diphosphate + DNA(n+1).	Control
115252745	Peptoclostridium difficile 630	2.7.7.7	DNA-directed DNA polymerase.	Deoxynucleoside triphosphate + DNA(n) = diphosphate + DNA(n+1).	Autism
291516108	Alistipes shahii WAL 8301	2.7.7.7	DNA-directed DNA polymerase.	Deoxynucleoside triphosphate + DNA(n) = diphosphate + DNA(n+1).	Control
115252745	Peptoclostridium difficile 630	2.7.7.7	DNA-directed DNA polymerase.	Deoxynucleoside triphosphate + DNA(n) = diphosphate + DNA(n+1).	Autism
291516108	Alistipes shahii WAL 8301	2.7.7.7	DNA-directed DNA polymerase.	Deoxynucleoside triphosphate + DNA(n) = diphosphate + DNA(n+1).	Control
115252745	Peptoclostridium difficile 630	2.7.7.7	DNA-directed DNA polymerase.	Deoxynucleoside triphosphate + DNA(n) = diphosphate + DNA(n+1).	Autism
291516108	Alistipes shahii WAL 8301	2.7.7.7	DNA-directed DNA polymerase.	Deoxynucleoside triphosphate + DNA(n) = diphosphate + DNA(n+1).	Control
115252745	Peptoclostridium difficile 630	2.7.7.7	DNA-directed DNA polymerase.	Deoxynucleoside triphosphate + DNA(n) = diphosphate + DNA(n+1).	Autism
291516108	Alistipes shahii WAL 8301	2.7.7.7	DNA-directed DNA polymerase.	Deoxynucleoside triphosphate + DNA(n) = diphosphate + DNA(n+1).	Control
115252745	Peptoclostridium difficile 630	2.7.7.7	DNA-directed DNA polymerase.	Deoxynucleoside triphosphate + DNA(n) = diphosphate + DNA(n+1).	Autism
291516108	Alistipes shahii WAL 8301	2.7.7.7	DNA-directed DNA polymerase.	Deoxynucleoside triphosphate + DNA(n) = diphosphate + DNA(n+1).	Control
115252745	Peptoclostridium difficile 630	2.7.7.7	DNA-directed DNA polymerase.	Deoxynucleoside triphosphate + DNA(n) = diphosphate + DNA(n+1).	Autism
291516108	Alistipes shahii WAL 8301	2.7.7.7	DNA-directed DNA polymerase.	Deoxynucleoside triphosphate + DNA(n) = diphosphate + DNA(n+1).	Control
115252745	Peptoclostridium difficile 630	2.7.7.7	DNA-directed DNA polymerase.	Deoxynucleoside triphosphate + DNA(n) = diphosphate + DNA(n+1).	Autism
291516108	Alistipes shahii WAL 8301	1.1.1.25	Shikimate dehydrogenase.	Shikimate + NADP(+) = 3-dehydroshikimate + NADPH.	Control
110676061	Clostridium perfringens ATCC 13124	1.1.1.25	Shikimate dehydrogenase.	Shikimate + NADP(+) = 3-dehydroshikimate + NADPH.	Autism
291516108	Alistipes shahii WAL 8301	1.1.1.25	Shikimate dehydrogenase.	Shikimate + NADP(+) = 3-dehydroshikimate + NADPH.	Control
115252745	Peptoclostridium difficile 630	1.1.1.25	Shikimate dehydrogenase.	Shikimate + NADP(+) = 3-dehydroshikimate + NADPH.	Autism
291516108	Alistipes shahii WAL 8301	1.1.1.25	Shikimate dehydrogenase.	Shikimate + NADP(+) = 3-dehydroshikimate + NADPH.	Control
115252745	Peptoclostridium difficile 630	1.1.1.25	Shikimate dehydrogenase.	Shikimate + NADP(+) = 3-dehydroshikimate + NADPH.	Autism
291516108	Alistipes shahii WAL 8301	3.4.21.102	C-terminal processing peptidase.	The enzyme shows specific recognition of a C-terminal tripeptide, Xaa-Yaa-Zaa, in which Xaa is preferably Ala or Leu, Yaa is preferably Ala orTyr, and Zaa is preferably Ala, but then cleaves at a variable distancefrom the C-terminus. A typical cleavage is -Ala-Ala-|-Arg-Ala-Ala-Lys-Glu-Asn-Tyr-Ala-L	Control
187426706	Akkermansia muciniphila ATCC BAA-835	3.4.21.102	C-terminal processing peptidase.	The enzyme shows specific recognition of a C-terminal tripeptide, Xaa-Yaa-Zaa, in which Xaa is preferably Ala or Leu, Yaa is preferably Ala orTyr, and Zaa is preferably Ala, but then cleaves at a variable distancefrom the C-terminus. A typical cleavage is -Ala-Ala-|-Arg-Ala-Ala-Lys-Glu-Asn-Tyr-Ala-L	Autism
291516108	Alistipes shahii WAL 8301	3.4.21.102	C-terminal processing peptidase.	The enzyme shows specific recognition of a C-terminal tripeptide, Xaa-Yaa-Zaa, in which Xaa is preferably Ala or Leu, Yaa is preferably Ala orTyr, and Zaa is preferably Ala, but then cleaves at a variable distancefrom the C-terminus. A typical cleavage is -Ala-Ala-|-Arg-Ala-Ala-Lys-Glu-Asn-Tyr-Ala-L	Control
219869941	Desulfovibrio desulfuricans ATCC 27774	3.4.21.102	C-terminal processing peptidase.	The enzyme shows specific recognition of a C-terminal tripeptide, Xaa-Yaa-Zaa, in which Xaa is preferably Ala or Leu, Yaa is preferably Ala orTyr, and Zaa is preferably Ala, but then cleaves at a variable distancefrom the C-terminus. A typical cleavage is -Ala-Ala-|-Arg-Ala-Ala-Lys-Glu-Asn-Tyr-Ala-L	Autism
291516108	Alistipes shahii WAL 8301	3.4.21.102	C-terminal processing peptidase.	The enzyme shows specific recognition of a C-terminal tripeptide, Xaa-Yaa-Zaa, in which Xaa is preferably Ala or Leu, Yaa is preferably Ala orTyr, and Zaa is preferably Ala, but then cleaves at a variable distancefrom the C-terminus. A typical cleavage is -Ala-Ala-|-Arg-Ala-Ala-Lys-Glu-Asn-Tyr-Ala-L	Control
115252745	Peptoclostridium difficile 630	3.4.21.102	C-terminal processing peptidase.	The enzyme shows specific recognition of a C-terminal tripeptide, Xaa-Yaa-Zaa, in which Xaa is preferably Ala or Leu, Yaa is preferably Ala orTyr, and Zaa is preferably Ala, but then cleaves at a variable distancefrom the C-terminus. A typical cleavage is -Ala-Ala-|-Arg-Ala-Ala-Lys-Glu-Asn-Tyr-Ala-L	Autism
291516108	Alistipes shahii WAL 8301	6.1.1.21	Histidine--tRNA ligase.	ATP + L-histidine + tRNA(His) = AMP + diphosphate + L-histidyl-tRNA(His).	Control
187426706	Akkermansia muciniphila ATCC BAA-835	6.1.1.21	Histidine--tRNA ligase.	ATP + L-histidine + tRNA(His) = AMP + diphosphate + L-histidyl-tRNA(His).	Autism
291516108	Alistipes shahii WAL 8301	6.1.1.21	Histidine--tRNA ligase.	ATP + L-histidine + tRNA(His) = AMP + diphosphate + L-histidyl-tRNA(His).	Control
110676061	Clostridium perfringens ATCC 13124	6.1.1.21	Histidine--tRNA ligase.	ATP + L-histidine + tRNA(His) = AMP + diphosphate + L-histidyl-tRNA(His).	Autism
291516108	Alistipes shahii WAL 8301	6.1.1.21	Histidine--tRNA ligase.	ATP + L-histidine + tRNA(His) = AMP + diphosphate + L-histidyl-tRNA(His).	Control
219869941	Desulfovibrio desulfuricans ATCC 27774	6.1.1.21	Histidine--tRNA ligase.	ATP + L-histidine + tRNA(His) = AMP + diphosphate + L-histidyl-tRNA(His).	Autism
291516108	Alistipes shahii WAL 8301	6.1.1.21	Histidine--tRNA ligase.	ATP + L-histidine + tRNA(His) = AMP + diphosphate + L-histidyl-tRNA(His).	Control
115252745	Peptoclostridium difficile 630	6.1.1.21	Histidine--tRNA ligase.	ATP + L-histidine + tRNA(His) = AMP + diphosphate + L-histidyl-tRNA(His).	Autism
291516108	Alistipes shahii WAL 8301	6.1.1.21	Histidine--tRNA ligase.	ATP + L-histidine + tRNA(His) = AMP + diphosphate + L-histidyl-tRNA(His).	Control
115252745	Peptoclostridium difficile 630	6.1.1.21	Histidine--tRNA ligase.	ATP + L-histidine + tRNA(His) = AMP + diphosphate + L-histidyl-tRNA(His).	Autism
291516108	Alistipes shahii WAL 8301	1.1.1.193	5-amino-6-(5-phosphoribosylamino)uracil reductase.	5-amino-6-(5-phospho-D-ribitylamino)uracil + NADP(+) = 5-amino-6-(5-phospho-D-ribosylamino)uracil + NADPH.	Control
110676061	Clostridium perfringens ATCC 13124	1.1.1.193	5-amino-6-(5-phosphoribosylamino)uracil reductase.	5-amino-6-(5-phospho-D-ribitylamino)uracil + NADP(+) = 5-amino-6-(5-phospho-D-ribosylamino)uracil + NADPH.	Autism
291516108	Alistipes shahii WAL 8301	1.1.1.193	5-amino-6-(5-phosphoribosylamino)uracil reductase.	5-amino-6-(5-phospho-D-ribitylamino)uracil + NADP(+) = 5-amino-6-(5-phospho-D-ribosylamino)uracil + NADPH.	Control
115252745	Peptoclostridium difficile 630	1.1.1.193	5-amino-6-(5-phosphoribosylamino)uracil reductase.	5-amino-6-(5-phospho-D-ribitylamino)uracil + NADP(+) = 5-amino-6-(5-phospho-D-ribosylamino)uracil + NADPH.	Autism
291516108	Alistipes shahii WAL 8301	6.1.1.20	Phenylalanine--tRNA ligase.	ATP + L-phenylalanine + tRNA(Phe) = AMP + diphosphate + L-phenylalanyl-tRNA(Phe).	Control
187426706	Akkermansia muciniphila ATCC BAA-835	6.1.1.20	Phenylalanine--tRNA ligase.	ATP + L-phenylalanine + tRNA(Phe) = AMP + diphosphate + L-phenylalanyl-tRNA(Phe).	Autism
291516108	Alistipes shahii WAL 8301	6.1.1.20	Phenylalanine--tRNA ligase.	ATP + L-phenylalanine + tRNA(Phe) = AMP + diphosphate + L-phenylalanyl-tRNA(Phe).	Control
110676061	Clostridium perfringens ATCC 13124	6.1.1.20	Phenylalanine--tRNA ligase.	ATP + L-phenylalanine + tRNA(Phe) = AMP + diphosphate + L-phenylalanyl-tRNA(Phe).	Autism
291516108	Alistipes shahii WAL 8301	6.1.1.20	Phenylalanine--tRNA ligase.	ATP + L-phenylalanine + tRNA(Phe) = AMP + diphosphate + L-phenylalanyl-tRNA(Phe).	Control
110676061	Clostridium perfringens ATCC 13124	6.1.1.20	Phenylalanine--tRNA ligase.	ATP + L-phenylalanine + tRNA(Phe) = AMP + diphosphate + L-phenylalanyl-tRNA(Phe).	Autism
291516108	Alistipes shahii WAL 8301	6.1.1.20	Phenylalanine--tRNA ligase.	ATP + L-phenylalanine + tRNA(Phe) = AMP + diphosphate + L-phenylalanyl-tRNA(Phe).	Control
219869941	Desulfovibrio desulfuricans ATCC 27774	6.1.1.20	Phenylalanine--tRNA ligase.	ATP + L-phenylalanine + tRNA(Phe) = AMP + diphosphate + L-phenylalanyl-tRNA(Phe).	Autism
291516108	Alistipes shahii WAL 8301	6.1.1.20	Phenylalanine--tRNA ligase.	ATP + L-phenylalanine + tRNA(Phe) = AMP + diphosphate + L-phenylalanyl-tRNA(Phe).	Control
115252745	Peptoclostridium difficile 630	6.1.1.20	Phenylalanine--tRNA ligase.	ATP + L-phenylalanine + tRNA(Phe) = AMP + diphosphate + L-phenylalanyl-tRNA(Phe).	Autism
291516108	Alistipes shahii WAL 8301	6.1.1.20	Phenylalanine--tRNA ligase.	ATP + L-phenylalanine + tRNA(Phe) = AMP + diphosphate + L-phenylalanyl-tRNA(Phe).	Control
115252745	Peptoclostridium difficile 630	6.1.1.20	Phenylalanine--tRNA ligase.	ATP + L-phenylalanine + tRNA(Phe) = AMP + diphosphate + L-phenylalanyl-tRNA(Phe).	Autism
291516108	Alistipes shahii WAL 8301	4.2.1.20	Tryptophan synthase.	L-serine + 1-C-(indol-3-yl)glycerol 3-phosphate = L-tryptophan +D-glyceraldehyde 3-phosphate + H(2)O.	Control
187426706	Akkermansia muciniphila ATCC BAA-835	4.2.1.20	Tryptophan synthase.	L-serine + 1-C-(indol-3-yl)glycerol 3-phosphate = L-tryptophan +D-glyceraldehyde 3-phosphate + H(2)O.	Autism
291516108	Alistipes shahii WAL 8301	4.2.1.20	Tryptophan synthase.	L-serine + 1-C-(indol-3-yl)glycerol 3-phosphate = L-tryptophan +D-glyceraldehyde 3-phosphate + H(2)O.	Control
219869941	Desulfovibrio desulfuricans ATCC 27774	4.2.1.20	Tryptophan synthase.	L-serine + 1-C-(indol-3-yl)glycerol 3-phosphate = L-tryptophan +D-glyceraldehyde 3-phosphate + H(2)O.	Autism
291516108	Alistipes shahii WAL 8301	4.2.1.20	Tryptophan synthase.	L-serine + 1-C-(indol-3-yl)glycerol 3-phosphate = L-tryptophan +D-glyceraldehyde 3-phosphate + H(2)O.	Control
219869941	Desulfovibrio desulfuricans ATCC 27774	4.2.1.20	Tryptophan synthase.	L-serine + 1-C-(indol-3-yl)glycerol 3-phosphate = L-tryptophan +D-glyceraldehyde 3-phosphate + H(2)O.	Autism
291516108	Alistipes shahii WAL 8301	4.1.1.20	Diaminopimelate decarboxylase.	Meso-2,6-diaminoheptanedioate = L-lysine + CO(2).	Control
110676061	Clostridium perfringens ATCC 13124	4.1.1.20	Diaminopimelate decarboxylase.	Meso-2,6-diaminoheptanedioate = L-lysine + CO(2).	Autism
291516108	Alistipes shahii WAL 8301	4.1.1.20	Diaminopimelate decarboxylase.	Meso-2,6-diaminoheptanedioate = L-lysine + CO(2).	Control
115252745	Peptoclostridium difficile 630	4.1.1.20	Diaminopimelate decarboxylase.	Meso-2,6-diaminoheptanedioate = L-lysine + CO(2).	Autism
291516108	Alistipes shahii WAL 8301	4.1.1.20	Diaminopimelate decarboxylase.	Meso-2,6-diaminoheptanedioate = L-lysine + CO(2).	Control
115252745	Peptoclostridium difficile 630	4.1.1.20	Diaminopimelate decarboxylase.	Meso-2,6-diaminoheptanedioate = L-lysine + CO(2).	Autism
291516108	Alistipes shahii WAL 8301	1.17.4.2	Ribonucleoside-triphosphate reductase.	2'-deoxyribonucleoside triphosphate + thioredoxin disulfide + H(2)O =ribonucleoside triphosphate + thioredoxin.	Control
110676061	Clostridium perfringens ATCC 13124	1.17.4.2	Ribonucleoside-triphosphate reductase.	2'-deoxyribonucleoside triphosphate + thioredoxin disulfide + H(2)O =ribonucleoside triphosphate + thioredoxin.	Autism
291516108	Alistipes shahii WAL 8301	1.17.4.2	Ribonucleoside-triphosphate reductase.	2'-deoxyribonucleoside triphosphate + thioredoxin disulfide + H(2)O =ribonucleoside triphosphate + thioredoxin.	Control
110676061	Clostridium perfringens ATCC 13124	1.17.4.2	Ribonucleoside-triphosphate reductase.	2'-deoxyribonucleoside triphosphate + thioredoxin disulfide + H(2)O =ribonucleoside triphosphate + thioredoxin.	Autism
291516108	Alistipes shahii WAL 8301	1.17.4.2	Ribonucleoside-triphosphate reductase.	2'-deoxyribonucleoside triphosphate + thioredoxin disulfide + H(2)O =ribonucleoside triphosphate + thioredoxin.	Control
110676061	Clostridium perfringens ATCC 13124	1.17.4.2	Ribonucleoside-triphosphate reductase.	2'-deoxyribonucleoside triphosphate + thioredoxin disulfide + H(2)O =ribonucleoside triphosphate + thioredoxin.	Autism
291516108	Alistipes shahii WAL 8301	1.17.4.2	Ribonucleoside-triphosphate reductase.	2'-deoxyribonucleoside triphosphate + thioredoxin disulfide + H(2)O =ribonucleoside triphosphate + thioredoxin.	Control
115252745	Peptoclostridium difficile 630	1.17.4.2	Ribonucleoside-triphosphate reductase.	2'-deoxyribonucleoside triphosphate + thioredoxin disulfide + H(2)O =ribonucleoside triphosphate + thioredoxin.	Autism
291516108	Alistipes shahii WAL 8301	1.97.1.4	[Formate-C-acetyltransferase]-activating enzyme.	S-adenosyl-L-methionine + dihydroflavodoxin + [formateC-acetyltransferase]-glycine = 5'-deoxyadenosine + L-methionine +flavodoxin semiquinone + [formate C-acetyltransferase]-glycin-2-ylradical.	Control
187426706	Akkermansia muciniphila ATCC BAA-835	1.97.1.4	[Formate-C-acetyltransferase]-activating enzyme.	S-adenosyl-L-methionine + dihydroflavodoxin + [formateC-acetyltransferase]-glycine = 5'-deoxyadenosine + L-methionine +flavodoxin semiquinone + [formate C-acetyltransferase]-glycin-2-ylradical.	Autism
291516108	Alistipes shahii WAL 8301	1.97.1.4	[Formate-C-acetyltransferase]-activating enzyme.	S-adenosyl-L-methionine + dihydroflavodoxin + [formateC-acetyltransferase]-glycine = 5'-deoxyadenosine + L-methionine +flavodoxin semiquinone + [formate C-acetyltransferase]-glycin-2-ylradical.	Control
110676061	Clostridium perfringens ATCC 13124	1.97.1.4	[Formate-C-acetyltransferase]-activating enzyme.	S-adenosyl-L-methionine + dihydroflavodoxin + [formateC-acetyltransferase]-glycine = 5'-deoxyadenosine + L-methionine +flavodoxin semiquinone + [formate C-acetyltransferase]-glycin-2-ylradical.	Autism
291516108	Alistipes shahii WAL 8301	1.97.1.4	[Formate-C-acetyltransferase]-activating enzyme.	S-adenosyl-L-methionine + dihydroflavodoxin + [formateC-acetyltransferase]-glycine = 5'-deoxyadenosine + L-methionine +flavodoxin semiquinone + [formate C-acetyltransferase]-glycin-2-ylradical.	Control
219869941	Desulfovibrio desulfuricans ATCC 27774	1.97.1.4	[Formate-C-acetyltransferase]-activating enzyme.	S-adenosyl-L-methionine + dihydroflavodoxin + [formateC-acetyltransferase]-glycine = 5'-deoxyadenosine + L-methionine +flavodoxin semiquinone + [formate C-acetyltransferase]-glycin-2-ylradical.	Autism
291516108	Alistipes shahii WAL 8301	1.97.1.4	[Formate-C-acetyltransferase]-activating enzyme.	S-adenosyl-L-methionine + dihydroflavodoxin + [formateC-acetyltransferase]-glycine = 5'-deoxyadenosine + L-methionine +flavodoxin semiquinone + [formate C-acetyltransferase]-glycin-2-ylradical.	Control
219869941	Desulfovibrio desulfuricans ATCC 27774	1.97.1.4	[Formate-C-acetyltransferase]-activating enzyme.	S-adenosyl-L-methionine + dihydroflavodoxin + [formateC-acetyltransferase]-glycine = 5'-deoxyadenosine + L-methionine +flavodoxin semiquinone + [formate C-acetyltransferase]-glycin-2-ylradical.	Autism
291516108	Alistipes shahii WAL 8301	1.97.1.4	[Formate-C-acetyltransferase]-activating enzyme.	S-adenosyl-L-methionine + dihydroflavodoxin + [formateC-acetyltransferase]-glycine = 5'-deoxyadenosine + L-methionine +flavodoxin semiquinone + [formate C-acetyltransferase]-glycin-2-ylradical.	Control
115252745	Peptoclostridium difficile 630	1.97.1.4	[Formate-C-acetyltransferase]-activating enzyme.	S-adenosyl-L-methionine + dihydroflavodoxin + [formateC-acetyltransferase]-glycine = 5'-deoxyadenosine + L-methionine +flavodoxin semiquinone + [formate C-acetyltransferase]-glycin-2-ylradical.	Autism
291516108	Alistipes shahii WAL 8301	1.97.1.4	[Formate-C-acetyltransferase]-activating enzyme.	S-adenosyl-L-methionine + dihydroflavodoxin + [formateC-acetyltransferase]-glycine = 5'-deoxyadenosine + L-methionine +flavodoxin semiquinone + [formate C-acetyltransferase]-glycin-2-ylradical.	Control
115252745	Peptoclostridium difficile 630	1.97.1.4	[Formate-C-acetyltransferase]-activating enzyme.	S-adenosyl-L-methionine + dihydroflavodoxin + [formateC-acetyltransferase]-glycine = 5'-deoxyadenosine + L-methionine +flavodoxin semiquinone + [formate C-acetyltransferase]-glycin-2-ylradical.	Autism
291516108	Alistipes shahii WAL 8301	1.97.1.4	[Formate-C-acetyltransferase]-activating enzyme.	S-adenosyl-L-methionine + dihydroflavodoxin + [formateC-acetyltransferase]-glycine = 5'-deoxyadenosine + L-methionine +flavodoxin semiquinone + [formate C-acetyltransferase]-glycin-2-ylradical.	Control
115252745	Peptoclostridium difficile 630	1.97.1.4	[Formate-C-acetyltransferase]-activating enzyme.	S-adenosyl-L-methionine + dihydroflavodoxin + [formateC-acetyltransferase]-glycine = 5'-deoxyadenosine + L-methionine +flavodoxin semiquinone + [formate C-acetyltransferase]-glycin-2-ylradical.	Autism
291516108	Alistipes shahii WAL 8301	1.97.1.4	[Formate-C-acetyltransferase]-activating enzyme.	S-adenosyl-L-methionine + dihydroflavodoxin + [formateC-acetyltransferase]-glycine = 5'-deoxyadenosine + L-methionine +flavodoxin semiquinone + [formate C-acetyltransferase]-glycin-2-ylradical.	Control
115252745	Peptoclostridium difficile 630	1.97.1.4	[Formate-C-acetyltransferase]-activating enzyme.	S-adenosyl-L-methionine + dihydroflavodoxin + [formateC-acetyltransferase]-glycine = 5'-deoxyadenosine + L-methionine +flavodoxin semiquinone + [formate C-acetyltransferase]-glycin-2-ylradical.	Autism
291516108	Alistipes shahii WAL 8301	2.5.1.17	Cob(I)yrinic acid a,c-diamide adenosyltransferase.	(1) ATP + cob(I)yrinic acid a,c-diamide = triphosphate +adenosylcob(III)yrinic acid a,c-diamide.(2) ATP + cobinamide = triphosphate + adenosylcobinamide.	Control
110676061	Clostridium perfringens ATCC 13124	2.5.1.17	Cob(I)yrinic acid a,c-diamide adenosyltransferase.	(1) ATP + cob(I)yrinic acid a,c-diamide = triphosphate +adenosylcob(III)yrinic acid a,c-diamide.(2) ATP + cobinamide = triphosphate + adenosylcobinamide.	Autism
291516108	Alistipes shahii WAL 8301	2.5.1.17	Cob(I)yrinic acid a,c-diamide adenosyltransferase.	(1) ATP + cob(I)yrinic acid a,c-diamide = triphosphate +adenosylcob(III)yrinic acid a,c-diamide.(2) ATP + cobinamide = triphosphate + adenosylcobinamide.	Control
115252745	Peptoclostridium difficile 630	2.5.1.17	Cob(I)yrinic acid a,c-diamide adenosyltransferase.	(1) ATP + cob(I)yrinic acid a,c-diamide = triphosphate +adenosylcob(III)yrinic acid a,c-diamide.(2) ATP + cobinamide = triphosphate + adenosylcobinamide.	Autism
291516108	Alistipes shahii WAL 8301	2.5.1.75	tRNA dimethylallyltransferase.	Dimethylallyl diphosphate + adenine(37) in tRNA = diphosphate + N(6)-dimethylallyladenine(37) in tRNA.	Control
187426706	Akkermansia muciniphila ATCC BAA-835	2.5.1.75	tRNA dimethylallyltransferase.	Dimethylallyl diphosphate + adenine(37) in tRNA = diphosphate + N(6)-dimethylallyladenine(37) in tRNA.	Autism
291516108	Alistipes shahii WAL 8301	2.5.1.75	tRNA dimethylallyltransferase.	Dimethylallyl diphosphate + adenine(37) in tRNA = diphosphate + N(6)-dimethylallyladenine(37) in tRNA.	Control
110676061	Clostridium perfringens ATCC 13124	2.5.1.75	tRNA dimethylallyltransferase.	Dimethylallyl diphosphate + adenine(37) in tRNA = diphosphate + N(6)-dimethylallyladenine(37) in tRNA.	Autism
291516108	Alistipes shahii WAL 8301	2.5.1.75	tRNA dimethylallyltransferase.	Dimethylallyl diphosphate + adenine(37) in tRNA = diphosphate + N(6)-dimethylallyladenine(37) in tRNA.	Control
219869941	Desulfovibrio desulfuricans ATCC 27774	2.5.1.75	tRNA dimethylallyltransferase.	Dimethylallyl diphosphate + adenine(37) in tRNA = diphosphate + N(6)-dimethylallyladenine(37) in tRNA.	Autism
291516108	Alistipes shahii WAL 8301	2.5.1.75	tRNA dimethylallyltransferase.	Dimethylallyl diphosphate + adenine(37) in tRNA = diphosphate + N(6)-dimethylallyladenine(37) in tRNA.	Control
115252745	Peptoclostridium difficile 630	2.5.1.75	tRNA dimethylallyltransferase.	Dimethylallyl diphosphate + adenine(37) in tRNA = diphosphate + N(6)-dimethylallyladenine(37) in tRNA.	Autism
291516108	Alistipes shahii WAL 8301	3.6.3.12	Potassium-transporting ATPase.	ATP + H(2)O + K(+)(Out) = ADP + phosphate + K(+)(In).	Control
187426706	Akkermansia muciniphila ATCC BAA-835	3.6.3.12	Potassium-transporting ATPase.	ATP + H(2)O + K(+)(Out) = ADP + phosphate + K(+)(In).	Autism
291516108	Alistipes shahii WAL 8301	3.6.3.12	Potassium-transporting ATPase.	ATP + H(2)O + K(+)(Out) = ADP + phosphate + K(+)(In).	Control
187426706	Akkermansia muciniphila ATCC BAA-835	3.6.3.12	Potassium-transporting ATPase.	ATP + H(2)O + K(+)(Out) = ADP + phosphate + K(+)(In).	Autism
291516108	Alistipes shahii WAL 8301	3.6.3.12	Potassium-transporting ATPase.	ATP + H(2)O + K(+)(Out) = ADP + phosphate + K(+)(In).	Control
187426706	Akkermansia muciniphila ATCC BAA-835	3.6.3.12	Potassium-transporting ATPase.	ATP + H(2)O + K(+)(Out) = ADP + phosphate + K(+)(In).	Autism
291516108	Alistipes shahii WAL 8301	3.6.3.12	Potassium-transporting ATPase.	ATP + H(2)O + K(+)(Out) = ADP + phosphate + K(+)(In).	Control
187426706	Akkermansia muciniphila ATCC BAA-835	3.6.3.12	Potassium-transporting ATPase.	ATP + H(2)O + K(+)(Out) = ADP + phosphate + K(+)(In).	Autism
291516108	Alistipes shahii WAL 8301	3.6.3.12	Potassium-transporting ATPase.	ATP + H(2)O + K(+)(Out) = ADP + phosphate + K(+)(In).	Control
110676061	Clostridium perfringens ATCC 13124	3.6.3.12	Potassium-transporting ATPase.	ATP + H(2)O + K(+)(Out) = ADP + phosphate + K(+)(In).	Autism
291516108	Alistipes shahii WAL 8301	3.6.3.12	Potassium-transporting ATPase.	ATP + H(2)O + K(+)(Out) = ADP + phosphate + K(+)(In).	Control
110676061	Clostridium perfringens ATCC 13124	3.6.3.12	Potassium-transporting ATPase.	ATP + H(2)O + K(+)(Out) = ADP + phosphate + K(+)(In).	Autism
291516108	Alistipes shahii WAL 8301	3.6.3.12	Potassium-transporting ATPase.	ATP + H(2)O + K(+)(Out) = ADP + phosphate + K(+)(In).	Control
110676061	Clostridium perfringens ATCC 13124	3.6.3.12	Potassium-transporting ATPase.	ATP + H(2)O + K(+)(Out) = ADP + phosphate + K(+)(In).	Autism
291516108	Alistipes shahii WAL 8301	3.6.3.12	Potassium-transporting ATPase.	ATP + H(2)O + K(+)(Out) = ADP + phosphate + K(+)(In).	Control
219869941	Desulfovibrio desulfuricans ATCC 27774	3.6.3.12	Potassium-transporting ATPase.	ATP + H(2)O + K(+)(Out) = ADP + phosphate + K(+)(In).	Autism
291516108	Alistipes shahii WAL 8301	3.6.3.12	Potassium-transporting ATPase.	ATP + H(2)O + K(+)(Out) = ADP + phosphate + K(+)(In).	Control
219869941	Desulfovibrio desulfuricans ATCC 27774	3.6.3.12	Potassium-transporting ATPase.	ATP + H(2)O + K(+)(Out) = ADP + phosphate + K(+)(In).	Autism
291516108	Alistipes shahii WAL 8301	3.6.3.12	Potassium-transporting ATPase.	ATP + H(2)O + K(+)(Out) = ADP + phosphate + K(+)(In).	Control
115252745	Peptoclostridium difficile 630	3.6.3.12	Potassium-transporting ATPase.	ATP + H(2)O + K(+)(Out) = ADP + phosphate + K(+)(In).	Autism
291516108	Alistipes shahii WAL 8301	3.6.3.12	Potassium-transporting ATPase.	ATP + H(2)O + K(+)(Out) = ADP + phosphate + K(+)(In).	Control
115252745	Peptoclostridium difficile 630	3.6.3.12	Potassium-transporting ATPase.	ATP + H(2)O + K(+)(Out) = ADP + phosphate + K(+)(In).	Autism
291516108	Alistipes shahii WAL 8301	3.6.3.12	Potassium-transporting ATPase.	ATP + H(2)O + K(+)(Out) = ADP + phosphate + K(+)(In).	Control
115252745	Peptoclostridium difficile 630	3.6.3.12	Potassium-transporting ATPase.	ATP + H(2)O + K(+)(Out) = ADP + phosphate + K(+)(In).	Autism
291516108	Alistipes shahii WAL 8301	3.6.3.12	Potassium-transporting ATPase.	ATP + H(2)O + K(+)(Out) = ADP + phosphate + K(+)(In).	Control
187426706	Akkermansia muciniphila ATCC BAA-835	3.6.3.12	Potassium-transporting ATPase.	ATP + H(2)O + K(+)(Out) = ADP + phosphate + K(+)(In).	Autism
291516108	Alistipes shahii WAL 8301	3.6.3.12	Potassium-transporting ATPase.	ATP + H(2)O + K(+)(Out) = ADP + phosphate + K(+)(In).	Control
187426706	Akkermansia muciniphila ATCC BAA-835	3.6.3.12	Potassium-transporting ATPase.	ATP + H(2)O + K(+)(Out) = ADP + phosphate + K(+)(In).	Autism
291516108	Alistipes shahii WAL 8301	3.6.3.12	Potassium-transporting ATPase.	ATP + H(2)O + K(+)(Out) = ADP + phosphate + K(+)(In).	Control
187426706	Akkermansia muciniphila ATCC BAA-835	3.6.3.12	Potassium-transporting ATPase.	ATP + H(2)O + K(+)(Out) = ADP + phosphate + K(+)(In).	Autism
291516108	Alistipes shahii WAL 8301	3.6.3.12	Potassium-transporting ATPase.	ATP + H(2)O + K(+)(Out) = ADP + phosphate + K(+)(In).	Control
187426706	Akkermansia muciniphila ATCC BAA-835	3.6.3.12	Potassium-transporting ATPase.	ATP + H(2)O + K(+)(Out) = ADP + phosphate + K(+)(In).	Autism
291516108	Alistipes shahii WAL 8301	3.6.3.12	Potassium-transporting ATPase.	ATP + H(2)O + K(+)(Out) = ADP + phosphate + K(+)(In).	Control
110676061	Clostridium perfringens ATCC 13124	3.6.3.12	Potassium-transporting ATPase.	ATP + H(2)O + K(+)(Out) = ADP + phosphate + K(+)(In).	Autism
291516108	Alistipes shahii WAL 8301	3.6.3.12	Potassium-transporting ATPase.	ATP + H(2)O + K(+)(Out) = ADP + phosphate + K(+)(In).	Control
110676061	Clostridium perfringens ATCC 13124	3.6.3.12	Potassium-transporting ATPase.	ATP + H(2)O + K(+)(Out) = ADP + phosphate + K(+)(In).	Autism
291516108	Alistipes shahii WAL 8301	3.6.3.12	Potassium-transporting ATPase.	ATP + H(2)O + K(+)(Out) = ADP + phosphate + K(+)(In).	Control
110676061	Clostridium perfringens ATCC 13124	3.6.3.12	Potassium-transporting ATPase.	ATP + H(2)O + K(+)(Out) = ADP + phosphate + K(+)(In).	Autism
291516108	Alistipes shahii WAL 8301	3.6.3.12	Potassium-transporting ATPase.	ATP + H(2)O + K(+)(Out) = ADP + phosphate + K(+)(In).	Control
219869941	Desulfovibrio desulfuricans ATCC 27774	3.6.3.12	Potassium-transporting ATPase.	ATP + H(2)O + K(+)(Out) = ADP + phosphate + K(+)(In).	Autism
291516108	Alistipes shahii WAL 8301	3.6.3.12	Potassium-transporting ATPase.	ATP + H(2)O + K(+)(Out) = ADP + phosphate + K(+)(In).	Control
219869941	Desulfovibrio desulfuricans ATCC 27774	3.6.3.12	Potassium-transporting ATPase.	ATP + H(2)O + K(+)(Out) = ADP + phosphate + K(+)(In).	Autism
291516108	Alistipes shahii WAL 8301	3.6.3.12	Potassium-transporting ATPase.	ATP + H(2)O + K(+)(Out) = ADP + phosphate + K(+)(In).	Control
115252745	Peptoclostridium difficile 630	3.6.3.12	Potassium-transporting ATPase.	ATP + H(2)O + K(+)(Out) = ADP + phosphate + K(+)(In).	Autism
291516108	Alistipes shahii WAL 8301	3.6.3.12	Potassium-transporting ATPase.	ATP + H(2)O + K(+)(Out) = ADP + phosphate + K(+)(In).	Control
115252745	Peptoclostridium difficile 630	3.6.3.12	Potassium-transporting ATPase.	ATP + H(2)O + K(+)(Out) = ADP + phosphate + K(+)(In).	Autism
291516108	Alistipes shahii WAL 8301	3.6.3.12	Potassium-transporting ATPase.	ATP + H(2)O + K(+)(Out) = ADP + phosphate + K(+)(In).	Control
115252745	Peptoclostridium difficile 630	3.6.3.12	Potassium-transporting ATPase.	ATP + H(2)O + K(+)(Out) = ADP + phosphate + K(+)(In).	Autism
291516108	Alistipes shahii WAL 8301	3.6.3.12	Potassium-transporting ATPase.	ATP + H(2)O + K(+)(Out) = ADP + phosphate + K(+)(In).	Control
187426706	Akkermansia muciniphila ATCC BAA-835	3.6.3.12	Potassium-transporting ATPase.	ATP + H(2)O + K(+)(Out) = ADP + phosphate + K(+)(In).	Autism
291516108	Alistipes shahii WAL 8301	3.6.3.12	Potassium-transporting ATPase.	ATP + H(2)O + K(+)(Out) = ADP + phosphate + K(+)(In).	Control
187426706	Akkermansia muciniphila ATCC BAA-835	3.6.3.12	Potassium-transporting ATPase.	ATP + H(2)O + K(+)(Out) = ADP + phosphate + K(+)(In).	Autism
291516108	Alistipes shahii WAL 8301	3.6.3.12	Potassium-transporting ATPase.	ATP + H(2)O + K(+)(Out) = ADP + phosphate + K(+)(In).	Control
187426706	Akkermansia muciniphila ATCC BAA-835	3.6.3.12	Potassium-transporting ATPase.	ATP + H(2)O + K(+)(Out) = ADP + phosphate + K(+)(In).	Autism
291516108	Alistipes shahii WAL 8301	3.6.3.12	Potassium-transporting ATPase.	ATP + H(2)O + K(+)(Out) = ADP + phosphate + K(+)(In).	Control
187426706	Akkermansia muciniphila ATCC BAA-835	3.6.3.12	Potassium-transporting ATPase.	ATP + H(2)O + K(+)(Out) = ADP + phosphate + K(+)(In).	Autism
291516108	Alistipes shahii WAL 8301	3.6.3.12	Potassium-transporting ATPase.	ATP + H(2)O + K(+)(Out) = ADP + phosphate + K(+)(In).	Control
110676061	Clostridium perfringens ATCC 13124	3.6.3.12	Potassium-transporting ATPase.	ATP + H(2)O + K(+)(Out) = ADP + phosphate + K(+)(In).	Autism
291516108	Alistipes shahii WAL 8301	3.6.3.12	Potassium-transporting ATPase.	ATP + H(2)O + K(+)(Out) = ADP + phosphate + K(+)(In).	Control
110676061	Clostridium perfringens ATCC 13124	3.6.3.12	Potassium-transporting ATPase.	ATP + H(2)O + K(+)(Out) = ADP + phosphate + K(+)(In).	Autism
291516108	Alistipes shahii WAL 8301	3.6.3.12	Potassium-transporting ATPase.	ATP + H(2)O + K(+)(Out) = ADP + phosphate + K(+)(In).	Control
110676061	Clostridium perfringens ATCC 13124	3.6.3.12	Potassium-transporting ATPase.	ATP + H(2)O + K(+)(Out) = ADP + phosphate + K(+)(In).	Autism
291516108	Alistipes shahii WAL 8301	3.6.3.12	Potassium-transporting ATPase.	ATP + H(2)O + K(+)(Out) = ADP + phosphate + K(+)(In).	Control
219869941	Desulfovibrio desulfuricans ATCC 27774	3.6.3.12	Potassium-transporting ATPase.	ATP + H(2)O + K(+)(Out) = ADP + phosphate + K(+)(In).	Autism
291516108	Alistipes shahii WAL 8301	3.6.3.12	Potassium-transporting ATPase.	ATP + H(2)O + K(+)(Out) = ADP + phosphate + K(+)(In).	Control
219869941	Desulfovibrio desulfuricans ATCC 27774	3.6.3.12	Potassium-transporting ATPase.	ATP + H(2)O + K(+)(Out) = ADP + phosphate + K(+)(In).	Autism
291516108	Alistipes shahii WAL 8301	3.6.3.12	Potassium-transporting ATPase.	ATP + H(2)O + K(+)(Out) = ADP + phosphate + K(+)(In).	Control
115252745	Peptoclostridium difficile 630	3.6.3.12	Potassium-transporting ATPase.	ATP + H(2)O + K(+)(Out) = ADP + phosphate + K(+)(In).	Autism
291516108	Alistipes shahii WAL 8301	3.6.3.12	Potassium-transporting ATPase.	ATP + H(2)O + K(+)(Out) = ADP + phosphate + K(+)(In).	Control
115252745	Peptoclostridium difficile 630	3.6.3.12	Potassium-transporting ATPase.	ATP + H(2)O + K(+)(Out) = ADP + phosphate + K(+)(In).	Autism
291516108	Alistipes shahii WAL 8301	3.6.3.12	Potassium-transporting ATPase.	ATP + H(2)O + K(+)(Out) = ADP + phosphate + K(+)(In).	Control
115252745	Peptoclostridium difficile 630	3.6.3.12	Potassium-transporting ATPase.	ATP + H(2)O + K(+)(Out) = ADP + phosphate + K(+)(In).	Autism
291516108	Alistipes shahii WAL 8301	2.7.13.3	Histidine kinase.	ATP + protein L-histidine = ADP + protein N-phospho-L-histidine.	Control
219869941	Desulfovibrio desulfuricans ATCC 27774	2.7.13.3	Histidine kinase.	ATP + protein L-histidine = ADP + protein N-phospho-L-histidine.	Autism
291516108	Alistipes shahii WAL 8301	2.7.13.3	Histidine kinase.	ATP + protein L-histidine = ADP + protein N-phospho-L-histidine.	Control
219869941	Desulfovibrio desulfuricans ATCC 27774	2.7.13.3	Histidine kinase.	ATP + protein L-histidine = ADP + protein N-phospho-L-histidine.	Autism
291516108	Alistipes shahii WAL 8301	2.7.13.3	Histidine kinase.	ATP + protein L-histidine = ADP + protein N-phospho-L-histidine.	Control
219869941	Desulfovibrio desulfuricans ATCC 27774	2.7.13.3	Histidine kinase.	ATP + protein L-histidine = ADP + protein N-phospho-L-histidine.	Autism
291516108	Alistipes shahii WAL 8301	2.7.13.3	Histidine kinase.	ATP + protein L-histidine = ADP + protein N-phospho-L-histidine.	Control
115252745	Peptoclostridium difficile 630	2.7.13.3	Histidine kinase.	ATP + protein L-histidine = ADP + protein N-phospho-L-histidine.	Autism
291516108	Alistipes shahii WAL 8301	2.7.13.3	Histidine kinase.	ATP + protein L-histidine = ADP + protein N-phospho-L-histidine.	Control
115252745	Peptoclostridium difficile 630	2.7.13.3	Histidine kinase.	ATP + protein L-histidine = ADP + protein N-phospho-L-histidine.	Autism
291516108	Alistipes shahii WAL 8301	2.7.13.3	Histidine kinase.	ATP + protein L-histidine = ADP + protein N-phospho-L-histidine.	Control
115252745	Peptoclostridium difficile 630	2.7.13.3	Histidine kinase.	ATP + protein L-histidine = ADP + protein N-phospho-L-histidine.	Autism
291516108	Alistipes shahii WAL 8301	2.7.13.3	Histidine kinase.	ATP + protein L-histidine = ADP + protein N-phospho-L-histidine.	Control
115252745	Peptoclostridium difficile 630	2.7.13.3	Histidine kinase.	ATP + protein L-histidine = ADP + protein N-phospho-L-histidine.	Autism
291516108	Alistipes shahii WAL 8301	2.7.13.3	Histidine kinase.	ATP + protein L-histidine = ADP + protein N-phospho-L-histidine.	Control
115252745	Peptoclostridium difficile 630	2.7.13.3	Histidine kinase.	ATP + protein L-histidine = ADP + protein N-phospho-L-histidine.	Autism
291516108	Alistipes shahii WAL 8301	2.7.13.3	Histidine kinase.	ATP + protein L-histidine = ADP + protein N-phospho-L-histidine.	Control
115252745	Peptoclostridium difficile 630	2.7.13.3	Histidine kinase.	ATP + protein L-histidine = ADP + protein N-phospho-L-histidine.	Autism
291516108	Alistipes shahii WAL 8301	2.7.13.3	Histidine kinase.	ATP + protein L-histidine = ADP + protein N-phospho-L-histidine.	Control
115252745	Peptoclostridium difficile 630	2.7.13.3	Histidine kinase.	ATP + protein L-histidine = ADP + protein N-phospho-L-histidine.	Autism
291516108	Alistipes shahii WAL 8301	2.7.13.3	Histidine kinase.	ATP + protein L-histidine = ADP + protein N-phospho-L-histidine.	Control
115252745	Peptoclostridium difficile 630	2.7.13.3	Histidine kinase.	ATP + protein L-histidine = ADP + protein N-phospho-L-histidine.	Autism
291516108	Alistipes shahii WAL 8301	2.7.13.3	Histidine kinase.	ATP + protein L-histidine = ADP + protein N-phospho-L-histidine.	Control
115252745	Peptoclostridium difficile 630	2.7.13.3	Histidine kinase.	ATP + protein L-histidine = ADP + protein N-phospho-L-histidine.	Autism
291516108	Alistipes shahii WAL 8301	2.7.13.3	Histidine kinase.	ATP + protein L-histidine = ADP + protein N-phospho-L-histidine.	Control
115252745	Peptoclostridium difficile 630	2.7.13.3	Histidine kinase.	ATP + protein L-histidine = ADP + protein N-phospho-L-histidine.	Autism
291516108	Alistipes shahii WAL 8301	2.7.13.3	Histidine kinase.	ATP + protein L-histidine = ADP + protein N-phospho-L-histidine.	Control
115252745	Peptoclostridium difficile 630	2.7.13.3	Histidine kinase.	ATP + protein L-histidine = ADP + protein N-phospho-L-histidine.	Autism
291516108	Alistipes shahii WAL 8301	2.7.13.3	Histidine kinase.	ATP + protein L-histidine = ADP + protein N-phospho-L-histidine.	Control
115252745	Peptoclostridium difficile 630	2.7.13.3	Histidine kinase.	ATP + protein L-histidine = ADP + protein N-phospho-L-histidine.	Autism
291516108	Alistipes shahii WAL 8301	2.7.13.3	Histidine kinase.	ATP + protein L-histidine = ADP + protein N-phospho-L-histidine.	Control
219869941	Desulfovibrio desulfuricans ATCC 27774	2.7.13.3	Histidine kinase.	ATP + protein L-histidine = ADP + protein N-phospho-L-histidine.	Autism
291516108	Alistipes shahii WAL 8301	2.7.13.3	Histidine kinase.	ATP + protein L-histidine = ADP + protein N-phospho-L-histidine.	Control
219869941	Desulfovibrio desulfuricans ATCC 27774	2.7.13.3	Histidine kinase.	ATP + protein L-histidine = ADP + protein N-phospho-L-histidine.	Autism
291516108	Alistipes shahii WAL 8301	2.7.13.3	Histidine kinase.	ATP + protein L-histidine = ADP + protein N-phospho-L-histidine.	Control
219869941	Desulfovibrio desulfuricans ATCC 27774	2.7.13.3	Histidine kinase.	ATP + protein L-histidine = ADP + protein N-phospho-L-histidine.	Autism
291516108	Alistipes shahii WAL 8301	2.7.13.3	Histidine kinase.	ATP + protein L-histidine = ADP + protein N-phospho-L-histidine.	Control
115252745	Peptoclostridium difficile 630	2.7.13.3	Histidine kinase.	ATP + protein L-histidine = ADP + protein N-phospho-L-histidine.	Autism
291516108	Alistipes shahii WAL 8301	2.7.13.3	Histidine kinase.	ATP + protein L-histidine = ADP + protein N-phospho-L-histidine.	Control
115252745	Peptoclostridium difficile 630	2.7.13.3	Histidine kinase.	ATP + protein L-histidine = ADP + protein N-phospho-L-histidine.	Autism
291516108	Alistipes shahii WAL 8301	2.7.13.3	Histidine kinase.	ATP + protein L-histidine = ADP + protein N-phospho-L-histidine.	Control
115252745	Peptoclostridium difficile 630	2.7.13.3	Histidine kinase.	ATP + protein L-histidine = ADP + protein N-phospho-L-histidine.	Autism
291516108	Alistipes shahii WAL 8301	2.7.13.3	Histidine kinase.	ATP + protein L-histidine = ADP + protein N-phospho-L-histidine.	Control
115252745	Peptoclostridium difficile 630	2.7.13.3	Histidine kinase.	ATP + protein L-histidine = ADP + protein N-phospho-L-histidine.	Autism
291516108	Alistipes shahii WAL 8301	2.7.13.3	Histidine kinase.	ATP + protein L-histidine = ADP + protein N-phospho-L-histidine.	Control
115252745	Peptoclostridium difficile 630	2.7.13.3	Histidine kinase.	ATP + protein L-histidine = ADP + protein N-phospho-L-histidine.	Autism
291516108	Alistipes shahii WAL 8301	2.7.13.3	Histidine kinase.	ATP + protein L-histidine = ADP + protein N-phospho-L-histidine.	Control
115252745	Peptoclostridium difficile 630	2.7.13.3	Histidine kinase.	ATP + protein L-histidine = ADP + protein N-phospho-L-histidine.	Autism
291516108	Alistipes shahii WAL 8301	2.7.13.3	Histidine kinase.	ATP + protein L-histidine = ADP + protein N-phospho-L-histidine.	Control
115252745	Peptoclostridium difficile 630	2.7.13.3	Histidine kinase.	ATP + protein L-histidine = ADP + protein N-phospho-L-histidine.	Autism
291516108	Alistipes shahii WAL 8301	2.7.13.3	Histidine kinase.	ATP + protein L-histidine = ADP + protein N-phospho-L-histidine.	Control
115252745	Peptoclostridium difficile 630	2.7.13.3	Histidine kinase.	ATP + protein L-histidine = ADP + protein N-phospho-L-histidine.	Autism
291516108	Alistipes shahii WAL 8301	2.7.13.3	Histidine kinase.	ATP + protein L-histidine = ADP + protein N-phospho-L-histidine.	Control
115252745	Peptoclostridium difficile 630	2.7.13.3	Histidine kinase.	ATP + protein L-histidine = ADP + protein N-phospho-L-histidine.	Autism
291516108	Alistipes shahii WAL 8301	2.7.13.3	Histidine kinase.	ATP + protein L-histidine = ADP + protein N-phospho-L-histidine.	Control
115252745	Peptoclostridium difficile 630	2.7.13.3	Histidine kinase.	ATP + protein L-histidine = ADP + protein N-phospho-L-histidine.	Autism
291516108	Alistipes shahii WAL 8301	2.7.13.3	Histidine kinase.	ATP + protein L-histidine = ADP + protein N-phospho-L-histidine.	Control
115252745	Peptoclostridium difficile 630	2.7.13.3	Histidine kinase.	ATP + protein L-histidine = ADP + protein N-phospho-L-histidine.	Autism
291516108	Alistipes shahii WAL 8301	2.7.13.3	Histidine kinase.	ATP + protein L-histidine = ADP + protein N-phospho-L-histidine.	Control
115252745	Peptoclostridium difficile 630	2.7.13.3	Histidine kinase.	ATP + protein L-histidine = ADP + protein N-phospho-L-histidine.	Autism
291516108	Alistipes shahii WAL 8301	1.1.1.274	2,5-didehydrogluconate reductase (2-dehydro-D-gluconate-forming).	2-dehydro-D-gluconate + NADP(+) = 2,5-didehydro-D-gluconate + NADPH.	Control
187426706	Akkermansia muciniphila ATCC BAA-835	1.1.1.274	2,5-didehydrogluconate reductase (2-dehydro-D-gluconate-forming).	2-dehydro-D-gluconate + NADP(+) = 2,5-didehydro-D-gluconate + NADPH.	Autism
291516108	Alistipes shahii WAL 8301	1.1.1.274	2,5-didehydrogluconate reductase (2-dehydro-D-gluconate-forming).	2-dehydro-D-gluconate + NADP(+) = 2,5-didehydro-D-gluconate + NADPH.	Control
115252745	Peptoclostridium difficile 630	1.1.1.274	2,5-didehydrogluconate reductase (2-dehydro-D-gluconate-forming).	2-dehydro-D-gluconate + NADP(+) = 2,5-didehydro-D-gluconate + NADPH.	Autism
291516108	Alistipes shahii WAL 8301	5.4.2.11	Phosphoglycerate mutase (2,3-diphosphoglycerate-dependent).	2-phospho-D-glycerate = 3-phospho-D-glycerate.	Control
187426706	Akkermansia muciniphila ATCC BAA-835	5.4.2.11	Phosphoglycerate mutase (2,3-diphosphoglycerate-dependent).	2-phospho-D-glycerate = 3-phospho-D-glycerate.	Autism
291516108	Alistipes shahii WAL 8301	5.4.2.11	Phosphoglycerate mutase (2,3-diphosphoglycerate-dependent).	2-phospho-D-glycerate = 3-phospho-D-glycerate.	Control
110676061	Clostridium perfringens ATCC 13124	5.4.2.11	Phosphoglycerate mutase (2,3-diphosphoglycerate-dependent).	2-phospho-D-glycerate = 3-phospho-D-glycerate.	Autism
291516108	Alistipes shahii WAL 8301	5.4.2.11	Phosphoglycerate mutase (2,3-diphosphoglycerate-dependent).	2-phospho-D-glycerate = 3-phospho-D-glycerate.	Control
219869941	Desulfovibrio desulfuricans ATCC 27774	5.4.2.11	Phosphoglycerate mutase (2,3-diphosphoglycerate-dependent).	2-phospho-D-glycerate = 3-phospho-D-glycerate.	Autism
291516108	Alistipes shahii WAL 8301	5.4.2.11	Phosphoglycerate mutase (2,3-diphosphoglycerate-dependent).	2-phospho-D-glycerate = 3-phospho-D-glycerate.	Control
115252745	Peptoclostridium difficile 630	5.4.2.11	Phosphoglycerate mutase (2,3-diphosphoglycerate-dependent).	2-phospho-D-glycerate = 3-phospho-D-glycerate.	Autism
291516108	Alistipes shahii WAL 8301	1.1.1.28	D-lactate dehydrogenase.	(R)-lactate + NAD(+) = pyruvate + NADH.	Control
115252745	Peptoclostridium difficile 630	1.1.1.28	D-lactate dehydrogenase.	(R)-lactate + NAD(+) = pyruvate + NADH.	Autism
291516108	Alistipes shahii WAL 8301	4.1.2.13	Fructose-bisphosphate aldolase.	D-fructose 1,6-bisphosphate = glycerone phosphate + D-glyceraldehyde3-phosphate.	Control
187426706	Akkermansia muciniphila ATCC BAA-835	4.1.2.13	Fructose-bisphosphate aldolase.	D-fructose 1,6-bisphosphate = glycerone phosphate + D-glyceraldehyde3-phosphate.	Autism
291516108	Alistipes shahii WAL 8301	4.1.2.13	Fructose-bisphosphate aldolase.	D-fructose 1,6-bisphosphate = glycerone phosphate + D-glyceraldehyde3-phosphate.	Control
110676061	Clostridium perfringens ATCC 13124	4.1.2.13	Fructose-bisphosphate aldolase.	D-fructose 1,6-bisphosphate = glycerone phosphate + D-glyceraldehyde3-phosphate.	Autism
291516108	Alistipes shahii WAL 8301	4.1.2.13	Fructose-bisphosphate aldolase.	D-fructose 1,6-bisphosphate = glycerone phosphate + D-glyceraldehyde3-phosphate.	Control
219869941	Desulfovibrio desulfuricans ATCC 27774	4.1.2.13	Fructose-bisphosphate aldolase.	D-fructose 1,6-bisphosphate = glycerone phosphate + D-glyceraldehyde3-phosphate.	Autism
291516108	Alistipes shahii WAL 8301	4.1.2.13	Fructose-bisphosphate aldolase.	D-fructose 1,6-bisphosphate = glycerone phosphate + D-glyceraldehyde3-phosphate.	Control
219869941	Desulfovibrio desulfuricans ATCC 27774	4.1.2.13	Fructose-bisphosphate aldolase.	D-fructose 1,6-bisphosphate = glycerone phosphate + D-glyceraldehyde3-phosphate.	Autism
291516108	Alistipes shahii WAL 8301	4.1.2.13	Fructose-bisphosphate aldolase.	D-fructose 1,6-bisphosphate = glycerone phosphate + D-glyceraldehyde3-phosphate.	Control
115252745	Peptoclostridium difficile 630	4.1.2.13	Fructose-bisphosphate aldolase.	D-fructose 1,6-bisphosphate = glycerone phosphate + D-glyceraldehyde3-phosphate.	Autism
291516108	Alistipes shahii WAL 8301	4.1.2.13	Fructose-bisphosphate aldolase.	D-fructose 1,6-bisphosphate = glycerone phosphate + D-glyceraldehyde3-phosphate.	Control
115252745	Peptoclostridium difficile 630	4.1.2.13	Fructose-bisphosphate aldolase.	D-fructose 1,6-bisphosphate = glycerone phosphate + D-glyceraldehyde3-phosphate.	Autism
291516108	Alistipes shahii WAL 8301	1.1.1.3	Homoserine dehydrogenase.	L-homoserine + NAD(P)(+) = L-aspartate 4-semialdehyde + NAD(P)H.	Control
187426706	Akkermansia muciniphila ATCC BAA-835	1.1.1.3	Homoserine dehydrogenase.	L-homoserine + NAD(P)(+) = L-aspartate 4-semialdehyde + NAD(P)H.	Autism
291516108	Alistipes shahii WAL 8301	1.1.1.3	Homoserine dehydrogenase.	L-homoserine + NAD(P)(+) = L-aspartate 4-semialdehyde + NAD(P)H.	Control
219869941	Desulfovibrio desulfuricans ATCC 27774	1.1.1.3	Homoserine dehydrogenase.	L-homoserine + NAD(P)(+) = L-aspartate 4-semialdehyde + NAD(P)H.	Autism
291516108	Alistipes shahii WAL 8301	1.1.1.3	Homoserine dehydrogenase.	L-homoserine + NAD(P)(+) = L-aspartate 4-semialdehyde + NAD(P)H.	Control
115252745	Peptoclostridium difficile 630	1.1.1.3	Homoserine dehydrogenase.	L-homoserine + NAD(P)(+) = L-aspartate 4-semialdehyde + NAD(P)H.	Autism
291516108	Alistipes shahii WAL 8301	1.1.1.3	Homoserine dehydrogenase.	L-homoserine + NAD(P)(+) = L-aspartate 4-semialdehyde + NAD(P)H.	Control
115252745	Peptoclostridium difficile 630	1.1.1.3	Homoserine dehydrogenase.	L-homoserine + NAD(P)(+) = L-aspartate 4-semialdehyde + NAD(P)H.	Autism
291516108	Alistipes shahii WAL 8301	2.1.2.9	Methionyl-tRNA formyltransferase.	10-formyltetrahydrofolate + L-methionyl-tRNA(fMet) = tetrahydrofolate +N-formylmethionyl-tRNA(fMet).	Control
110676061	Clostridium perfringens ATCC 13124	2.1.2.9	Methionyl-tRNA formyltransferase.	10-formyltetrahydrofolate + L-methionyl-tRNA(fMet) = tetrahydrofolate +N-formylmethionyl-tRNA(fMet).	Autism
291516108	Alistipes shahii WAL 8301	2.1.2.9	Methionyl-tRNA formyltransferase.	10-formyltetrahydrofolate + L-methionyl-tRNA(fMet) = tetrahydrofolate +N-formylmethionyl-tRNA(fMet).	Control
110676061	Clostridium perfringens ATCC 13124	2.1.2.9	Methionyl-tRNA formyltransferase.	10-formyltetrahydrofolate + L-methionyl-tRNA(fMet) = tetrahydrofolate +N-formylmethionyl-tRNA(fMet).	Autism
291516108	Alistipes shahii WAL 8301	2.1.2.9	Methionyl-tRNA formyltransferase.	10-formyltetrahydrofolate + L-methionyl-tRNA(fMet) = tetrahydrofolate +N-formylmethionyl-tRNA(fMet).	Control
219869941	Desulfovibrio desulfuricans ATCC 27774	2.1.2.9	Methionyl-tRNA formyltransferase.	10-formyltetrahydrofolate + L-methionyl-tRNA(fMet) = tetrahydrofolate +N-formylmethionyl-tRNA(fMet).	Autism
291516108	Alistipes shahii WAL 8301	2.1.2.9	Methionyl-tRNA formyltransferase.	10-formyltetrahydrofolate + L-methionyl-tRNA(fMet) = tetrahydrofolate +N-formylmethionyl-tRNA(fMet).	Control
115252745	Peptoclostridium difficile 630	2.1.2.9	Methionyl-tRNA formyltransferase.	10-formyltetrahydrofolate + L-methionyl-tRNA(fMet) = tetrahydrofolate +N-formylmethionyl-tRNA(fMet).	Autism
291516108	Alistipes shahii WAL 8301	1.11.1.15	Peroxiredoxin.	2 R'-SH + ROOH = R'-S-S-R' + H(2)O + ROH.	Control
110676061	Clostridium perfringens ATCC 13124	1.11.1.15	Peroxiredoxin.	2 R'-SH + ROOH = R'-S-S-R' + H(2)O + ROH.	Autism
291516108	Alistipes shahii WAL 8301	1.11.1.15	Peroxiredoxin.	2 R'-SH + ROOH = R'-S-S-R' + H(2)O + ROH.	Control
115252745	Peptoclostridium difficile 630	1.11.1.15	Peroxiredoxin.	2 R'-SH + ROOH = R'-S-S-R' + H(2)O + ROH.	Autism
291516108	Alistipes shahii WAL 8301	1.11.1.15	Peroxiredoxin.	2 R'-SH + ROOH = R'-S-S-R' + H(2)O + ROH.	Control
115252745	Peptoclostridium difficile 630	1.11.1.15	Peroxiredoxin.	2 R'-SH + ROOH = R'-S-S-R' + H(2)O + ROH.	Autism
291516108	Alistipes shahii WAL 8301	1.1.1.95	Phosphoglycerate dehydrogenase.	(1) 3-phospho-D-glycerate + NAD(+) = 3-phosphonooxypyruvate + NADH.(2) 2-hydroxyglutarate + NAD(+) = 2-oxoglutarate + NADH.	Control
115252745	Peptoclostridium difficile 630	1.1.1.95	Phosphoglycerate dehydrogenase.	(1) 3-phospho-D-glycerate + NAD(+) = 3-phosphonooxypyruvate + NADH.(2) 2-hydroxyglutarate + NAD(+) = 2-oxoglutarate + NADH.	Autism
291516108	Alistipes shahii WAL 8301	2.7.4.8	Guanylate kinase.	ATP + GMP = ADP + GDP.	Control
187426706	Akkermansia muciniphila ATCC BAA-835	2.7.4.8	Guanylate kinase.	ATP + GMP = ADP + GDP.	Autism
291516108	Alistipes shahii WAL 8301	2.7.4.8	Guanylate kinase.	ATP + GMP = ADP + GDP.	Control
110676061	Clostridium perfringens ATCC 13124	2.7.4.8	Guanylate kinase.	ATP + GMP = ADP + GDP.	Autism
291516108	Alistipes shahii WAL 8301	2.7.4.8	Guanylate kinase.	ATP + GMP = ADP + GDP.	Control
219869941	Desulfovibrio desulfuricans ATCC 27774	2.7.4.8	Guanylate kinase.	ATP + GMP = ADP + GDP.	Autism
291516108	Alistipes shahii WAL 8301	2.7.4.8	Guanylate kinase.	ATP + GMP = ADP + GDP.	Control
115252745	Peptoclostridium difficile 630	2.7.4.8	Guanylate kinase.	ATP + GMP = ADP + GDP.	Autism
291516108	Alistipes shahii WAL 8301	2.7.7.18	Nicotinate-nucleotide adenylyltransferase.	ATP + beta-nicotinate-D-ribonucleotide = diphosphate + deamido-NAD(+).	Control
110676061	Clostridium perfringens ATCC 13124	2.7.7.18	Nicotinate-nucleotide adenylyltransferase.	ATP + beta-nicotinate-D-ribonucleotide = diphosphate + deamido-NAD(+).	Autism
291516108	Alistipes shahii WAL 8301	2.7.7.18	Nicotinate-nucleotide adenylyltransferase.	ATP + beta-nicotinate-D-ribonucleotide = diphosphate + deamido-NAD(+).	Control
115252745	Peptoclostridium difficile 630	2.7.7.18	Nicotinate-nucleotide adenylyltransferase.	ATP + beta-nicotinate-D-ribonucleotide = diphosphate + deamido-NAD(+).	Autism
291516108	Alistipes shahii WAL 8301	1.8.1.4	Dihydrolipoyl dehydrogenase.	Protein N(6)-(dihydrolipoyl)lysine + NAD(+) = protein N(6)-(lipoyl)lysine+ NADH.	Control
115252745	Peptoclostridium difficile 630	1.8.1.4	Dihydrolipoyl dehydrogenase.	Protein N(6)-(dihydrolipoyl)lysine + NAD(+) = protein N(6)-(lipoyl)lysine+ NADH.	Autism
291516108	Alistipes shahii WAL 8301	1.8.1.4	Dihydrolipoyl dehydrogenase.	Protein N(6)-(dihydrolipoyl)lysine + NAD(+) = protein N(6)-(lipoyl)lysine+ NADH.	Control
115252745	Peptoclostridium difficile 630	1.8.1.4	Dihydrolipoyl dehydrogenase.	Protein N(6)-(dihydrolipoyl)lysine + NAD(+) = protein N(6)-(lipoyl)lysine+ NADH.	Autism
291516108	Alistipes shahii WAL 8301	3.2.1.52	Beta-N-acetylhexosaminidase.	Hydrolysis of terminal non-reducing N-acetyl-D-hexosamine residues inN-acetyl-beta-D-hexosaminides.	Control
187426706	Akkermansia muciniphila ATCC BAA-835	3.2.1.52	Beta-N-acetylhexosaminidase.	Hydrolysis of terminal non-reducing N-acetyl-D-hexosamine residues inN-acetyl-beta-D-hexosaminides.	Autism
291516108	Alistipes shahii WAL 8301	3.2.1.52	Beta-N-acetylhexosaminidase.	Hydrolysis of terminal non-reducing N-acetyl-D-hexosamine residues inN-acetyl-beta-D-hexosaminides.	Control
187426706	Akkermansia muciniphila ATCC BAA-835	3.2.1.52	Beta-N-acetylhexosaminidase.	Hydrolysis of terminal non-reducing N-acetyl-D-hexosamine residues inN-acetyl-beta-D-hexosaminides.	Autism
291516108	Alistipes shahii WAL 8301	3.2.1.52	Beta-N-acetylhexosaminidase.	Hydrolysis of terminal non-reducing N-acetyl-D-hexosamine residues inN-acetyl-beta-D-hexosaminides.	Control
187426706	Akkermansia muciniphila ATCC BAA-835	3.2.1.52	Beta-N-acetylhexosaminidase.	Hydrolysis of terminal non-reducing N-acetyl-D-hexosamine residues inN-acetyl-beta-D-hexosaminides.	Autism
291516108	Alistipes shahii WAL 8301	3.2.1.52	Beta-N-acetylhexosaminidase.	Hydrolysis of terminal non-reducing N-acetyl-D-hexosamine residues inN-acetyl-beta-D-hexosaminides.	Control
187426706	Akkermansia muciniphila ATCC BAA-835	3.2.1.52	Beta-N-acetylhexosaminidase.	Hydrolysis of terminal non-reducing N-acetyl-D-hexosamine residues inN-acetyl-beta-D-hexosaminides.	Autism
291516108	Alistipes shahii WAL 8301	3.2.1.52	Beta-N-acetylhexosaminidase.	Hydrolysis of terminal non-reducing N-acetyl-D-hexosamine residues inN-acetyl-beta-D-hexosaminides.	Control
187426706	Akkermansia muciniphila ATCC BAA-835	3.2.1.52	Beta-N-acetylhexosaminidase.	Hydrolysis of terminal non-reducing N-acetyl-D-hexosamine residues inN-acetyl-beta-D-hexosaminides.	Autism
291516108	Alistipes shahii WAL 8301	3.2.1.52	Beta-N-acetylhexosaminidase.	Hydrolysis of terminal non-reducing N-acetyl-D-hexosamine residues inN-acetyl-beta-D-hexosaminides.	Control
187426706	Akkermansia muciniphila ATCC BAA-835	3.2.1.52	Beta-N-acetylhexosaminidase.	Hydrolysis of terminal non-reducing N-acetyl-D-hexosamine residues inN-acetyl-beta-D-hexosaminides.	Autism
291516108	Alistipes shahii WAL 8301	3.2.1.52	Beta-N-acetylhexosaminidase.	Hydrolysis of terminal non-reducing N-acetyl-D-hexosamine residues inN-acetyl-beta-D-hexosaminides.	Control
187426706	Akkermansia muciniphila ATCC BAA-835	3.2.1.52	Beta-N-acetylhexosaminidase.	Hydrolysis of terminal non-reducing N-acetyl-D-hexosamine residues inN-acetyl-beta-D-hexosaminides.	Autism
291516108	Alistipes shahii WAL 8301	3.2.1.52	Beta-N-acetylhexosaminidase.	Hydrolysis of terminal non-reducing N-acetyl-D-hexosamine residues inN-acetyl-beta-D-hexosaminides.	Control
187426706	Akkermansia muciniphila ATCC BAA-835	3.2.1.52	Beta-N-acetylhexosaminidase.	Hydrolysis of terminal non-reducing N-acetyl-D-hexosamine residues inN-acetyl-beta-D-hexosaminides.	Autism
291516108	Alistipes shahii WAL 8301	3.2.1.52	Beta-N-acetylhexosaminidase.	Hydrolysis of terminal non-reducing N-acetyl-D-hexosamine residues inN-acetyl-beta-D-hexosaminides.	Control
187426706	Akkermansia muciniphila ATCC BAA-835	3.2.1.52	Beta-N-acetylhexosaminidase.	Hydrolysis of terminal non-reducing N-acetyl-D-hexosamine residues inN-acetyl-beta-D-hexosaminides.	Autism
291516108	Alistipes shahii WAL 8301	3.2.1.52	Beta-N-acetylhexosaminidase.	Hydrolysis of terminal non-reducing N-acetyl-D-hexosamine residues inN-acetyl-beta-D-hexosaminides.	Control
187426706	Akkermansia muciniphila ATCC BAA-835	3.2.1.52	Beta-N-acetylhexosaminidase.	Hydrolysis of terminal non-reducing N-acetyl-D-hexosamine residues inN-acetyl-beta-D-hexosaminides.	Autism
291516108	Alistipes shahii WAL 8301	3.2.1.52	Beta-N-acetylhexosaminidase.	Hydrolysis of terminal non-reducing N-acetyl-D-hexosamine residues inN-acetyl-beta-D-hexosaminides.	Control
187426706	Akkermansia muciniphila ATCC BAA-835	3.2.1.52	Beta-N-acetylhexosaminidase.	Hydrolysis of terminal non-reducing N-acetyl-D-hexosamine residues inN-acetyl-beta-D-hexosaminides.	Autism
291516108	Alistipes shahii WAL 8301	3.2.1.52	Beta-N-acetylhexosaminidase.	Hydrolysis of terminal non-reducing N-acetyl-D-hexosamine residues inN-acetyl-beta-D-hexosaminides.	Control
110676061	Clostridium perfringens ATCC 13124	3.2.1.52	Beta-N-acetylhexosaminidase.	Hydrolysis of terminal non-reducing N-acetyl-D-hexosamine residues inN-acetyl-beta-D-hexosaminides.	Autism
291516108	Alistipes shahii WAL 8301	3.1.4.46	Glycerophosphodiester phosphodiesterase.	A glycerophosphodiester + H(2)O = an alcohol + sn-glycerol 3-phosphate.	Control
115252745	Peptoclostridium difficile 630	3.1.4.46	Glycerophosphodiester phosphodiesterase.	A glycerophosphodiester + H(2)O = an alcohol + sn-glycerol 3-phosphate.	Autism
291516108	Alistipes shahii WAL 8301	3.1.4.46	Glycerophosphodiester phosphodiesterase.	A glycerophosphodiester + H(2)O = an alcohol + sn-glycerol 3-phosphate.	Control
115252745	Peptoclostridium difficile 630	3.1.4.46	Glycerophosphodiester phosphodiesterase.	A glycerophosphodiester + H(2)O = an alcohol + sn-glycerol 3-phosphate.	Autism
291516108	Alistipes shahii WAL 8301	3.1.4.46	Glycerophosphodiester phosphodiesterase.	A glycerophosphodiester + H(2)O = an alcohol + sn-glycerol 3-phosphate.	Control
115252745	Peptoclostridium difficile 630	3.1.4.46	Glycerophosphodiester phosphodiesterase.	A glycerophosphodiester + H(2)O = an alcohol + sn-glycerol 3-phosphate.	Autism
291516108	Alistipes shahii WAL 8301	3.1.4.46	Glycerophosphodiester phosphodiesterase.	A glycerophosphodiester + H(2)O = an alcohol + sn-glycerol 3-phosphate.	Control
115252745	Peptoclostridium difficile 630	3.1.4.46	Glycerophosphodiester phosphodiesterase.	A glycerophosphodiester + H(2)O = an alcohol + sn-glycerol 3-phosphate.	Autism
291516108	Alistipes shahii WAL 8301	2.3.1.57	Diamine N-acetyltransferase.	Acetyl-CoA + an alkane-alpha,omega-diamine = CoA + an N-acetyldiamine.	Control
115252745	Peptoclostridium difficile 630	2.3.1.57	Diamine N-acetyltransferase.	Acetyl-CoA + an alkane-alpha,omega-diamine = CoA + an N-acetyldiamine.	Autism
291516108	Alistipes shahii WAL 8301	2.3.1.39	[Acyl-carrier-protein] S-malonyltransferase.	Malonyl-CoA + [acyl-carrier-protein] = CoA + malonyl-[acyl-carrier-protein].	Control
110676061	Clostridium perfringens ATCC 13124	2.3.1.39	[Acyl-carrier-protein] S-malonyltransferase.	Malonyl-CoA + [acyl-carrier-protein] = CoA + malonyl-[acyl-carrier-protein].	Autism
291516108	Alistipes shahii WAL 8301	2.3.1.39	[Acyl-carrier-protein] S-malonyltransferase.	Malonyl-CoA + [acyl-carrier-protein] = CoA + malonyl-[acyl-carrier-protein].	Control
115252745	Peptoclostridium difficile 630	2.3.1.39	[Acyl-carrier-protein] S-malonyltransferase.	Malonyl-CoA + [acyl-carrier-protein] = CoA + malonyl-[acyl-carrier-protein].	Autism
291516108	Alistipes shahii WAL 8301	3.5.99.6	Glucosamine-6-phosphate deaminase.	Alpha-D-glucosamine 6-phosphate + H(2)O = D-fructose 6-phosphate + NH(3).	Control
110676061	Clostridium perfringens ATCC 13124	3.5.99.6	Glucosamine-6-phosphate deaminase.	Alpha-D-glucosamine 6-phosphate + H(2)O = D-fructose 6-phosphate + NH(3).	Autism
291516108	Alistipes shahii WAL 8301	3.5.99.6	Glucosamine-6-phosphate deaminase.	Alpha-D-glucosamine 6-phosphate + H(2)O = D-fructose 6-phosphate + NH(3).	Control
115252745	Peptoclostridium difficile 630	3.5.99.6	Glucosamine-6-phosphate deaminase.	Alpha-D-glucosamine 6-phosphate + H(2)O = D-fructose 6-phosphate + NH(3).	Autism
291516108	Alistipes shahii WAL 8301	3.5.99.6	Glucosamine-6-phosphate deaminase.	Alpha-D-glucosamine 6-phosphate + H(2)O = D-fructose 6-phosphate + NH(3).	Control
110676061	Clostridium perfringens ATCC 13124	3.5.99.6	Glucosamine-6-phosphate deaminase.	Alpha-D-glucosamine 6-phosphate + H(2)O = D-fructose 6-phosphate + NH(3).	Autism
291516108	Alistipes shahii WAL 8301	3.5.99.6	Glucosamine-6-phosphate deaminase.	Alpha-D-glucosamine 6-phosphate + H(2)O = D-fructose 6-phosphate + NH(3).	Control
115252745	Peptoclostridium difficile 630	3.5.99.6	Glucosamine-6-phosphate deaminase.	Alpha-D-glucosamine 6-phosphate + H(2)O = D-fructose 6-phosphate + NH(3).	Autism
291516108	Alistipes shahii WAL 8301	5.3.1.8	Mannose-6-phosphate isomerase.	D-mannose 6-phosphate = D-fructose 6-phosphate.	Control
187426706	Akkermansia muciniphila ATCC BAA-835	5.3.1.8	Mannose-6-phosphate isomerase.	D-mannose 6-phosphate = D-fructose 6-phosphate.	Autism
291516108	Alistipes shahii WAL 8301	5.3.1.8	Mannose-6-phosphate isomerase.	D-mannose 6-phosphate = D-fructose 6-phosphate.	Control
110676061	Clostridium perfringens ATCC 13124	5.3.1.8	Mannose-6-phosphate isomerase.	D-mannose 6-phosphate = D-fructose 6-phosphate.	Autism
291516108	Alistipes shahii WAL 8301	5.3.1.8	Mannose-6-phosphate isomerase.	D-mannose 6-phosphate = D-fructose 6-phosphate.	Control
115252745	Peptoclostridium difficile 630	5.3.1.8	Mannose-6-phosphate isomerase.	D-mannose 6-phosphate = D-fructose 6-phosphate.	Autism
291516108	Alistipes shahii WAL 8301	2.2.1.6	Acetolactate synthase.	2 pyruvate = 2-acetolactate + CO(2).	Control
219869941	Desulfovibrio desulfuricans ATCC 27774	2.2.1.6	Acetolactate synthase.	2 pyruvate = 2-acetolactate + CO(2).	Autism
291516108	Alistipes shahii WAL 8301	2.2.1.6	Acetolactate synthase.	2 pyruvate = 2-acetolactate + CO(2).	Control
115252745	Peptoclostridium difficile 630	2.2.1.6	Acetolactate synthase.	2 pyruvate = 2-acetolactate + CO(2).	Autism
291516108	Alistipes shahii WAL 8301	2.2.1.6	Acetolactate synthase.	2 pyruvate = 2-acetolactate + CO(2).	Control
219869941	Desulfovibrio desulfuricans ATCC 27774	2.2.1.6	Acetolactate synthase.	2 pyruvate = 2-acetolactate + CO(2).	Autism
291516108	Alistipes shahii WAL 8301	2.2.1.6	Acetolactate synthase.	2 pyruvate = 2-acetolactate + CO(2).	Control
115252745	Peptoclostridium difficile 630	2.2.1.6	Acetolactate synthase.	2 pyruvate = 2-acetolactate + CO(2).	Autism
291516108	Alistipes shahii WAL 8301	4.2.1.9	Dihydroxy-acid dehydratase.	2,3-dihydroxy-3-methylbutanoate = 3-methyl-2-oxobutanoate + H(2)O.	Control
187426706	Akkermansia muciniphila ATCC BAA-835	4.2.1.9	Dihydroxy-acid dehydratase.	2,3-dihydroxy-3-methylbutanoate = 3-methyl-2-oxobutanoate + H(2)O.	Autism
291516108	Alistipes shahii WAL 8301	4.2.1.9	Dihydroxy-acid dehydratase.	2,3-dihydroxy-3-methylbutanoate = 3-methyl-2-oxobutanoate + H(2)O.	Control
219869941	Desulfovibrio desulfuricans ATCC 27774	4.2.1.9	Dihydroxy-acid dehydratase.	2,3-dihydroxy-3-methylbutanoate = 3-methyl-2-oxobutanoate + H(2)O.	Autism
291516108	Alistipes shahii WAL 8301	4.2.1.9	Dihydroxy-acid dehydratase.	2,3-dihydroxy-3-methylbutanoate = 3-methyl-2-oxobutanoate + H(2)O.	Control
115252745	Peptoclostridium difficile 630	4.2.1.9	Dihydroxy-acid dehydratase.	2,3-dihydroxy-3-methylbutanoate = 3-methyl-2-oxobutanoate + H(2)O.	Autism
291516108	Alistipes shahii WAL 8301	4.2.3.1	Threonine synthase.	O-phospho-L-homoserine + H(2)O = L-threonine + phosphate.	Control
219869941	Desulfovibrio desulfuricans ATCC 27774	4.2.3.1	Threonine synthase.	O-phospho-L-homoserine + H(2)O = L-threonine + phosphate.	Autism
291516108	Alistipes shahii WAL 8301	4.2.3.1	Threonine synthase.	O-phospho-L-homoserine + H(2)O = L-threonine + phosphate.	Control
115252745	Peptoclostridium difficile 630	4.2.3.1	Threonine synthase.	O-phospho-L-homoserine + H(2)O = L-threonine + phosphate.	Autism
291516108	Alistipes shahii WAL 8301	2.7.7.7	DNA-directed DNA polymerase.	Deoxynucleoside triphosphate + DNA(n) = diphosphate + DNA(n+1).	Control
187426706	Akkermansia muciniphila ATCC BAA-835	2.7.7.7	DNA-directed DNA polymerase.	Deoxynucleoside triphosphate + DNA(n) = diphosphate + DNA(n+1).	Autism
291516108	Alistipes shahii WAL 8301	2.7.7.7	DNA-directed DNA polymerase.	Deoxynucleoside triphosphate + DNA(n) = diphosphate + DNA(n+1).	Control
187426706	Akkermansia muciniphila ATCC BAA-835	2.7.7.7	DNA-directed DNA polymerase.	Deoxynucleoside triphosphate + DNA(n) = diphosphate + DNA(n+1).	Autism
291516108	Alistipes shahii WAL 8301	2.7.7.7	DNA-directed DNA polymerase.	Deoxynucleoside triphosphate + DNA(n) = diphosphate + DNA(n+1).	Control
187426706	Akkermansia muciniphila ATCC BAA-835	2.7.7.7	DNA-directed DNA polymerase.	Deoxynucleoside triphosphate + DNA(n) = diphosphate + DNA(n+1).	Autism
291516108	Alistipes shahii WAL 8301	2.7.7.7	DNA-directed DNA polymerase.	Deoxynucleoside triphosphate + DNA(n) = diphosphate + DNA(n+1).	Control
187426706	Akkermansia muciniphila ATCC BAA-835	2.7.7.7	DNA-directed DNA polymerase.	Deoxynucleoside triphosphate + DNA(n) = diphosphate + DNA(n+1).	Autism
291516108	Alistipes shahii WAL 8301	2.7.7.7	DNA-directed DNA polymerase.	Deoxynucleoside triphosphate + DNA(n) = diphosphate + DNA(n+1).	Control
187426706	Akkermansia muciniphila ATCC BAA-835	2.7.7.7	DNA-directed DNA polymerase.	Deoxynucleoside triphosphate + DNA(n) = diphosphate + DNA(n+1).	Autism
291516108	Alistipes shahii WAL 8301	2.7.7.7	DNA-directed DNA polymerase.	Deoxynucleoside triphosphate + DNA(n) = diphosphate + DNA(n+1).	Control
110676061	Clostridium perfringens ATCC 13124	2.7.7.7	DNA-directed DNA polymerase.	Deoxynucleoside triphosphate + DNA(n) = diphosphate + DNA(n+1).	Autism
291516108	Alistipes shahii WAL 8301	2.7.7.7	DNA-directed DNA polymerase.	Deoxynucleoside triphosphate + DNA(n) = diphosphate + DNA(n+1).	Control
110676061	Clostridium perfringens ATCC 13124	2.7.7.7	DNA-directed DNA polymerase.	Deoxynucleoside triphosphate + DNA(n) = diphosphate + DNA(n+1).	Autism
291516108	Alistipes shahii WAL 8301	2.7.7.7	DNA-directed DNA polymerase.	Deoxynucleoside triphosphate + DNA(n) = diphosphate + DNA(n+1).	Control
110676061	Clostridium perfringens ATCC 13124	2.7.7.7	DNA-directed DNA polymerase.	Deoxynucleoside triphosphate + DNA(n) = diphosphate + DNA(n+1).	Autism
291516108	Alistipes shahii WAL 8301	2.7.7.7	DNA-directed DNA polymerase.	Deoxynucleoside triphosphate + DNA(n) = diphosphate + DNA(n+1).	Control
110676061	Clostridium perfringens ATCC 13124	2.7.7.7	DNA-directed DNA polymerase.	Deoxynucleoside triphosphate + DNA(n) = diphosphate + DNA(n+1).	Autism
291516108	Alistipes shahii WAL 8301	2.7.7.7	DNA-directed DNA polymerase.	Deoxynucleoside triphosphate + DNA(n) = diphosphate + DNA(n+1).	Control
110676061	Clostridium perfringens ATCC 13124	2.7.7.7	DNA-directed DNA polymerase.	Deoxynucleoside triphosphate + DNA(n) = diphosphate + DNA(n+1).	Autism
291516108	Alistipes shahii WAL 8301	2.7.7.7	DNA-directed DNA polymerase.	Deoxynucleoside triphosphate + DNA(n) = diphosphate + DNA(n+1).	Control
110676061	Clostridium perfringens ATCC 13124	2.7.7.7	DNA-directed DNA polymerase.	Deoxynucleoside triphosphate + DNA(n) = diphosphate + DNA(n+1).	Autism
291516108	Alistipes shahii WAL 8301	2.7.7.7	DNA-directed DNA polymerase.	Deoxynucleoside triphosphate + DNA(n) = diphosphate + DNA(n+1).	Control
219869941	Desulfovibrio desulfuricans ATCC 27774	2.7.7.7	DNA-directed DNA polymerase.	Deoxynucleoside triphosphate + DNA(n) = diphosphate + DNA(n+1).	Autism
291516108	Alistipes shahii WAL 8301	2.7.7.7	DNA-directed DNA polymerase.	Deoxynucleoside triphosphate + DNA(n) = diphosphate + DNA(n+1).	Control
219869941	Desulfovibrio desulfuricans ATCC 27774	2.7.7.7	DNA-directed DNA polymerase.	Deoxynucleoside triphosphate + DNA(n) = diphosphate + DNA(n+1).	Autism
291516108	Alistipes shahii WAL 8301	2.7.7.7	DNA-directed DNA polymerase.	Deoxynucleoside triphosphate + DNA(n) = diphosphate + DNA(n+1).	Control
219869941	Desulfovibrio desulfuricans ATCC 27774	2.7.7.7	DNA-directed DNA polymerase.	Deoxynucleoside triphosphate + DNA(n) = diphosphate + DNA(n+1).	Autism
291516108	Alistipes shahii WAL 8301	2.7.7.7	DNA-directed DNA polymerase.	Deoxynucleoside triphosphate + DNA(n) = diphosphate + DNA(n+1).	Control
219869941	Desulfovibrio desulfuricans ATCC 27774	2.7.7.7	DNA-directed DNA polymerase.	Deoxynucleoside triphosphate + DNA(n) = diphosphate + DNA(n+1).	Autism
291516108	Alistipes shahii WAL 8301	2.7.7.7	DNA-directed DNA polymerase.	Deoxynucleoside triphosphate + DNA(n) = diphosphate + DNA(n+1).	Control
219869941	Desulfovibrio desulfuricans ATCC 27774	2.7.7.7	DNA-directed DNA polymerase.	Deoxynucleoside triphosphate + DNA(n) = diphosphate + DNA(n+1).	Autism
291516108	Alistipes shahii WAL 8301	2.7.7.7	DNA-directed DNA polymerase.	Deoxynucleoside triphosphate + DNA(n) = diphosphate + DNA(n+1).	Control
115252745	Peptoclostridium difficile 630	2.7.7.7	DNA-directed DNA polymerase.	Deoxynucleoside triphosphate + DNA(n) = diphosphate + DNA(n+1).	Autism
291516108	Alistipes shahii WAL 8301	2.7.7.7	DNA-directed DNA polymerase.	Deoxynucleoside triphosphate + DNA(n) = diphosphate + DNA(n+1).	Control
115252745	Peptoclostridium difficile 630	2.7.7.7	DNA-directed DNA polymerase.	Deoxynucleoside triphosphate + DNA(n) = diphosphate + DNA(n+1).	Autism
291516108	Alistipes shahii WAL 8301	2.7.7.7	DNA-directed DNA polymerase.	Deoxynucleoside triphosphate + DNA(n) = diphosphate + DNA(n+1).	Control
115252745	Peptoclostridium difficile 630	2.7.7.7	DNA-directed DNA polymerase.	Deoxynucleoside triphosphate + DNA(n) = diphosphate + DNA(n+1).	Autism
291516108	Alistipes shahii WAL 8301	2.7.7.7	DNA-directed DNA polymerase.	Deoxynucleoside triphosphate + DNA(n) = diphosphate + DNA(n+1).	Control
115252745	Peptoclostridium difficile 630	2.7.7.7	DNA-directed DNA polymerase.	Deoxynucleoside triphosphate + DNA(n) = diphosphate + DNA(n+1).	Autism
291516108	Alistipes shahii WAL 8301	2.7.7.7	DNA-directed DNA polymerase.	Deoxynucleoside triphosphate + DNA(n) = diphosphate + DNA(n+1).	Control
115252745	Peptoclostridium difficile 630	2.7.7.7	DNA-directed DNA polymerase.	Deoxynucleoside triphosphate + DNA(n) = diphosphate + DNA(n+1).	Autism
291516108	Alistipes shahii WAL 8301	2.7.7.7	DNA-directed DNA polymerase.	Deoxynucleoside triphosphate + DNA(n) = diphosphate + DNA(n+1).	Control
115252745	Peptoclostridium difficile 630	2.7.7.7	DNA-directed DNA polymerase.	Deoxynucleoside triphosphate + DNA(n) = diphosphate + DNA(n+1).	Autism
291516108	Alistipes shahii WAL 8301	2.7.7.7	DNA-directed DNA polymerase.	Deoxynucleoside triphosphate + DNA(n) = diphosphate + DNA(n+1).	Control
115252745	Peptoclostridium difficile 630	2.7.7.7	DNA-directed DNA polymerase.	Deoxynucleoside triphosphate + DNA(n) = diphosphate + DNA(n+1).	Autism
291516108	Alistipes shahii WAL 8301	2.7.7.7	DNA-directed DNA polymerase.	Deoxynucleoside triphosphate + DNA(n) = diphosphate + DNA(n+1).	Control
115252745	Peptoclostridium difficile 630	2.7.7.7	DNA-directed DNA polymerase.	Deoxynucleoside triphosphate + DNA(n) = diphosphate + DNA(n+1).	Autism
291516108	Alistipes shahii WAL 8301	3.2.1.51	Alpha-L-fucosidase.	An alpha-L-fucoside + H(2)O = L-fucose + an alcohol.	Control
187426706	Akkermansia muciniphila ATCC BAA-835	3.2.1.51	Alpha-L-fucosidase.	An alpha-L-fucoside + H(2)O = L-fucose + an alcohol.	Autism
291516108	Alistipes shahii WAL 8301	3.2.1.51	Alpha-L-fucosidase.	An alpha-L-fucoside + H(2)O = L-fucose + an alcohol.	Control
187426706	Akkermansia muciniphila ATCC BAA-835	3.2.1.51	Alpha-L-fucosidase.	An alpha-L-fucoside + H(2)O = L-fucose + an alcohol.	Autism
291516108	Alistipes shahii WAL 8301	2.1.1.37	DNA (cytosine-5-)-methyltransferase.	S-adenosyl-L-methionine + DNA = S-adenosyl-L-homocysteine +DNA containing 5-methylcytosine.	Control
110676061	Clostridium perfringens ATCC 13124	2.1.1.37	DNA (cytosine-5-)-methyltransferase.	S-adenosyl-L-methionine + DNA = S-adenosyl-L-homocysteine +DNA containing 5-methylcytosine.	Autism
291516108	Alistipes shahii WAL 8301	2.1.1.37	DNA (cytosine-5-)-methyltransferase.	S-adenosyl-L-methionine + DNA = S-adenosyl-L-homocysteine +DNA containing 5-methylcytosine.	Control
110676061	Clostridium perfringens ATCC 13124	2.1.1.37	DNA (cytosine-5-)-methyltransferase.	S-adenosyl-L-methionine + DNA = S-adenosyl-L-homocysteine +DNA containing 5-methylcytosine.	Autism
291516108	Alistipes shahii WAL 8301	2.1.1.37	DNA (cytosine-5-)-methyltransferase.	S-adenosyl-L-methionine + DNA = S-adenosyl-L-homocysteine +DNA containing 5-methylcytosine.	Control
110676061	Clostridium perfringens ATCC 13124	2.1.1.37	DNA (cytosine-5-)-methyltransferase.	S-adenosyl-L-methionine + DNA = S-adenosyl-L-homocysteine +DNA containing 5-methylcytosine.	Autism
291516108	Alistipes shahii WAL 8301	3.1.11.5	Exodeoxyribonuclease V.	Exonucleolytic cleavage (in the presence of ATP) in either 5'- to 3'- or3'- to 5'-direction to yield 5'-phosphooligonucleotides.	Control
219869941	Desulfovibrio desulfuricans ATCC 27774	3.1.11.5	Exodeoxyribonuclease V.	Exonucleolytic cleavage (in the presence of ATP) in either 5'- to 3'- or3'- to 5'-direction to yield 5'-phosphooligonucleotides.	Autism
291516108	Alistipes shahii WAL 8301	3.2.2.1	Purine nucleosidase.	A purine nucleoside + H(2)O = D-ribose + a purine base.	Control
115252745	Peptoclostridium difficile 630	3.2.2.1	Purine nucleosidase.	A purine nucleoside + H(2)O = D-ribose + a purine base.	Autism
291516108	Alistipes shahii WAL 8301	4.2.1.51	Prephenate dehydratase.	Prephenate = phenylpyruvate + H(2)O + CO(2).	Control
115252745	Peptoclostridium difficile 630	4.2.1.51	Prephenate dehydratase.	Prephenate = phenylpyruvate + H(2)O + CO(2).	Autism
291516108	Alistipes shahii WAL 8301	2.5.1.54	3-deoxy-7-phosphoheptulonate synthase.	Phosphoenolpyruvate + D-erythrose 4-phosphate + H(2)O = 3-deoxy-D-arabino-hept-2-ulosonate 7-phosphate + phosphate.	Control
187426706	Akkermansia muciniphila ATCC BAA-835	2.5.1.54	3-deoxy-7-phosphoheptulonate synthase.	Phosphoenolpyruvate + D-erythrose 4-phosphate + H(2)O = 3-deoxy-D-arabino-hept-2-ulosonate 7-phosphate + phosphate.	Autism
291516108	Alistipes shahii WAL 8301	2.5.1.54	3-deoxy-7-phosphoheptulonate synthase.	Phosphoenolpyruvate + D-erythrose 4-phosphate + H(2)O = 3-deoxy-D-arabino-hept-2-ulosonate 7-phosphate + phosphate.	Control
110676061	Clostridium perfringens ATCC 13124	2.5.1.54	3-deoxy-7-phosphoheptulonate synthase.	Phosphoenolpyruvate + D-erythrose 4-phosphate + H(2)O = 3-deoxy-D-arabino-hept-2-ulosonate 7-phosphate + phosphate.	Autism
291516108	Alistipes shahii WAL 8301	2.5.1.54	3-deoxy-7-phosphoheptulonate synthase.	Phosphoenolpyruvate + D-erythrose 4-phosphate + H(2)O = 3-deoxy-D-arabino-hept-2-ulosonate 7-phosphate + phosphate.	Control
115252745	Peptoclostridium difficile 630	2.5.1.54	3-deoxy-7-phosphoheptulonate synthase.	Phosphoenolpyruvate + D-erythrose 4-phosphate + H(2)O = 3-deoxy-D-arabino-hept-2-ulosonate 7-phosphate + phosphate.	Autism
291516108	Alistipes shahii WAL 8301	2.5.1.54	3-deoxy-7-phosphoheptulonate synthase.	Phosphoenolpyruvate + D-erythrose 4-phosphate + H(2)O = 3-deoxy-D-arabino-hept-2-ulosonate 7-phosphate + phosphate.	Control
115252745	Peptoclostridium difficile 630	2.5.1.54	3-deoxy-7-phosphoheptulonate synthase.	Phosphoenolpyruvate + D-erythrose 4-phosphate + H(2)O = 3-deoxy-D-arabino-hept-2-ulosonate 7-phosphate + phosphate.	Autism
291516108	Alistipes shahii WAL 8301	5.4.99.5	Chorismate mutase.	Chorismate = prephenate.	Control
110676061	Clostridium perfringens ATCC 13124	5.4.99.5	Chorismate mutase.	Chorismate = prephenate.	Autism
291516108	Alistipes shahii WAL 8301	5.4.99.5	Chorismate mutase.	Chorismate = prephenate.	Control
115252745	Peptoclostridium difficile 630	5.4.99.5	Chorismate mutase.	Chorismate = prephenate.	Autism
291516108	Alistipes shahii WAL 8301	2.3.1.54	Formate C-acetyltransferase.	Acetyl-CoA + formate = CoA + pyruvate.	Control
187426706	Akkermansia muciniphila ATCC BAA-835	2.3.1.54	Formate C-acetyltransferase.	Acetyl-CoA + formate = CoA + pyruvate.	Autism
291516108	Alistipes shahii WAL 8301	2.3.1.54	Formate C-acetyltransferase.	Acetyl-CoA + formate = CoA + pyruvate.	Control
110676061	Clostridium perfringens ATCC 13124	2.3.1.54	Formate C-acetyltransferase.	Acetyl-CoA + formate = CoA + pyruvate.	Autism
291516108	Alistipes shahii WAL 8301	2.3.1.54	Formate C-acetyltransferase.	Acetyl-CoA + formate = CoA + pyruvate.	Control
219869941	Desulfovibrio desulfuricans ATCC 27774	2.3.1.54	Formate C-acetyltransferase.	Acetyl-CoA + formate = CoA + pyruvate.	Autism
291516108	Alistipes shahii WAL 8301	2.3.1.54	Formate C-acetyltransferase.	Acetyl-CoA + formate = CoA + pyruvate.	Control
219869941	Desulfovibrio desulfuricans ATCC 27774	2.3.1.54	Formate C-acetyltransferase.	Acetyl-CoA + formate = CoA + pyruvate.	Autism
291516108	Alistipes shahii WAL 8301	2.3.1.54	Formate C-acetyltransferase.	Acetyl-CoA + formate = CoA + pyruvate.	Control
115252745	Peptoclostridium difficile 630	2.3.1.54	Formate C-acetyltransferase.	Acetyl-CoA + formate = CoA + pyruvate.	Autism
291516108	Alistipes shahii WAL 8301	2.3.1.54	Formate C-acetyltransferase.	Acetyl-CoA + formate = CoA + pyruvate.	Control
115252745	Peptoclostridium difficile 630	2.3.1.54	Formate C-acetyltransferase.	Acetyl-CoA + formate = CoA + pyruvate.	Autism
291516108	Alistipes shahii WAL 8301	2.3.1.54	Formate C-acetyltransferase.	Acetyl-CoA + formate = CoA + pyruvate.	Control
115252745	Peptoclostridium difficile 630	2.3.1.54	Formate C-acetyltransferase.	Acetyl-CoA + formate = CoA + pyruvate.	Autism
291516108	Alistipes shahii WAL 8301	1.97.1.4	[Formate-C-acetyltransferase]-activating enzyme.	S-adenosyl-L-methionine + dihydroflavodoxin + [formateC-acetyltransferase]-glycine = 5'-deoxyadenosine + L-methionine +flavodoxin semiquinone + [formate C-acetyltransferase]-glycin-2-ylradical.	Control
187426706	Akkermansia muciniphila ATCC BAA-835	1.97.1.4	[Formate-C-acetyltransferase]-activating enzyme.	S-adenosyl-L-methionine + dihydroflavodoxin + [formateC-acetyltransferase]-glycine = 5'-deoxyadenosine + L-methionine +flavodoxin semiquinone + [formate C-acetyltransferase]-glycin-2-ylradical.	Autism
291516108	Alistipes shahii WAL 8301	1.97.1.4	[Formate-C-acetyltransferase]-activating enzyme.	S-adenosyl-L-methionine + dihydroflavodoxin + [formateC-acetyltransferase]-glycine = 5'-deoxyadenosine + L-methionine +flavodoxin semiquinone + [formate C-acetyltransferase]-glycin-2-ylradical.	Control
110676061	Clostridium perfringens ATCC 13124	1.97.1.4	[Formate-C-acetyltransferase]-activating enzyme.	S-adenosyl-L-methionine + dihydroflavodoxin + [formateC-acetyltransferase]-glycine = 5'-deoxyadenosine + L-methionine +flavodoxin semiquinone + [formate C-acetyltransferase]-glycin-2-ylradical.	Autism
291516108	Alistipes shahii WAL 8301	1.97.1.4	[Formate-C-acetyltransferase]-activating enzyme.	S-adenosyl-L-methionine + dihydroflavodoxin + [formateC-acetyltransferase]-glycine = 5'-deoxyadenosine + L-methionine +flavodoxin semiquinone + [formate C-acetyltransferase]-glycin-2-ylradical.	Control
219869941	Desulfovibrio desulfuricans ATCC 27774	1.97.1.4	[Formate-C-acetyltransferase]-activating enzyme.	S-adenosyl-L-methionine + dihydroflavodoxin + [formateC-acetyltransferase]-glycine = 5'-deoxyadenosine + L-methionine +flavodoxin semiquinone + [formate C-acetyltransferase]-glycin-2-ylradical.	Autism
291516108	Alistipes shahii WAL 8301	1.97.1.4	[Formate-C-acetyltransferase]-activating enzyme.	S-adenosyl-L-methionine + dihydroflavodoxin + [formateC-acetyltransferase]-glycine = 5'-deoxyadenosine + L-methionine +flavodoxin semiquinone + [formate C-acetyltransferase]-glycin-2-ylradical.	Control
219869941	Desulfovibrio desulfuricans ATCC 27774	1.97.1.4	[Formate-C-acetyltransferase]-activating enzyme.	S-adenosyl-L-methionine + dihydroflavodoxin + [formateC-acetyltransferase]-glycine = 5'-deoxyadenosine + L-methionine +flavodoxin semiquinone + [formate C-acetyltransferase]-glycin-2-ylradical.	Autism
291516108	Alistipes shahii WAL 8301	1.97.1.4	[Formate-C-acetyltransferase]-activating enzyme.	S-adenosyl-L-methionine + dihydroflavodoxin + [formateC-acetyltransferase]-glycine = 5'-deoxyadenosine + L-methionine +flavodoxin semiquinone + [formate C-acetyltransferase]-glycin-2-ylradical.	Control
115252745	Peptoclostridium difficile 630	1.97.1.4	[Formate-C-acetyltransferase]-activating enzyme.	S-adenosyl-L-methionine + dihydroflavodoxin + [formateC-acetyltransferase]-glycine = 5'-deoxyadenosine + L-methionine +flavodoxin semiquinone + [formate C-acetyltransferase]-glycin-2-ylradical.	Autism
291516108	Alistipes shahii WAL 8301	1.97.1.4	[Formate-C-acetyltransferase]-activating enzyme.	S-adenosyl-L-methionine + dihydroflavodoxin + [formateC-acetyltransferase]-glycine = 5'-deoxyadenosine + L-methionine +flavodoxin semiquinone + [formate C-acetyltransferase]-glycin-2-ylradical.	Control
115252745	Peptoclostridium difficile 630	1.97.1.4	[Formate-C-acetyltransferase]-activating enzyme.	S-adenosyl-L-methionine + dihydroflavodoxin + [formateC-acetyltransferase]-glycine = 5'-deoxyadenosine + L-methionine +flavodoxin semiquinone + [formate C-acetyltransferase]-glycin-2-ylradical.	Autism
291516108	Alistipes shahii WAL 8301	1.97.1.4	[Formate-C-acetyltransferase]-activating enzyme.	S-adenosyl-L-methionine + dihydroflavodoxin + [formateC-acetyltransferase]-glycine = 5'-deoxyadenosine + L-methionine +flavodoxin semiquinone + [formate C-acetyltransferase]-glycin-2-ylradical.	Control
115252745	Peptoclostridium difficile 630	1.97.1.4	[Formate-C-acetyltransferase]-activating enzyme.	S-adenosyl-L-methionine + dihydroflavodoxin + [formateC-acetyltransferase]-glycine = 5'-deoxyadenosine + L-methionine +flavodoxin semiquinone + [formate C-acetyltransferase]-glycin-2-ylradical.	Autism
291516108	Alistipes shahii WAL 8301	1.97.1.4	[Formate-C-acetyltransferase]-activating enzyme.	S-adenosyl-L-methionine + dihydroflavodoxin + [formateC-acetyltransferase]-glycine = 5'-deoxyadenosine + L-methionine +flavodoxin semiquinone + [formate C-acetyltransferase]-glycin-2-ylradical.	Control
115252745	Peptoclostridium difficile 630	1.97.1.4	[Formate-C-acetyltransferase]-activating enzyme.	S-adenosyl-L-methionine + dihydroflavodoxin + [formateC-acetyltransferase]-glycine = 5'-deoxyadenosine + L-methionine +flavodoxin semiquinone + [formate C-acetyltransferase]-glycin-2-ylradical.	Autism
291516108	Alistipes shahii WAL 8301	3.6.3.4	Cu(2+)-exporting ATPase.	ATP + H(2)O + Cu(2+)(Side 1) = ADP + phosphate + Cu(2+)(Side 2).	Control
110676061	Clostridium perfringens ATCC 13124	3.6.3.4	Cu(2+)-exporting ATPase.	ATP + H(2)O + Cu(2+)(Side 1) = ADP + phosphate + Cu(2+)(Side 2).	Autism
291516108	Alistipes shahii WAL 8301	3.6.3.4	Cu(2+)-exporting ATPase.	ATP + H(2)O + Cu(2+)(Side 1) = ADP + phosphate + Cu(2+)(Side 2).	Control
115252745	Peptoclostridium difficile 630	3.6.3.4	Cu(2+)-exporting ATPase.	ATP + H(2)O + Cu(2+)(Side 1) = ADP + phosphate + Cu(2+)(Side 2).	Autism
291516108	Alistipes shahii WAL 8301	2.3.1.29	Glycine C-acetyltransferase.	Acetyl-CoA + glycine = CoA + 2-amino-3-oxobutanoate.	Control
219869941	Desulfovibrio desulfuricans ATCC 27774	2.3.1.29	Glycine C-acetyltransferase.	Acetyl-CoA + glycine = CoA + 2-amino-3-oxobutanoate.	Autism
291516108	Alistipes shahii WAL 8301	2.7.4.22	UMP kinase.	ATP + UMP = ADP + UDP.	Control
110676061	Clostridium perfringens ATCC 13124	2.7.4.22	UMP kinase.	ATP + UMP = ADP + UDP.	Autism
291516108	Alistipes shahii WAL 8301	2.7.4.22	UMP kinase.	ATP + UMP = ADP + UDP.	Control
115252745	Peptoclostridium difficile 630	2.7.4.22	UMP kinase.	ATP + UMP = ADP + UDP.	Autism
291516108	Alistipes shahii WAL 8301	1.3.99.22	Coproporphyrinogen dehydrogenase.	Coproporphyrinogen-III + 2 S-adenosyl-L-methionine = protoporphyrinogen-IX + 2 CO(2) + 2 L-methionine + 2 5'-deoxyadenosine.	Control
187426706	Akkermansia muciniphila ATCC BAA-835	1.3.99.22	Coproporphyrinogen dehydrogenase.	Coproporphyrinogen-III + 2 S-adenosyl-L-methionine = protoporphyrinogen-IX + 2 CO(2) + 2 L-methionine + 2 5'-deoxyadenosine.	Autism
291516108	Alistipes shahii WAL 8301	1.3.99.22	Coproporphyrinogen dehydrogenase.	Coproporphyrinogen-III + 2 S-adenosyl-L-methionine = protoporphyrinogen-IX + 2 CO(2) + 2 L-methionine + 2 5'-deoxyadenosine.	Control
219869941	Desulfovibrio desulfuricans ATCC 27774	1.3.99.22	Coproporphyrinogen dehydrogenase.	Coproporphyrinogen-III + 2 S-adenosyl-L-methionine = protoporphyrinogen-IX + 2 CO(2) + 2 L-methionine + 2 5'-deoxyadenosine.	Autism
291516108	Alistipes shahii WAL 8301	1.3.99.22	Coproporphyrinogen dehydrogenase.	Coproporphyrinogen-III + 2 S-adenosyl-L-methionine = protoporphyrinogen-IX + 2 CO(2) + 2 L-methionine + 2 5'-deoxyadenosine.	Control
115252745	Peptoclostridium difficile 630	1.3.99.22	Coproporphyrinogen dehydrogenase.	Coproporphyrinogen-III + 2 S-adenosyl-L-methionine = protoporphyrinogen-IX + 2 CO(2) + 2 L-methionine + 2 5'-deoxyadenosine.	Autism
291516108	Alistipes shahii WAL 8301	1.3.99.22	Coproporphyrinogen dehydrogenase.	Coproporphyrinogen-III + 2 S-adenosyl-L-methionine = protoporphyrinogen-IX + 2 CO(2) + 2 L-methionine + 2 5'-deoxyadenosine.	Control
115252745	Peptoclostridium difficile 630	1.3.99.22	Coproporphyrinogen dehydrogenase.	Coproporphyrinogen-III + 2 S-adenosyl-L-methionine = protoporphyrinogen-IX + 2 CO(2) + 2 L-methionine + 2 5'-deoxyadenosine.	Autism
291516108	Alistipes shahii WAL 8301	2.4.1.1	Glycogen phosphorylase.	((1->4)-alpha-D-glucosyl)(n) + phosphate = ((1->4)-alpha-D-glucosyl)(n-1)+ alpha-D-glucose 1-phosphate.	Control
187426706	Akkermansia muciniphila ATCC BAA-835	2.4.1.1	Glycogen phosphorylase.	((1->4)-alpha-D-glucosyl)(n) + phosphate = ((1->4)-alpha-D-glucosyl)(n-1)+ alpha-D-glucose 1-phosphate.	Autism
291516108	Alistipes shahii WAL 8301	2.4.1.1	Glycogen phosphorylase.	((1->4)-alpha-D-glucosyl)(n) + phosphate = ((1->4)-alpha-D-glucosyl)(n-1)+ alpha-D-glucose 1-phosphate.	Control
110676061	Clostridium perfringens ATCC 13124	2.4.1.1	Glycogen phosphorylase.	((1->4)-alpha-D-glucosyl)(n) + phosphate = ((1->4)-alpha-D-glucosyl)(n-1)+ alpha-D-glucose 1-phosphate.	Autism
291516108	Alistipes shahii WAL 8301	2.4.1.1	Glycogen phosphorylase.	((1->4)-alpha-D-glucosyl)(n) + phosphate = ((1->4)-alpha-D-glucosyl)(n-1)+ alpha-D-glucose 1-phosphate.	Control
219869941	Desulfovibrio desulfuricans ATCC 27774	2.4.1.1	Glycogen phosphorylase.	((1->4)-alpha-D-glucosyl)(n) + phosphate = ((1->4)-alpha-D-glucosyl)(n-1)+ alpha-D-glucose 1-phosphate.	Autism
291516108	Alistipes shahii WAL 8301	2.4.1.1	Glycogen phosphorylase.	((1->4)-alpha-D-glucosyl)(n) + phosphate = ((1->4)-alpha-D-glucosyl)(n-1)+ alpha-D-glucose 1-phosphate.	Control
115252745	Peptoclostridium difficile 630	2.4.1.1	Glycogen phosphorylase.	((1->4)-alpha-D-glucosyl)(n) + phosphate = ((1->4)-alpha-D-glucosyl)(n-1)+ alpha-D-glucose 1-phosphate.	Autism
291516108	Alistipes shahii WAL 8301	2.4.1.11	Glycogen(starch) synthase.	UDP-glucose ((1->4)-alpha-D-glucosyl)(n) = UDP + ((1->4)-alpha-D-glucosyl)(n+1).	Control
219869941	Desulfovibrio desulfuricans ATCC 27774	2.4.1.11	Glycogen(starch) synthase.	UDP-glucose ((1->4)-alpha-D-glucosyl)(n) = UDP + ((1->4)-alpha-D-glucosyl)(n+1).	Autism
291516108	Alistipes shahii WAL 8301	3.2.1.1	Alpha-amylase.	Endohydrolysis of (1->4)-alpha-D-glucosidic linkages in polysaccharidescontaining three or more (1->4)-alpha-linked D-glucose units.	Control
219869941	Desulfovibrio desulfuricans ATCC 27774	3.2.1.1	Alpha-amylase.	Endohydrolysis of (1->4)-alpha-D-glucosidic linkages in polysaccharidescontaining three or more (1->4)-alpha-linked D-glucose units.	Autism
291516108	Alistipes shahii WAL 8301	2.7.7.8	Polyribonucleotide nucleotidyltransferase.	RNA(n+1) + phosphate = RNA(n) + a nucleoside diphosphate.	Control
187426706	Akkermansia muciniphila ATCC BAA-835	2.7.7.8	Polyribonucleotide nucleotidyltransferase.	RNA(n+1) + phosphate = RNA(n) + a nucleoside diphosphate.	Autism
291516108	Alistipes shahii WAL 8301	2.7.7.8	Polyribonucleotide nucleotidyltransferase.	RNA(n+1) + phosphate = RNA(n) + a nucleoside diphosphate.	Control
110676061	Clostridium perfringens ATCC 13124	2.7.7.8	Polyribonucleotide nucleotidyltransferase.	RNA(n+1) + phosphate = RNA(n) + a nucleoside diphosphate.	Autism
291516108	Alistipes shahii WAL 8301	2.7.7.8	Polyribonucleotide nucleotidyltransferase.	RNA(n+1) + phosphate = RNA(n) + a nucleoside diphosphate.	Control
219869941	Desulfovibrio desulfuricans ATCC 27774	2.7.7.8	Polyribonucleotide nucleotidyltransferase.	RNA(n+1) + phosphate = RNA(n) + a nucleoside diphosphate.	Autism
291516108	Alistipes shahii WAL 8301	2.7.7.8	Polyribonucleotide nucleotidyltransferase.	RNA(n+1) + phosphate = RNA(n) + a nucleoside diphosphate.	Control
115252745	Peptoclostridium difficile 630	2.7.7.8	Polyribonucleotide nucleotidyltransferase.	RNA(n+1) + phosphate = RNA(n) + a nucleoside diphosphate.	Autism
291516108	Alistipes shahii WAL 8301	4.1.2.4	Deoxyribose-phosphate aldolase.	2-deoxy-D-ribose 5-phosphate = D-glyceraldehyde 3-phosphate +acetaldehyde.	Control
110676061	Clostridium perfringens ATCC 13124	4.1.2.4	Deoxyribose-phosphate aldolase.	2-deoxy-D-ribose 5-phosphate = D-glyceraldehyde 3-phosphate +acetaldehyde.	Autism
291516108	Alistipes shahii WAL 8301	4.1.2.4	Deoxyribose-phosphate aldolase.	2-deoxy-D-ribose 5-phosphate = D-glyceraldehyde 3-phosphate +acetaldehyde.	Control
115252745	Peptoclostridium difficile 630	4.1.2.4	Deoxyribose-phosphate aldolase.	2-deoxy-D-ribose 5-phosphate = D-glyceraldehyde 3-phosphate +acetaldehyde.	Autism
291516108	Alistipes shahii WAL 8301	3.4.21.102	C-terminal processing peptidase.	The enzyme shows specific recognition of a C-terminal tripeptide, Xaa-Yaa-Zaa, in which Xaa is preferably Ala or Leu, Yaa is preferably Ala orTyr, and Zaa is preferably Ala, but then cleaves at a variable distancefrom the C-terminus. A typical cleavage is -Ala-Ala-|-Arg-Ala-Ala-Lys-Glu-Asn-Tyr-Ala-L	Control
187426706	Akkermansia muciniphila ATCC BAA-835	3.4.21.102	C-terminal processing peptidase.	The enzyme shows specific recognition of a C-terminal tripeptide, Xaa-Yaa-Zaa, in which Xaa is preferably Ala or Leu, Yaa is preferably Ala orTyr, and Zaa is preferably Ala, but then cleaves at a variable distancefrom the C-terminus. A typical cleavage is -Ala-Ala-|-Arg-Ala-Ala-Lys-Glu-Asn-Tyr-Ala-L	Autism
291516108	Alistipes shahii WAL 8301	3.4.21.102	C-terminal processing peptidase.	The enzyme shows specific recognition of a C-terminal tripeptide, Xaa-Yaa-Zaa, in which Xaa is preferably Ala or Leu, Yaa is preferably Ala orTyr, and Zaa is preferably Ala, but then cleaves at a variable distancefrom the C-terminus. A typical cleavage is -Ala-Ala-|-Arg-Ala-Ala-Lys-Glu-Asn-Tyr-Ala-L	Control
219869941	Desulfovibrio desulfuricans ATCC 27774	3.4.21.102	C-terminal processing peptidase.	The enzyme shows specific recognition of a C-terminal tripeptide, Xaa-Yaa-Zaa, in which Xaa is preferably Ala or Leu, Yaa is preferably Ala orTyr, and Zaa is preferably Ala, but then cleaves at a variable distancefrom the C-terminus. A typical cleavage is -Ala-Ala-|-Arg-Ala-Ala-Lys-Glu-Asn-Tyr-Ala-L	Autism
291516108	Alistipes shahii WAL 8301	3.4.21.102	C-terminal processing peptidase.	The enzyme shows specific recognition of a C-terminal tripeptide, Xaa-Yaa-Zaa, in which Xaa is preferably Ala or Leu, Yaa is preferably Ala orTyr, and Zaa is preferably Ala, but then cleaves at a variable distancefrom the C-terminus. A typical cleavage is -Ala-Ala-|-Arg-Ala-Ala-Lys-Glu-Asn-Tyr-Ala-L	Control
115252745	Peptoclostridium difficile 630	3.4.21.102	C-terminal processing peptidase.	The enzyme shows specific recognition of a C-terminal tripeptide, Xaa-Yaa-Zaa, in which Xaa is preferably Ala or Leu, Yaa is preferably Ala orTyr, and Zaa is preferably Ala, but then cleaves at a variable distancefrom the C-terminus. A typical cleavage is -Ala-Ala-|-Arg-Ala-Ala-Lys-Glu-Asn-Tyr-Ala-L	Autism
291516108	Alistipes shahii WAL 8301	3.1.21.2	Deoxyribonuclease IV.	Endonucleolytic cleavage to 5'-phosphooligonucleotide end-products.	Control
187426706	Akkermansia muciniphila ATCC BAA-835	3.1.21.2	Deoxyribonuclease IV.	Endonucleolytic cleavage to 5'-phosphooligonucleotide end-products.	Autism
291516108	Alistipes shahii WAL 8301	3.1.21.2	Deoxyribonuclease IV.	Endonucleolytic cleavage to 5'-phosphooligonucleotide end-products.	Control
115252745	Peptoclostridium difficile 630	3.1.21.2	Deoxyribonuclease IV.	Endonucleolytic cleavage to 5'-phosphooligonucleotide end-products.	Autism
291516108	Alistipes shahii WAL 8301	2.1.1.34	tRNA (guanosine(18)-2'-O)-methyltransferase.	S-adenosyl-L-methionine + guanosine(18) in tRNA = S-adenosyl-L-homocysteine + 2'-O-methylguanosine(18) in tRNA.	Control
219869941	Desulfovibrio desulfuricans ATCC 27774	2.1.1.34	tRNA (guanosine(18)-2'-O)-methyltransferase.	S-adenosyl-L-methionine + guanosine(18) in tRNA = S-adenosyl-L-homocysteine + 2'-O-methylguanosine(18) in tRNA.	Autism
291516108	Alistipes shahii WAL 8301	2.5.1.10	(2E,6E)-farnesyl diphosphate synthase.	Geranyl diphosphate + isopentenyl diphosphate = diphosphate + (2E,6E)-farnesyl diphosphate.	Control
110676061	Clostridium perfringens ATCC 13124	2.5.1.10	(2E,6E)-farnesyl diphosphate synthase.	Geranyl diphosphate + isopentenyl diphosphate = diphosphate + (2E,6E)-farnesyl diphosphate.	Autism
291516108	Alistipes shahii WAL 8301	2.5.1.10	(2E,6E)-farnesyl diphosphate synthase.	Geranyl diphosphate + isopentenyl diphosphate = diphosphate + (2E,6E)-farnesyl diphosphate.	Control
115252745	Peptoclostridium difficile 630	2.5.1.10	(2E,6E)-farnesyl diphosphate synthase.	Geranyl diphosphate + isopentenyl diphosphate = diphosphate + (2E,6E)-farnesyl diphosphate.	Autism
291516108	Alistipes shahii WAL 8301	3.4.11.9	Xaa-Pro aminopeptidase.	Release of any N-terminal amino acid, including proline, that is linkedto proline, even from a dipeptide or tripeptide.	Control
110676061	Clostridium perfringens ATCC 13124	3.4.11.9	Xaa-Pro aminopeptidase.	Release of any N-terminal amino acid, including proline, that is linkedto proline, even from a dipeptide or tripeptide.	Autism
291516108	Alistipes shahii WAL 8301	3.4.11.9	Xaa-Pro aminopeptidase.	Release of any N-terminal amino acid, including proline, that is linkedto proline, even from a dipeptide or tripeptide.	Control
115252745	Peptoclostridium difficile 630	3.4.11.9	Xaa-Pro aminopeptidase.	Release of any N-terminal amino acid, including proline, that is linkedto proline, even from a dipeptide or tripeptide.	Autism
291516108	Alistipes shahii WAL 8301	5.1.3.3	Aldose 1-epimerase.	Alpha-D-glucose = beta-D-glucose.	Control
187426706	Akkermansia muciniphila ATCC BAA-835	5.1.3.3	Aldose 1-epimerase.	Alpha-D-glucose = beta-D-glucose.	Autism
291516108	Alistipes shahii WAL 8301	5.1.3.3	Aldose 1-epimerase.	Alpha-D-glucose = beta-D-glucose.	Control
110676061	Clostridium perfringens ATCC 13124	5.1.3.3	Aldose 1-epimerase.	Alpha-D-glucose = beta-D-glucose.	Autism
291516108	Alistipes shahii WAL 8301	6.1.1.18	Glutamine--tRNA ligase.	ATP + L-glutamine + tRNA(Gln) = AMP + diphosphate + L-glutaminyl-tRNA(Gln).	Control
110676061	Clostridium perfringens ATCC 13124	6.1.1.18	Glutamine--tRNA ligase.	ATP + L-glutamine + tRNA(Gln) = AMP + diphosphate + L-glutaminyl-tRNA(Gln).	Autism
291516108	Alistipes shahii WAL 8301	6.1.1.18	Glutamine--tRNA ligase.	ATP + L-glutamine + tRNA(Gln) = AMP + diphosphate + L-glutaminyl-tRNA(Gln).	Control
219869941	Desulfovibrio desulfuricans ATCC 27774	6.1.1.18	Glutamine--tRNA ligase.	ATP + L-glutamine + tRNA(Gln) = AMP + diphosphate + L-glutaminyl-tRNA(Gln).	Autism
291516108	Alistipes shahii WAL 8301	6.1.1.18	Glutamine--tRNA ligase.	ATP + L-glutamine + tRNA(Gln) = AMP + diphosphate + L-glutaminyl-tRNA(Gln).	Control
115252745	Peptoclostridium difficile 630	6.1.1.18	Glutamine--tRNA ligase.	ATP + L-glutamine + tRNA(Gln) = AMP + diphosphate + L-glutaminyl-tRNA(Gln).	Autism
291516108	Alistipes shahii WAL 8301	2.1.2.11	3-methyl-2-oxobutanoate hydroxymethyltransferase.	5,10-methylenetetrahydrofolate + 3-methyl-2-oxobutanoate + H(2)O =tetrahydrofolate + 2-dehydropantoate.	Control
187426706	Akkermansia muciniphila ATCC BAA-835	2.1.2.11	3-methyl-2-oxobutanoate hydroxymethyltransferase.	5,10-methylenetetrahydrofolate + 3-methyl-2-oxobutanoate + H(2)O =tetrahydrofolate + 2-dehydropantoate.	Autism
291516108	Alistipes shahii WAL 8301	2.1.2.11	3-methyl-2-oxobutanoate hydroxymethyltransferase.	5,10-methylenetetrahydrofolate + 3-methyl-2-oxobutanoate + H(2)O =tetrahydrofolate + 2-dehydropantoate.	Control
219869941	Desulfovibrio desulfuricans ATCC 27774	2.1.2.11	3-methyl-2-oxobutanoate hydroxymethyltransferase.	5,10-methylenetetrahydrofolate + 3-methyl-2-oxobutanoate + H(2)O =tetrahydrofolate + 2-dehydropantoate.	Autism
291516108	Alistipes shahii WAL 8301	2.1.2.11	3-methyl-2-oxobutanoate hydroxymethyltransferase.	5,10-methylenetetrahydrofolate + 3-methyl-2-oxobutanoate + H(2)O =tetrahydrofolate + 2-dehydropantoate.	Control
115252745	Peptoclostridium difficile 630	2.1.2.11	3-methyl-2-oxobutanoate hydroxymethyltransferase.	5,10-methylenetetrahydrofolate + 3-methyl-2-oxobutanoate + H(2)O =tetrahydrofolate + 2-dehydropantoate.	Autism
291516108	Alistipes shahii WAL 8301	1.1.1.205	IMP dehydrogenase.	Inosine 5'-phosphate + NAD(+) + H(2)O = xanthosine 5'-phosphate + NADH.	Control
110676061	Clostridium perfringens ATCC 13124	1.1.1.205	IMP dehydrogenase.	Inosine 5'-phosphate + NAD(+) + H(2)O = xanthosine 5'-phosphate + NADH.	Autism
291516108	Alistipes shahii WAL 8301	1.1.1.205	IMP dehydrogenase.	Inosine 5'-phosphate + NAD(+) + H(2)O = xanthosine 5'-phosphate + NADH.	Control
115252745	Peptoclostridium difficile 630	1.1.1.205	IMP dehydrogenase.	Inosine 5'-phosphate + NAD(+) + H(2)O = xanthosine 5'-phosphate + NADH.	Autism
291516108	Alistipes shahii WAL 8301	6.3.5.2	GMP synthase (glutamine-hydrolyzing).	ATP + XMP + L-glutamine + H(2)O = AMP + diphosphate + GMP + L-glutamate.	Control
110676061	Clostridium perfringens ATCC 13124	6.3.5.2	GMP synthase (glutamine-hydrolyzing).	ATP + XMP + L-glutamine + H(2)O = AMP + diphosphate + GMP + L-glutamate.	Autism
291516108	Alistipes shahii WAL 8301	6.3.5.2	GMP synthase (glutamine-hydrolyzing).	ATP + XMP + L-glutamine + H(2)O = AMP + diphosphate + GMP + L-glutamate.	Control
115252745	Peptoclostridium difficile 630	6.3.5.2	GMP synthase (glutamine-hydrolyzing).	ATP + XMP + L-glutamine + H(2)O = AMP + diphosphate + GMP + L-glutamate.	Autism
291516108	Alistipes shahii WAL 8301	2.8.1.7	Cysteine desulfurase.	L-cysteine + acceptor = L-alanine + S-sulfanyl-acceptor.	Control
110676061	Clostridium perfringens ATCC 13124	2.8.1.7	Cysteine desulfurase.	L-cysteine + acceptor = L-alanine + S-sulfanyl-acceptor.	Autism
291516108	Alistipes shahii WAL 8301	2.8.1.7	Cysteine desulfurase.	L-cysteine + acceptor = L-alanine + S-sulfanyl-acceptor.	Control
115252745	Peptoclostridium difficile 630	2.8.1.7	Cysteine desulfurase.	L-cysteine + acceptor = L-alanine + S-sulfanyl-acceptor.	Autism
291516108	Alistipes shahii WAL 8301	2.8.1.7	Cysteine desulfurase.	L-cysteine + acceptor = L-alanine + S-sulfanyl-acceptor.	Control
115252745	Peptoclostridium difficile 630	2.8.1.7	Cysteine desulfurase.	L-cysteine + acceptor = L-alanine + S-sulfanyl-acceptor.	Autism
291516108	Alistipes shahii WAL 8301	2.8.1.7	Cysteine desulfurase.	L-cysteine + acceptor = L-alanine + S-sulfanyl-acceptor.	Control
115252745	Peptoclostridium difficile 630	2.8.1.7	Cysteine desulfurase.	L-cysteine + acceptor = L-alanine + S-sulfanyl-acceptor.	Autism
291516108	Alistipes shahii WAL 8301	2.8.1.7	Cysteine desulfurase.	L-cysteine + acceptor = L-alanine + S-sulfanyl-acceptor.	Control
115252745	Peptoclostridium difficile 630	2.8.1.7	Cysteine desulfurase.	L-cysteine + acceptor = L-alanine + S-sulfanyl-acceptor.	Autism
291516108	Alistipes shahii WAL 8301	2.7.4.9	dTMP kinase.	ATP + dTMP = ADP + dTDP.	Control
187426706	Akkermansia muciniphila ATCC BAA-835	2.7.4.9	dTMP kinase.	ATP + dTMP = ADP + dTDP.	Autism
291516108	Alistipes shahii WAL 8301	2.7.4.9	dTMP kinase.	ATP + dTMP = ADP + dTDP.	Control
219869941	Desulfovibrio desulfuricans ATCC 27774	2.7.4.9	dTMP kinase.	ATP + dTMP = ADP + dTDP.	Autism
291516108	Alistipes shahii WAL 8301	2.7.4.9	dTMP kinase.	ATP + dTMP = ADP + dTDP.	Control
115252745	Peptoclostridium difficile 630	2.7.4.9	dTMP kinase.	ATP + dTMP = ADP + dTDP.	Autism
291516108	Alistipes shahii WAL 8301	1.15.1.1	Superoxide dismutase.	2 superoxide + 2 H(+) = O(2) + H(2)O(2).	Control
187426706	Akkermansia muciniphila ATCC BAA-835	1.15.1.1	Superoxide dismutase.	2 superoxide + 2 H(+) = O(2) + H(2)O(2).	Autism
291516108	Alistipes shahii WAL 8301	1.15.1.1	Superoxide dismutase.	2 superoxide + 2 H(+) = O(2) + H(2)O(2).	Control
110676061	Clostridium perfringens ATCC 13124	1.15.1.1	Superoxide dismutase.	2 superoxide + 2 H(+) = O(2) + H(2)O(2).	Autism
291516108	Alistipes shahii WAL 8301	1.15.1.1	Superoxide dismutase.	2 superoxide + 2 H(+) = O(2) + H(2)O(2).	Control
115252745	Peptoclostridium difficile 630	1.15.1.1	Superoxide dismutase.	2 superoxide + 2 H(+) = O(2) + H(2)O(2).	Autism
291516108	Alistipes shahii WAL 8301	2.7.7.49	RNA-directed DNA polymerase.	Deoxynucleoside triphosphate + DNA(n) = diphosphate + DNA(n+1).	Control
219869941	Desulfovibrio desulfuricans ATCC 27774	2.7.7.49	RNA-directed DNA polymerase.	Deoxynucleoside triphosphate + DNA(n) = diphosphate + DNA(n+1).	Autism
291516108	Alistipes shahii WAL 8301	2.7.7.49	RNA-directed DNA polymerase.	Deoxynucleoside triphosphate + DNA(n) = diphosphate + DNA(n+1).	Control
115252745	Peptoclostridium difficile 630	2.7.7.49	RNA-directed DNA polymerase.	Deoxynucleoside triphosphate + DNA(n) = diphosphate + DNA(n+1).	Autism
291516108	Alistipes shahii WAL 8301	3.4.13.18	Cytosol nonspecific dipeptidase.	Hydrolysis of dipeptides, preferentially hydrophobic dipeptides includingprolyl amino acids.	Control
115252745	Peptoclostridium difficile 630	3.4.13.18	Cytosol nonspecific dipeptidase.	Hydrolysis of dipeptides, preferentially hydrophobic dipeptides includingprolyl amino acids.	Autism
291516108	Alistipes shahii WAL 8301	1.11.1.6	Catalase.	2 H(2)O(2) = O(2) + 2 H(2)O.	Control
187426706	Akkermansia muciniphila ATCC BAA-835	1.11.1.6	Catalase.	2 H(2)O(2) = O(2) + 2 H(2)O.	Autism
291516108	Alistipes shahii WAL 8301	1.11.1.6	Catalase.	2 H(2)O(2) = O(2) + 2 H(2)O.	Control
219869941	Desulfovibrio desulfuricans ATCC 27774	1.11.1.6	Catalase.	2 H(2)O(2) = O(2) + 2 H(2)O.	Autism
291516108	Alistipes shahii WAL 8301	1.11.1.6	Catalase.	2 H(2)O(2) = O(2) + 2 H(2)O.	Control
115252745	Peptoclostridium difficile 630	1.11.1.6	Catalase.	2 H(2)O(2) = O(2) + 2 H(2)O.	Autism
291516108	Alistipes shahii WAL 8301	3.6.1.13	ADP-ribose diphosphatase.	ADP-D-ribose + H(2)O = AMP + D-ribose 5-phosphate.	Control
115252745	Peptoclostridium difficile 630	3.6.1.13	ADP-ribose diphosphatase.	ADP-D-ribose + H(2)O = AMP + D-ribose 5-phosphate.	Autism
291516108	Alistipes shahii WAL 8301	1.3.1.12	Prephenate dehydrogenase.	Prephenate + NAD(+) = 4-hydroxyphenylpyruvate + CO(2) + NADH.	Control
187426706	Akkermansia muciniphila ATCC BAA-835	1.3.1.12	Prephenate dehydrogenase.	Prephenate + NAD(+) = 4-hydroxyphenylpyruvate + CO(2) + NADH.	Autism
291516108	Alistipes shahii WAL 8301	1.3.1.12	Prephenate dehydrogenase.	Prephenate + NAD(+) = 4-hydroxyphenylpyruvate + CO(2) + NADH.	Control
115252745	Peptoclostridium difficile 630	1.3.1.12	Prephenate dehydrogenase.	Prephenate + NAD(+) = 4-hydroxyphenylpyruvate + CO(2) + NADH.	Autism
291516108	Alistipes shahii WAL 8301	6.1.1.14	Glycine--tRNA ligase.	ATP + glycine + tRNA(Gly) = AMP + diphosphate + glycyl-tRNA(Gly).	Control
110676061	Clostridium perfringens ATCC 13124	6.1.1.14	Glycine--tRNA ligase.	ATP + glycine + tRNA(Gly) = AMP + diphosphate + glycyl-tRNA(Gly).	Autism
291516108	Alistipes shahii WAL 8301	6.1.1.14	Glycine--tRNA ligase.	ATP + glycine + tRNA(Gly) = AMP + diphosphate + glycyl-tRNA(Gly).	Control
219869941	Desulfovibrio desulfuricans ATCC 27774	6.1.1.14	Glycine--tRNA ligase.	ATP + glycine + tRNA(Gly) = AMP + diphosphate + glycyl-tRNA(Gly).	Autism
291516108	Alistipes shahii WAL 8301	6.1.1.14	Glycine--tRNA ligase.	ATP + glycine + tRNA(Gly) = AMP + diphosphate + glycyl-tRNA(Gly).	Control
219869941	Desulfovibrio desulfuricans ATCC 27774	6.1.1.14	Glycine--tRNA ligase.	ATP + glycine + tRNA(Gly) = AMP + diphosphate + glycyl-tRNA(Gly).	Autism
291516108	Alistipes shahii WAL 8301	6.1.1.14	Glycine--tRNA ligase.	ATP + glycine + tRNA(Gly) = AMP + diphosphate + glycyl-tRNA(Gly).	Control
115252745	Peptoclostridium difficile 630	6.1.1.14	Glycine--tRNA ligase.	ATP + glycine + tRNA(Gly) = AMP + diphosphate + glycyl-tRNA(Gly).	Autism
291516108	Alistipes shahii WAL 8301	6.1.1.14	Glycine--tRNA ligase.	ATP + glycine + tRNA(Gly) = AMP + diphosphate + glycyl-tRNA(Gly).	Control
115252745	Peptoclostridium difficile 630	6.1.1.14	Glycine--tRNA ligase.	ATP + glycine + tRNA(Gly) = AMP + diphosphate + glycyl-tRNA(Gly).	Autism
291516108	Alistipes shahii WAL 8301	3.5.1.88	Peptide deformylase.	Formyl-L-methionyl peptide + H(2)O = formate + methionyl peptide.	Control
187426706	Akkermansia muciniphila ATCC BAA-835	3.5.1.88	Peptide deformylase.	Formyl-L-methionyl peptide + H(2)O = formate + methionyl peptide.	Autism
291516108	Alistipes shahii WAL 8301	3.5.1.88	Peptide deformylase.	Formyl-L-methionyl peptide + H(2)O = formate + methionyl peptide.	Control
110676061	Clostridium perfringens ATCC 13124	3.5.1.88	Peptide deformylase.	Formyl-L-methionyl peptide + H(2)O = formate + methionyl peptide.	Autism
291516108	Alistipes shahii WAL 8301	3.5.1.88	Peptide deformylase.	Formyl-L-methionyl peptide + H(2)O = formate + methionyl peptide.	Control
110676061	Clostridium perfringens ATCC 13124	3.5.1.88	Peptide deformylase.	Formyl-L-methionyl peptide + H(2)O = formate + methionyl peptide.	Autism
291516108	Alistipes shahii WAL 8301	3.5.1.88	Peptide deformylase.	Formyl-L-methionyl peptide + H(2)O = formate + methionyl peptide.	Control
110676061	Clostridium perfringens ATCC 13124	3.5.1.88	Peptide deformylase.	Formyl-L-methionyl peptide + H(2)O = formate + methionyl peptide.	Autism
291516108	Alistipes shahii WAL 8301	3.5.1.88	Peptide deformylase.	Formyl-L-methionyl peptide + H(2)O = formate + methionyl peptide.	Control
219869941	Desulfovibrio desulfuricans ATCC 27774	3.5.1.88	Peptide deformylase.	Formyl-L-methionyl peptide + H(2)O = formate + methionyl peptide.	Autism
291516108	Alistipes shahii WAL 8301	3.5.1.88	Peptide deformylase.	Formyl-L-methionyl peptide + H(2)O = formate + methionyl peptide.	Control
115252745	Peptoclostridium difficile 630	3.5.1.88	Peptide deformylase.	Formyl-L-methionyl peptide + H(2)O = formate + methionyl peptide.	Autism
291516108	Alistipes shahii WAL 8301	3.5.1.88	Peptide deformylase.	Formyl-L-methionyl peptide + H(2)O = formate + methionyl peptide.	Control
115252745	Peptoclostridium difficile 630	3.5.1.88	Peptide deformylase.	Formyl-L-methionyl peptide + H(2)O = formate + methionyl peptide.	Autism
291516108	Alistipes shahii WAL 8301	2.7.9.1	Pyruvate, phosphate dikinase.	ATP + pyruvate + phosphate = AMP + phosphoenolpyruvate + diphosphate.	Control
187426706	Akkermansia muciniphila ATCC BAA-835	2.7.9.1	Pyruvate, phosphate dikinase.	ATP + pyruvate + phosphate = AMP + phosphoenolpyruvate + diphosphate.	Autism
291516108	Alistipes shahii WAL 8301	2.7.9.1	Pyruvate, phosphate dikinase.	ATP + pyruvate + phosphate = AMP + phosphoenolpyruvate + diphosphate.	Control
110676061	Clostridium perfringens ATCC 13124	2.7.9.1	Pyruvate, phosphate dikinase.	ATP + pyruvate + phosphate = AMP + phosphoenolpyruvate + diphosphate.	Autism
291516108	Alistipes shahii WAL 8301	2.7.9.1	Pyruvate, phosphate dikinase.	ATP + pyruvate + phosphate = AMP + phosphoenolpyruvate + diphosphate.	Control
115252745	Peptoclostridium difficile 630	2.7.9.1	Pyruvate, phosphate dikinase.	ATP + pyruvate + phosphate = AMP + phosphoenolpyruvate + diphosphate.	Autism
291516108	Alistipes shahii WAL 8301	2.1.1.61	tRNA (5-methylaminomethyl-2-thiouridylate)-methyltransferase.	S-adenosyl-L-methionine + tRNA containing 5-aminomethyl-2-thiouridine =S-adenosyl-L-homocysteine + tRNA containing 5-methylaminomethyl-2-thiouridylate.	Control
187426706	Akkermansia muciniphila ATCC BAA-835	2.1.1.61	tRNA (5-methylaminomethyl-2-thiouridylate)-methyltransferase.	S-adenosyl-L-methionine + tRNA containing 5-aminomethyl-2-thiouridine =S-adenosyl-L-homocysteine + tRNA containing 5-methylaminomethyl-2-thiouridylate.	Autism
291516108	Alistipes shahii WAL 8301	2.1.1.61	tRNA (5-methylaminomethyl-2-thiouridylate)-methyltransferase.	S-adenosyl-L-methionine + tRNA containing 5-aminomethyl-2-thiouridine =S-adenosyl-L-homocysteine + tRNA containing 5-methylaminomethyl-2-thiouridylate.	Control
110676061	Clostridium perfringens ATCC 13124	2.1.1.61	tRNA (5-methylaminomethyl-2-thiouridylate)-methyltransferase.	S-adenosyl-L-methionine + tRNA containing 5-aminomethyl-2-thiouridine =S-adenosyl-L-homocysteine + tRNA containing 5-methylaminomethyl-2-thiouridylate.	Autism
291516108	Alistipes shahii WAL 8301	2.1.1.61	tRNA (5-methylaminomethyl-2-thiouridylate)-methyltransferase.	S-adenosyl-L-methionine + tRNA containing 5-aminomethyl-2-thiouridine =S-adenosyl-L-homocysteine + tRNA containing 5-methylaminomethyl-2-thiouridylate.	Control
219869941	Desulfovibrio desulfuricans ATCC 27774	2.1.1.61	tRNA (5-methylaminomethyl-2-thiouridylate)-methyltransferase.	S-adenosyl-L-methionine + tRNA containing 5-aminomethyl-2-thiouridine =S-adenosyl-L-homocysteine + tRNA containing 5-methylaminomethyl-2-thiouridylate.	Autism
291516108	Alistipes shahii WAL 8301	4.2.3.5	Chorismate synthase.	5-O-(1-carboxyvinyl)-3-phosphoshikimate = chorismate + phosphate.	Control
187426706	Akkermansia muciniphila ATCC BAA-835	4.2.3.5	Chorismate synthase.	5-O-(1-carboxyvinyl)-3-phosphoshikimate = chorismate + phosphate.	Autism
291516108	Alistipes shahii WAL 8301	4.2.3.5	Chorismate synthase.	5-O-(1-carboxyvinyl)-3-phosphoshikimate = chorismate + phosphate.	Control
110676061	Clostridium perfringens ATCC 13124	4.2.3.5	Chorismate synthase.	5-O-(1-carboxyvinyl)-3-phosphoshikimate = chorismate + phosphate.	Autism
291516108	Alistipes shahii WAL 8301	4.2.3.5	Chorismate synthase.	5-O-(1-carboxyvinyl)-3-phosphoshikimate = chorismate + phosphate.	Control
219869941	Desulfovibrio desulfuricans ATCC 27774	4.2.3.5	Chorismate synthase.	5-O-(1-carboxyvinyl)-3-phosphoshikimate = chorismate + phosphate.	Autism
291516108	Alistipes shahii WAL 8301	4.2.3.5	Chorismate synthase.	5-O-(1-carboxyvinyl)-3-phosphoshikimate = chorismate + phosphate.	Control
115252745	Peptoclostridium difficile 630	4.2.3.5	Chorismate synthase.	5-O-(1-carboxyvinyl)-3-phosphoshikimate = chorismate + phosphate.	Autism
291516108	Alistipes shahii WAL 8301	2.5.1.19	3-phosphoshikimate 1-carboxyvinyltransferase.	Phosphoenolpyruvate + 3-phosphoshikimate = phosphate + 5-O-(1-carboxyvinyl)-3-phosphoshikimate.	Control
187426706	Akkermansia muciniphila ATCC BAA-835	2.5.1.19	3-phosphoshikimate 1-carboxyvinyltransferase.	Phosphoenolpyruvate + 3-phosphoshikimate = phosphate + 5-O-(1-carboxyvinyl)-3-phosphoshikimate.	Autism
291516108	Alistipes shahii WAL 8301	2.5.1.19	3-phosphoshikimate 1-carboxyvinyltransferase.	Phosphoenolpyruvate + 3-phosphoshikimate = phosphate + 5-O-(1-carboxyvinyl)-3-phosphoshikimate.	Control
110676061	Clostridium perfringens ATCC 13124	2.5.1.19	3-phosphoshikimate 1-carboxyvinyltransferase.	Phosphoenolpyruvate + 3-phosphoshikimate = phosphate + 5-O-(1-carboxyvinyl)-3-phosphoshikimate.	Autism
291516108	Alistipes shahii WAL 8301	2.5.1.19	3-phosphoshikimate 1-carboxyvinyltransferase.	Phosphoenolpyruvate + 3-phosphoshikimate = phosphate + 5-O-(1-carboxyvinyl)-3-phosphoshikimate.	Control
219869941	Desulfovibrio desulfuricans ATCC 27774	2.5.1.19	3-phosphoshikimate 1-carboxyvinyltransferase.	Phosphoenolpyruvate + 3-phosphoshikimate = phosphate + 5-O-(1-carboxyvinyl)-3-phosphoshikimate.	Autism
291516108	Alistipes shahii WAL 8301	2.5.1.19	3-phosphoshikimate 1-carboxyvinyltransferase.	Phosphoenolpyruvate + 3-phosphoshikimate = phosphate + 5-O-(1-carboxyvinyl)-3-phosphoshikimate.	Control
115252745	Peptoclostridium difficile 630	2.5.1.19	3-phosphoshikimate 1-carboxyvinyltransferase.	Phosphoenolpyruvate + 3-phosphoshikimate = phosphate + 5-O-(1-carboxyvinyl)-3-phosphoshikimate.	Autism
291516108	Alistipes shahii WAL 8301	6.3.5.1	NAD(+) synthase (glutamine-hydrolyzing).	ATP + deamido-NAD(+) + L-glutamine + H(2)O = AMP + diphosphate + NAD(+) +L-glutamate.	Control
219869941	Desulfovibrio desulfuricans ATCC 27774	6.3.5.1	NAD(+) synthase (glutamine-hydrolyzing).	ATP + deamido-NAD(+) + L-glutamine + H(2)O = AMP + diphosphate + NAD(+) +L-glutamate.	Autism
291516108	Alistipes shahii WAL 8301	3.2.1.52	Beta-N-acetylhexosaminidase.	Hydrolysis of terminal non-reducing N-acetyl-D-hexosamine residues inN-acetyl-beta-D-hexosaminides.	Control
187426706	Akkermansia muciniphila ATCC BAA-835	3.2.1.52	Beta-N-acetylhexosaminidase.	Hydrolysis of terminal non-reducing N-acetyl-D-hexosamine residues inN-acetyl-beta-D-hexosaminides.	Autism
291516108	Alistipes shahii WAL 8301	3.2.1.52	Beta-N-acetylhexosaminidase.	Hydrolysis of terminal non-reducing N-acetyl-D-hexosamine residues inN-acetyl-beta-D-hexosaminides.	Control
187426706	Akkermansia muciniphila ATCC BAA-835	3.2.1.52	Beta-N-acetylhexosaminidase.	Hydrolysis of terminal non-reducing N-acetyl-D-hexosamine residues inN-acetyl-beta-D-hexosaminides.	Autism
291516108	Alistipes shahii WAL 8301	3.2.1.52	Beta-N-acetylhexosaminidase.	Hydrolysis of terminal non-reducing N-acetyl-D-hexosamine residues inN-acetyl-beta-D-hexosaminides.	Control
187426706	Akkermansia muciniphila ATCC BAA-835	3.2.1.52	Beta-N-acetylhexosaminidase.	Hydrolysis of terminal non-reducing N-acetyl-D-hexosamine residues inN-acetyl-beta-D-hexosaminides.	Autism
291516108	Alistipes shahii WAL 8301	3.2.1.52	Beta-N-acetylhexosaminidase.	Hydrolysis of terminal non-reducing N-acetyl-D-hexosamine residues inN-acetyl-beta-D-hexosaminides.	Control
187426706	Akkermansia muciniphila ATCC BAA-835	3.2.1.52	Beta-N-acetylhexosaminidase.	Hydrolysis of terminal non-reducing N-acetyl-D-hexosamine residues inN-acetyl-beta-D-hexosaminides.	Autism
291516108	Alistipes shahii WAL 8301	3.2.1.52	Beta-N-acetylhexosaminidase.	Hydrolysis of terminal non-reducing N-acetyl-D-hexosamine residues inN-acetyl-beta-D-hexosaminides.	Control
187426706	Akkermansia muciniphila ATCC BAA-835	3.2.1.52	Beta-N-acetylhexosaminidase.	Hydrolysis of terminal non-reducing N-acetyl-D-hexosamine residues inN-acetyl-beta-D-hexosaminides.	Autism
291516108	Alistipes shahii WAL 8301	3.2.1.52	Beta-N-acetylhexosaminidase.	Hydrolysis of terminal non-reducing N-acetyl-D-hexosamine residues inN-acetyl-beta-D-hexosaminides.	Control
187426706	Akkermansia muciniphila ATCC BAA-835	3.2.1.52	Beta-N-acetylhexosaminidase.	Hydrolysis of terminal non-reducing N-acetyl-D-hexosamine residues inN-acetyl-beta-D-hexosaminides.	Autism
291516108	Alistipes shahii WAL 8301	3.2.1.52	Beta-N-acetylhexosaminidase.	Hydrolysis of terminal non-reducing N-acetyl-D-hexosamine residues inN-acetyl-beta-D-hexosaminides.	Control
187426706	Akkermansia muciniphila ATCC BAA-835	3.2.1.52	Beta-N-acetylhexosaminidase.	Hydrolysis of terminal non-reducing N-acetyl-D-hexosamine residues inN-acetyl-beta-D-hexosaminides.	Autism
291516108	Alistipes shahii WAL 8301	3.2.1.52	Beta-N-acetylhexosaminidase.	Hydrolysis of terminal non-reducing N-acetyl-D-hexosamine residues inN-acetyl-beta-D-hexosaminides.	Control
187426706	Akkermansia muciniphila ATCC BAA-835	3.2.1.52	Beta-N-acetylhexosaminidase.	Hydrolysis of terminal non-reducing N-acetyl-D-hexosamine residues inN-acetyl-beta-D-hexosaminides.	Autism
291516108	Alistipes shahii WAL 8301	3.2.1.52	Beta-N-acetylhexosaminidase.	Hydrolysis of terminal non-reducing N-acetyl-D-hexosamine residues inN-acetyl-beta-D-hexosaminides.	Control
187426706	Akkermansia muciniphila ATCC BAA-835	3.2.1.52	Beta-N-acetylhexosaminidase.	Hydrolysis of terminal non-reducing N-acetyl-D-hexosamine residues inN-acetyl-beta-D-hexosaminides.	Autism
291516108	Alistipes shahii WAL 8301	3.2.1.52	Beta-N-acetylhexosaminidase.	Hydrolysis of terminal non-reducing N-acetyl-D-hexosamine residues inN-acetyl-beta-D-hexosaminides.	Control
187426706	Akkermansia muciniphila ATCC BAA-835	3.2.1.52	Beta-N-acetylhexosaminidase.	Hydrolysis of terminal non-reducing N-acetyl-D-hexosamine residues inN-acetyl-beta-D-hexosaminides.	Autism
291516108	Alistipes shahii WAL 8301	3.2.1.52	Beta-N-acetylhexosaminidase.	Hydrolysis of terminal non-reducing N-acetyl-D-hexosamine residues inN-acetyl-beta-D-hexosaminides.	Control
187426706	Akkermansia muciniphila ATCC BAA-835	3.2.1.52	Beta-N-acetylhexosaminidase.	Hydrolysis of terminal non-reducing N-acetyl-D-hexosamine residues inN-acetyl-beta-D-hexosaminides.	Autism
291516108	Alistipes shahii WAL 8301	3.2.1.52	Beta-N-acetylhexosaminidase.	Hydrolysis of terminal non-reducing N-acetyl-D-hexosamine residues inN-acetyl-beta-D-hexosaminides.	Control
110676061	Clostridium perfringens ATCC 13124	3.2.1.52	Beta-N-acetylhexosaminidase.	Hydrolysis of terminal non-reducing N-acetyl-D-hexosamine residues inN-acetyl-beta-D-hexosaminides.	Autism
291516108	Alistipes shahii WAL 8301	3.2.1.52	Beta-N-acetylhexosaminidase.	Hydrolysis of terminal non-reducing N-acetyl-D-hexosamine residues inN-acetyl-beta-D-hexosaminides.	Control
187426706	Akkermansia muciniphila ATCC BAA-835	3.2.1.52	Beta-N-acetylhexosaminidase.	Hydrolysis of terminal non-reducing N-acetyl-D-hexosamine residues inN-acetyl-beta-D-hexosaminides.	Autism
291516108	Alistipes shahii WAL 8301	3.2.1.52	Beta-N-acetylhexosaminidase.	Hydrolysis of terminal non-reducing N-acetyl-D-hexosamine residues inN-acetyl-beta-D-hexosaminides.	Control
187426706	Akkermansia muciniphila ATCC BAA-835	3.2.1.52	Beta-N-acetylhexosaminidase.	Hydrolysis of terminal non-reducing N-acetyl-D-hexosamine residues inN-acetyl-beta-D-hexosaminides.	Autism
291516108	Alistipes shahii WAL 8301	3.2.1.52	Beta-N-acetylhexosaminidase.	Hydrolysis of terminal non-reducing N-acetyl-D-hexosamine residues inN-acetyl-beta-D-hexosaminides.	Control
187426706	Akkermansia muciniphila ATCC BAA-835	3.2.1.52	Beta-N-acetylhexosaminidase.	Hydrolysis of terminal non-reducing N-acetyl-D-hexosamine residues inN-acetyl-beta-D-hexosaminides.	Autism
291516108	Alistipes shahii WAL 8301	3.2.1.52	Beta-N-acetylhexosaminidase.	Hydrolysis of terminal non-reducing N-acetyl-D-hexosamine residues inN-acetyl-beta-D-hexosaminides.	Control
187426706	Akkermansia muciniphila ATCC BAA-835	3.2.1.52	Beta-N-acetylhexosaminidase.	Hydrolysis of terminal non-reducing N-acetyl-D-hexosamine residues inN-acetyl-beta-D-hexosaminides.	Autism
291516108	Alistipes shahii WAL 8301	3.2.1.52	Beta-N-acetylhexosaminidase.	Hydrolysis of terminal non-reducing N-acetyl-D-hexosamine residues inN-acetyl-beta-D-hexosaminides.	Control
187426706	Akkermansia muciniphila ATCC BAA-835	3.2.1.52	Beta-N-acetylhexosaminidase.	Hydrolysis of terminal non-reducing N-acetyl-D-hexosamine residues inN-acetyl-beta-D-hexosaminides.	Autism
291516108	Alistipes shahii WAL 8301	3.2.1.52	Beta-N-acetylhexosaminidase.	Hydrolysis of terminal non-reducing N-acetyl-D-hexosamine residues inN-acetyl-beta-D-hexosaminides.	Control
187426706	Akkermansia muciniphila ATCC BAA-835	3.2.1.52	Beta-N-acetylhexosaminidase.	Hydrolysis of terminal non-reducing N-acetyl-D-hexosamine residues inN-acetyl-beta-D-hexosaminides.	Autism
291516108	Alistipes shahii WAL 8301	3.2.1.52	Beta-N-acetylhexosaminidase.	Hydrolysis of terminal non-reducing N-acetyl-D-hexosamine residues inN-acetyl-beta-D-hexosaminides.	Control
187426706	Akkermansia muciniphila ATCC BAA-835	3.2.1.52	Beta-N-acetylhexosaminidase.	Hydrolysis of terminal non-reducing N-acetyl-D-hexosamine residues inN-acetyl-beta-D-hexosaminides.	Autism
291516108	Alistipes shahii WAL 8301	3.2.1.52	Beta-N-acetylhexosaminidase.	Hydrolysis of terminal non-reducing N-acetyl-D-hexosamine residues inN-acetyl-beta-D-hexosaminides.	Control
187426706	Akkermansia muciniphila ATCC BAA-835	3.2.1.52	Beta-N-acetylhexosaminidase.	Hydrolysis of terminal non-reducing N-acetyl-D-hexosamine residues inN-acetyl-beta-D-hexosaminides.	Autism
291516108	Alistipes shahii WAL 8301	3.2.1.52	Beta-N-acetylhexosaminidase.	Hydrolysis of terminal non-reducing N-acetyl-D-hexosamine residues inN-acetyl-beta-D-hexosaminides.	Control
187426706	Akkermansia muciniphila ATCC BAA-835	3.2.1.52	Beta-N-acetylhexosaminidase.	Hydrolysis of terminal non-reducing N-acetyl-D-hexosamine residues inN-acetyl-beta-D-hexosaminides.	Autism
291516108	Alistipes shahii WAL 8301	3.2.1.52	Beta-N-acetylhexosaminidase.	Hydrolysis of terminal non-reducing N-acetyl-D-hexosamine residues inN-acetyl-beta-D-hexosaminides.	Control
187426706	Akkermansia muciniphila ATCC BAA-835	3.2.1.52	Beta-N-acetylhexosaminidase.	Hydrolysis of terminal non-reducing N-acetyl-D-hexosamine residues inN-acetyl-beta-D-hexosaminides.	Autism
291516108	Alistipes shahii WAL 8301	3.2.1.52	Beta-N-acetylhexosaminidase.	Hydrolysis of terminal non-reducing N-acetyl-D-hexosamine residues inN-acetyl-beta-D-hexosaminides.	Control
187426706	Akkermansia muciniphila ATCC BAA-835	3.2.1.52	Beta-N-acetylhexosaminidase.	Hydrolysis of terminal non-reducing N-acetyl-D-hexosamine residues inN-acetyl-beta-D-hexosaminides.	Autism
291516108	Alistipes shahii WAL 8301	3.2.1.52	Beta-N-acetylhexosaminidase.	Hydrolysis of terminal non-reducing N-acetyl-D-hexosamine residues inN-acetyl-beta-D-hexosaminides.	Control
110676061	Clostridium perfringens ATCC 13124	3.2.1.52	Beta-N-acetylhexosaminidase.	Hydrolysis of terminal non-reducing N-acetyl-D-hexosamine residues inN-acetyl-beta-D-hexosaminides.	Autism
291516108	Alistipes shahii WAL 8301	3.2.1.20	Alpha-glucosidase.	Hydrolysis of terminal, non-reducing (1->4)-linked alpha-D-glucoseresidues with release of alpha-D-glucose.	Control
187426706	Akkermansia muciniphila ATCC BAA-835	3.2.1.20	Alpha-glucosidase.	Hydrolysis of terminal, non-reducing (1->4)-linked alpha-D-glucoseresidues with release of alpha-D-glucose.	Autism
291516108	Alistipes shahii WAL 8301	3.2.1.20	Alpha-glucosidase.	Hydrolysis of terminal, non-reducing (1->4)-linked alpha-D-glucoseresidues with release of alpha-D-glucose.	Control
110676061	Clostridium perfringens ATCC 13124	3.2.1.20	Alpha-glucosidase.	Hydrolysis of terminal, non-reducing (1->4)-linked alpha-D-glucoseresidues with release of alpha-D-glucose.	Autism
291516108	Alistipes shahii WAL 8301	3.2.1.52	Beta-N-acetylhexosaminidase.	Hydrolysis of terminal non-reducing N-acetyl-D-hexosamine residues inN-acetyl-beta-D-hexosaminides.	Control
187426706	Akkermansia muciniphila ATCC BAA-835	3.2.1.52	Beta-N-acetylhexosaminidase.	Hydrolysis of terminal non-reducing N-acetyl-D-hexosamine residues inN-acetyl-beta-D-hexosaminides.	Autism
291516108	Alistipes shahii WAL 8301	3.2.1.52	Beta-N-acetylhexosaminidase.	Hydrolysis of terminal non-reducing N-acetyl-D-hexosamine residues inN-acetyl-beta-D-hexosaminides.	Control
187426706	Akkermansia muciniphila ATCC BAA-835	3.2.1.52	Beta-N-acetylhexosaminidase.	Hydrolysis of terminal non-reducing N-acetyl-D-hexosamine residues inN-acetyl-beta-D-hexosaminides.	Autism
291516108	Alistipes shahii WAL 8301	3.2.1.52	Beta-N-acetylhexosaminidase.	Hydrolysis of terminal non-reducing N-acetyl-D-hexosamine residues inN-acetyl-beta-D-hexosaminides.	Control
187426706	Akkermansia muciniphila ATCC BAA-835	3.2.1.52	Beta-N-acetylhexosaminidase.	Hydrolysis of terminal non-reducing N-acetyl-D-hexosamine residues inN-acetyl-beta-D-hexosaminides.	Autism
291516108	Alistipes shahii WAL 8301	3.2.1.52	Beta-N-acetylhexosaminidase.	Hydrolysis of terminal non-reducing N-acetyl-D-hexosamine residues inN-acetyl-beta-D-hexosaminides.	Control
187426706	Akkermansia muciniphila ATCC BAA-835	3.2.1.52	Beta-N-acetylhexosaminidase.	Hydrolysis of terminal non-reducing N-acetyl-D-hexosamine residues inN-acetyl-beta-D-hexosaminides.	Autism
291516108	Alistipes shahii WAL 8301	3.2.1.52	Beta-N-acetylhexosaminidase.	Hydrolysis of terminal non-reducing N-acetyl-D-hexosamine residues inN-acetyl-beta-D-hexosaminides.	Control
187426706	Akkermansia muciniphila ATCC BAA-835	3.2.1.52	Beta-N-acetylhexosaminidase.	Hydrolysis of terminal non-reducing N-acetyl-D-hexosamine residues inN-acetyl-beta-D-hexosaminides.	Autism
291516108	Alistipes shahii WAL 8301	3.2.1.52	Beta-N-acetylhexosaminidase.	Hydrolysis of terminal non-reducing N-acetyl-D-hexosamine residues inN-acetyl-beta-D-hexosaminides.	Control
187426706	Akkermansia muciniphila ATCC BAA-835	3.2.1.52	Beta-N-acetylhexosaminidase.	Hydrolysis of terminal non-reducing N-acetyl-D-hexosamine residues inN-acetyl-beta-D-hexosaminides.	Autism
291516108	Alistipes shahii WAL 8301	3.2.1.52	Beta-N-acetylhexosaminidase.	Hydrolysis of terminal non-reducing N-acetyl-D-hexosamine residues inN-acetyl-beta-D-hexosaminides.	Control
187426706	Akkermansia muciniphila ATCC BAA-835	3.2.1.52	Beta-N-acetylhexosaminidase.	Hydrolysis of terminal non-reducing N-acetyl-D-hexosamine residues inN-acetyl-beta-D-hexosaminides.	Autism
291516108	Alistipes shahii WAL 8301	3.2.1.52	Beta-N-acetylhexosaminidase.	Hydrolysis of terminal non-reducing N-acetyl-D-hexosamine residues inN-acetyl-beta-D-hexosaminides.	Control
187426706	Akkermansia muciniphila ATCC BAA-835	3.2.1.52	Beta-N-acetylhexosaminidase.	Hydrolysis of terminal non-reducing N-acetyl-D-hexosamine residues inN-acetyl-beta-D-hexosaminides.	Autism
291516108	Alistipes shahii WAL 8301	3.2.1.52	Beta-N-acetylhexosaminidase.	Hydrolysis of terminal non-reducing N-acetyl-D-hexosamine residues inN-acetyl-beta-D-hexosaminides.	Control
187426706	Akkermansia muciniphila ATCC BAA-835	3.2.1.52	Beta-N-acetylhexosaminidase.	Hydrolysis of terminal non-reducing N-acetyl-D-hexosamine residues inN-acetyl-beta-D-hexosaminides.	Autism
291516108	Alistipes shahii WAL 8301	3.2.1.52	Beta-N-acetylhexosaminidase.	Hydrolysis of terminal non-reducing N-acetyl-D-hexosamine residues inN-acetyl-beta-D-hexosaminides.	Control
187426706	Akkermansia muciniphila ATCC BAA-835	3.2.1.52	Beta-N-acetylhexosaminidase.	Hydrolysis of terminal non-reducing N-acetyl-D-hexosamine residues inN-acetyl-beta-D-hexosaminides.	Autism
291516108	Alistipes shahii WAL 8301	3.2.1.52	Beta-N-acetylhexosaminidase.	Hydrolysis of terminal non-reducing N-acetyl-D-hexosamine residues inN-acetyl-beta-D-hexosaminides.	Control
187426706	Akkermansia muciniphila ATCC BAA-835	3.2.1.52	Beta-N-acetylhexosaminidase.	Hydrolysis of terminal non-reducing N-acetyl-D-hexosamine residues inN-acetyl-beta-D-hexosaminides.	Autism
291516108	Alistipes shahii WAL 8301	3.2.1.52	Beta-N-acetylhexosaminidase.	Hydrolysis of terminal non-reducing N-acetyl-D-hexosamine residues inN-acetyl-beta-D-hexosaminides.	Control
110676061	Clostridium perfringens ATCC 13124	3.2.1.52	Beta-N-acetylhexosaminidase.	Hydrolysis of terminal non-reducing N-acetyl-D-hexosamine residues inN-acetyl-beta-D-hexosaminides.	Autism
291516108	Alistipes shahii WAL 8301	2.4.2.8	Hypoxanthine phosphoribosyltransferase.	IMP + diphosphate = hypoxanthine + 5-phospho-alpha-D-ribose1-diphosphate.	Control
110676061	Clostridium perfringens ATCC 13124	2.4.2.8	Hypoxanthine phosphoribosyltransferase.	IMP + diphosphate = hypoxanthine + 5-phospho-alpha-D-ribose1-diphosphate.	Autism
291516108	Alistipes shahii WAL 8301	2.4.2.8	Hypoxanthine phosphoribosyltransferase.	IMP + diphosphate = hypoxanthine + 5-phospho-alpha-D-ribose1-diphosphate.	Control
110676061	Clostridium perfringens ATCC 13124	2.4.2.8	Hypoxanthine phosphoribosyltransferase.	IMP + diphosphate = hypoxanthine + 5-phospho-alpha-D-ribose1-diphosphate.	Autism
291516108	Alistipes shahii WAL 8301	2.4.2.8	Hypoxanthine phosphoribosyltransferase.	IMP + diphosphate = hypoxanthine + 5-phospho-alpha-D-ribose1-diphosphate.	Control
219869941	Desulfovibrio desulfuricans ATCC 27774	2.4.2.8	Hypoxanthine phosphoribosyltransferase.	IMP + diphosphate = hypoxanthine + 5-phospho-alpha-D-ribose1-diphosphate.	Autism
291516108	Alistipes shahii WAL 8301	2.4.2.8	Hypoxanthine phosphoribosyltransferase.	IMP + diphosphate = hypoxanthine + 5-phospho-alpha-D-ribose1-diphosphate.	Control
115252745	Peptoclostridium difficile 630	2.4.2.8	Hypoxanthine phosphoribosyltransferase.	IMP + diphosphate = hypoxanthine + 5-phospho-alpha-D-ribose1-diphosphate.	Autism
291516108	Alistipes shahii WAL 8301	2.4.2.8	Hypoxanthine phosphoribosyltransferase.	IMP + diphosphate = hypoxanthine + 5-phospho-alpha-D-ribose1-diphosphate.	Control
115252745	Peptoclostridium difficile 630	2.4.2.8	Hypoxanthine phosphoribosyltransferase.	IMP + diphosphate = hypoxanthine + 5-phospho-alpha-D-ribose1-diphosphate.	Autism
291516108	Alistipes shahii WAL 8301	2.7.4.16	Thiamine-phosphate kinase.	ATP + thiamine phosphate = ADP + thiamine diphosphate.	Control
219869941	Desulfovibrio desulfuricans ATCC 27774	2.7.4.16	Thiamine-phosphate kinase.	ATP + thiamine phosphate = ADP + thiamine diphosphate.	Autism
291516108	Alistipes shahii WAL 8301	4.2.1.10	3-dehydroquinate dehydratase.	3-dehydroquinate = 3-dehydroshikimate + H(2)O.	Control
187426706	Akkermansia muciniphila ATCC BAA-835	4.2.1.10	3-dehydroquinate dehydratase.	3-dehydroquinate = 3-dehydroshikimate + H(2)O.	Autism
291516108	Alistipes shahii WAL 8301	4.2.1.10	3-dehydroquinate dehydratase.	3-dehydroquinate = 3-dehydroshikimate + H(2)O.	Control
110676061	Clostridium perfringens ATCC 13124	4.2.1.10	3-dehydroquinate dehydratase.	3-dehydroquinate = 3-dehydroshikimate + H(2)O.	Autism
291516108	Alistipes shahii WAL 8301	4.2.1.10	3-dehydroquinate dehydratase.	3-dehydroquinate = 3-dehydroshikimate + H(2)O.	Control
219869941	Desulfovibrio desulfuricans ATCC 27774	4.2.1.10	3-dehydroquinate dehydratase.	3-dehydroquinate = 3-dehydroshikimate + H(2)O.	Autism
291516108	Alistipes shahii WAL 8301	4.2.1.10	3-dehydroquinate dehydratase.	3-dehydroquinate = 3-dehydroshikimate + H(2)O.	Control
115252745	Peptoclostridium difficile 630	4.2.1.10	3-dehydroquinate dehydratase.	3-dehydroquinate = 3-dehydroshikimate + H(2)O.	Autism
291516108	Alistipes shahii WAL 8301	2.7.1.40	Pyruvate kinase.	ATP + pyruvate = ADP + phosphoenolpyruvate.	Control
187426706	Akkermansia muciniphila ATCC BAA-835	2.7.1.40	Pyruvate kinase.	ATP + pyruvate = ADP + phosphoenolpyruvate.	Autism
291516108	Alistipes shahii WAL 8301	2.7.1.40	Pyruvate kinase.	ATP + pyruvate = ADP + phosphoenolpyruvate.	Control
110676061	Clostridium perfringens ATCC 13124	2.7.1.40	Pyruvate kinase.	ATP + pyruvate = ADP + phosphoenolpyruvate.	Autism
291516108	Alistipes shahii WAL 8301	2.7.1.40	Pyruvate kinase.	ATP + pyruvate = ADP + phosphoenolpyruvate.	Control
110676061	Clostridium perfringens ATCC 13124	2.7.1.40	Pyruvate kinase.	ATP + pyruvate = ADP + phosphoenolpyruvate.	Autism
291516108	Alistipes shahii WAL 8301	2.7.1.40	Pyruvate kinase.	ATP + pyruvate = ADP + phosphoenolpyruvate.	Control
219869941	Desulfovibrio desulfuricans ATCC 27774	2.7.1.40	Pyruvate kinase.	ATP + pyruvate = ADP + phosphoenolpyruvate.	Autism
291516108	Alistipes shahii WAL 8301	2.7.1.40	Pyruvate kinase.	ATP + pyruvate = ADP + phosphoenolpyruvate.	Control
115252745	Peptoclostridium difficile 630	2.7.1.40	Pyruvate kinase.	ATP + pyruvate = ADP + phosphoenolpyruvate.	Autism
291516108	Alistipes shahii WAL 8301	2.7.2.7	Butyrate kinase.	ATP + butanoate = ADP + butanoyl phosphate.	Control
115252745	Peptoclostridium difficile 630	2.7.2.7	Butyrate kinase.	ATP + butanoate = ADP + butanoyl phosphate.	Autism
291516108	Alistipes shahii WAL 8301	2.7.2.7	Butyrate kinase.	ATP + butanoate = ADP + butanoyl phosphate.	Control
115252745	Peptoclostridium difficile 630	2.7.2.7	Butyrate kinase.	ATP + butanoate = ADP + butanoyl phosphate.	Autism
291516108	Alistipes shahii WAL 8301	2.7.2.7	Butyrate kinase.	ATP + butanoate = ADP + butanoyl phosphate.	Control
115252745	Peptoclostridium difficile 630	2.7.2.7	Butyrate kinase.	ATP + butanoate = ADP + butanoyl phosphate.	Autism
291516108	Alistipes shahii WAL 8301	2.3.1.19	Phosphate butyryltransferase.	Butanoyl-CoA + phosphate = CoA + butanoylphosphate.	Control
110676061	Clostridium perfringens ATCC 13124	2.3.1.19	Phosphate butyryltransferase.	Butanoyl-CoA + phosphate = CoA + butanoylphosphate.	Autism
291516108	Alistipes shahii WAL 8301	2.3.1.19	Phosphate butyryltransferase.	Butanoyl-CoA + phosphate = CoA + butanoylphosphate.	Control
115252745	Peptoclostridium difficile 630	2.3.1.19	Phosphate butyryltransferase.	Butanoyl-CoA + phosphate = CoA + butanoylphosphate.	Autism
291516108	Alistipes shahii WAL 8301	2.3.1.19	Phosphate butyryltransferase.	Butanoyl-CoA + phosphate = CoA + butanoylphosphate.	Control
115252745	Peptoclostridium difficile 630	2.3.1.19	Phosphate butyryltransferase.	Butanoyl-CoA + phosphate = CoA + butanoylphosphate.	Autism
291516108	Alistipes shahii WAL 8301	2.3.1.19	Phosphate butyryltransferase.	Butanoyl-CoA + phosphate = CoA + butanoylphosphate.	Control
115252745	Peptoclostridium difficile 630	2.3.1.19	Phosphate butyryltransferase.	Butanoyl-CoA + phosphate = CoA + butanoylphosphate.	Autism
291516108	Alistipes shahii WAL 8301	2.7.2.1	Acetate kinase.	ATP + acetate = ADP + acetyl phosphate.	Control
110676061	Clostridium perfringens ATCC 13124	2.7.2.1	Acetate kinase.	ATP + acetate = ADP + acetyl phosphate.	Autism
291516108	Alistipes shahii WAL 8301	2.7.2.1	Acetate kinase.	ATP + acetate = ADP + acetyl phosphate.	Control
110676061	Clostridium perfringens ATCC 13124	2.7.2.1	Acetate kinase.	ATP + acetate = ADP + acetyl phosphate.	Autism
291516108	Alistipes shahii WAL 8301	2.7.2.1	Acetate kinase.	ATP + acetate = ADP + acetyl phosphate.	Control
115252745	Peptoclostridium difficile 630	2.7.2.1	Acetate kinase.	ATP + acetate = ADP + acetyl phosphate.	Autism
291516108	Alistipes shahii WAL 8301	1.2.1.41	Glutamate-5-semialdehyde dehydrogenase.	L-glutamate 5-semialdehyde + phosphate + NADP(+) = L-glutamyl 5-phosphate+ NADPH.	Control
187426706	Akkermansia muciniphila ATCC BAA-835	1.2.1.41	Glutamate-5-semialdehyde dehydrogenase.	L-glutamate 5-semialdehyde + phosphate + NADP(+) = L-glutamyl 5-phosphate+ NADPH.	Autism
291516108	Alistipes shahii WAL 8301	1.2.1.41	Glutamate-5-semialdehyde dehydrogenase.	L-glutamate 5-semialdehyde + phosphate + NADP(+) = L-glutamyl 5-phosphate+ NADPH.	Control
110676061	Clostridium perfringens ATCC 13124	1.2.1.41	Glutamate-5-semialdehyde dehydrogenase.	L-glutamate 5-semialdehyde + phosphate + NADP(+) = L-glutamyl 5-phosphate+ NADPH.	Autism
291516108	Alistipes shahii WAL 8301	1.2.1.41	Glutamate-5-semialdehyde dehydrogenase.	L-glutamate 5-semialdehyde + phosphate + NADP(+) = L-glutamyl 5-phosphate+ NADPH.	Control
219869941	Desulfovibrio desulfuricans ATCC 27774	1.2.1.41	Glutamate-5-semialdehyde dehydrogenase.	L-glutamate 5-semialdehyde + phosphate + NADP(+) = L-glutamyl 5-phosphate+ NADPH.	Autism
291516108	Alistipes shahii WAL 8301	2.7.2.11	Glutamate 5-kinase.	ATP + L-glutamate = ADP + L-glutamate 5-phosphate.	Control
187426706	Akkermansia muciniphila ATCC BAA-835	2.7.2.11	Glutamate 5-kinase.	ATP + L-glutamate = ADP + L-glutamate 5-phosphate.	Autism
291516108	Alistipes shahii WAL 8301	2.7.2.11	Glutamate 5-kinase.	ATP + L-glutamate = ADP + L-glutamate 5-phosphate.	Control
110676061	Clostridium perfringens ATCC 13124	2.7.2.11	Glutamate 5-kinase.	ATP + L-glutamate = ADP + L-glutamate 5-phosphate.	Autism
291516108	Alistipes shahii WAL 8301	2.7.2.11	Glutamate 5-kinase.	ATP + L-glutamate = ADP + L-glutamate 5-phosphate.	Control
219869941	Desulfovibrio desulfuricans ATCC 27774	2.7.2.11	Glutamate 5-kinase.	ATP + L-glutamate = ADP + L-glutamate 5-phosphate.	Autism
291516108	Alistipes shahii WAL 8301	6.3.4.2	CTP synthase (glutamine hydrolyzing).	ATP + UTP + L-glutamine = ADP + phosphate + CTP + L-glutamate.	Control
187426706	Akkermansia muciniphila ATCC BAA-835	6.3.4.2	CTP synthase (glutamine hydrolyzing).	ATP + UTP + L-glutamine = ADP + phosphate + CTP + L-glutamate.	Autism
291516108	Alistipes shahii WAL 8301	6.3.4.2	CTP synthase (glutamine hydrolyzing).	ATP + UTP + L-glutamine = ADP + phosphate + CTP + L-glutamate.	Control
110676061	Clostridium perfringens ATCC 13124	6.3.4.2	CTP synthase (glutamine hydrolyzing).	ATP + UTP + L-glutamine = ADP + phosphate + CTP + L-glutamate.	Autism
291516108	Alistipes shahii WAL 8301	6.3.4.2	CTP synthase (glutamine hydrolyzing).	ATP + UTP + L-glutamine = ADP + phosphate + CTP + L-glutamate.	Control
219869941	Desulfovibrio desulfuricans ATCC 27774	6.3.4.2	CTP synthase (glutamine hydrolyzing).	ATP + UTP + L-glutamine = ADP + phosphate + CTP + L-glutamate.	Autism
291516108	Alistipes shahii WAL 8301	5.1.3.8	N-acylglucosamine 2-epimerase.	N-acyl-D-glucosamine = N-acyl-D-mannosamine.	Control
187426706	Akkermansia muciniphila ATCC BAA-835	5.1.3.8	N-acylglucosamine 2-epimerase.	N-acyl-D-glucosamine = N-acyl-D-mannosamine.	Autism
291516108	Alistipes shahii WAL 8301	6.3.2.17	Tetrahydrofolate synthase.	ATP + tetrahydropteroyl-(gamma-Glu)(n) + L-glutamate = ADP + phosphate +tetrahydropteroyl-(gamma-Glu)(n+1).	Control
187426706	Akkermansia muciniphila ATCC BAA-835	6.3.2.17	Tetrahydrofolate synthase.	ATP + tetrahydropteroyl-(gamma-Glu)(n) + L-glutamate = ADP + phosphate +tetrahydropteroyl-(gamma-Glu)(n+1).	Autism
291516108	Alistipes shahii WAL 8301	6.3.2.17	Tetrahydrofolate synthase.	ATP + tetrahydropteroyl-(gamma-Glu)(n) + L-glutamate = ADP + phosphate +tetrahydropteroyl-(gamma-Glu)(n+1).	Control
110676061	Clostridium perfringens ATCC 13124	6.3.2.17	Tetrahydrofolate synthase.	ATP + tetrahydropteroyl-(gamma-Glu)(n) + L-glutamate = ADP + phosphate +tetrahydropteroyl-(gamma-Glu)(n+1).	Autism
291516108	Alistipes shahii WAL 8301	6.3.2.17	Tetrahydrofolate synthase.	ATP + tetrahydropteroyl-(gamma-Glu)(n) + L-glutamate = ADP + phosphate +tetrahydropteroyl-(gamma-Glu)(n+1).	Control
219869941	Desulfovibrio desulfuricans ATCC 27774	6.3.2.17	Tetrahydrofolate synthase.	ATP + tetrahydropteroyl-(gamma-Glu)(n) + L-glutamate = ADP + phosphate +tetrahydropteroyl-(gamma-Glu)(n+1).	Autism
291516108	Alistipes shahii WAL 8301	6.3.2.17	Tetrahydrofolate synthase.	ATP + tetrahydropteroyl-(gamma-Glu)(n) + L-glutamate = ADP + phosphate +tetrahydropteroyl-(gamma-Glu)(n+1).	Control
115252745	Peptoclostridium difficile 630	6.3.2.17	Tetrahydrofolate synthase.	ATP + tetrahydropteroyl-(gamma-Glu)(n) + L-glutamate = ADP + phosphate +tetrahydropteroyl-(gamma-Glu)(n+1).	Autism
291516108	Alistipes shahii WAL 8301	2.7.4.14	UMP/CMP kinase.	(1) ATP + (d)CMP = ADP + (d)CDP.(2) ATP + UMP = ADP + UDP.	Control
187426706	Akkermansia muciniphila ATCC BAA-835	2.7.4.14	UMP/CMP kinase.	(1) ATP + (d)CMP = ADP + (d)CDP.(2) ATP + UMP = ADP + UDP.	Autism
291516108	Alistipes shahii WAL 8301	2.7.4.14	UMP/CMP kinase.	(1) ATP + (d)CMP = ADP + (d)CDP.(2) ATP + UMP = ADP + UDP.	Control
110676061	Clostridium perfringens ATCC 13124	2.7.4.14	UMP/CMP kinase.	(1) ATP + (d)CMP = ADP + (d)CDP.(2) ATP + UMP = ADP + UDP.	Autism
291516108	Alistipes shahii WAL 8301	2.7.4.14	UMP/CMP kinase.	(1) ATP + (d)CMP = ADP + (d)CDP.(2) ATP + UMP = ADP + UDP.	Control
219869941	Desulfovibrio desulfuricans ATCC 27774	2.7.4.14	UMP/CMP kinase.	(1) ATP + (d)CMP = ADP + (d)CDP.(2) ATP + UMP = ADP + UDP.	Autism
291516108	Alistipes shahii WAL 8301	2.7.4.14	UMP/CMP kinase.	(1) ATP + (d)CMP = ADP + (d)CDP.(2) ATP + UMP = ADP + UDP.	Control
115252745	Peptoclostridium difficile 630	2.7.4.14	UMP/CMP kinase.	(1) ATP + (d)CMP = ADP + (d)CDP.(2) ATP + UMP = ADP + UDP.	Autism
291516108	Alistipes shahii WAL 8301	1.17.1.2	4-hydroxy-3-methylbut-2-enyl diphosphate reductase.	(1) Isopentenyl diphosphate + NAD(P)(+) + H(2)O = (E)-4-hydroxy-3-methylbut-2-en-1-yl diphosphate + NAD(P)H.(2) Dimethylallyl diphosphate + NAD(P)(+) + H(2)O = (E)-4-hydroxy-3-methylbut-2-en-1-yl diphosphate + NAD(P)H.	Control
187426706	Akkermansia muciniphila ATCC BAA-835	1.17.1.2	4-hydroxy-3-methylbut-2-enyl diphosphate reductase.	(1) Isopentenyl diphosphate + NAD(P)(+) + H(2)O = (E)-4-hydroxy-3-methylbut-2-en-1-yl diphosphate + NAD(P)H.(2) Dimethylallyl diphosphate + NAD(P)(+) + H(2)O = (E)-4-hydroxy-3-methylbut-2-en-1-yl diphosphate + NAD(P)H.	Autism
291516108	Alistipes shahii WAL 8301	1.17.1.2	4-hydroxy-3-methylbut-2-enyl diphosphate reductase.	(1) Isopentenyl diphosphate + NAD(P)(+) + H(2)O = (E)-4-hydroxy-3-methylbut-2-en-1-yl diphosphate + NAD(P)H.(2) Dimethylallyl diphosphate + NAD(P)(+) + H(2)O = (E)-4-hydroxy-3-methylbut-2-en-1-yl diphosphate + NAD(P)H.	Control
110676061	Clostridium perfringens ATCC 13124	1.17.1.2	4-hydroxy-3-methylbut-2-enyl diphosphate reductase.	(1) Isopentenyl diphosphate + NAD(P)(+) + H(2)O = (E)-4-hydroxy-3-methylbut-2-en-1-yl diphosphate + NAD(P)H.(2) Dimethylallyl diphosphate + NAD(P)(+) + H(2)O = (E)-4-hydroxy-3-methylbut-2-en-1-yl diphosphate + NAD(P)H.	Autism
291516108	Alistipes shahii WAL 8301	1.17.1.2	4-hydroxy-3-methylbut-2-enyl diphosphate reductase.	(1) Isopentenyl diphosphate + NAD(P)(+) + H(2)O = (E)-4-hydroxy-3-methylbut-2-en-1-yl diphosphate + NAD(P)H.(2) Dimethylallyl diphosphate + NAD(P)(+) + H(2)O = (E)-4-hydroxy-3-methylbut-2-en-1-yl diphosphate + NAD(P)H.	Control
219869941	Desulfovibrio desulfuricans ATCC 27774	1.17.1.2	4-hydroxy-3-methylbut-2-enyl diphosphate reductase.	(1) Isopentenyl diphosphate + NAD(P)(+) + H(2)O = (E)-4-hydroxy-3-methylbut-2-en-1-yl diphosphate + NAD(P)H.(2) Dimethylallyl diphosphate + NAD(P)(+) + H(2)O = (E)-4-hydroxy-3-methylbut-2-en-1-yl diphosphate + NAD(P)H.	Autism
291516108	Alistipes shahii WAL 8301	1.17.1.2	4-hydroxy-3-methylbut-2-enyl diphosphate reductase.	(1) Isopentenyl diphosphate + NAD(P)(+) + H(2)O = (E)-4-hydroxy-3-methylbut-2-en-1-yl diphosphate + NAD(P)H.(2) Dimethylallyl diphosphate + NAD(P)(+) + H(2)O = (E)-4-hydroxy-3-methylbut-2-en-1-yl diphosphate + NAD(P)H.	Control
115252745	Peptoclostridium difficile 630	1.17.1.2	4-hydroxy-3-methylbut-2-enyl diphosphate reductase.	(1) Isopentenyl diphosphate + NAD(P)(+) + H(2)O = (E)-4-hydroxy-3-methylbut-2-en-1-yl diphosphate + NAD(P)H.(2) Dimethylallyl diphosphate + NAD(P)(+) + H(2)O = (E)-4-hydroxy-3-methylbut-2-en-1-yl diphosphate + NAD(P)H.	Autism
291516108	Alistipes shahii WAL 8301	3.4.21.102	C-terminal processing peptidase.	The enzyme shows specific recognition of a C-terminal tripeptide, Xaa-Yaa-Zaa, in which Xaa is preferably Ala or Leu, Yaa is preferably Ala orTyr, and Zaa is preferably Ala, but then cleaves at a variable distancefrom the C-terminus. A typical cleavage is -Ala-Ala-|-Arg-Ala-Ala-Lys-Glu-Asn-Tyr-Ala-L	Control
187426706	Akkermansia muciniphila ATCC BAA-835	3.4.21.102	C-terminal processing peptidase.	The enzyme shows specific recognition of a C-terminal tripeptide, Xaa-Yaa-Zaa, in which Xaa is preferably Ala or Leu, Yaa is preferably Ala orTyr, and Zaa is preferably Ala, but then cleaves at a variable distancefrom the C-terminus. A typical cleavage is -Ala-Ala-|-Arg-Ala-Ala-Lys-Glu-Asn-Tyr-Ala-L	Autism
291516108	Alistipes shahii WAL 8301	3.4.21.102	C-terminal processing peptidase.	The enzyme shows specific recognition of a C-terminal tripeptide, Xaa-Yaa-Zaa, in which Xaa is preferably Ala or Leu, Yaa is preferably Ala orTyr, and Zaa is preferably Ala, but then cleaves at a variable distancefrom the C-terminus. A typical cleavage is -Ala-Ala-|-Arg-Ala-Ala-Lys-Glu-Asn-Tyr-Ala-L	Control
219869941	Desulfovibrio desulfuricans ATCC 27774	3.4.21.102	C-terminal processing peptidase.	The enzyme shows specific recognition of a C-terminal tripeptide, Xaa-Yaa-Zaa, in which Xaa is preferably Ala or Leu, Yaa is preferably Ala orTyr, and Zaa is preferably Ala, but then cleaves at a variable distancefrom the C-terminus. A typical cleavage is -Ala-Ala-|-Arg-Ala-Ala-Lys-Glu-Asn-Tyr-Ala-L	Autism
291516108	Alistipes shahii WAL 8301	3.4.21.102	C-terminal processing peptidase.	The enzyme shows specific recognition of a C-terminal tripeptide, Xaa-Yaa-Zaa, in which Xaa is preferably Ala or Leu, Yaa is preferably Ala orTyr, and Zaa is preferably Ala, but then cleaves at a variable distancefrom the C-terminus. A typical cleavage is -Ala-Ala-|-Arg-Ala-Ala-Lys-Glu-Asn-Tyr-Ala-L	Control
115252745	Peptoclostridium difficile 630	3.4.21.102	C-terminal processing peptidase.	The enzyme shows specific recognition of a C-terminal tripeptide, Xaa-Yaa-Zaa, in which Xaa is preferably Ala or Leu, Yaa is preferably Ala orTyr, and Zaa is preferably Ala, but then cleaves at a variable distancefrom the C-terminus. A typical cleavage is -Ala-Ala-|-Arg-Ala-Ala-Lys-Glu-Asn-Tyr-Ala-L	Autism
291516108	Alistipes shahii WAL 8301	2.4.2.9	Uracil phosphoribosyltransferase.	UMP + diphosphate = uracil + 5-phospho-alpha-D-ribose 1-diphosphate.	Control
110676061	Clostridium perfringens ATCC 13124	2.4.2.9	Uracil phosphoribosyltransferase.	UMP + diphosphate = uracil + 5-phospho-alpha-D-ribose 1-diphosphate.	Autism
291516108	Alistipes shahii WAL 8301	2.4.2.9	Uracil phosphoribosyltransferase.	UMP + diphosphate = uracil + 5-phospho-alpha-D-ribose 1-diphosphate.	Control
110676061	Clostridium perfringens ATCC 13124	2.4.2.9	Uracil phosphoribosyltransferase.	UMP + diphosphate = uracil + 5-phospho-alpha-D-ribose 1-diphosphate.	Autism
291516108	Alistipes shahii WAL 8301	2.4.2.9	Uracil phosphoribosyltransferase.	UMP + diphosphate = uracil + 5-phospho-alpha-D-ribose 1-diphosphate.	Control
219869941	Desulfovibrio desulfuricans ATCC 27774	2.4.2.9	Uracil phosphoribosyltransferase.	UMP + diphosphate = uracil + 5-phospho-alpha-D-ribose 1-diphosphate.	Autism
291516108	Alistipes shahii WAL 8301	2.4.2.9	Uracil phosphoribosyltransferase.	UMP + diphosphate = uracil + 5-phospho-alpha-D-ribose 1-diphosphate.	Control
115252745	Peptoclostridium difficile 630	2.4.2.9	Uracil phosphoribosyltransferase.	UMP + diphosphate = uracil + 5-phospho-alpha-D-ribose 1-diphosphate.	Autism
291516108	Alistipes shahii WAL 8301	2.4.2.9	Uracil phosphoribosyltransferase.	UMP + diphosphate = uracil + 5-phospho-alpha-D-ribose 1-diphosphate.	Control
115252745	Peptoclostridium difficile 630	2.4.2.9	Uracil phosphoribosyltransferase.	UMP + diphosphate = uracil + 5-phospho-alpha-D-ribose 1-diphosphate.	Autism
291516108	Alistipes shahii WAL 8301	2.4.2.29	tRNA-guanine(34) transglycosylase.	(1) Guanine(34) in tRNA + queuine = queuosine(34) in tRNA + guanine.(2) Guanine(34) in tRNA + 7-aminomethyl-7-carbaguanine = 7-aminomethyl-7-carbaguanine(34) in tRNA + guanine.	Control
187426706	Akkermansia muciniphila ATCC BAA-835	2.4.2.29	tRNA-guanine(34) transglycosylase.	(1) Guanine(34) in tRNA + queuine = queuosine(34) in tRNA + guanine.(2) Guanine(34) in tRNA + 7-aminomethyl-7-carbaguanine = 7-aminomethyl-7-carbaguanine(34) in tRNA + guanine.	Autism
291516108	Alistipes shahii WAL 8301	2.4.2.29	tRNA-guanine(34) transglycosylase.	(1) Guanine(34) in tRNA + queuine = queuosine(34) in tRNA + guanine.(2) Guanine(34) in tRNA + 7-aminomethyl-7-carbaguanine = 7-aminomethyl-7-carbaguanine(34) in tRNA + guanine.	Control
110676061	Clostridium perfringens ATCC 13124	2.4.2.29	tRNA-guanine(34) transglycosylase.	(1) Guanine(34) in tRNA + queuine = queuosine(34) in tRNA + guanine.(2) Guanine(34) in tRNA + 7-aminomethyl-7-carbaguanine = 7-aminomethyl-7-carbaguanine(34) in tRNA + guanine.	Autism
291516108	Alistipes shahii WAL 8301	2.4.2.29	tRNA-guanine(34) transglycosylase.	(1) Guanine(34) in tRNA + queuine = queuosine(34) in tRNA + guanine.(2) Guanine(34) in tRNA + 7-aminomethyl-7-carbaguanine = 7-aminomethyl-7-carbaguanine(34) in tRNA + guanine.	Control
219869941	Desulfovibrio desulfuricans ATCC 27774	2.4.2.29	tRNA-guanine(34) transglycosylase.	(1) Guanine(34) in tRNA + queuine = queuosine(34) in tRNA + guanine.(2) Guanine(34) in tRNA + 7-aminomethyl-7-carbaguanine = 7-aminomethyl-7-carbaguanine(34) in tRNA + guanine.	Autism
291516108	Alistipes shahii WAL 8301	2.4.2.29	tRNA-guanine(34) transglycosylase.	(1) Guanine(34) in tRNA + queuine = queuosine(34) in tRNA + guanine.(2) Guanine(34) in tRNA + 7-aminomethyl-7-carbaguanine = 7-aminomethyl-7-carbaguanine(34) in tRNA + guanine.	Control
115252745	Peptoclostridium difficile 630	2.4.2.29	tRNA-guanine(34) transglycosylase.	(1) Guanine(34) in tRNA + queuine = queuosine(34) in tRNA + guanine.(2) Guanine(34) in tRNA + 7-aminomethyl-7-carbaguanine = 7-aminomethyl-7-carbaguanine(34) in tRNA + guanine.	Autism
291516108	Alistipes shahii WAL 8301	5.4.99.12	tRNA pseudouridine(38-40) synthase.	tRNA uridine(38-40) = tRNA pseudouridine(38-40).	Control
187426706	Akkermansia muciniphila ATCC BAA-835	5.4.99.12	tRNA pseudouridine(38-40) synthase.	tRNA uridine(38-40) = tRNA pseudouridine(38-40).	Autism
291516108	Alistipes shahii WAL 8301	5.4.99.12	tRNA pseudouridine(38-40) synthase.	tRNA uridine(38-40) = tRNA pseudouridine(38-40).	Control
110676061	Clostridium perfringens ATCC 13124	5.4.99.12	tRNA pseudouridine(38-40) synthase.	tRNA uridine(38-40) = tRNA pseudouridine(38-40).	Autism
291516108	Alistipes shahii WAL 8301	5.4.99.12	tRNA pseudouridine(38-40) synthase.	tRNA uridine(38-40) = tRNA pseudouridine(38-40).	Control
110676061	Clostridium perfringens ATCC 13124	5.4.99.12	tRNA pseudouridine(38-40) synthase.	tRNA uridine(38-40) = tRNA pseudouridine(38-40).	Autism
291516108	Alistipes shahii WAL 8301	5.4.99.12	tRNA pseudouridine(38-40) synthase.	tRNA uridine(38-40) = tRNA pseudouridine(38-40).	Control
110676061	Clostridium perfringens ATCC 13124	5.4.99.12	tRNA pseudouridine(38-40) synthase.	tRNA uridine(38-40) = tRNA pseudouridine(38-40).	Autism
291516108	Alistipes shahii WAL 8301	5.4.99.12	tRNA pseudouridine(38-40) synthase.	tRNA uridine(38-40) = tRNA pseudouridine(38-40).	Control
219869941	Desulfovibrio desulfuricans ATCC 27774	5.4.99.12	tRNA pseudouridine(38-40) synthase.	tRNA uridine(38-40) = tRNA pseudouridine(38-40).	Autism
291516108	Alistipes shahii WAL 8301	5.4.99.12	tRNA pseudouridine(38-40) synthase.	tRNA uridine(38-40) = tRNA pseudouridine(38-40).	Control
115252745	Peptoclostridium difficile 630	5.4.99.12	tRNA pseudouridine(38-40) synthase.	tRNA uridine(38-40) = tRNA pseudouridine(38-40).	Autism
291516108	Alistipes shahii WAL 8301	5.4.99.12	tRNA pseudouridine(38-40) synthase.	tRNA uridine(38-40) = tRNA pseudouridine(38-40).	Control
115252745	Peptoclostridium difficile 630	5.4.99.12	tRNA pseudouridine(38-40) synthase.	tRNA uridine(38-40) = tRNA pseudouridine(38-40).	Autism
291516108	Alistipes shahii WAL 8301	2.7.7.7	DNA-directed DNA polymerase.	Deoxynucleoside triphosphate + DNA(n) = diphosphate + DNA(n+1).	Control
187426706	Akkermansia muciniphila ATCC BAA-835	2.7.7.7	DNA-directed DNA polymerase.	Deoxynucleoside triphosphate + DNA(n) = diphosphate + DNA(n+1).	Autism
291516108	Alistipes shahii WAL 8301	2.7.7.7	DNA-directed DNA polymerase.	Deoxynucleoside triphosphate + DNA(n) = diphosphate + DNA(n+1).	Control
187426706	Akkermansia muciniphila ATCC BAA-835	2.7.7.7	DNA-directed DNA polymerase.	Deoxynucleoside triphosphate + DNA(n) = diphosphate + DNA(n+1).	Autism
291516108	Alistipes shahii WAL 8301	2.7.7.7	DNA-directed DNA polymerase.	Deoxynucleoside triphosphate + DNA(n) = diphosphate + DNA(n+1).	Control
187426706	Akkermansia muciniphila ATCC BAA-835	2.7.7.7	DNA-directed DNA polymerase.	Deoxynucleoside triphosphate + DNA(n) = diphosphate + DNA(n+1).	Autism
291516108	Alistipes shahii WAL 8301	2.7.7.7	DNA-directed DNA polymerase.	Deoxynucleoside triphosphate + DNA(n) = diphosphate + DNA(n+1).	Control
187426706	Akkermansia muciniphila ATCC BAA-835	2.7.7.7	DNA-directed DNA polymerase.	Deoxynucleoside triphosphate + DNA(n) = diphosphate + DNA(n+1).	Autism
291516108	Alistipes shahii WAL 8301	2.7.7.7	DNA-directed DNA polymerase.	Deoxynucleoside triphosphate + DNA(n) = diphosphate + DNA(n+1).	Control
187426706	Akkermansia muciniphila ATCC BAA-835	2.7.7.7	DNA-directed DNA polymerase.	Deoxynucleoside triphosphate + DNA(n) = diphosphate + DNA(n+1).	Autism
291516108	Alistipes shahii WAL 8301	2.7.7.7	DNA-directed DNA polymerase.	Deoxynucleoside triphosphate + DNA(n) = diphosphate + DNA(n+1).	Control
110676061	Clostridium perfringens ATCC 13124	2.7.7.7	DNA-directed DNA polymerase.	Deoxynucleoside triphosphate + DNA(n) = diphosphate + DNA(n+1).	Autism
291516108	Alistipes shahii WAL 8301	2.7.7.7	DNA-directed DNA polymerase.	Deoxynucleoside triphosphate + DNA(n) = diphosphate + DNA(n+1).	Control
110676061	Clostridium perfringens ATCC 13124	2.7.7.7	DNA-directed DNA polymerase.	Deoxynucleoside triphosphate + DNA(n) = diphosphate + DNA(n+1).	Autism
291516108	Alistipes shahii WAL 8301	2.7.7.7	DNA-directed DNA polymerase.	Deoxynucleoside triphosphate + DNA(n) = diphosphate + DNA(n+1).	Control
110676061	Clostridium perfringens ATCC 13124	2.7.7.7	DNA-directed DNA polymerase.	Deoxynucleoside triphosphate + DNA(n) = diphosphate + DNA(n+1).	Autism
291516108	Alistipes shahii WAL 8301	2.7.7.7	DNA-directed DNA polymerase.	Deoxynucleoside triphosphate + DNA(n) = diphosphate + DNA(n+1).	Control
110676061	Clostridium perfringens ATCC 13124	2.7.7.7	DNA-directed DNA polymerase.	Deoxynucleoside triphosphate + DNA(n) = diphosphate + DNA(n+1).	Autism
291516108	Alistipes shahii WAL 8301	2.7.7.7	DNA-directed DNA polymerase.	Deoxynucleoside triphosphate + DNA(n) = diphosphate + DNA(n+1).	Control
110676061	Clostridium perfringens ATCC 13124	2.7.7.7	DNA-directed DNA polymerase.	Deoxynucleoside triphosphate + DNA(n) = diphosphate + DNA(n+1).	Autism
291516108	Alistipes shahii WAL 8301	2.7.7.7	DNA-directed DNA polymerase.	Deoxynucleoside triphosphate + DNA(n) = diphosphate + DNA(n+1).	Control
110676061	Clostridium perfringens ATCC 13124	2.7.7.7	DNA-directed DNA polymerase.	Deoxynucleoside triphosphate + DNA(n) = diphosphate + DNA(n+1).	Autism
291516108	Alistipes shahii WAL 8301	2.7.7.7	DNA-directed DNA polymerase.	Deoxynucleoside triphosphate + DNA(n) = diphosphate + DNA(n+1).	Control
219869941	Desulfovibrio desulfuricans ATCC 27774	2.7.7.7	DNA-directed DNA polymerase.	Deoxynucleoside triphosphate + DNA(n) = diphosphate + DNA(n+1).	Autism
291516108	Alistipes shahii WAL 8301	2.7.7.7	DNA-directed DNA polymerase.	Deoxynucleoside triphosphate + DNA(n) = diphosphate + DNA(n+1).	Control
219869941	Desulfovibrio desulfuricans ATCC 27774	2.7.7.7	DNA-directed DNA polymerase.	Deoxynucleoside triphosphate + DNA(n) = diphosphate + DNA(n+1).	Autism
291516108	Alistipes shahii WAL 8301	2.7.7.7	DNA-directed DNA polymerase.	Deoxynucleoside triphosphate + DNA(n) = diphosphate + DNA(n+1).	Control
219869941	Desulfovibrio desulfuricans ATCC 27774	2.7.7.7	DNA-directed DNA polymerase.	Deoxynucleoside triphosphate + DNA(n) = diphosphate + DNA(n+1).	Autism
291516108	Alistipes shahii WAL 8301	2.7.7.7	DNA-directed DNA polymerase.	Deoxynucleoside triphosphate + DNA(n) = diphosphate + DNA(n+1).	Control
219869941	Desulfovibrio desulfuricans ATCC 27774	2.7.7.7	DNA-directed DNA polymerase.	Deoxynucleoside triphosphate + DNA(n) = diphosphate + DNA(n+1).	Autism
291516108	Alistipes shahii WAL 8301	2.7.7.7	DNA-directed DNA polymerase.	Deoxynucleoside triphosphate + DNA(n) = diphosphate + DNA(n+1).	Control
219869941	Desulfovibrio desulfuricans ATCC 27774	2.7.7.7	DNA-directed DNA polymerase.	Deoxynucleoside triphosphate + DNA(n) = diphosphate + DNA(n+1).	Autism
291516108	Alistipes shahii WAL 8301	2.7.7.7	DNA-directed DNA polymerase.	Deoxynucleoside triphosphate + DNA(n) = diphosphate + DNA(n+1).	Control
115252745	Peptoclostridium difficile 630	2.7.7.7	DNA-directed DNA polymerase.	Deoxynucleoside triphosphate + DNA(n) = diphosphate + DNA(n+1).	Autism
291516108	Alistipes shahii WAL 8301	2.7.7.7	DNA-directed DNA polymerase.	Deoxynucleoside triphosphate + DNA(n) = diphosphate + DNA(n+1).	Control
115252745	Peptoclostridium difficile 630	2.7.7.7	DNA-directed DNA polymerase.	Deoxynucleoside triphosphate + DNA(n) = diphosphate + DNA(n+1).	Autism
291516108	Alistipes shahii WAL 8301	2.7.7.7	DNA-directed DNA polymerase.	Deoxynucleoside triphosphate + DNA(n) = diphosphate + DNA(n+1).	Control
115252745	Peptoclostridium difficile 630	2.7.7.7	DNA-directed DNA polymerase.	Deoxynucleoside triphosphate + DNA(n) = diphosphate + DNA(n+1).	Autism
291516108	Alistipes shahii WAL 8301	2.7.7.7	DNA-directed DNA polymerase.	Deoxynucleoside triphosphate + DNA(n) = diphosphate + DNA(n+1).	Control
115252745	Peptoclostridium difficile 630	2.7.7.7	DNA-directed DNA polymerase.	Deoxynucleoside triphosphate + DNA(n) = diphosphate + DNA(n+1).	Autism
291516108	Alistipes shahii WAL 8301	2.7.7.7	DNA-directed DNA polymerase.	Deoxynucleoside triphosphate + DNA(n) = diphosphate + DNA(n+1).	Control
115252745	Peptoclostridium difficile 630	2.7.7.7	DNA-directed DNA polymerase.	Deoxynucleoside triphosphate + DNA(n) = diphosphate + DNA(n+1).	Autism
291516108	Alistipes shahii WAL 8301	2.7.7.7	DNA-directed DNA polymerase.	Deoxynucleoside triphosphate + DNA(n) = diphosphate + DNA(n+1).	Control
115252745	Peptoclostridium difficile 630	2.7.7.7	DNA-directed DNA polymerase.	Deoxynucleoside triphosphate + DNA(n) = diphosphate + DNA(n+1).	Autism
291516108	Alistipes shahii WAL 8301	2.7.7.7	DNA-directed DNA polymerase.	Deoxynucleoside triphosphate + DNA(n) = diphosphate + DNA(n+1).	Control
115252745	Peptoclostridium difficile 630	2.7.7.7	DNA-directed DNA polymerase.	Deoxynucleoside triphosphate + DNA(n) = diphosphate + DNA(n+1).	Autism
291516108	Alistipes shahii WAL 8301	2.7.7.7	DNA-directed DNA polymerase.	Deoxynucleoside triphosphate + DNA(n) = diphosphate + DNA(n+1).	Control
115252745	Peptoclostridium difficile 630	2.7.7.7	DNA-directed DNA polymerase.	Deoxynucleoside triphosphate + DNA(n) = diphosphate + DNA(n+1).	Autism
291516108	Alistipes shahii WAL 8301	5.2.1.8	Peptidylprolyl isomerase.	Peptidylproline (omega=180) = peptidylproline (omega=0).	Control
187426706	Akkermansia muciniphila ATCC BAA-835	5.2.1.8	Peptidylprolyl isomerase.	Peptidylproline (omega=180) = peptidylproline (omega=0).	Autism
291516108	Alistipes shahii WAL 8301	5.2.1.8	Peptidylprolyl isomerase.	Peptidylproline (omega=180) = peptidylproline (omega=0).	Control
187426706	Akkermansia muciniphila ATCC BAA-835	5.2.1.8	Peptidylprolyl isomerase.	Peptidylproline (omega=180) = peptidylproline (omega=0).	Autism
291516108	Alistipes shahii WAL 8301	5.2.1.8	Peptidylprolyl isomerase.	Peptidylproline (omega=180) = peptidylproline (omega=0).	Control
110676061	Clostridium perfringens ATCC 13124	5.2.1.8	Peptidylprolyl isomerase.	Peptidylproline (omega=180) = peptidylproline (omega=0).	Autism
291516108	Alistipes shahii WAL 8301	5.2.1.8	Peptidylprolyl isomerase.	Peptidylproline (omega=180) = peptidylproline (omega=0).	Control
110676061	Clostridium perfringens ATCC 13124	5.2.1.8	Peptidylprolyl isomerase.	Peptidylproline (omega=180) = peptidylproline (omega=0).	Autism
291516108	Alistipes shahii WAL 8301	5.2.1.8	Peptidylprolyl isomerase.	Peptidylproline (omega=180) = peptidylproline (omega=0).	Control
115252745	Peptoclostridium difficile 630	5.2.1.8	Peptidylprolyl isomerase.	Peptidylproline (omega=180) = peptidylproline (omega=0).	Autism
291516108	Alistipes shahii WAL 8301	5.2.1.8	Peptidylprolyl isomerase.	Peptidylproline (omega=180) = peptidylproline (omega=0).	Control
115252745	Peptoclostridium difficile 630	5.2.1.8	Peptidylprolyl isomerase.	Peptidylproline (omega=180) = peptidylproline (omega=0).	Autism
291516108	Alistipes shahii WAL 8301	5.2.1.8	Peptidylprolyl isomerase.	Peptidylproline (omega=180) = peptidylproline (omega=0).	Control
115252745	Peptoclostridium difficile 630	5.2.1.8	Peptidylprolyl isomerase.	Peptidylproline (omega=180) = peptidylproline (omega=0).	Autism
291516108	Alistipes shahii WAL 8301	5.2.1.8	Peptidylprolyl isomerase.	Peptidylproline (omega=180) = peptidylproline (omega=0).	Control
115252745	Peptoclostridium difficile 630	5.2.1.8	Peptidylprolyl isomerase.	Peptidylproline (omega=180) = peptidylproline (omega=0).	Autism
291516108	Alistipes shahii WAL 8301	5.2.1.8	Peptidylprolyl isomerase.	Peptidylproline (omega=180) = peptidylproline (omega=0).	Control
115252745	Peptoclostridium difficile 630	5.2.1.8	Peptidylprolyl isomerase.	Peptidylproline (omega=180) = peptidylproline (omega=0).	Autism
291516108	Alistipes shahii WAL 8301	2.3.1.29	Glycine C-acetyltransferase.	Acetyl-CoA + glycine = CoA + 2-amino-3-oxobutanoate.	Control
219869941	Desulfovibrio desulfuricans ATCC 27774	2.3.1.29	Glycine C-acetyltransferase.	Acetyl-CoA + glycine = CoA + 2-amino-3-oxobutanoate.	Autism
291516108	Alistipes shahii WAL 8301	3.1.1.29	Aminoacyl-tRNA hydrolase.	N-substituted aminoacyl-tRNA + H(2)O = N-substituted amino acid + tRNA.	Control
187426706	Akkermansia muciniphila ATCC BAA-835	3.1.1.29	Aminoacyl-tRNA hydrolase.	N-substituted aminoacyl-tRNA + H(2)O = N-substituted amino acid + tRNA.	Autism
291516108	Alistipes shahii WAL 8301	3.1.1.29	Aminoacyl-tRNA hydrolase.	N-substituted aminoacyl-tRNA + H(2)O = N-substituted amino acid + tRNA.	Control
110676061	Clostridium perfringens ATCC 13124	3.1.1.29	Aminoacyl-tRNA hydrolase.	N-substituted aminoacyl-tRNA + H(2)O = N-substituted amino acid + tRNA.	Autism
291516108	Alistipes shahii WAL 8301	3.1.1.29	Aminoacyl-tRNA hydrolase.	N-substituted aminoacyl-tRNA + H(2)O = N-substituted amino acid + tRNA.	Control
219869941	Desulfovibrio desulfuricans ATCC 27774	3.1.1.29	Aminoacyl-tRNA hydrolase.	N-substituted aminoacyl-tRNA + H(2)O = N-substituted amino acid + tRNA.	Autism
291516108	Alistipes shahii WAL 8301	3.1.1.29	Aminoacyl-tRNA hydrolase.	N-substituted aminoacyl-tRNA + H(2)O = N-substituted amino acid + tRNA.	Control
115252745	Peptoclostridium difficile 630	3.1.1.29	Aminoacyl-tRNA hydrolase.	N-substituted aminoacyl-tRNA + H(2)O = N-substituted amino acid + tRNA.	Autism
291516108	Alistipes shahii WAL 8301	6.3.2.9	UDP-N-acetylmuramoyl-L-alanine--D-glutamate ligase.	ATP + UDP-N-acetylmuramoyl-L-alanine + glutamate = ADP + phosphate + UDP-N-acetylmuramoyl-L-alanyl-D-glutamate.	Control
110676061	Clostridium perfringens ATCC 13124	6.3.2.9	UDP-N-acetylmuramoyl-L-alanine--D-glutamate ligase.	ATP + UDP-N-acetylmuramoyl-L-alanine + glutamate = ADP + phosphate + UDP-N-acetylmuramoyl-L-alanyl-D-glutamate.	Autism
291516108	Alistipes shahii WAL 8301	6.3.2.9	UDP-N-acetylmuramoyl-L-alanine--D-glutamate ligase.	ATP + UDP-N-acetylmuramoyl-L-alanine + glutamate = ADP + phosphate + UDP-N-acetylmuramoyl-L-alanyl-D-glutamate.	Control
115252745	Peptoclostridium difficile 630	6.3.2.9	UDP-N-acetylmuramoyl-L-alanine--D-glutamate ligase.	ATP + UDP-N-acetylmuramoyl-L-alanine + glutamate = ADP + phosphate + UDP-N-acetylmuramoyl-L-alanyl-D-glutamate.	Autism
291516108	Alistipes shahii WAL 8301	2.7.8.13	Phospho-N-acetylmuramoyl-pentapeptide-transferase.	UDP-Mur2Ac(oyl-L-Ala-gamma-D-Glu-L-Lys-D-Ala-D-Ala) + undecaprenylphosphate = UMP + Mur2Ac(oyl-L-Ala-gamma-D-Glu-L-Lys-D-Ala-D-Ala)-diphosphoundecaprenol.	Control
187426706	Akkermansia muciniphila ATCC BAA-835	2.7.8.13	Phospho-N-acetylmuramoyl-pentapeptide-transferase.	UDP-Mur2Ac(oyl-L-Ala-gamma-D-Glu-L-Lys-D-Ala-D-Ala) + undecaprenylphosphate = UMP + Mur2Ac(oyl-L-Ala-gamma-D-Glu-L-Lys-D-Ala-D-Ala)-diphosphoundecaprenol.	Autism
291516108	Alistipes shahii WAL 8301	2.7.8.13	Phospho-N-acetylmuramoyl-pentapeptide-transferase.	UDP-Mur2Ac(oyl-L-Ala-gamma-D-Glu-L-Lys-D-Ala-D-Ala) + undecaprenylphosphate = UMP + Mur2Ac(oyl-L-Ala-gamma-D-Glu-L-Lys-D-Ala-D-Ala)-diphosphoundecaprenol.	Control
110676061	Clostridium perfringens ATCC 13124	2.7.8.13	Phospho-N-acetylmuramoyl-pentapeptide-transferase.	UDP-Mur2Ac(oyl-L-Ala-gamma-D-Glu-L-Lys-D-Ala-D-Ala) + undecaprenylphosphate = UMP + Mur2Ac(oyl-L-Ala-gamma-D-Glu-L-Lys-D-Ala-D-Ala)-diphosphoundecaprenol.	Autism
291516108	Alistipes shahii WAL 8301	2.7.8.13	Phospho-N-acetylmuramoyl-pentapeptide-transferase.	UDP-Mur2Ac(oyl-L-Ala-gamma-D-Glu-L-Lys-D-Ala-D-Ala) + undecaprenylphosphate = UMP + Mur2Ac(oyl-L-Ala-gamma-D-Glu-L-Lys-D-Ala-D-Ala)-diphosphoundecaprenol.	Control
219869941	Desulfovibrio desulfuricans ATCC 27774	2.7.8.13	Phospho-N-acetylmuramoyl-pentapeptide-transferase.	UDP-Mur2Ac(oyl-L-Ala-gamma-D-Glu-L-Lys-D-Ala-D-Ala) + undecaprenylphosphate = UMP + Mur2Ac(oyl-L-Ala-gamma-D-Glu-L-Lys-D-Ala-D-Ala)-diphosphoundecaprenol.	Autism
291516108	Alistipes shahii WAL 8301	2.7.8.13	Phospho-N-acetylmuramoyl-pentapeptide-transferase.	UDP-Mur2Ac(oyl-L-Ala-gamma-D-Glu-L-Lys-D-Ala-D-Ala) + undecaprenylphosphate = UMP + Mur2Ac(oyl-L-Ala-gamma-D-Glu-L-Lys-D-Ala-D-Ala)-diphosphoundecaprenol.	Control
115252745	Peptoclostridium difficile 630	2.7.8.13	Phospho-N-acetylmuramoyl-pentapeptide-transferase.	UDP-Mur2Ac(oyl-L-Ala-gamma-D-Glu-L-Lys-D-Ala-D-Ala) + undecaprenylphosphate = UMP + Mur2Ac(oyl-L-Ala-gamma-D-Glu-L-Lys-D-Ala-D-Ala)-diphosphoundecaprenol.	Autism
291516108	Alistipes shahii WAL 8301	6.3.2.13	UDP-N-acetylmuramoyl-L-alanyl-D-glutamate--2,6-diaminopimelate ligase.	ATP + UDP-N-acetylmuramoyl-L-alanyl-D-glutamate + meso-2,6-diaminoheptanedioate = ADP + phosphate + UDP-N-acetylmuramoyl-L-alanyl-D-gamma-glutamyl-meso-2,6-diamino-heptanedioate.	Control
110676061	Clostridium perfringens ATCC 13124	6.3.2.13	UDP-N-acetylmuramoyl-L-alanyl-D-glutamate--2,6-diaminopimelate ligase.	ATP + UDP-N-acetylmuramoyl-L-alanyl-D-glutamate + meso-2,6-diaminoheptanedioate = ADP + phosphate + UDP-N-acetylmuramoyl-L-alanyl-D-gamma-glutamyl-meso-2,6-diamino-heptanedioate.	Autism
291516108	Alistipes shahii WAL 8301	6.3.2.13	UDP-N-acetylmuramoyl-L-alanyl-D-glutamate--2,6-diaminopimelate ligase.	ATP + UDP-N-acetylmuramoyl-L-alanyl-D-glutamate + meso-2,6-diaminoheptanedioate = ADP + phosphate + UDP-N-acetylmuramoyl-L-alanyl-D-gamma-glutamyl-meso-2,6-diamino-heptanedioate.	Control
115252745	Peptoclostridium difficile 630	6.3.2.13	UDP-N-acetylmuramoyl-L-alanyl-D-glutamate--2,6-diaminopimelate ligase.	ATP + UDP-N-acetylmuramoyl-L-alanyl-D-glutamate + meso-2,6-diaminoheptanedioate = ADP + phosphate + UDP-N-acetylmuramoyl-L-alanyl-D-gamma-glutamyl-meso-2,6-diamino-heptanedioate.	Autism
291516108	Alistipes shahii WAL 8301	2.4.1.129	Peptidoglycan glycosyltransferase.	(GlcNAc-(1->4)-Mur2Ac(oyl-L-Ala-gamma-D-Glu-L-Lys-D-Ala-D-Ala))(n)-diphosphoundecaprenol + GlcNAc-(1->4)-Mur2Ac(oyl-L-Ala-gamma-D-Glu-L-Lys-D-Ala-D-Ala)-diphosphoundecaprenol = (GlcNAc-(1->4)-Mur2Ac(oyl-L-Ala-gamma-D-Glu-L-Lys-D-Ala-D-Ala))(n+1)-diphosphoundecaprenol + undecaprenyldiphosphate.	Control
187426706	Akkermansia muciniphila ATCC BAA-835	2.4.1.129	Peptidoglycan glycosyltransferase.	(GlcNAc-(1->4)-Mur2Ac(oyl-L-Ala-gamma-D-Glu-L-Lys-D-Ala-D-Ala))(n)-diphosphoundecaprenol + GlcNAc-(1->4)-Mur2Ac(oyl-L-Ala-gamma-D-Glu-L-Lys-D-Ala-D-Ala)-diphosphoundecaprenol = (GlcNAc-(1->4)-Mur2Ac(oyl-L-Ala-gamma-D-Glu-L-Lys-D-Ala-D-Ala))(n+1)-diphosphoundecaprenol + undecaprenyldiphosphate.	Autism
291516108	Alistipes shahii WAL 8301	2.4.1.129	Peptidoglycan glycosyltransferase.	(GlcNAc-(1->4)-Mur2Ac(oyl-L-Ala-gamma-D-Glu-L-Lys-D-Ala-D-Ala))(n)-diphosphoundecaprenol + GlcNAc-(1->4)-Mur2Ac(oyl-L-Ala-gamma-D-Glu-L-Lys-D-Ala-D-Ala)-diphosphoundecaprenol = (GlcNAc-(1->4)-Mur2Ac(oyl-L-Ala-gamma-D-Glu-L-Lys-D-Ala-D-Ala))(n+1)-diphosphoundecaprenol + undecaprenyldiphosphate.	Control
187426706	Akkermansia muciniphila ATCC BAA-835	2.4.1.129	Peptidoglycan glycosyltransferase.	(GlcNAc-(1->4)-Mur2Ac(oyl-L-Ala-gamma-D-Glu-L-Lys-D-Ala-D-Ala))(n)-diphosphoundecaprenol + GlcNAc-(1->4)-Mur2Ac(oyl-L-Ala-gamma-D-Glu-L-Lys-D-Ala-D-Ala)-diphosphoundecaprenol = (GlcNAc-(1->4)-Mur2Ac(oyl-L-Ala-gamma-D-Glu-L-Lys-D-Ala-D-Ala))(n+1)-diphosphoundecaprenol + undecaprenyldiphosphate.	Autism
291516108	Alistipes shahii WAL 8301	2.4.1.129	Peptidoglycan glycosyltransferase.	(GlcNAc-(1->4)-Mur2Ac(oyl-L-Ala-gamma-D-Glu-L-Lys-D-Ala-D-Ala))(n)-diphosphoundecaprenol + GlcNAc-(1->4)-Mur2Ac(oyl-L-Ala-gamma-D-Glu-L-Lys-D-Ala-D-Ala)-diphosphoundecaprenol = (GlcNAc-(1->4)-Mur2Ac(oyl-L-Ala-gamma-D-Glu-L-Lys-D-Ala-D-Ala))(n+1)-diphosphoundecaprenol + undecaprenyldiphosphate.	Control
187426706	Akkermansia muciniphila ATCC BAA-835	2.4.1.129	Peptidoglycan glycosyltransferase.	(GlcNAc-(1->4)-Mur2Ac(oyl-L-Ala-gamma-D-Glu-L-Lys-D-Ala-D-Ala))(n)-diphosphoundecaprenol + GlcNAc-(1->4)-Mur2Ac(oyl-L-Ala-gamma-D-Glu-L-Lys-D-Ala-D-Ala)-diphosphoundecaprenol = (GlcNAc-(1->4)-Mur2Ac(oyl-L-Ala-gamma-D-Glu-L-Lys-D-Ala-D-Ala))(n+1)-diphosphoundecaprenol + undecaprenyldiphosphate.	Autism
291516108	Alistipes shahii WAL 8301	2.4.1.129	Peptidoglycan glycosyltransferase.	(GlcNAc-(1->4)-Mur2Ac(oyl-L-Ala-gamma-D-Glu-L-Lys-D-Ala-D-Ala))(n)-diphosphoundecaprenol + GlcNAc-(1->4)-Mur2Ac(oyl-L-Ala-gamma-D-Glu-L-Lys-D-Ala-D-Ala)-diphosphoundecaprenol = (GlcNAc-(1->4)-Mur2Ac(oyl-L-Ala-gamma-D-Glu-L-Lys-D-Ala-D-Ala))(n+1)-diphosphoundecaprenol + undecaprenyldiphosphate.	Control
219869941	Desulfovibrio desulfuricans ATCC 27774	2.4.1.129	Peptidoglycan glycosyltransferase.	(GlcNAc-(1->4)-Mur2Ac(oyl-L-Ala-gamma-D-Glu-L-Lys-D-Ala-D-Ala))(n)-diphosphoundecaprenol + GlcNAc-(1->4)-Mur2Ac(oyl-L-Ala-gamma-D-Glu-L-Lys-D-Ala-D-Ala)-diphosphoundecaprenol = (GlcNAc-(1->4)-Mur2Ac(oyl-L-Ala-gamma-D-Glu-L-Lys-D-Ala-D-Ala))(n+1)-diphosphoundecaprenol + undecaprenyldiphosphate.	Autism
291516108	Alistipes shahii WAL 8301	2.4.1.129	Peptidoglycan glycosyltransferase.	(GlcNAc-(1->4)-Mur2Ac(oyl-L-Ala-gamma-D-Glu-L-Lys-D-Ala-D-Ala))(n)-diphosphoundecaprenol + GlcNAc-(1->4)-Mur2Ac(oyl-L-Ala-gamma-D-Glu-L-Lys-D-Ala-D-Ala)-diphosphoundecaprenol = (GlcNAc-(1->4)-Mur2Ac(oyl-L-Ala-gamma-D-Glu-L-Lys-D-Ala-D-Ala))(n+1)-diphosphoundecaprenol + undecaprenyldiphosphate.	Control
219869941	Desulfovibrio desulfuricans ATCC 27774	2.4.1.129	Peptidoglycan glycosyltransferase.	(GlcNAc-(1->4)-Mur2Ac(oyl-L-Ala-gamma-D-Glu-L-Lys-D-Ala-D-Ala))(n)-diphosphoundecaprenol + GlcNAc-(1->4)-Mur2Ac(oyl-L-Ala-gamma-D-Glu-L-Lys-D-Ala-D-Ala)-diphosphoundecaprenol = (GlcNAc-(1->4)-Mur2Ac(oyl-L-Ala-gamma-D-Glu-L-Lys-D-Ala-D-Ala))(n+1)-diphosphoundecaprenol + undecaprenyldiphosphate.	Autism
291516108	Alistipes shahii WAL 8301	2.4.1.129	Peptidoglycan glycosyltransferase.	(GlcNAc-(1->4)-Mur2Ac(oyl-L-Ala-gamma-D-Glu-L-Lys-D-Ala-D-Ala))(n)-diphosphoundecaprenol + GlcNAc-(1->4)-Mur2Ac(oyl-L-Ala-gamma-D-Glu-L-Lys-D-Ala-D-Ala)-diphosphoundecaprenol = (GlcNAc-(1->4)-Mur2Ac(oyl-L-Ala-gamma-D-Glu-L-Lys-D-Ala-D-Ala))(n+1)-diphosphoundecaprenol + undecaprenyldiphosphate.	Control
219869941	Desulfovibrio desulfuricans ATCC 27774	2.4.1.129	Peptidoglycan glycosyltransferase.	(GlcNAc-(1->4)-Mur2Ac(oyl-L-Ala-gamma-D-Glu-L-Lys-D-Ala-D-Ala))(n)-diphosphoundecaprenol + GlcNAc-(1->4)-Mur2Ac(oyl-L-Ala-gamma-D-Glu-L-Lys-D-Ala-D-Ala)-diphosphoundecaprenol = (GlcNAc-(1->4)-Mur2Ac(oyl-L-Ala-gamma-D-Glu-L-Lys-D-Ala-D-Ala))(n+1)-diphosphoundecaprenol + undecaprenyldiphosphate.	Autism
291516108	Alistipes shahii WAL 8301	2.4.1.129	Peptidoglycan glycosyltransferase.	(GlcNAc-(1->4)-Mur2Ac(oyl-L-Ala-gamma-D-Glu-L-Lys-D-Ala-D-Ala))(n)-diphosphoundecaprenol + GlcNAc-(1->4)-Mur2Ac(oyl-L-Ala-gamma-D-Glu-L-Lys-D-Ala-D-Ala)-diphosphoundecaprenol = (GlcNAc-(1->4)-Mur2Ac(oyl-L-Ala-gamma-D-Glu-L-Lys-D-Ala-D-Ala))(n+1)-diphosphoundecaprenol + undecaprenyldiphosphate.	Control
115252745	Peptoclostridium difficile 630	2.4.1.129	Peptidoglycan glycosyltransferase.	(GlcNAc-(1->4)-Mur2Ac(oyl-L-Ala-gamma-D-Glu-L-Lys-D-Ala-D-Ala))(n)-diphosphoundecaprenol + GlcNAc-(1->4)-Mur2Ac(oyl-L-Ala-gamma-D-Glu-L-Lys-D-Ala-D-Ala)-diphosphoundecaprenol = (GlcNAc-(1->4)-Mur2Ac(oyl-L-Ala-gamma-D-Glu-L-Lys-D-Ala-D-Ala))(n+1)-diphosphoundecaprenol + undecaprenyldiphosphate.	Autism
291516108	Alistipes shahii WAL 8301	2.4.1.129	Peptidoglycan glycosyltransferase.	(GlcNAc-(1->4)-Mur2Ac(oyl-L-Ala-gamma-D-Glu-L-Lys-D-Ala-D-Ala))(n)-diphosphoundecaprenol + GlcNAc-(1->4)-Mur2Ac(oyl-L-Ala-gamma-D-Glu-L-Lys-D-Ala-D-Ala)-diphosphoundecaprenol = (GlcNAc-(1->4)-Mur2Ac(oyl-L-Ala-gamma-D-Glu-L-Lys-D-Ala-D-Ala))(n+1)-diphosphoundecaprenol + undecaprenyldiphosphate.	Control
115252745	Peptoclostridium difficile 630	2.4.1.129	Peptidoglycan glycosyltransferase.	(GlcNAc-(1->4)-Mur2Ac(oyl-L-Ala-gamma-D-Glu-L-Lys-D-Ala-D-Ala))(n)-diphosphoundecaprenol + GlcNAc-(1->4)-Mur2Ac(oyl-L-Ala-gamma-D-Glu-L-Lys-D-Ala-D-Ala)-diphosphoundecaprenol = (GlcNAc-(1->4)-Mur2Ac(oyl-L-Ala-gamma-D-Glu-L-Lys-D-Ala-D-Ala))(n+1)-diphosphoundecaprenol + undecaprenyldiphosphate.	Autism
291516108	Alistipes shahii WAL 8301	3.1.4.46	Glycerophosphodiester phosphodiesterase.	A glycerophosphodiester + H(2)O = an alcohol + sn-glycerol 3-phosphate.	Control
115252745	Peptoclostridium difficile 630	3.1.4.46	Glycerophosphodiester phosphodiesterase.	A glycerophosphodiester + H(2)O = an alcohol + sn-glycerol 3-phosphate.	Autism
291516108	Alistipes shahii WAL 8301	3.1.4.46	Glycerophosphodiester phosphodiesterase.	A glycerophosphodiester + H(2)O = an alcohol + sn-glycerol 3-phosphate.	Control
115252745	Peptoclostridium difficile 630	3.1.4.46	Glycerophosphodiester phosphodiesterase.	A glycerophosphodiester + H(2)O = an alcohol + sn-glycerol 3-phosphate.	Autism
291516108	Alistipes shahii WAL 8301	2.7.2.3	Phosphoglycerate kinase.	ATP + 3-phospho-D-glycerate = ADP + 3-phospho-D-glyceroyl phosphate.	Control
187426706	Akkermansia muciniphila ATCC BAA-835	2.7.2.3	Phosphoglycerate kinase.	ATP + 3-phospho-D-glycerate = ADP + 3-phospho-D-glyceroyl phosphate.	Autism
291516108	Alistipes shahii WAL 8301	2.7.2.3	Phosphoglycerate kinase.	ATP + 3-phospho-D-glycerate = ADP + 3-phospho-D-glyceroyl phosphate.	Control
110676061	Clostridium perfringens ATCC 13124	2.7.2.3	Phosphoglycerate kinase.	ATP + 3-phospho-D-glycerate = ADP + 3-phospho-D-glyceroyl phosphate.	Autism
291516108	Alistipes shahii WAL 8301	2.7.2.3	Phosphoglycerate kinase.	ATP + 3-phospho-D-glycerate = ADP + 3-phospho-D-glyceroyl phosphate.	Control
219869941	Desulfovibrio desulfuricans ATCC 27774	2.7.2.3	Phosphoglycerate kinase.	ATP + 3-phospho-D-glycerate = ADP + 3-phospho-D-glyceroyl phosphate.	Autism
291516108	Alistipes shahii WAL 8301	2.7.2.3	Phosphoglycerate kinase.	ATP + 3-phospho-D-glycerate = ADP + 3-phospho-D-glyceroyl phosphate.	Control
115252745	Peptoclostridium difficile 630	2.7.2.3	Phosphoglycerate kinase.	ATP + 3-phospho-D-glycerate = ADP + 3-phospho-D-glyceroyl phosphate.	Autism
291516108	Alistipes shahii WAL 8301	6.1.1.20	Phenylalanine--tRNA ligase.	ATP + L-phenylalanine + tRNA(Phe) = AMP + diphosphate + L-phenylalanyl-tRNA(Phe).	Control
187426706	Akkermansia muciniphila ATCC BAA-835	6.1.1.20	Phenylalanine--tRNA ligase.	ATP + L-phenylalanine + tRNA(Phe) = AMP + diphosphate + L-phenylalanyl-tRNA(Phe).	Autism
291516108	Alistipes shahii WAL 8301	6.1.1.20	Phenylalanine--tRNA ligase.	ATP + L-phenylalanine + tRNA(Phe) = AMP + diphosphate + L-phenylalanyl-tRNA(Phe).	Control
110676061	Clostridium perfringens ATCC 13124	6.1.1.20	Phenylalanine--tRNA ligase.	ATP + L-phenylalanine + tRNA(Phe) = AMP + diphosphate + L-phenylalanyl-tRNA(Phe).	Autism
291516108	Alistipes shahii WAL 8301	6.1.1.20	Phenylalanine--tRNA ligase.	ATP + L-phenylalanine + tRNA(Phe) = AMP + diphosphate + L-phenylalanyl-tRNA(Phe).	Control
110676061	Clostridium perfringens ATCC 13124	6.1.1.20	Phenylalanine--tRNA ligase.	ATP + L-phenylalanine + tRNA(Phe) = AMP + diphosphate + L-phenylalanyl-tRNA(Phe).	Autism
291516108	Alistipes shahii WAL 8301	6.1.1.20	Phenylalanine--tRNA ligase.	ATP + L-phenylalanine + tRNA(Phe) = AMP + diphosphate + L-phenylalanyl-tRNA(Phe).	Control
219869941	Desulfovibrio desulfuricans ATCC 27774	6.1.1.20	Phenylalanine--tRNA ligase.	ATP + L-phenylalanine + tRNA(Phe) = AMP + diphosphate + L-phenylalanyl-tRNA(Phe).	Autism
291516108	Alistipes shahii WAL 8301	6.1.1.20	Phenylalanine--tRNA ligase.	ATP + L-phenylalanine + tRNA(Phe) = AMP + diphosphate + L-phenylalanyl-tRNA(Phe).	Control
115252745	Peptoclostridium difficile 630	6.1.1.20	Phenylalanine--tRNA ligase.	ATP + L-phenylalanine + tRNA(Phe) = AMP + diphosphate + L-phenylalanyl-tRNA(Phe).	Autism
291516108	Alistipes shahii WAL 8301	6.1.1.20	Phenylalanine--tRNA ligase.	ATP + L-phenylalanine + tRNA(Phe) = AMP + diphosphate + L-phenylalanyl-tRNA(Phe).	Control
115252745	Peptoclostridium difficile 630	6.1.1.20	Phenylalanine--tRNA ligase.	ATP + L-phenylalanine + tRNA(Phe) = AMP + diphosphate + L-phenylalanyl-tRNA(Phe).	Autism
291516108	Alistipes shahii WAL 8301	6.1.1.10	Methionine--tRNA ligase.	ATP + L-methionine + tRNA(Met) = AMP + diphosphate + L-methionyl-tRNA(Met).	Control
110676061	Clostridium perfringens ATCC 13124	6.1.1.10	Methionine--tRNA ligase.	ATP + L-methionine + tRNA(Met) = AMP + diphosphate + L-methionyl-tRNA(Met).	Autism
291516108	Alistipes shahii WAL 8301	6.1.1.10	Methionine--tRNA ligase.	ATP + L-methionine + tRNA(Met) = AMP + diphosphate + L-methionyl-tRNA(Met).	Control
110676061	Clostridium perfringens ATCC 13124	6.1.1.10	Methionine--tRNA ligase.	ATP + L-methionine + tRNA(Met) = AMP + diphosphate + L-methionyl-tRNA(Met).	Autism
291516108	Alistipes shahii WAL 8301	6.1.1.10	Methionine--tRNA ligase.	ATP + L-methionine + tRNA(Met) = AMP + diphosphate + L-methionyl-tRNA(Met).	Control
115252745	Peptoclostridium difficile 630	6.1.1.10	Methionine--tRNA ligase.	ATP + L-methionine + tRNA(Met) = AMP + diphosphate + L-methionyl-tRNA(Met).	Autism
291516108	Alistipes shahii WAL 8301	2.7.7.7	DNA-directed DNA polymerase.	Deoxynucleoside triphosphate + DNA(n) = diphosphate + DNA(n+1).	Control
187426706	Akkermansia muciniphila ATCC BAA-835	2.7.7.7	DNA-directed DNA polymerase.	Deoxynucleoside triphosphate + DNA(n) = diphosphate + DNA(n+1).	Autism
291516108	Alistipes shahii WAL 8301	2.7.7.7	DNA-directed DNA polymerase.	Deoxynucleoside triphosphate + DNA(n) = diphosphate + DNA(n+1).	Control
187426706	Akkermansia muciniphila ATCC BAA-835	2.7.7.7	DNA-directed DNA polymerase.	Deoxynucleoside triphosphate + DNA(n) = diphosphate + DNA(n+1).	Autism
291516108	Alistipes shahii WAL 8301	2.7.7.7	DNA-directed DNA polymerase.	Deoxynucleoside triphosphate + DNA(n) = diphosphate + DNA(n+1).	Control
187426706	Akkermansia muciniphila ATCC BAA-835	2.7.7.7	DNA-directed DNA polymerase.	Deoxynucleoside triphosphate + DNA(n) = diphosphate + DNA(n+1).	Autism
291516108	Alistipes shahii WAL 8301	2.7.7.7	DNA-directed DNA polymerase.	Deoxynucleoside triphosphate + DNA(n) = diphosphate + DNA(n+1).	Control
187426706	Akkermansia muciniphila ATCC BAA-835	2.7.7.7	DNA-directed DNA polymerase.	Deoxynucleoside triphosphate + DNA(n) = diphosphate + DNA(n+1).	Autism
291516108	Alistipes shahii WAL 8301	2.7.7.7	DNA-directed DNA polymerase.	Deoxynucleoside triphosphate + DNA(n) = diphosphate + DNA(n+1).	Control
187426706	Akkermansia muciniphila ATCC BAA-835	2.7.7.7	DNA-directed DNA polymerase.	Deoxynucleoside triphosphate + DNA(n) = diphosphate + DNA(n+1).	Autism
291516108	Alistipes shahii WAL 8301	2.7.7.7	DNA-directed DNA polymerase.	Deoxynucleoside triphosphate + DNA(n) = diphosphate + DNA(n+1).	Control
110676061	Clostridium perfringens ATCC 13124	2.7.7.7	DNA-directed DNA polymerase.	Deoxynucleoside triphosphate + DNA(n) = diphosphate + DNA(n+1).	Autism
291516108	Alistipes shahii WAL 8301	2.7.7.7	DNA-directed DNA polymerase.	Deoxynucleoside triphosphate + DNA(n) = diphosphate + DNA(n+1).	Control
110676061	Clostridium perfringens ATCC 13124	2.7.7.7	DNA-directed DNA polymerase.	Deoxynucleoside triphosphate + DNA(n) = diphosphate + DNA(n+1).	Autism
291516108	Alistipes shahii WAL 8301	2.7.7.7	DNA-directed DNA polymerase.	Deoxynucleoside triphosphate + DNA(n) = diphosphate + DNA(n+1).	Control
110676061	Clostridium perfringens ATCC 13124	2.7.7.7	DNA-directed DNA polymerase.	Deoxynucleoside triphosphate + DNA(n) = diphosphate + DNA(n+1).	Autism
291516108	Alistipes shahii WAL 8301	2.7.7.7	DNA-directed DNA polymerase.	Deoxynucleoside triphosphate + DNA(n) = diphosphate + DNA(n+1).	Control
110676061	Clostridium perfringens ATCC 13124	2.7.7.7	DNA-directed DNA polymerase.	Deoxynucleoside triphosphate + DNA(n) = diphosphate + DNA(n+1).	Autism
291516108	Alistipes shahii WAL 8301	2.7.7.7	DNA-directed DNA polymerase.	Deoxynucleoside triphosphate + DNA(n) = diphosphate + DNA(n+1).	Control
110676061	Clostridium perfringens ATCC 13124	2.7.7.7	DNA-directed DNA polymerase.	Deoxynucleoside triphosphate + DNA(n) = diphosphate + DNA(n+1).	Autism
291516108	Alistipes shahii WAL 8301	2.7.7.7	DNA-directed DNA polymerase.	Deoxynucleoside triphosphate + DNA(n) = diphosphate + DNA(n+1).	Control
110676061	Clostridium perfringens ATCC 13124	2.7.7.7	DNA-directed DNA polymerase.	Deoxynucleoside triphosphate + DNA(n) = diphosphate + DNA(n+1).	Autism
291516108	Alistipes shahii WAL 8301	2.7.7.7	DNA-directed DNA polymerase.	Deoxynucleoside triphosphate + DNA(n) = diphosphate + DNA(n+1).	Control
219869941	Desulfovibrio desulfuricans ATCC 27774	2.7.7.7	DNA-directed DNA polymerase.	Deoxynucleoside triphosphate + DNA(n) = diphosphate + DNA(n+1).	Autism
291516108	Alistipes shahii WAL 8301	2.7.7.7	DNA-directed DNA polymerase.	Deoxynucleoside triphosphate + DNA(n) = diphosphate + DNA(n+1).	Control
219869941	Desulfovibrio desulfuricans ATCC 27774	2.7.7.7	DNA-directed DNA polymerase.	Deoxynucleoside triphosphate + DNA(n) = diphosphate + DNA(n+1).	Autism
291516108	Alistipes shahii WAL 8301	2.7.7.7	DNA-directed DNA polymerase.	Deoxynucleoside triphosphate + DNA(n) = diphosphate + DNA(n+1).	Control
219869941	Desulfovibrio desulfuricans ATCC 27774	2.7.7.7	DNA-directed DNA polymerase.	Deoxynucleoside triphosphate + DNA(n) = diphosphate + DNA(n+1).	Autism
291516108	Alistipes shahii WAL 8301	2.7.7.7	DNA-directed DNA polymerase.	Deoxynucleoside triphosphate + DNA(n) = diphosphate + DNA(n+1).	Control
219869941	Desulfovibrio desulfuricans ATCC 27774	2.7.7.7	DNA-directed DNA polymerase.	Deoxynucleoside triphosphate + DNA(n) = diphosphate + DNA(n+1).	Autism
291516108	Alistipes shahii WAL 8301	2.7.7.7	DNA-directed DNA polymerase.	Deoxynucleoside triphosphate + DNA(n) = diphosphate + DNA(n+1).	Control
219869941	Desulfovibrio desulfuricans ATCC 27774	2.7.7.7	DNA-directed DNA polymerase.	Deoxynucleoside triphosphate + DNA(n) = diphosphate + DNA(n+1).	Autism
291516108	Alistipes shahii WAL 8301	2.7.7.7	DNA-directed DNA polymerase.	Deoxynucleoside triphosphate + DNA(n) = diphosphate + DNA(n+1).	Control
115252745	Peptoclostridium difficile 630	2.7.7.7	DNA-directed DNA polymerase.	Deoxynucleoside triphosphate + DNA(n) = diphosphate + DNA(n+1).	Autism
291516108	Alistipes shahii WAL 8301	2.7.7.7	DNA-directed DNA polymerase.	Deoxynucleoside triphosphate + DNA(n) = diphosphate + DNA(n+1).	Control
115252745	Peptoclostridium difficile 630	2.7.7.7	DNA-directed DNA polymerase.	Deoxynucleoside triphosphate + DNA(n) = diphosphate + DNA(n+1).	Autism
291516108	Alistipes shahii WAL 8301	2.7.7.7	DNA-directed DNA polymerase.	Deoxynucleoside triphosphate + DNA(n) = diphosphate + DNA(n+1).	Control
115252745	Peptoclostridium difficile 630	2.7.7.7	DNA-directed DNA polymerase.	Deoxynucleoside triphosphate + DNA(n) = diphosphate + DNA(n+1).	Autism
291516108	Alistipes shahii WAL 8301	2.7.7.7	DNA-directed DNA polymerase.	Deoxynucleoside triphosphate + DNA(n) = diphosphate + DNA(n+1).	Control
115252745	Peptoclostridium difficile 630	2.7.7.7	DNA-directed DNA polymerase.	Deoxynucleoside triphosphate + DNA(n) = diphosphate + DNA(n+1).	Autism
291516108	Alistipes shahii WAL 8301	2.7.7.7	DNA-directed DNA polymerase.	Deoxynucleoside triphosphate + DNA(n) = diphosphate + DNA(n+1).	Control
115252745	Peptoclostridium difficile 630	2.7.7.7	DNA-directed DNA polymerase.	Deoxynucleoside triphosphate + DNA(n) = diphosphate + DNA(n+1).	Autism
291516108	Alistipes shahii WAL 8301	2.7.7.7	DNA-directed DNA polymerase.	Deoxynucleoside triphosphate + DNA(n) = diphosphate + DNA(n+1).	Control
115252745	Peptoclostridium difficile 630	2.7.7.7	DNA-directed DNA polymerase.	Deoxynucleoside triphosphate + DNA(n) = diphosphate + DNA(n+1).	Autism
291516108	Alistipes shahii WAL 8301	2.7.7.7	DNA-directed DNA polymerase.	Deoxynucleoside triphosphate + DNA(n) = diphosphate + DNA(n+1).	Control
115252745	Peptoclostridium difficile 630	2.7.7.7	DNA-directed DNA polymerase.	Deoxynucleoside triphosphate + DNA(n) = diphosphate + DNA(n+1).	Autism
291516108	Alistipes shahii WAL 8301	2.7.7.7	DNA-directed DNA polymerase.	Deoxynucleoside triphosphate + DNA(n) = diphosphate + DNA(n+1).	Control
115252745	Peptoclostridium difficile 630	2.7.7.7	DNA-directed DNA polymerase.	Deoxynucleoside triphosphate + DNA(n) = diphosphate + DNA(n+1).	Autism
291516108	Alistipes shahii WAL 8301	3.5.4.16	GTP cyclohydrolase I.	GTP + H(2)O = formate + 2-amino-4-hydroxy-6-(erythro-1,2,3-trihydroxypropyl)-dihydropteridine triphosphate.	Control
110676061	Clostridium perfringens ATCC 13124	3.5.4.16	GTP cyclohydrolase I.	GTP + H(2)O = formate + 2-amino-4-hydroxy-6-(erythro-1,2,3-trihydroxypropyl)-dihydropteridine triphosphate.	Autism
291516108	Alistipes shahii WAL 8301	3.5.4.16	GTP cyclohydrolase I.	GTP + H(2)O = formate + 2-amino-4-hydroxy-6-(erythro-1,2,3-trihydroxypropyl)-dihydropteridine triphosphate.	Control
115252745	Peptoclostridium difficile 630	3.5.4.16	GTP cyclohydrolase I.	GTP + H(2)O = formate + 2-amino-4-hydroxy-6-(erythro-1,2,3-trihydroxypropyl)-dihydropteridine triphosphate.	Autism
291516108	Alistipes shahii WAL 8301	3.6.1.15	Nucleoside-triphosphate phosphatase.	NTP + H(2)O = NDP + phosphate.	Control
115252745	Peptoclostridium difficile 630	3.6.1.15	Nucleoside-triphosphate phosphatase.	NTP + H(2)O = NDP + phosphate.	Autism
291516108	Alistipes shahii WAL 8301	3.1.26.4	Ribonuclease H.	Endonucleolytic cleavage to 5'-phosphomonoester.	Control
187426706	Akkermansia muciniphila ATCC BAA-835	3.1.26.4	Ribonuclease H.	Endonucleolytic cleavage to 5'-phosphomonoester.	Autism
291516108	Alistipes shahii WAL 8301	3.1.26.4	Ribonuclease H.	Endonucleolytic cleavage to 5'-phosphomonoester.	Control
110676061	Clostridium perfringens ATCC 13124	3.1.26.4	Ribonuclease H.	Endonucleolytic cleavage to 5'-phosphomonoester.	Autism
291516108	Alistipes shahii WAL 8301	3.1.26.4	Ribonuclease H.	Endonucleolytic cleavage to 5'-phosphomonoester.	Control
219869941	Desulfovibrio desulfuricans ATCC 27774	3.1.26.4	Ribonuclease H.	Endonucleolytic cleavage to 5'-phosphomonoester.	Autism
291516108	Alistipes shahii WAL 8301	3.1.26.4	Ribonuclease H.	Endonucleolytic cleavage to 5'-phosphomonoester.	Control
219869941	Desulfovibrio desulfuricans ATCC 27774	3.1.26.4	Ribonuclease H.	Endonucleolytic cleavage to 5'-phosphomonoester.	Autism
291516108	Alistipes shahii WAL 8301	3.1.26.4	Ribonuclease H.	Endonucleolytic cleavage to 5'-phosphomonoester.	Control
115252745	Peptoclostridium difficile 630	3.1.26.4	Ribonuclease H.	Endonucleolytic cleavage to 5'-phosphomonoester.	Autism
291516108	Alistipes shahii WAL 8301	3.5.1.1	Asparaginase.	L-asparagine + H(2)O = L-aspartate + NH(3).	Control
110676061	Clostridium perfringens ATCC 13124	3.5.1.1	Asparaginase.	L-asparagine + H(2)O = L-aspartate + NH(3).	Autism
291516108	Alistipes shahii WAL 8301	3.5.1.1	Asparaginase.	L-asparagine + H(2)O = L-aspartate + NH(3).	Control
219869941	Desulfovibrio desulfuricans ATCC 27774	3.5.1.1	Asparaginase.	L-asparagine + H(2)O = L-aspartate + NH(3).	Autism
291516108	Alistipes shahii WAL 8301	3.5.1.1	Asparaginase.	L-asparagine + H(2)O = L-aspartate + NH(3).	Control
115252745	Peptoclostridium difficile 630	3.5.1.1	Asparaginase.	L-asparagine + H(2)O = L-aspartate + NH(3).	Autism
291516108	Alistipes shahii WAL 8301	3.1.21.3	Type I site-specific deoxyribonuclease.	Endonucleolytic cleavage of DNA to give random double-stranded fragmentswith terminal 5'-phosphates; ATP is simultaneously hydrolyzed.	Control
110676061	Clostridium perfringens ATCC 13124	3.1.21.3	Type I site-specific deoxyribonuclease.	Endonucleolytic cleavage of DNA to give random double-stranded fragmentswith terminal 5'-phosphates; ATP is simultaneously hydrolyzed.	Autism
291516108	Alistipes shahii WAL 8301	3.1.21.3	Type I site-specific deoxyribonuclease.	Endonucleolytic cleavage of DNA to give random double-stranded fragmentswith terminal 5'-phosphates; ATP is simultaneously hydrolyzed.	Control
110676061	Clostridium perfringens ATCC 13124	3.1.21.3	Type I site-specific deoxyribonuclease.	Endonucleolytic cleavage of DNA to give random double-stranded fragmentswith terminal 5'-phosphates; ATP is simultaneously hydrolyzed.	Autism
291516108	Alistipes shahii WAL 8301	3.1.21.3	Type I site-specific deoxyribonuclease.	Endonucleolytic cleavage of DNA to give random double-stranded fragmentswith terminal 5'-phosphates; ATP is simultaneously hydrolyzed.	Control
110676061	Clostridium perfringens ATCC 13124	3.1.21.3	Type I site-specific deoxyribonuclease.	Endonucleolytic cleavage of DNA to give random double-stranded fragmentswith terminal 5'-phosphates; ATP is simultaneously hydrolyzed.	Autism
291516108	Alistipes shahii WAL 8301	3.1.21.3	Type I site-specific deoxyribonuclease.	Endonucleolytic cleavage of DNA to give random double-stranded fragmentswith terminal 5'-phosphates; ATP is simultaneously hydrolyzed.	Control
110676061	Clostridium perfringens ATCC 13124	3.1.21.3	Type I site-specific deoxyribonuclease.	Endonucleolytic cleavage of DNA to give random double-stranded fragmentswith terminal 5'-phosphates; ATP is simultaneously hydrolyzed.	Autism
291516108	Alistipes shahii WAL 8301	2.1.1.72	Site-specific DNA-methyltransferase (adenine-specific).	S-adenosyl-L-methionine + DNA adenine = S-adenosyl-L-homocysteine +DNA 6-methylaminopurine.	Control
187426706	Akkermansia muciniphila ATCC BAA-835	2.1.1.72	Site-specific DNA-methyltransferase (adenine-specific).	S-adenosyl-L-methionine + DNA adenine = S-adenosyl-L-homocysteine +DNA 6-methylaminopurine.	Autism
291516108	Alistipes shahii WAL 8301	2.1.1.72	Site-specific DNA-methyltransferase (adenine-specific).	S-adenosyl-L-methionine + DNA adenine = S-adenosyl-L-homocysteine +DNA 6-methylaminopurine.	Control
110676061	Clostridium perfringens ATCC 13124	2.1.1.72	Site-specific DNA-methyltransferase (adenine-specific).	S-adenosyl-L-methionine + DNA adenine = S-adenosyl-L-homocysteine +DNA 6-methylaminopurine.	Autism
291516108	Alistipes shahii WAL 8301	2.1.1.72	Site-specific DNA-methyltransferase (adenine-specific).	S-adenosyl-L-methionine + DNA adenine = S-adenosyl-L-homocysteine +DNA 6-methylaminopurine.	Control
115252745	Peptoclostridium difficile 630	2.1.1.72	Site-specific DNA-methyltransferase (adenine-specific).	S-adenosyl-L-methionine + DNA adenine = S-adenosyl-L-homocysteine +DNA 6-methylaminopurine.	Autism
291516108	Alistipes shahii WAL 8301	3.2.1.22	Alpha-galactosidase.	Hydrolysis of terminal, non-reducing alpha-D-galactose residues in alpha-D-galactosides, including galactose oligosaccharides, galactomannans andgalactolipids.	Control
[truncated: 38,950 more rows]

## Sheet: Table S3-Query1 Filtered Data
Table S3. Query1 Filtered Data.
Unique Control Enzymes of Interest
GI Accession	Organism Name	EC_number	Enzyme Name	Biochemistry	Microbiome Name
291516108	Alistipes shahii WAL 8301	2.6.1.11	Acetylornithine transaminase.	N(2)-acetyl-L-ornithine + 2-oxoglutarate = N-acetyl-L-glutamate5-semialdehyde + L-glutamate.	Control
291516108	Alistipes shahii WAL 8301	2.6.1.11	Acetylornithine transaminase.	N(2)-acetyl-L-ornithine + 2-oxoglutarate = N-acetyl-L-glutamate5-semialdehyde + L-glutamate.	Control
60495220	Bacteroides fragilis ATCC 25285 = NCTC 93	2.6.1.11	Acetylornithine transaminase.	N(2)-acetyl-L-ornithine + 2-oxoglutarate = N-acetyl-L-glutamate5-semialdehyde + L-glutamate.	Control
291526581	Eubacterium rectale DSM 17629	2.6.1.11	Acetylornithine transaminase.	N(2)-acetyl-L-ornithine + 2-oxoglutarate = N-acetyl-L-glutamate5-semialdehyde + L-glutamate.	Control
291526581	Eubacterium rectale DSM 17629	2.6.1.11	Acetylornithine transaminase.	N(2)-acetyl-L-ornithine + 2-oxoglutarate = N-acetyl-L-glutamate5-semialdehyde + L-glutamate.	Control
295102938	Faecalibacterium prausnitzii L2/6	2.6.1.11	Acetylornithine transaminase.	N(2)-acetyl-L-ornithine + 2-oxoglutarate = N-acetyl-L-glutamate5-semialdehyde + L-glutamate.	Control
148552872	Methanobrevibacter smithii ATCC 35061; PS; DSMZ	2.6.1.11	Acetylornithine transaminase.	N(2)-acetyl-L-ornithine + 2-oxoglutarate = N-acetyl-L-glutamate5-semialdehyde + L-glutamate.	Control
324314063	Odoribacter splanchnicus DSM 220712	2.6.1.11	Acetylornithine transaminase.	N(2)-acetyl-L-ornithine + 2-oxoglutarate = N-acetyl-L-glutamate5-semialdehyde + L-glutamate.	Control
294473972	Prevotella ruminicola Bryant 23	2.6.1.11	Acetylornithine transaminase.	N(2)-acetyl-L-ornithine + 2-oxoglutarate = N-acetyl-L-glutamate5-semialdehyde + L-glutamate.	Control
291541371	Roseburia intestinalis XB6B4	2.6.1.11	Acetylornithine transaminase.	N(2)-acetyl-L-ornithine + 2-oxoglutarate = N-acetyl-L-glutamate5-semialdehyde + L-glutamate.	Control
167660682	Alistipes putredinis DSM 17216	2.6.1.52	Phosphoserine transaminase.	(1) O-phospho-L-serine + 2-oxoglutarate = 3-phosphonooxypyruvate +L-glutamate.(2) 4-phosphonooxy-L-threonine + 2-oxoglutarate = (3R)-3-hydroxy-2-oxo-4-phosphonooxybutanoate + L-glutamate.	Control
291516108	Alistipes shahii WAL 8301	2.6.1.52	Phosphoserine transaminase.	(1) O-phospho-L-serine + 2-oxoglutarate = 3-phosphonooxypyruvate +L-glutamate.(2) 4-phosphonooxy-L-threonine + 2-oxoglutarate = (3R)-3-hydroxy-2-oxo-4-phosphonooxybutanoate + L-glutamate.	Control
60495220	Bacteroides fragilis ATCC 25285 = NCTC 93	2.6.1.52	Phosphoserine transaminase.	(1) O-phospho-L-serine + 2-oxoglutarate = 3-phosphonooxypyruvate +L-glutamate.(2) 4-phosphonooxy-L-threonine + 2-oxoglutarate = (3R)-3-hydroxy-2-oxo-4-phosphonooxybutanoate + L-glutamate.	Control
295102938	Faecalibacterium prausnitzii L2/6	2.6.1.52	Phosphoserine transaminase.	(1) O-phospho-L-serine + 2-oxoglutarate = 3-phosphonooxypyruvate +L-glutamate.(2) 4-phosphonooxy-L-threonine + 2-oxoglutarate = (3R)-3-hydroxy-2-oxo-4-phosphonooxybutanoate + L-glutamate.	Control
324314063	Odoribacter splanchnicus DSM 220712	2.6.1.52	Phosphoserine transaminase.	(1) O-phospho-L-serine + 2-oxoglutarate = 3-phosphonooxypyruvate +L-glutamate.(2) 4-phosphonooxy-L-threonine + 2-oxoglutarate = (3R)-3-hydroxy-2-oxo-4-phosphonooxybutanoate + L-glutamate.	Control
294473972	Prevotella ruminicola Bryant 23	2.6.1.52	Phosphoserine transaminase.	(1) O-phospho-L-serine + 2-oxoglutarate = 3-phosphonooxypyruvate +L-glutamate.(2) 4-phosphonooxy-L-threonine + 2-oxoglutarate = (3R)-3-hydroxy-2-oxo-4-phosphonooxybutanoate + L-glutamate.	Control
291541371	Roseburia intestinalis XB6B4	2.6.1.52	Phosphoserine transaminase.	(1) O-phospho-L-serine + 2-oxoglutarate = 3-phosphonooxypyruvate +L-glutamate.(2) 4-phosphonooxy-L-threonine + 2-oxoglutarate = (3R)-3-hydroxy-2-oxo-4-phosphonooxybutanoate + L-glutamate.	Control
291543183	Ruminococcus bromii L2-63	2.6.1.52	Phosphoserine transaminase.	(1) O-phospho-L-serine + 2-oxoglutarate = 3-phosphonooxypyruvate +L-glutamate.(2) 4-phosphonooxy-L-threonine + 2-oxoglutarate = (3R)-3-hydroxy-2-oxo-4-phosphonooxybutanoate + L-glutamate.	Control
291516108	Alistipes shahii WAL 8301	1.2.7.3	2-oxoglutarate synthase.	2-oxoglutarate + CoA + 2 oxidized ferredoxin = succinyl-CoA + CO(2) +2 reduced ferredoxin + 2 H(+).	Control
291516108	Alistipes shahii WAL 8301	1.2.7.3	2-oxoglutarate synthase.	2-oxoglutarate + CoA + 2 oxidized ferredoxin = succinyl-CoA + CO(2) +2 reduced ferredoxin + 2 H(+).	Control
291516108	Alistipes shahii WAL 8301	1.2.7.3	2-oxoglutarate synthase.	2-oxoglutarate + CoA + 2 oxidized ferredoxin = succinyl-CoA + CO(2) +2 reduced ferredoxin + 2 H(+).	Control
291516108	Alistipes shahii WAL 8301	1.2.7.3	2-oxoglutarate synthase.	2-oxoglutarate + CoA + 2 oxidized ferredoxin = succinyl-CoA + CO(2) +2 reduced ferredoxin + 2 H(+).	Control
291516108	Alistipes shahii WAL 8301	1.2.7.3	2-oxoglutarate synthase.	2-oxoglutarate + CoA + 2 oxidized ferredoxin = succinyl-CoA + CO(2) +2 reduced ferredoxin + 2 H(+).	Control
148552872	Methanobrevibacter smithii ATCC 35061; PS; DSMZ	1.2.7.3	2-oxoglutarate synthase.	2-oxoglutarate + CoA + 2 oxidized ferredoxin = succinyl-CoA + CO(2) +2 reduced ferredoxin + 2 H(+).	Control
148552872	Methanobrevibacter smithii ATCC 35061; PS; DSMZ	1.2.7.3	2-oxoglutarate synthase.	2-oxoglutarate + CoA + 2 oxidized ferredoxin = succinyl-CoA + CO(2) +2 reduced ferredoxin + 2 H(+).	Control
148552872	Methanobrevibacter smithii ATCC 35061; PS; DSMZ	1.2.7.3	2-oxoglutarate synthase.	2-oxoglutarate + CoA + 2 oxidized ferredoxin = succinyl-CoA + CO(2) +2 reduced ferredoxin + 2 H(+).	Control
148552872	Methanobrevibacter smithii ATCC 35061; PS; DSMZ	1.2.7.3	2-oxoglutarate synthase.	2-oxoglutarate + CoA + 2 oxidized ferredoxin = succinyl-CoA + CO(2) +2 reduced ferredoxin + 2 H(+).	Control
148552872	Methanobrevibacter smithii ATCC 35061; PS; DSMZ	1.2.7.3	2-oxoglutarate synthase.	2-oxoglutarate + CoA + 2 oxidized ferredoxin = succinyl-CoA + CO(2) +2 reduced ferredoxin + 2 H(+).	Control
324314063	Odoribacter splanchnicus DSM 220712	1.2.7.3	2-oxoglutarate synthase.	2-oxoglutarate + CoA + 2 oxidized ferredoxin = succinyl-CoA + CO(2) +2 reduced ferredoxin + 2 H(+).	Control
324314063	Odoribacter splanchnicus DSM 220712	1.2.7.3	2-oxoglutarate synthase.	2-oxoglutarate + CoA + 2 oxidized ferredoxin = succinyl-CoA + CO(2) +2 reduced ferredoxin + 2 H(+).	Control
324314063	Odoribacter splanchnicus DSM 220712	1.2.7.3	2-oxoglutarate synthase.	2-oxoglutarate + CoA + 2 oxidized ferredoxin = succinyl-CoA + CO(2) +2 reduced ferredoxin + 2 H(+).	Control
167660682	Alistipes putredinis DSM 17216	1.4.1.1	Alanine dehydrogenase.	L-alanine + H(2)O + NAD(+) = pyruvate + NH(3) + NADH.	Control
291516108	Alistipes shahii WAL 8301	1.4.1.1	Alanine dehydrogenase.	L-alanine + H(2)O + NAD(+) = pyruvate + NH(3) + NADH.	Control
60495220	Bacteroides fragilis ATCC 25285 = NCTC 93	1.4.1.1	Alanine dehydrogenase.	L-alanine + H(2)O + NAD(+) = pyruvate + NH(3) + NADH.	Control
324314063	Odoribacter splanchnicus DSM 220712	1.4.1.1	Alanine dehydrogenase.	L-alanine + H(2)O + NAD(+) = pyruvate + NH(3) + NADH.	Control
294473972	Prevotella ruminicola Bryant 23	1.4.1.1	Alanine dehydrogenase.	L-alanine + H(2)O + NAD(+) = pyruvate + NH(3) + NADH.	Control
291516108	Alistipes shahii WAL 8301	4.3.1.3	Histidine ammonia-lyase.	L-histidine = urocanate + NH(3).	Control
60495220	Bacteroides fragilis ATCC 25285 = NCTC 93	4.3.1.3	Histidine ammonia-lyase.	L-histidine = urocanate + NH(3).	Control
324314063	Odoribacter splanchnicus DSM 220712	4.3.1.3	Histidine ammonia-lyase.	L-histidine = urocanate + NH(3).	Control
60495220	Bacteroides fragilis ATCC 25285 = NCTC 93	2.1.2.5	Glutamate formimidoyltransferase.	(1) 5-formimidoyltetrahydrofolate + L-glutamate = tetrahydrofolate +N-formimidoyl-L-glutamate.(2) 5-formyltetrahydrofolate + L-glutamate = tetrahydrofolate + N-formyl-L-glutamate.	Control
324314063	Odoribacter splanchnicus DSM 220712	2.1.2.5	Glutamate formimidoyltransferase.	(1) 5-formimidoyltetrahydrofolate + L-glutamate = tetrahydrofolate +N-formimidoyl-L-glutamate.(2) 5-formyltetrahydrofolate + L-glutamate = tetrahydrofolate + N-formyl-L-glutamate.	Control
291516108	Alistipes shahii WAL 8301	4.3.1.1	Aspartate ammonia-lyase.	L-aspartate = fumarate + NH(3).	Control
60495220	Bacteroides fragilis ATCC 25285 = NCTC 93	4.3.1.1	Aspartate ammonia-lyase.	L-aspartate = fumarate + NH(3).	Control
666001751	Bifidobacterium longum BXY01	4.3.1.1	Aspartate ammonia-lyase.	L-aspartate = fumarate + NH(3).	Control
324314063	Odoribacter splanchnicus DSM 220712	4.3.1.1	Aspartate ammonia-lyase.	L-aspartate = fumarate + NH(3).	Control
666001751	Bifidobacterium longum BXY01	2.6.1.2	Alanine transaminase.	L-alanine + 2-oxoglutarate = pyruvate + L-glutamate.	Control
291526581	Eubacterium rectale DSM 17629	3.1.3.73	Adenosylcobalamin/alpha-ribazole phosphatase.	(1) Adenosylcobalamin 5'-phosphate + H(2)O = coenzyme B12 + phosphate.(2) Alpha-ribazole 5'-phosphate + H(2)O = alpha-ribazole + phosphate.	Control
291526581	Eubacterium rectale DSM 17629	3.1.3.73	Adenosylcobalamin/alpha-ribazole phosphatase.	(1) Adenosylcobalamin 5'-phosphate + H(2)O = coenzyme B12 + phosphate.(2) Alpha-ribazole 5'-phosphate + H(2)O = alpha-ribazole + phosphate.	Control
295102938	Faecalibacterium prausnitzii L2/6	3.1.3.73	Adenosylcobalamin/alpha-ribazole phosphatase.	(1) Adenosylcobalamin 5'-phosphate + H(2)O = coenzyme B12 + phosphate.(2) Alpha-ribazole 5'-phosphate + H(2)O = alpha-ribazole + phosphate.	Control
295102938	Faecalibacterium prausnitzii L2/6	3.1.3.73	Adenosylcobalamin/alpha-ribazole phosphatase.	(1) Adenosylcobalamin 5'-phosphate + H(2)O = coenzyme B12 + phosphate.(2) Alpha-ribazole 5'-phosphate + H(2)O = alpha-ribazole + phosphate.	Control
291541371	Roseburia intestinalis XB6B4	3.1.3.73	Adenosylcobalamin/alpha-ribazole phosphatase.	(1) Adenosylcobalamin 5'-phosphate + H(2)O = coenzyme B12 + phosphate.(2) Alpha-ribazole 5'-phosphate + H(2)O = alpha-ribazole + phosphate.	Control
291541371	Roseburia intestinalis XB6B4	3.1.3.73	Adenosylcobalamin/alpha-ribazole phosphatase.	(1) Adenosylcobalamin 5'-phosphate + H(2)O = coenzyme B12 + phosphate.(2) Alpha-ribazole 5'-phosphate + H(2)O = alpha-ribazole + phosphate.	Control
291543183	Ruminococcus bromii L2-63	3.1.3.73	Adenosylcobalamin/alpha-ribazole phosphatase.	(1) Adenosylcobalamin 5'-phosphate + H(2)O = coenzyme B12 + phosphate.(2) Alpha-ribazole 5'-phosphate + H(2)O = alpha-ribazole + phosphate.	Control
291526581	Eubacterium rectale DSM 17629	1.4.1.14	Glutamate synthase (NADH).	2 L-glutamate + NAD(+) = L-glutamine + 2-oxoglutarate + NADH.	Control
291526581	Eubacterium rectale DSM 17629	1.4.1.14	Glutamate synthase (NADH).	2 L-glutamate + NAD(+) = L-glutamine + 2-oxoglutarate + NADH.	Control
291526581	Eubacterium rectale DSM 17629	1.4.1.14	Glutamate synthase (NADH).	2 L-glutamate + NAD(+) = L-glutamine + 2-oxoglutarate + NADH.	Control
295102938	Faecalibacterium prausnitzii L2/6	1.4.1.14	Glutamate synthase (NADH).	2 L-glutamate + NAD(+) = L-glutamine + 2-oxoglutarate + NADH.	Control
295102938	Faecalibacterium prausnitzii L2/6	1.4.1.14	Glutamate synthase (NADH).	2 L-glutamate + NAD(+) = L-glutamine + 2-oxoglutarate + NADH.	Control
295102938	Faecalibacterium prausnitzii L2/6	1.4.1.14	Glutamate synthase (NADH).	2 L-glutamate + NAD(+) = L-glutamine + 2-oxoglutarate + NADH.	Control
295102938	Faecalibacterium prausnitzii L2/6	1.4.1.14	Glutamate synthase (NADH).	2 L-glutamate + NAD(+) = L-glutamine + 2-oxoglutarate + NADH.	Control
291541371	Roseburia intestinalis XB6B4	1.4.1.14	Glutamate synthase (NADH).	2 L-glutamate + NAD(+) = L-glutamine + 2-oxoglutarate + NADH.	Control
291541371	Roseburia intestinalis XB6B4	1.4.1.14	Glutamate synthase (NADH).	2 L-glutamate + NAD(+) = L-glutamine + 2-oxoglutarate + NADH.	Control
291541371	Roseburia intestinalis XB6B4	1.4.1.14	Glutamate synthase (NADH).	2 L-glutamate + NAD(+) = L-glutamine + 2-oxoglutarate + NADH.	Control
291543183	Ruminococcus bromii L2-63	1.4.1.14	Glutamate synthase (NADH).	2 L-glutamate + NAD(+) = L-glutamine + 2-oxoglutarate + NADH.	Control
291543183	Ruminococcus bromii L2-63	1.4.1.14	Glutamate synthase (NADH).	2 L-glutamate + NAD(+) = L-glutamine + 2-oxoglutarate + NADH.	Control
291543183	Ruminococcus bromii L2-63	1.4.1.14	Glutamate synthase (NADH).	2 L-glutamate + NAD(+) = L-glutamine + 2-oxoglutarate + NADH.	Control
291526581	Eubacterium rectale DSM 17629	6.3.5.7	Glutaminyl-tRNA synthase (glutamine-hydrolyzing).	ATP + L-glutamyl-tRNA(Gln) + L-glutamine = ADP + phosphate +L-glutaminyl-tRNA(Gln) + L-glutamate.	Control
291526581	Eubacterium rectale DSM 17629	6.3.5.7	Glutaminyl-tRNA synthase (glutamine-hydrolyzing).	ATP + L-glutamyl-tRNA(Gln) + L-glutamine = ADP + phosphate +L-glutaminyl-tRNA(Gln) + L-glutamate.	Control
291526581	Eubacterium rectale DSM 17629	6.3.5.7	Glutaminyl-tRNA synthase (glutamine-hydrolyzing).	ATP + L-glutamyl-tRNA(Gln) + L-glutamine = ADP + phosphate +L-glutaminyl-tRNA(Gln) + L-glutamate.	Control
488447870	Lactobacillus acidophilus La-14	6.3.5.7	Glutaminyl-tRNA synthase (glutamine-hydrolyzing).	ATP + L-glutamyl-tRNA(Gln) + L-glutamine = ADP + phosphate +L-glutaminyl-tRNA(Gln) + L-glutamate.	Control
488447870	Lactobacillus acidophilus La-14	6.3.5.7	Glutaminyl-tRNA synthase (glutamine-hydrolyzing).	ATP + L-glutamyl-tRNA(Gln) + L-glutamine = ADP + phosphate +L-glutaminyl-tRNA(Gln) + L-glutamate.	Control
488447870	Lactobacillus acidophilus La-14	6.3.5.7	Glutaminyl-tRNA synthase (glutamine-hydrolyzing).	ATP + L-glutamyl-tRNA(Gln) + L-glutamine = ADP + phosphate +L-glutaminyl-tRNA(Gln) + L-glutamate.	Control
291541371	Roseburia intestinalis XB6B4	6.3.5.7	Glutaminyl-tRNA synthase (glutamine-hydrolyzing).	ATP + L-glutamyl-tRNA(Gln) + L-glutamine = ADP + phosphate +L-glutaminyl-tRNA(Gln) + L-glutamate.	Control
291541371	Roseburia intestinalis XB6B4	6.3.5.7	Glutaminyl-tRNA synthase (glutamine-hydrolyzing).	ATP + L-glutamyl-tRNA(Gln) + L-glutamine = ADP + phosphate +L-glutaminyl-tRNA(Gln) + L-glutamate.	Control
291543183	Ruminococcus bromii L2-63	6.3.5.7	Glutaminyl-tRNA synthase (glutamine-hydrolyzing).	ATP + L-glutamyl-tRNA(Gln) + L-glutamine = ADP + phosphate +L-glutaminyl-tRNA(Gln) + L-glutamate.	Control
291543183	Ruminococcus bromii L2-63	6.3.5.7	Glutaminyl-tRNA synthase (glutamine-hydrolyzing).	ATP + L-glutamyl-tRNA(Gln) + L-glutamine = ADP + phosphate +L-glutaminyl-tRNA(Gln) + L-glutamate.	Control
291526581	Eubacterium rectale DSM 17629	6.3.5.6	Asparaginyl-tRNA synthase (glutamine-hydrolyzing).	ATP + L-aspartyl-tRNA(Asn) + L-glutamine + H(2)O = ADP + phosphate +L-asparaginyl-tRNA(Asn) + L-glutamate.	Control
291526581	Eubacterium rectale DSM 17629	6.3.5.6	Asparaginyl-tRNA synthase (glutamine-hydrolyzing).	ATP + L-aspartyl-tRNA(Asn) + L-glutamine + H(2)O = ADP + phosphate +L-asparaginyl-tRNA(Asn) + L-glutamate.	Control
291526581	Eubacterium rectale DSM 17629	6.3.5.6	Asparaginyl-tRNA synthase (glutamine-hydrolyzing).	ATP + L-aspartyl-tRNA(Asn) + L-glutamine + H(2)O = ADP + phosphate +L-asparaginyl-tRNA(Asn) + L-glutamate.	Control
488447870	Lactobacillus acidophilus La-14	6.3.5.6	Asparaginyl-tRNA synthase (glutamine-hydrolyzing).	ATP + L-aspartyl-tRNA(Asn) + L-glutamine + H(2)O = ADP + phosphate +L-asparaginyl-tRNA(Asn) + L-glutamate.	Control
488447870	Lactobacillus acidophilus La-14	6.3.5.6	Asparaginyl-tRNA synthase (glutamine-hydrolyzing).	ATP + L-aspartyl-tRNA(Asn) + L-glutamine + H(2)O = ADP + phosphate +L-asparaginyl-tRNA(Asn) + L-glutamate.	Control
488447870	Lactobacillus acidophilus La-14	6.3.5.6	Asparaginyl-tRNA synthase (glutamine-hydrolyzing).	ATP + L-aspartyl-tRNA(Asn) + L-glutamine + H(2)O = ADP + phosphate +L-asparaginyl-tRNA(Asn) + L-glutamate.	Control
291541371	Roseburia intestinalis XB6B4	6.3.5.6	Asparaginyl-tRNA synthase (glutamine-hydrolyzing).	ATP + L-aspartyl-tRNA(Asn) + L-glutamine + H(2)O = ADP + phosphate +L-asparaginyl-tRNA(Asn) + L-glutamate.	Control
291541371	Roseburia intestinalis XB6B4	6.3.5.6	Asparaginyl-tRNA synthase (glutamine-hydrolyzing).	ATP + L-aspartyl-tRNA(Asn) + L-glutamine + H(2)O = ADP + phosphate +L-asparaginyl-tRNA(Asn) + L-glutamate.	Control
291543183	Ruminococcus bromii L2-63	6.3.5.6	Asparaginyl-tRNA synthase (glutamine-hydrolyzing).	ATP + L-aspartyl-tRNA(Asn) + L-glutamine + H(2)O = ADP + phosphate +L-asparaginyl-tRNA(Asn) + L-glutamate.	Control
291543183	Ruminococcus bromii L2-63	6.3.5.6	Asparaginyl-tRNA synthase (glutamine-hydrolyzing).	ATP + L-aspartyl-tRNA(Asn) + L-glutamine + H(2)O = ADP + phosphate +L-asparaginyl-tRNA(Asn) + L-glutamate.	Control
291526581	Eubacterium rectale DSM 17629	1.8.99.2	Adenylyl-sulfate reductase.	AMP + sulfite + acceptor = adenylyl sulfate + reduced acceptor.	Control
291543183	Ruminococcus bromii L2-63	1.8.99.2	Adenylyl-sulfate reductase.	AMP + sulfite + acceptor = adenylyl sulfate + reduced acceptor.	Control
291526581	Eubacterium rectale DSM 17629	2.6.1.17	Succinyldiaminopimelate transaminase.	N-succinyl-L-2,6-diaminoheptanedioate + 2-oxoglutarate = N-succinyl-2-L-amino-6-oxoheptanedioate + L-glutamate.	Control
295102938	Faecalibacterium prausnitzii L2/6	2.6.1.17	Succinyldiaminopimelate transaminase.	N-succinyl-L-2,6-diaminoheptanedioate + 2-oxoglutarate = N-succinyl-2-L-amino-6-oxoheptanedioate + L-glutamate.	Control
295102938	Faecalibacterium prausnitzii L2/6	1.15.1.2	Superoxide reductase.	Reduced rubredoxin + superoxide + 2 H(+) = rubredoxin + H(2)O(2).	Control
295102938	Faecalibacterium prausnitzii L2/6	2.1.1.64	3-demethylubiquinol 3-O-methyltransferase.	S-adenosyl-L-methionine + 3-demethylubiquinone-n = S-adenosyl-L-homocysteine + ubiquinone-n.	Control
488447870	Lactobacillus acidophilus La-14	6.1.1.24	Glutamate--tRNA(Gln) ligase.	ATP + L-glutamate + tRNA(Glx) = AMP + diphosphate + L-glutamyl-tRNA(Glx).	Control
488447870	Lactobacillus acidophilus La-14	2.1.1.207	tRNA (cytidine(34)-2'-O)-methyltransferase.	(1) S-adenosyl-L-methionine + cytidine(34) in tRNA = S-adenosyl-L-homocysteine + 2'-O-methylcytidine(34) in tRNA.(2) S-adenosyl-L-methionine + 5-carboxymethylaminomethyluridine(34) intRNA(Leu) = S-adenosyl-L-homocysteine + 5-carboxymethylaminomethyl-2'-O-methyluridine(34) in tRNA(Leu).	Control
488447870	Lactobacillus acidophilus La-14	6.3.2.12	Dihydrofolate synthase.	ATP + 7,8-dihydropteroate + L-glutamate = ADP + phosphate + 7,8-dihydropteroylglutamate.	Control
488447870	Lactobacillus acidophilus La-14	2.1.1.171	16S rRNA (guanine(966)-N(2))-methyltransferase.	S-adenosyl-L-methionine + guanine(966) in 16S rRNA = S-adenosyl-L-homocysteine + N(2)-methylguanine(966) in 16S rRNA.	Control
488447870	Lactobacillus acidophilus La-14	1.1.1.79	Glyoxylate reductase (NADP(+)).	Glycolate + NADP(+) = glyoxylate + NADPH.	Control
324314063	Odoribacter splanchnicus DSM 220712	1.1.1.26	Glyoxylate reductase.	Glycolate + NAD(+) = glyoxylate + NADH.	Control
324314063	Odoribacter splanchnicus DSM 220712	1.1.1.26	Glyoxylate reductase.	Glycolate + NAD(+) = glyoxylate + NADH.	Control
488447870	Lactobacillus acidophilus La-14	2.1.1.10	Homocysteine S-methyltransferase.	S-methyl-L-methionine + L-homocysteine = 2 L-methionine.	Control
148552872	Methanobrevibacter smithii ATCC 35061; PS; DSMZ	2.1.1.14	5-methyltetrahydropteroyltriglutamate--homocysteine S-methyltransferase.	5-methyltetrahydropteroyltri-L-glutamate + L-homocysteine =tetrahydropteroyltri-L-glutamate + L-methionine.	Control
488447870	Lactobacillus acidophilus La-14	3.5.3.1	Arginase.	L-arginine + H(2)O = L-ornithine + urea.	Control
488447870	Lactobacillus acidophilus La-14	4.2.1.22	Cystathionine beta-synthase.	L-serine + L-homocysteine = L-cystathionine + H(2)O.	Control
488447870	Lactobacillus acidophilus La-14	4.4.1.1	Cystathionine gamma-lyase.	L-cystathionine + H(2)O = L-cysteine + NH(3) + 2-oxobutanoate.	Control
488447870	Lactobacillus acidophilus La-14	4.4.1.1	Cystathionine gamma-lyase.	L-cystathionine + H(2)O = L-cysteine + NH(3) + 2-oxobutanoate.	Control
488447870	Lactobacillus acidophilus La-14	1.16.1.1	Mercury(II) reductase.	Hg + NADP(+) + H(+) = Hg(2+) + NADPH.	Control
488447870	Lactobacillus acidophilus La-14	2.1.1.176	16S rRNA (cytosine(967)-C(5))-methyltransferase.	S-adenosyl-L-methionine + cytosine(967) in 16S rRNA = S-adenosyl-L-homocysteine + 5-methylcytosine(967) in 16S rRNA.	Control
488447870	Lactobacillus acidophilus La-14	1.11.1.1	NADH peroxidase.	NADH + H(2)O(2) = NAD(+) + 2 H(2)O.	Control
324314063	Odoribacter splanchnicus DSM 220712	2.6.1.51	Serine--pyruvate transaminase.	L-serine + pyruvate = 3-hydroxypyruvate + L-alanine.	Control
324314063	Odoribacter splanchnicus DSM 220712	1.1.1.276	Serine 3-dehydrogenase.	L-serine + NADP(+) = 2-ammoniomalonate semialdehyde + NADPH.	Control
294473972	Prevotella ruminicola Bryant 23	1.11.1.9	Glutathione peroxidase.	2 glutathione + H(2)O(2) = glutathione disulfide + 2 H(2)O.	Control
294473972	Prevotella ruminicola Bryant 23	1.11.1.9	Glutathione peroxidase.	2 glutathione + H(2)O(2) = glutathione disulfide + 2 H(2)O.	Control
Unique 'Autism' Enzymes of Interest
110676061	Clostridium perfringens ATCC 13124	4.1.1.50	Adenosylmethionine decarboxylase.	S-adenosyl-L-methionine = S-adenosyl 3-(methylthio)propylamine + CO(2).	Autism
115252745	Peptoclostridium difficile 630	4.1.1.50	Adenosylmethionine decarboxylase.	S-adenosyl-L-methionine = S-adenosyl 3-(methylthio)propylamine + CO(2).	Autism
110676061	Clostridium perfringens ATCC 13124	4.1.1.22	Histidine decarboxylase.	L-histidine = histamine + CO(2).	Autism
110676061	Clostridium perfringens ATCC 13124	6.3.2.2	Glutamate--cysteine ligase.	ATP + L-glutamate + L-cysteine = ADP + phosphate + gamma-L-glutamyl-L-cysteine.	Autism
110676061	Clostridium perfringens ATCC 13124	6.3.2.3	Glutathione synthase.	ATP + gamma-L-glutamyl-L-cysteine + glycine = ADP + phosphate +glutathione.	Autism
219869941	Desulfovibrio desulfuricans ATCC 27774	1.21.4.3	Sarcosine reductase.	Acetyl phosphate + methylamine + thioredoxin disulfide + H(2)O =N-methylglycine + phosphate + thioredoxin.	Autism
219869941	Desulfovibrio desulfuricans ATCC 27774	1.21.4.3	Sarcosine reductase.	Acetyl phosphate + methylamine + thioredoxin disulfide + H(2)O =N-methylglycine + phosphate + thioredoxin.	Autism
115252745	Peptoclostridium difficile 630	1.21.4.3	Sarcosine reductase.	Acetyl phosphate + methylamine + thioredoxin disulfide + H(2)O =N-methylglycine + phosphate + thioredoxin.	Autism
115252745	Peptoclostridium difficile 630	1.21.4.3	Sarcosine reductase.	Acetyl phosphate + methylamine + thioredoxin disulfide + H(2)O =N-methylglycine + phosphate + thioredoxin.	Autism
219869941	Desulfovibrio desulfuricans ATCC 27774	1.21.4.4	Betaine reductase.	Acetyl phosphate + trimethylamine + thioredoxin disulfide + H(2)O =betaine + phosphate + thioredoxin.	Autism
115252745	Peptoclostridium difficile 630	1.21.4.4	Betaine reductase.	Acetyl phosphate + trimethylamine + thioredoxin disulfide + H(2)O =betaine + phosphate + thioredoxin.	Autism
115252745	Peptoclostridium difficile 630	1.21.4.4	Betaine reductase.	Acetyl phosphate + trimethylamine + thioredoxin disulfide + H(2)O =betaine + phosphate + thioredoxin.	Autism
219869941	Desulfovibrio desulfuricans ATCC 27774	1.21.4.2	Glycine reductase.	Acetyl phosphate + NH(3) + thioredoxin disulfide + H(2)O = glycine +phosphate + thioredoxin.	Autism
219869941	Desulfovibrio desulfuricans ATCC 27774	1.21.4.2	Glycine reductase.	Acetyl phosphate + NH(3) + thioredoxin disulfide + H(2)O = glycine +phosphate + thioredoxin.	Autism
115252745	Peptoclostridium difficile 630	1.21.4.2	Glycine reductase.	Acetyl phosphate + NH(3) + thioredoxin disulfide + H(2)O = glycine +phosphate + thioredoxin.	Autism
115252745	Peptoclostridium difficile 630	1.21.4.2	Glycine reductase.	Acetyl phosphate + NH(3) + thioredoxin disulfide + H(2)O = glycine +phosphate + thioredoxin.	Autism
115252745	Peptoclostridium difficile 630	1.21.4.2	Glycine reductase.	Acetyl phosphate + NH(3) + thioredoxin disulfide + H(2)O = glycine +phosphate + thioredoxin.	Autism
115252745	Peptoclostridium difficile 630	1.21.4.2	Glycine reductase.	Acetyl phosphate + NH(3) + thioredoxin disulfide + H(2)O = glycine +phosphate + thioredoxin.	Autism
115252745	Peptoclostridium difficile 630	1.21.4.2	Glycine reductase.	Acetyl phosphate + NH(3) + thioredoxin disulfide + H(2)O = glycine +phosphate + thioredoxin.	Autism
219869941	Desulfovibrio desulfuricans ATCC 27774	2.6.1.44	Alanine--glyoxylate transaminase.	L-alanine + glyoxylate = pyruvate + glycine.	Autism
219869941	Desulfovibrio desulfuricans ATCC 27774	1.8.99.3	Hydrogensulfite reductase.	(O(3)S.S.SO(3))(2-) + acceptor + 2 H(2)O + OH(-) = 3 HSO(3)(-) + reducedacceptor.	Autism
219869941	Desulfovibrio desulfuricans ATCC 27774	1.8.99.3	Hydrogensulfite reductase.	(O(3)S.S.SO(3))(2-) + acceptor + 2 H(2)O + OH(-) = 3 HSO(3)(-) + reducedacceptor.	Autism
219869941	Desulfovibrio desulfuricans ATCC 27774	1.2.7.5	Aldehyde ferredoxin oxidoreductase.	An aldehyde + H(2)O + 2 oxidized ferredoxin = a carboxylate + 2 H(+) +2 reduced ferredoxin.	Autism
115252745	Peptoclostridium difficile 630	4.4.1.11	Methionine gamma-lyase.	L-methionine + H(2)O = methanethiol + NH(3) + 2-oxobutanoate.	Autism
115252745	Peptoclostridium difficile 630	1.8.1.2	Sulfite reductase (NADPH).	H(2)S + 3 NADP(+) + 3 H(2)O = sulfite + 3 NADPH.	Autism
187426706	Akkermansia muciniphila ATCC BAA-835	1.8.1.2	Sulfite reductase (NADPH).	H(2)S + 3 NADP(+) + 3 H(2)O = sulfite + 3 NADPH.	Autism
115252745	Peptoclostridium difficile 630	5.4.3.5	D-ornithine 4,5-aminomutase.	D-ornithine = (2R,4S)-2,4-diaminopentanoate.	Autism
115252745	Peptoclostridium difficile 630	5.1.1.12	Ornithine racemase.	L-ornithine = D-ornithine.	Autism

## Sheet: Table S4-Query2 Raw Data
Table S4. Query2 Raw Data.
URL: cheberling-homepc.com/comparative_microbial_metabolomics/gene_search_form.cgi
Form results, 11-16-2014, 03:57
Comparative Microbial Metabolomics - Enzyme Search Form
Author: Colin Heberling, 2014
Questions and concerns, please contact colin.heberling@gmail.com
Enzyme data is taken from the Enzyme Nomenclature Database: Bairoch A. The ENZYME database in 2000. Nucleic Acids Res. 28:304-305(2000).
Instructions:
Choose two groups of microbial genomes (microbiomes) from the following multi-select forms, enter a search term to match against potential coded enzymes, then click 'Submit'. You will be presented with three tables: one showing enzymes with identical enzyme commission (EC) numbers between your two microbiomes, and two more showing coded enzymes that are unique for each microbiome. Only entries ma…
To save results to file, highlight all text (CTRL+A on Windows systems), copy text, open a new document and paste text. In MS Excel, right click inside a cell and choose 'paste special', and choose to paste 'text'. Adjust column widths as you see fit.
Organisms in control:
167660682	Alistipes putredinis DSM 17216
291516108	Alistipes shahii WAL 8301
392623967	Bacteroides caccae CL03T12C61
60495220	Bacteroides fragilis ATCC 25285 = NCTC 93
29342100	Bacteroides thetaiotaomicron VPI-5482
666001751	Bifidobacterium longum BXY01
156867138	Clostridium leptum DSM 753
291526581	Eubacterium rectale DSM 17629
295102938	Faecalibacterium prausnitzii L2/6
488447870	Lactobacillus acidophilus La-14
148552872	Methanobrevibacter smithii ATCC 35061; PS; DSMZ
324314063	Odoribacter splanchnicus DSM 220712
294473972	Prevotella ruminicola Bryant 23
291541371	Roseburia intestinalis XB6B4
291543183	Ruminococcus bromii L2-63
338855045	Weissella koreensis KACC 15510
Organisms in autism:
187426706	Akkermansia muciniphila ATCC BAA-835
149935097	Bacteroides vulgatus ATCC 8482
480704622	Clostridium bolteae 90A9
110676061	Clostridium perfringens ATCC 13124
219869941	Desulfovibrio desulfuricans ATCC 27774
115252745	Peptoclostridium difficile 630
512689910	Sutterella wadsworthensis HGA0223
Received search term query ''.
Similar coded enzymes: 41035 match(es).
GI Accession	Organism Name	EC_number	Enzyme Name	Biochemistry	Reliability	Microbiome Name
167660682	Alistipes putredinis DSM 17216	2.3.1.129	Acyl-[acyl-carrier-protein]--UDP-N-acetylglucosamine O-acyltransferase.	(R)-3-hydroxytetradecanoyl-[acyl-carrier-protein] + UDP-N-acetyl-alpha-D- glucosamine = [acyl-carrier-protein] + UDP-3-O-(3-hydroxytetradecanoyl)- N-acetyl-alpha-D-glucosamine.	1	control
187426706	Akkermansia muciniphila ATCC BAA-835	2.3.1.129	Acyl-[acyl-carrier-protein]--UDP-N-acetylglucosamine O-acyltransferase.	(R)-3-hydroxytetradecanoyl-[acyl-carrier-protein] + UDP-N-acetyl-alpha-D- glucosamine = [acyl-carrier-protein] + UDP-3-O-(3-hydroxytetradecanoyl)- N-acetyl-alpha-D-glucosamine.	1	autism
167660682	Alistipes putredinis DSM 17216	2.1.1.61	tRNA (5-methylaminomethyl-2-thiouridylate)-methyltransferase.	S-adenosyl-L-methionine + tRNA containing 5-aminomethyl-2-thiouridine = S-adenosyl-L-homocysteine + tRNA containing 5-methylaminomethyl-2- thiouridylate.	1	control
187426706	Akkermansia muciniphila ATCC BAA-835	2.1.1.61	tRNA (5-methylaminomethyl-2-thiouridylate)-methyltransferase.	S-adenosyl-L-methionine + tRNA containing 5-aminomethyl-2-thiouridine = S-adenosyl-L-homocysteine + tRNA containing 5-methylaminomethyl-2- thiouridylate.	1	autism
167660682	Alistipes putredinis DSM 17216	2.1.1.61	tRNA (5-methylaminomethyl-2-thiouridylate)-methyltransferase.	S-adenosyl-L-methionine + tRNA containing 5-aminomethyl-2-thiouridine = S-adenosyl-L-homocysteine + tRNA containing 5-methylaminomethyl-2- thiouridylate.	1	control
110676061	Clostridium perfringens ATCC 13124	2.1.1.61	tRNA (5-methylaminomethyl-2-thiouridylate)-methyltransferase.	S-adenosyl-L-methionine + tRNA containing 5-aminomethyl-2-thiouridine = S-adenosyl-L-homocysteine + tRNA containing 5-methylaminomethyl-2- thiouridylate.	1	autism
167660682	Alistipes putredinis DSM 17216	2.1.1.61	tRNA (5-methylaminomethyl-2-thiouridylate)-methyltransferase.	S-adenosyl-L-methionine + tRNA containing 5-aminomethyl-2-thiouridine = S-adenosyl-L-homocysteine + tRNA containing 5-methylaminomethyl-2- thiouridylate.	1	control
219869941	Desulfovibrio desulfuricans ATCC 27774	2.1.1.61	tRNA (5-methylaminomethyl-2-thiouridylate)-methyltransferase.	S-adenosyl-L-methionine + tRNA containing 5-aminomethyl-2-thiouridine = S-adenosyl-L-homocysteine + tRNA containing 5-methylaminomethyl-2- thiouridylate.	1	autism
167660682	Alistipes putredinis DSM 17216	2.5.1.19	3-phosphoshikimate 1-carboxyvinyltransferase.	Phosphoenolpyruvate + 3-phosphoshikimate = phosphate + 5-O- (1-carboxyvinyl)-3-phosphoshikimate.	1	control
187426706	Akkermansia muciniphila ATCC BAA-835	2.5.1.19	3-phosphoshikimate 1-carboxyvinyltransferase.	Phosphoenolpyruvate + 3-phosphoshikimate = phosphate + 5-O- (1-carboxyvinyl)-3-phosphoshikimate.	1	autism
167660682	Alistipes putredinis DSM 17216	2.5.1.19	3-phosphoshikimate 1-carboxyvinyltransferase.	Phosphoenolpyruvate + 3-phosphoshikimate = phosphate + 5-O- (1-carboxyvinyl)-3-phosphoshikimate.	1	control
110676061	Clostridium perfringens ATCC 13124	2.5.1.19	3-phosphoshikimate 1-carboxyvinyltransferase.	Phosphoenolpyruvate + 3-phosphoshikimate = phosphate + 5-O- (1-carboxyvinyl)-3-phosphoshikimate.	1	autism
167660682	Alistipes putredinis DSM 17216	2.5.1.19	3-phosphoshikimate 1-carboxyvinyltransferase.	Phosphoenolpyruvate + 3-phosphoshikimate = phosphate + 5-O- (1-carboxyvinyl)-3-phosphoshikimate.	1	control
219869941	Desulfovibrio desulfuricans ATCC 27774	2.5.1.19	3-phosphoshikimate 1-carboxyvinyltransferase.	Phosphoenolpyruvate + 3-phosphoshikimate = phosphate + 5-O- (1-carboxyvinyl)-3-phosphoshikimate.	1	autism
167660682	Alistipes putredinis DSM 17216	2.5.1.19	3-phosphoshikimate 1-carboxyvinyltransferase.	Phosphoenolpyruvate + 3-phosphoshikimate = phosphate + 5-O- (1-carboxyvinyl)-3-phosphoshikimate.	1	control
115252745	Peptoclostridium difficile 630	2.5.1.19	3-phosphoshikimate 1-carboxyvinyltransferase.	Phosphoenolpyruvate + 3-phosphoshikimate = phosphate + 5-O- (1-carboxyvinyl)-3-phosphoshikimate.	1	autism
167660682	Alistipes putredinis DSM 17216	1.2.7.1	Pyruvate synthase.	Pyruvate + CoA + 2 oxidized ferredoxin = acetyl-CoA + CO(2) + 2 reduced ferredoxin + 2 H(+).	1	control
187426706	Akkermansia muciniphila ATCC BAA-835	1.2.7.1	Pyruvate synthase.	Pyruvate + CoA + 2 oxidized ferredoxin = acetyl-CoA + CO(2) + 2 reduced ferredoxin + 2 H(+).	0	autism
167660682	Alistipes putredinis DSM 17216	1.2.7.1	Pyruvate synthase.	Pyruvate + CoA + 2 oxidized ferredoxin = acetyl-CoA + CO(2) + 2 reduced ferredoxin + 2 H(+).	1	control
480704622	Clostridium bolteae 90A9	1.2.7.1	Pyruvate synthase.	Pyruvate + CoA + 2 oxidized ferredoxin = acetyl-CoA + CO(2) + 2 reduced ferredoxin + 2 H(+).	0	autism
167660682	Alistipes putredinis DSM 17216	1.2.7.1	Pyruvate synthase.	Pyruvate + CoA + 2 oxidized ferredoxin = acetyl-CoA + CO(2) + 2 reduced ferredoxin + 2 H(+).	1	control
480704622	Clostridium bolteae 90A9	1.2.7.1	Pyruvate synthase.	Pyruvate + CoA + 2 oxidized ferredoxin = acetyl-CoA + CO(2) + 2 reduced ferredoxin + 2 H(+).	0	autism
167660682	Alistipes putredinis DSM 17216	1.2.7.1	Pyruvate synthase.	Pyruvate + CoA + 2 oxidized ferredoxin = acetyl-CoA + CO(2) + 2 reduced ferredoxin + 2 H(+).	1	control
480704622	Clostridium bolteae 90A9	1.2.7.1	Pyruvate synthase.	Pyruvate + CoA + 2 oxidized ferredoxin = acetyl-CoA + CO(2) + 2 reduced ferredoxin + 2 H(+).	0	autism
167660682	Alistipes putredinis DSM 17216	1.2.7.1	Pyruvate synthase.	Pyruvate + CoA + 2 oxidized ferredoxin = acetyl-CoA + CO(2) + 2 reduced ferredoxin + 2 H(+).	1	control
110676061	Clostridium perfringens ATCC 13124	1.2.7.1	Pyruvate synthase.	Pyruvate + CoA + 2 oxidized ferredoxin = acetyl-CoA + CO(2) + 2 reduced ferredoxin + 2 H(+).	1	autism
167660682	Alistipes putredinis DSM 17216	1.2.7.1	Pyruvate synthase.	Pyruvate + CoA + 2 oxidized ferredoxin = acetyl-CoA + CO(2) + 2 reduced ferredoxin + 2 H(+).	1	control
115252745	Peptoclostridium difficile 630	1.2.7.1	Pyruvate synthase.	Pyruvate + CoA + 2 oxidized ferredoxin = acetyl-CoA + CO(2) + 2 reduced ferredoxin + 2 H(+).	0	autism
167660682	Alistipes putredinis DSM 17216	1.2.7.1	Pyruvate synthase.	Pyruvate + CoA + 2 oxidized ferredoxin = acetyl-CoA + CO(2) + 2 reduced ferredoxin + 2 H(+).	1	control
115252745	Peptoclostridium difficile 630	1.2.7.1	Pyruvate synthase.	Pyruvate + CoA + 2 oxidized ferredoxin = acetyl-CoA + CO(2) + 2 reduced ferredoxin + 2 H(+).	0	autism
167660682	Alistipes putredinis DSM 17216	3.1.3.7	3'(2'),5'-bisphosphate nucleotidase.	Adenosine 3',5'-bisphosphate + H(2)O = adenosine 5'-phosphate + phosphate.	1	control
149935097	Bacteroides vulgatus ATCC 8482	3.1.3.7	3'(2'),5'-bisphosphate nucleotidase.	Adenosine 3',5'-bisphosphate + H(2)O = adenosine 5'-phosphate + phosphate.	0	autism
167660682	Alistipes putredinis DSM 17216	6.3.1.5	NAD(+) synthase.	ATP + deamido-NAD(+) + NH(3) = AMP + diphosphate + NAD(+).	1	control
110676061	Clostridium perfringens ATCC 13124	6.3.1.5	NAD(+) synthase.	ATP + deamido-NAD(+) + NH(3) = AMP + diphosphate + NAD(+).	1	autism
167660682	Alistipes putredinis DSM 17216	6.3.1.5	NAD(+) synthase.	ATP + deamido-NAD(+) + NH(3) = AMP + diphosphate + NAD(+).	1	control
115252745	Peptoclostridium difficile 630	6.3.1.5	NAD(+) synthase.	ATP + deamido-NAD(+) + NH(3) = AMP + diphosphate + NAD(+).	1	autism
167660682	Alistipes putredinis DSM 17216	2.4.2.8	Hypoxanthine phosphoribosyltransferase.	IMP + diphosphate = hypoxanthine + 5-phospho-alpha-D-ribose 1-diphosphate.	1	control
187426706	Akkermansia muciniphila ATCC BAA-835	2.4.2.8	Hypoxanthine phosphoribosyltransferase.	IMP + diphosphate = hypoxanthine + 5-phospho-alpha-D-ribose 1-diphosphate.	0	autism
167660682	Alistipes putredinis DSM 17216	2.4.2.8	Hypoxanthine phosphoribosyltransferase.	IMP + diphosphate = hypoxanthine + 5-phospho-alpha-D-ribose 1-diphosphate.	1	control
187426706	Akkermansia muciniphila ATCC BAA-835	2.4.2.8	Hypoxanthine phosphoribosyltransferase.	IMP + diphosphate = hypoxanthine + 5-phospho-alpha-D-ribose 1-diphosphate.	0	autism
167660682	Alistipes putredinis DSM 17216	2.4.2.8	Hypoxanthine phosphoribosyltransferase.	IMP + diphosphate = hypoxanthine + 5-phospho-alpha-D-ribose 1-diphosphate.	1	control
149935097	Bacteroides vulgatus ATCC 8482	2.4.2.8	Hypoxanthine phosphoribosyltransferase.	IMP + diphosphate = hypoxanthine + 5-phospho-alpha-D-ribose 1-diphosphate.	1	autism
167660682	Alistipes putredinis DSM 17216	2.4.2.8	Hypoxanthine phosphoribosyltransferase.	IMP + diphosphate = hypoxanthine + 5-phospho-alpha-D-ribose 1-diphosphate.	1	control
480704622	Clostridium bolteae 90A9	2.4.2.8	Hypoxanthine phosphoribosyltransferase.	IMP + diphosphate = hypoxanthine + 5-phospho-alpha-D-ribose 1-diphosphate.	1	autism
167660682	Alistipes putredinis DSM 17216	2.4.2.8	Hypoxanthine phosphoribosyltransferase.	IMP + diphosphate = hypoxanthine + 5-phospho-alpha-D-ribose 1-diphosphate.	1	control
110676061	Clostridium perfringens ATCC 13124	2.4.2.8	Hypoxanthine phosphoribosyltransferase.	IMP + diphosphate = hypoxanthine + 5-phospho-alpha-D-ribose 1-diphosphate.	1	autism
167660682	Alistipes putredinis DSM 17216	2.4.2.8	Hypoxanthine phosphoribosyltransferase.	IMP + diphosphate = hypoxanthine + 5-phospho-alpha-D-ribose 1-diphosphate.	1	control
110676061	Clostridium perfringens ATCC 13124	2.4.2.8	Hypoxanthine phosphoribosyltransferase.	IMP + diphosphate = hypoxanthine + 5-phospho-alpha-D-ribose 1-diphosphate.	1	autism
167660682	Alistipes putredinis DSM 17216	2.4.2.8	Hypoxanthine phosphoribosyltransferase.	IMP + diphosphate = hypoxanthine + 5-phospho-alpha-D-ribose 1-diphosphate.	1	control
219869941	Desulfovibrio desulfuricans ATCC 27774	2.4.2.8	Hypoxanthine phosphoribosyltransferase.	IMP + diphosphate = hypoxanthine + 5-phospho-alpha-D-ribose 1-diphosphate.	1	autism
167660682	Alistipes putredinis DSM 17216	2.4.2.8	Hypoxanthine phosphoribosyltransferase.	IMP + diphosphate = hypoxanthine + 5-phospho-alpha-D-ribose 1-diphosphate.	1	control
115252745	Peptoclostridium difficile 630	2.4.2.8	Hypoxanthine phosphoribosyltransferase.	IMP + diphosphate = hypoxanthine + 5-phospho-alpha-D-ribose 1-diphosphate.	1	autism
167660682	Alistipes putredinis DSM 17216	2.4.2.8	Hypoxanthine phosphoribosyltransferase.	IMP + diphosphate = hypoxanthine + 5-phospho-alpha-D-ribose 1-diphosphate.	1	control
115252745	Peptoclostridium difficile 630	2.4.2.8	Hypoxanthine phosphoribosyltransferase.	IMP + diphosphate = hypoxanthine + 5-phospho-alpha-D-ribose 1-diphosphate.	1	autism
167660682	Alistipes putredinis DSM 17216	2.7.4.16	Thiamine-phosphate kinase.	ATP + thiamine phosphate = ADP + thiamine diphosphate.	1	control
219869941	Desulfovibrio desulfuricans ATCC 27774	2.7.4.16	Thiamine-phosphate kinase.	ATP + thiamine phosphate = ADP + thiamine diphosphate.	1	autism
167660682	Alistipes putredinis DSM 17216	2.7.1.40	Pyruvate kinase.	ATP + pyruvate = ADP + phosphoenolpyruvate.	1	control
187426706	Akkermansia muciniphila ATCC BAA-835	2.7.1.40	Pyruvate kinase.	ATP + pyruvate = ADP + phosphoenolpyruvate.	1	autism
167660682	Alistipes putredinis DSM 17216	2.7.1.40	Pyruvate kinase.	ATP + pyruvate = ADP + phosphoenolpyruvate.	1	control
149935097	Bacteroides vulgatus ATCC 8482	2.7.1.40	Pyruvate kinase.	ATP + pyruvate = ADP + phosphoenolpyruvate.	1	autism
167660682	Alistipes putredinis DSM 17216	2.7.1.40	Pyruvate kinase.	ATP + pyruvate = ADP + phosphoenolpyruvate.	1	control
480704622	Clostridium bolteae 90A9	2.7.1.40	Pyruvate kinase.	ATP + pyruvate = ADP + phosphoenolpyruvate.	1	autism
167660682	Alistipes putredinis DSM 17216	2.7.1.40	Pyruvate kinase.	ATP + pyruvate = ADP + phosphoenolpyruvate.	1	control
110676061	Clostridium perfringens ATCC 13124	2.7.1.40	Pyruvate kinase.	ATP + pyruvate = ADP + phosphoenolpyruvate.	1	autism
167660682	Alistipes putredinis DSM 17216	2.7.1.40	Pyruvate kinase.	ATP + pyruvate = ADP + phosphoenolpyruvate.	1	control
110676061	Clostridium perfringens ATCC 13124	2.7.1.40	Pyruvate kinase.	ATP + pyruvate = ADP + phosphoenolpyruvate.	1	autism
167660682	Alistipes putredinis DSM 17216	2.7.1.40	Pyruvate kinase.	ATP + pyruvate = ADP + phosphoenolpyruvate.	1	control
219869941	Desulfovibrio desulfuricans ATCC 27774	2.7.1.40	Pyruvate kinase.	ATP + pyruvate = ADP + phosphoenolpyruvate.	1	autism
167660682	Alistipes putredinis DSM 17216	2.7.1.40	Pyruvate kinase.	ATP + pyruvate = ADP + phosphoenolpyruvate.	1	control
115252745	Peptoclostridium difficile 630	2.7.1.40	Pyruvate kinase.	ATP + pyruvate = ADP + phosphoenolpyruvate.	1	autism
167660682	Alistipes putredinis DSM 17216	2.7.2.7	Butyrate kinase.	ATP + butanoate = ADP + butanoyl phosphate.	1	control
480704622	Clostridium bolteae 90A9	2.7.2.7	Butyrate kinase.	ATP + butanoate = ADP + butanoyl phosphate.	1	autism
167660682	Alistipes putredinis DSM 17216	2.7.2.7	Butyrate kinase.	ATP + butanoate = ADP + butanoyl phosphate.	1	control
480704622	Clostridium bolteae 90A9	2.7.2.7	Butyrate kinase.	ATP + butanoate = ADP + butanoyl phosphate.	1	autism
167660682	Alistipes putredinis DSM 17216	2.7.2.7	Butyrate kinase.	ATP + butanoate = ADP + butanoyl phosphate.	1	control
110676061	Clostridium perfringens ATCC 13124	2.7.2.7	Butyrate kinase.	ATP + butanoate = ADP + butanoyl phosphate.	1	autism
167660682	Alistipes putredinis DSM 17216	2.7.2.7	Butyrate kinase.	ATP + butanoate = ADP + butanoyl phosphate.	1	control
115252745	Peptoclostridium difficile 630	2.7.2.7	Butyrate kinase.	ATP + butanoate = ADP + butanoyl phosphate.	1	autism
167660682	Alistipes putredinis DSM 17216	2.7.2.7	Butyrate kinase.	ATP + butanoate = ADP + butanoyl phosphate.	1	control
115252745	Peptoclostridium difficile 630	2.7.2.7	Butyrate kinase.	ATP + butanoate = ADP + butanoyl phosphate.	1	autism
167660682	Alistipes putredinis DSM 17216	2.7.2.7	Butyrate kinase.	ATP + butanoate = ADP + butanoyl phosphate.	1	control
115252745	Peptoclostridium difficile 630	2.7.2.7	Butyrate kinase.	ATP + butanoate = ADP + butanoyl phosphate.	1	autism
167660682	Alistipes putredinis DSM 17216	2.7.2.1	Acetate kinase.	ATP + acetate = ADP + acetyl phosphate.	1	control
149935097	Bacteroides vulgatus ATCC 8482	2.7.2.1	Acetate kinase.	ATP + acetate = ADP + acetyl phosphate.	0	autism
167660682	Alistipes putredinis DSM 17216	2.7.2.1	Acetate kinase.	ATP + acetate = ADP + acetyl phosphate.	1	control
480704622	Clostridium bolteae 90A9	2.7.2.1	Acetate kinase.	ATP + acetate = ADP + acetyl phosphate.	0	autism
167660682	Alistipes putredinis DSM 17216	2.7.2.1	Acetate kinase.	ATP + acetate = ADP + acetyl phosphate.	1	control
110676061	Clostridium perfringens ATCC 13124	2.7.2.1	Acetate kinase.	ATP + acetate = ADP + acetyl phosphate.	1	autism
167660682	Alistipes putredinis DSM 17216	2.7.2.1	Acetate kinase.	ATP + acetate = ADP + acetyl phosphate.	1	control
110676061	Clostridium perfringens ATCC 13124	2.7.2.1	Acetate kinase.	ATP + acetate = ADP + acetyl phosphate.	1	autism
167660682	Alistipes putredinis DSM 17216	2.7.2.1	Acetate kinase.	ATP + acetate = ADP + acetyl phosphate.	1	control
219869941	Desulfovibrio desulfuricans ATCC 27774	2.7.2.1	Acetate kinase.	ATP + acetate = ADP + acetyl phosphate.	0	autism
167660682	Alistipes putredinis DSM 17216	2.7.2.1	Acetate kinase.	ATP + acetate = ADP + acetyl phosphate.	1	control
115252745	Peptoclostridium difficile 630	2.7.2.1	Acetate kinase.	ATP + acetate = ADP + acetyl phosphate.	1	autism
167660682	Alistipes putredinis DSM 17216	6.3.4.2	CTP synthase (glutamine hydrolyzing).	ATP + UTP + L-glutamine = ADP + phosphate + CTP + L-glutamate.	1	control
187426706	Akkermansia muciniphila ATCC BAA-835	6.3.4.2	CTP synthase (glutamine hydrolyzing).	ATP + UTP + L-glutamine = ADP + phosphate + CTP + L-glutamate.	1	autism
167660682	Alistipes putredinis DSM 17216	6.3.4.2	CTP synthase (glutamine hydrolyzing).	ATP + UTP + L-glutamine = ADP + phosphate + CTP + L-glutamate.	1	control
110676061	Clostridium perfringens ATCC 13124	6.3.4.2	CTP synthase (glutamine hydrolyzing).	ATP + UTP + L-glutamine = ADP + phosphate + CTP + L-glutamate.	1	autism
167660682	Alistipes putredinis DSM 17216	6.3.4.2	CTP synthase (glutamine hydrolyzing).	ATP + UTP + L-glutamine = ADP + phosphate + CTP + L-glutamate.	1	control
219869941	Desulfovibrio desulfuricans ATCC 27774	6.3.4.2	CTP synthase (glutamine hydrolyzing).	ATP + UTP + L-glutamine = ADP + phosphate + CTP + L-glutamate.	1	autism
167660682	Alistipes putredinis DSM 17216	2.7.6.1	Ribose-phosphate diphosphokinase.	ATP + D-ribose 5-phosphate = AMP + 5-phospho-alpha-D-ribose 1-diphosphate.	1	control
187426706	Akkermansia muciniphila ATCC BAA-835	2.7.6.1	Ribose-phosphate diphosphokinase.	ATP + D-ribose 5-phosphate = AMP + 5-phospho-alpha-D-ribose 1-diphosphate.	1	autism
167660682	Alistipes putredinis DSM 17216	2.7.6.1	Ribose-phosphate diphosphokinase.	ATP + D-ribose 5-phosphate = AMP + 5-phospho-alpha-D-ribose 1-diphosphate.	1	control
110676061	Clostridium perfringens ATCC 13124	2.7.6.1	Ribose-phosphate diphosphokinase.	ATP + D-ribose 5-phosphate = AMP + 5-phospho-alpha-D-ribose 1-diphosphate.	1	autism
167660682	Alistipes putredinis DSM 17216	2.7.6.1	Ribose-phosphate diphosphokinase.	ATP + D-ribose 5-phosphate = AMP + 5-phospho-alpha-D-ribose 1-diphosphate.	1	control
110676061	Clostridium perfringens ATCC 13124	2.7.6.1	Ribose-phosphate diphosphokinase.	ATP + D-ribose 5-phosphate = AMP + 5-phospho-alpha-D-ribose 1-diphosphate.	1	autism
167660682	Alistipes putredinis DSM 17216	2.7.6.1	Ribose-phosphate diphosphokinase.	ATP + D-ribose 5-phosphate = AMP + 5-phospho-alpha-D-ribose 1-diphosphate.	1	control
219869941	Desulfovibrio desulfuricans ATCC 27774	2.7.6.1	Ribose-phosphate diphosphokinase.	ATP + D-ribose 5-phosphate = AMP + 5-phospho-alpha-D-ribose 1-diphosphate.	1	autism
167660682	Alistipes putredinis DSM 17216	2.7.6.1	Ribose-phosphate diphosphokinase.	ATP + D-ribose 5-phosphate = AMP + 5-phospho-alpha-D-ribose 1-diphosphate.	1	control
115252745	Peptoclostridium difficile 630	2.7.6.1	Ribose-phosphate diphosphokinase.	ATP + D-ribose 5-phosphate = AMP + 5-phospho-alpha-D-ribose 1-diphosphate.	1	autism
167660682	Alistipes putredinis DSM 17216	2.7.1.24	Dephospho-CoA kinase.	ATP + 3'-dephospho-CoA = ADP + CoA.	1	control
187426706	Akkermansia muciniphila ATCC BAA-835	2.7.1.24	Dephospho-CoA kinase.	ATP + 3'-dephospho-CoA = ADP + CoA.	1	autism
167660682	Alistipes putredinis DSM 17216	2.7.1.24	Dephospho-CoA kinase.	ATP + 3'-dephospho-CoA = ADP + CoA.	1	control
110676061	Clostridium perfringens ATCC 13124	2.7.1.24	Dephospho-CoA kinase.	ATP + 3'-dephospho-CoA = ADP + CoA.	1	autism
167660682	Alistipes putredinis DSM 17216	2.7.1.24	Dephospho-CoA kinase.	ATP + 3'-dephospho-CoA = ADP + CoA.	1	control
115252745	Peptoclostridium difficile 630	2.7.1.24	Dephospho-CoA kinase.	ATP + 3'-dephospho-CoA = ADP + CoA.	1	autism
167660682	Alistipes putredinis DSM 17216	2.5.1.15	Dihydropteroate synthase.	(2-amino-4-hydroxy-7,8-dihydropteridin-6-yl)methyl diphosphate + 4-aminobenzoate = diphosphate + dihydropteroate.	1	control
187426706	Akkermansia muciniphila ATCC BAA-835	2.5.1.15	Dihydropteroate synthase.	(2-amino-4-hydroxy-7,8-dihydropteridin-6-yl)methyl diphosphate + 4-aminobenzoate = diphosphate + dihydropteroate.	1	autism
167660682	Alistipes putredinis DSM 17216	2.5.1.15	Dihydropteroate synthase.	(2-amino-4-hydroxy-7,8-dihydropteridin-6-yl)methyl diphosphate + 4-aminobenzoate = diphosphate + dihydropteroate.	1	control
149935097	Bacteroides vulgatus ATCC 8482	2.5.1.15	Dihydropteroate synthase.	(2-amino-4-hydroxy-7,8-dihydropteridin-6-yl)methyl diphosphate + 4-aminobenzoate = diphosphate + dihydropteroate.	1	autism
167660682	Alistipes putredinis DSM 17216	2.5.1.15	Dihydropteroate synthase.	(2-amino-4-hydroxy-7,8-dihydropteridin-6-yl)methyl diphosphate + 4-aminobenzoate = diphosphate + dihydropteroate.	1	control
480704622	Clostridium bolteae 90A9	2.5.1.15	Dihydropteroate synthase.	(2-amino-4-hydroxy-7,8-dihydropteridin-6-yl)methyl diphosphate + 4-aminobenzoate = diphosphate + dihydropteroate.	1	autism
167660682	Alistipes putredinis DSM 17216	2.5.1.15	Dihydropteroate synthase.	(2-amino-4-hydroxy-7,8-dihydropteridin-6-yl)methyl diphosphate + 4-aminobenzoate = diphosphate + dihydropteroate.	1	control
110676061	Clostridium perfringens ATCC 13124	2.5.1.15	Dihydropteroate synthase.	(2-amino-4-hydroxy-7,8-dihydropteridin-6-yl)methyl diphosphate + 4-aminobenzoate = diphosphate + dihydropteroate.	1	autism
167660682	Alistipes putredinis DSM 17216	2.5.1.15	Dihydropteroate synthase.	(2-amino-4-hydroxy-7,8-dihydropteridin-6-yl)methyl diphosphate + 4-aminobenzoate = diphosphate + dihydropteroate.	1	control
219869941	Desulfovibrio desulfuricans ATCC 27774	2.5.1.15	Dihydropteroate synthase.	(2-amino-4-hydroxy-7,8-dihydropteridin-6-yl)methyl diphosphate + 4-aminobenzoate = diphosphate + dihydropteroate.	1	autism
167660682	Alistipes putredinis DSM 17216	2.5.1.15	Dihydropteroate synthase.	(2-amino-4-hydroxy-7,8-dihydropteridin-6-yl)methyl diphosphate + 4-aminobenzoate = diphosphate + dihydropteroate.	1	control
115252745	Peptoclostridium difficile 630	2.5.1.15	Dihydropteroate synthase.	(2-amino-4-hydroxy-7,8-dihydropteridin-6-yl)methyl diphosphate + 4-aminobenzoate = diphosphate + dihydropteroate.	1	autism
167660682	Alistipes putredinis DSM 17216	2.5.1.15	Dihydropteroate synthase.	(2-amino-4-hydroxy-7,8-dihydropteridin-6-yl)methyl diphosphate + 4-aminobenzoate = diphosphate + dihydropteroate.	1	control
512689910	Sutterella wadsworthensis HGA0223	2.5.1.15	Dihydropteroate synthase.	(2-amino-4-hydroxy-7,8-dihydropteridin-6-yl)methyl diphosphate + 4-aminobenzoate = diphosphate + dihydropteroate.	1	autism
167660682	Alistipes putredinis DSM 17216	1.8.1.9	Thioredoxin-disulfide reductase.	Thioredoxin + NADP(+) = thioredoxin disulfide + NADPH.	0	control
187426706	Akkermansia muciniphila ATCC BAA-835	1.8.1.9	Thioredoxin-disulfide reductase.	Thioredoxin + NADP(+) = thioredoxin disulfide + NADPH.	0	autism
167660682	Alistipes putredinis DSM 17216	1.8.1.9	Thioredoxin-disulfide reductase.	Thioredoxin + NADP(+) = thioredoxin disulfide + NADPH.	0	control
187426706	Akkermansia muciniphila ATCC BAA-835	1.8.1.9	Thioredoxin-disulfide reductase.	Thioredoxin + NADP(+) = thioredoxin disulfide + NADPH.	1	autism
167660682	Alistipes putredinis DSM 17216	1.8.1.9	Thioredoxin-disulfide reductase.	Thioredoxin + NADP(+) = thioredoxin disulfide + NADPH.	0	control
149935097	Bacteroides vulgatus ATCC 8482	1.8.1.9	Thioredoxin-disulfide reductase.	Thioredoxin + NADP(+) = thioredoxin disulfide + NADPH.	0	autism
167660682	Alistipes putredinis DSM 17216	1.8.1.9	Thioredoxin-disulfide reductase.	Thioredoxin + NADP(+) = thioredoxin disulfide + NADPH.	0	control
149935097	Bacteroides vulgatus ATCC 8482	1.8.1.9	Thioredoxin-disulfide reductase.	Thioredoxin + NADP(+) = thioredoxin disulfide + NADPH.	0	autism
167660682	Alistipes putredinis DSM 17216	1.8.1.9	Thioredoxin-disulfide reductase.	Thioredoxin + NADP(+) = thioredoxin disulfide + NADPH.	0	control
149935097	Bacteroides vulgatus ATCC 8482	1.8.1.9	Thioredoxin-disulfide reductase.	Thioredoxin + NADP(+) = thioredoxin disulfide + NADPH.	0	autism
167660682	Alistipes putredinis DSM 17216	1.8.1.9	Thioredoxin-disulfide reductase.	Thioredoxin + NADP(+) = thioredoxin disulfide + NADPH.	0	control
149935097	Bacteroides vulgatus ATCC 8482	1.8.1.9	Thioredoxin-disulfide reductase.	Thioredoxin + NADP(+) = thioredoxin disulfide + NADPH.	0	autism
167660682	Alistipes putredinis DSM 17216	1.8.1.9	Thioredoxin-disulfide reductase.	Thioredoxin + NADP(+) = thioredoxin disulfide + NADPH.	0	control
149935097	Bacteroides vulgatus ATCC 8482	1.8.1.9	Thioredoxin-disulfide reductase.	Thioredoxin + NADP(+) = thioredoxin disulfide + NADPH.	1	autism
167660682	Alistipes putredinis DSM 17216	1.8.1.9	Thioredoxin-disulfide reductase.	Thioredoxin + NADP(+) = thioredoxin disulfide + NADPH.	0	control
480704622	Clostridium bolteae 90A9	1.8.1.9	Thioredoxin-disulfide reductase.	Thioredoxin + NADP(+) = thioredoxin disulfide + NADPH.	0	autism
167660682	Alistipes putredinis DSM 17216	1.8.1.9	Thioredoxin-disulfide reductase.	Thioredoxin + NADP(+) = thioredoxin disulfide + NADPH.	0	control
480704622	Clostridium bolteae 90A9	1.8.1.9	Thioredoxin-disulfide reductase.	Thioredoxin + NADP(+) = thioredoxin disulfide + NADPH.	0	autism
167660682	Alistipes putredinis DSM 17216	1.8.1.9	Thioredoxin-disulfide reductase.	Thioredoxin + NADP(+) = thioredoxin disulfide + NADPH.	0	control
480704622	Clostridium bolteae 90A9	1.8.1.9	Thioredoxin-disulfide reductase.	Thioredoxin + NADP(+) = thioredoxin disulfide + NADPH.	0	autism
167660682	Alistipes putredinis DSM 17216	1.8.1.9	Thioredoxin-disulfide reductase.	Thioredoxin + NADP(+) = thioredoxin disulfide + NADPH.	0	control
110676061	Clostridium perfringens ATCC 13124	1.8.1.9	Thioredoxin-disulfide reductase.	Thioredoxin + NADP(+) = thioredoxin disulfide + NADPH.	0	autism
167660682	Alistipes putredinis DSM 17216	1.8.1.9	Thioredoxin-disulfide reductase.	Thioredoxin + NADP(+) = thioredoxin disulfide + NADPH.	0	control
110676061	Clostridium perfringens ATCC 13124	1.8.1.9	Thioredoxin-disulfide reductase.	Thioredoxin + NADP(+) = thioredoxin disulfide + NADPH.	0	autism
167660682	Alistipes putredinis DSM 17216	1.8.1.9	Thioredoxin-disulfide reductase.	Thioredoxin + NADP(+) = thioredoxin disulfide + NADPH.	0	control
110676061	Clostridium perfringens ATCC 13124	1.8.1.9	Thioredoxin-disulfide reductase.	Thioredoxin + NADP(+) = thioredoxin disulfide + NADPH.	1	autism
167660682	Alistipes putredinis DSM 17216	1.8.1.9	Thioredoxin-disulfide reductase.	Thioredoxin + NADP(+) = thioredoxin disulfide + NADPH.	0	control
219869941	Desulfovibrio desulfuricans ATCC 27774	1.8.1.9	Thioredoxin-disulfide reductase.	Thioredoxin + NADP(+) = thioredoxin disulfide + NADPH.	1	autism
167660682	Alistipes putredinis DSM 17216	1.8.1.9	Thioredoxin-disulfide reductase.	Thioredoxin + NADP(+) = thioredoxin disulfide + NADPH.	0	control
219869941	Desulfovibrio desulfuricans ATCC 27774	1.8.1.9	Thioredoxin-disulfide reductase.	Thioredoxin + NADP(+) = thioredoxin disulfide + NADPH.	0	autism
167660682	Alistipes putredinis DSM 17216	1.8.1.9	Thioredoxin-disulfide reductase.	Thioredoxin + NADP(+) = thioredoxin disulfide + NADPH.	0	control
219869941	Desulfovibrio desulfuricans ATCC 27774	1.8.1.9	Thioredoxin-disulfide reductase.	Thioredoxin + NADP(+) = thioredoxin disulfide + NADPH.	1	autism
167660682	Alistipes putredinis DSM 17216	1.8.1.9	Thioredoxin-disulfide reductase.	Thioredoxin + NADP(+) = thioredoxin disulfide + NADPH.	0	control
115252745	Peptoclostridium difficile 630	1.8.1.9	Thioredoxin-disulfide reductase.	Thioredoxin + NADP(+) = thioredoxin disulfide + NADPH.	0	autism
167660682	Alistipes putredinis DSM 17216	1.8.1.9	Thioredoxin-disulfide reductase.	Thioredoxin + NADP(+) = thioredoxin disulfide + NADPH.	0	control
115252745	Peptoclostridium difficile 630	1.8.1.9	Thioredoxin-disulfide reductase.	Thioredoxin + NADP(+) = thioredoxin disulfide + NADPH.	1	autism
167660682	Alistipes putredinis DSM 17216	1.8.1.9	Thioredoxin-disulfide reductase.	Thioredoxin + NADP(+) = thioredoxin disulfide + NADPH.	0	control
[truncated: 82,955 more rows]

## Sheet: Table S5-Query2 Filtered Data
Table S5. Query2 Filtered Data.
[truncated: 8 more rows]

## Sheet: Table S6-Query3 Raw Data
Table S6. Query3 Raw Data.
[truncated: 29,675 more rows]

## Sheet: Table S7-Query3 Filtered Data
Table S7. Query3 Filtered Data.
[truncated: 33 more rows]

## Sheet: Table S8- EC-CDS ratios
	Table S8. EC-CDS ratios.
[truncated: 42 more rows]
